# Supplementary material for: A barley pan-transcriptome reveals layers of genotype-dependent transcriptional complexity
Source: Research Square preprint supplement (doi:10.21203/rs.3.rs-3787876/v1), 2024-01-08
Supplement: Supplementary file 1 [file 31adaac95d28ae982c42d726.xlsx]

## Sheet: Sheet1
Supplementary Data 1: Basic statistics of the RTDs
Categories	PanBaRT20	BaRTv2	20 GsRTDs
			Akashinriki	Barke	B1K-04-12	GoldenPromise	Hockett	HOR10350	HOR13821	HOR13942	HOR21599	HOR3081	HOR3365	HOR7552	HOR8148	HOR9043	Igri	Morex	OUN333	RGTPlanet	ZDM01467	ZDM02064	Average
Genome covered bases	167024542	88172513	79671756	86055421	77600539	85323069	82118096	76687169	79409654	75702417	77913651	81391884	78181457	85077999	89939078	88548960	75348804	79488558	79041908	81194989	75072533	79948042	8.06858e+07
Gene number	79580	39434	37914	39168	38586	40577	38667	37393	36480	39619	38026	38134	38211	37988	39177	40826	39974	38322	37069	39177	35483	36424	38360.8
Multi-isoform gene number	28858	20230	16694	17719	17830	18338	18346	16485	16080	17589	17417	16233	15953	18775	19686	18935	18109	18139	17889	18019	15054	16231	17476
Mono-exon gene number	46546	11961	15168	16025	15548	16802	15358	15108	13954	16291	14814	15588	15685	14266	14540	17106	16239	14374	13811	15786	13307	13922	15184.6
Multi-exon gene number	33034	27473	22746	23143	23038	23775	23309	22285	22526	23328	23212	22546	22526	23722	24637	23720	23735	23948	23258	23391	22176	22502	23176.2
Transcript number	581977	148260	108464	138566	131835	128610	147629	105111	106347	105706	114958	109977	96298	156223	175876	168165	124436	109587	130699	122231	84662	111174	123828
Mono-exon transcript number	68374	17411	20699	23447	23325	26049	23935	20582	18846	23212	21281	20749	20704	25535	25701	28777	25274	25538	21811	24107	16640	18864	22753.8
Multi-exon transcript number	513603	130849	87765	115119	108510	102561	123694	84529	87501	82494	93677	89228	75594	130688	150175	139388	99162	84049	108888	98124	68022	92310	101074
Transcript number per gene	7.313	3.76	2.861	3.538	3.417	3.17	3.818	2.811	2.915	2.668	3.023	2.884	2.52	4.112	4.489	4.119	3.113	2.86	3.526	3.12	2.386	3.052	3.2201
Exon number	4807013	1019852	718340	1004519	872991	883637	1058316	691102	746144	628859	766264	771302	610913	1126720	1332820	1224285	755687	677945	894301	812007	531716	806165	845702
Exon number per transcript	8.26	6.879	6.623	7.249	6.622	6.871	7.169	6.575	7.016	5.949	6.666	7.013	6.344	7.212	7.578	7.28	6.073	6.186	6.842	6.643	6.28	7.251	6.7721
Exon average length	296.306	310.734	329.15	320.454	304.577	322.711	302.653	326.29	328.444	324.245	318.262	334.98	344.164	310.909	306.298	306.394	307.125	332.739	307.809	321.5	348.406	327.09	321.21
Intron number	4225036	871592	609876	865953	741149	755022	910665	585986	639797	523153	651306	661325	514615	970487	1156941	1056114	631183	568282	763595	689776	447053	694988	721863
Intron number per transcript	7.26	5.879	5.623	6.249	5.622	5.871	6.169	5.575	6.016	4.949	5.666	6.013	5.344	6.212	6.578	6.28	5.072	5.186	5.842	5.643	5.28	6.251	5.77205
Intron average length	513.494	525.437	506.166	505.276	492.612	506.593	495.433	508.004	510.364	517.898	504.491	498.939	514.649	498.416	500.914	502.023	503.596	514.723	492.692	510.427	518.361	500.114	505.085
Transcript N50	2837	2382	2496	2671	2247	2662	2450	2443	2683	2183	2400	2761	2537	2585	2644	2596	2090	2472	2371	2539	2508	2789	2506.35
Transcript N90	1606	1317	1364	1491	1332	1322	1423	1354	1426	1198	1368	1475	1347	1440	1527	1428	1155	1195	1363	1275	1341	1467	1364.55
Transcript average length (exonic)	2447.43	2137.48	2179.91	2323.09	2016.86	2217.24	2169.65	2145.35	2304.41	1928.98	2121.41	2349.32	2183.37	2242.35	2321.18	2230.62	1865.14	2058.44	2106.17	2135.79	2188.15	2371.85	2172.96
Transcript total length (exonic)	1424344804	316902925	236441592	321901677	265893292	285159707	320302914	225499488	245066596	203904314	243873037	258370655	210254010	350306905	408240457	375112967	232090189	225578611	275274135	261060290	185252926	263688375	2.69664e+08
Categories	Iso-seq RTDs
	Akashinriki	Barke	ZDM02064	ZDM01467	B1K-04-12	GoldenPromise	Hockett	HOR10350	HOR13821	HOR13942	HOR21599	HOR3081	HOR3365	HOR7552	HOR8148	HOR9043	Igri	Morex	OUN333	RGTPlanet	Average
Genome covered bases	50428559	58309957	50262841	38563223	51286788	59685783	57518904	49320868	49108912	49467821	52914881	51434653	46697226	61476626	67247199	62573600	47474049	55190947	52253168	55929431	5.33573e+07
Gene number	19562	20622	18099	15379	21420	23550	22264	20044	18283	22943	21556	18774	18421	22841	24224	23421	23790	24001	21155	22694	21152.2
Multi-isoform gene number	14225	15428	13165	10481	15801	16555	16528	14159	13151	15786	15380	13321	12769	17006	17951	17265	15986	15732	15679	16348	15135.8
Mono-exon gene number	2160	2418	1994	1388	2768	3477	2917	2447	1952	3440	2825	2147	2147	3061	3326	3310	3607	3945	2630	3007	2748.3
Multi-exon gene number	17402	18204	16105	13991	18652	20073	19347	17597	16331	19503	18731	16627	16274	19780	20898	20111	20183	20056	18525	19687	18403.8
Transcript number	81134	111430	82272	49169	106568	104275	124076	79517	78124	81487	91063	80640	65263	133994	153921	143105	97135	83749	106149	98168	97561.9
Mono-exon transcript number	7214	9319	6405	4028	10040	12267	10992	7535	6331	10022	8875	6793	6614	13775	14003	14398	12184	14472	10111	10960	9816.9
Multi-exon transcript number	73920	102111	75867	45141	96528	92008	113084	71982	71793	71465	82188	73847	58649	120219	139918	128707	84951	69277	96038	87208	87745.1
Transcript number per gene	4.148	5.403	4.546	3.197	4.975	4.428	5.573	3.967	4.273	3.552	4.224	4.295	3.543	5.866	6.354	6.11	4.083	3.489	5.018	4.326	4.5685
Exon number	626307	921998	707753	387693	783722	810463	984820	603825	649244	536087	687169	674847	499776	1058422	1265478	1150547	631206	573340	803455	731432	754379
Exon number per transcript	7.719	8.274	8.603	7.885	7.354	7.772	7.937	7.594	8.31	6.579	7.546	8.369	7.658	7.899	8.222	8.04	6.498	6.846	7.569	7.451	7.70625
Exon average length	299.587	299.24	300.39	298.08	281.369	300.263	283.975	296.796	298.221	293.941	294.13	308.721	308.529	294.741	292.998	289.192	276.097	306.794	283.836	298.526	295.271
Intron number	545173	810568	625481	338524	677154	706188	860744	524308	571120	454600	596106	594207	434513	924428	1111557	1007442	534071	489591	697306	633264	656817
Intron number per transcript	6.719	7.274	7.603	6.885	6.354	6.772	6.937	6.594	7.31	5.579	6.546	7.369	6.658	6.899	7.222	7.04	5.498	5.846	6.569	6.451	6.70625
Intron average length	487.255	490.067	481.421	488.041	476.101	493.607	483.898	491.122	490.876	497.338	488.953	480.676	489.277	489.155	492.59	492.856	488.963	501.442	478.005	496.524	488.908
Transcript N50	2516	2709	2876	2549	2223	2704	2455	2442	2749	2102	2401	2849	2579	2608	2665	2617	1963	2473	2347	2551	2518.9
Transcript N90	1509	1637	1681	1541	1429	1423	1531	1493	1610	1259	1488	1715	1552	1546	1627	1549	1174	1248	1467	1369	1492.4
Transcript average length (exonic)	2312.64	2475.98	2584.14	2350.33	2069.24	2333.75	2253.97	2253.76	2478.34	1933.78	2219.53	2583.58	2362.68	2328.17	2408.91	2325.07	1794.14	2100.29	2148.39	2224.26	2277.05
Transcript total length (exonic)	187633337	275898218	212602119	115563358	220514739	243352118	279663921	179212643	193618127	157577905	202117165	208339732	154195265	311960632	370782464	332729333	174274152	175897325	228049054	218351456	2.22117e+08
Categories	RNA-seq RTDs
	Akashinriki	Barke	ZDM02064	ZDM01467	B1K-04-12	GoldenPromise	Hockett	HOR10350	HOR13821	HOR13942	HOR21599	HOR3081	HOR3365	HOR7552	HOR8148	HOR9043	Igri	Morex	OUN333	RGTPlanet	Average
Genome covered bases	84433556	85804857	82197511	82468050	81987020	86928146	83388273	81969556	83166807	83289896	81983453	83874599	83667596	82631667	82717631	86245976	84564774	81558629	84029653	85267043	8.36087e+07
Gene number	37173	37949	35841	35137	37541	39126	37474	36577	35851	38311	37124	37483	37536	36202	36123	38875	38297	35512	36127	37965	37111.2
Multi-isoform gene number	14371	14610	14306	14628	14274	14137	14410	14164	14274	14315	14446	14311	14349	14260	14149	14255	14520	14377	14598	14390	14357.2
Mono-exon gene number	15661	16366	14281	13622	16080	17718	15910	15584	14338	16683	15413	16050	16116	14655	14826	17452	16647	14116	14399	16392	15615.5
Multi-exon gene number	21512	21583	21560	21515	21461	21408	21564	20993	21513	21628	21711	21433	21420	21547	21297	21423	21650	21396	21728	21573	21495.8
Transcript number	79671	82356	77792	79267	78223	79780	78266	77369	77937	79484	77976	79015	79545	75866	77580	82180	80730	77779	78756	80484	79002.8
Mono-exon transcript number	16926	17639	15497	14930	17403	19039	17223	16866	15671	17978	16808	17404	17417	16001	16164	18798	17945	15421	15708	17678	16925.8
Multi-exon transcript number	62745	64717	62295	64337	60820	60741	61043	60503	62266	61506	61168	61611	62128	59865	61416	63382	62785	62358	63048	62806	62077
Transcript number per gene	2.143	2.17	2.17	2.256	2.084	2.039	2.089	2.115	2.174	2.075	2.1	2.108	2.119	2.096	2.148	2.114	2.108	2.19	2.18	2.12	2.1299
Exon number	465607	480598	456201	470009	445808	444042	449421	446859	455764	454332	446328	454970	459826	434383	450608	472223	465993	460065	462790	466283	457106
Exon number per transcript	5.844	5.836	5.864	5.929	5.699	5.566	5.742	5.776	5.848	5.716	5.724	5.758	5.781	5.726	5.808	5.746	5.772	5.915	5.876	5.793	5.78595
Exon average length	395.654	397.76	396.178	395.241	394.139	409.144	396.352	398.211	399.995	393.185	393.86	398.332	396.404	400.937	400.367	398.289	393.361	391.574	399.648	398.572	397.36
Intron number	385936	398242	378409	390742	367585	364262	371155	369490	377827	374848	368352	375955	380281	358517	373028	390043	385263	382286	384034	385799	378103
Intron number per transcript	4.844	4.836	4.864	4.929	4.699	4.566	4.742	4.776	4.848	4.716	4.724	4.758	4.781	4.726	4.808	4.746	4.772	4.915	4.876	4.793	4.78595
Intron average length	506.079	517.606	508.353	507.552	506.485	507.247	510.973	501.818	508.874	510.679	506.706	503.213	507.436	508.279	513.006	510.195	507.634	503.005	503.602	505.169	507.696
Transcript N50	2701	2726	2698	2698	2641	2680	2671	2696	2713	2651	2640	2706	2693	2667	2707	2686	2669	2684	2732	2712	2688.55
Transcript N90	1396	1402	1402	1424	1370	1379	1377	1389	1409	1367	1372	1389	1383	1385	1404	1374	1374	1398	1422	1393	1390.45
Transcript average length (exonic)	2312.25	2321.17	2323.34	2343.56	2246.28	2277.23	2275.94	2299.94	2339.11	2247.45	2254.42	2293.6	2291.49	2295.63	2325.45	2288.65	2270.57	2316.17	2348.43	2309.12	2298.99
Transcript total length (exonic)	184219475	191162606	180736910	185766656	175710350	181677259	178128769	177944306	182303248	178636548	175790563	181229084	182276863	174160330	180408495	188081190	183303393	180149388	184953004	185847527	1.81624e+08
