# Supplementary material for: A barley pan-transcriptome reveals layers of genotype-dependent transcriptional complexity
Source: Research Square preprint supplement (doi:10.21203/rs.3.rs-3787876/v1), 2024-01-08
Supplement: Supplementary file 2 [file 40694b63c232e0c4aa4cc6c3.docx]

**Supplementary Information**

**1. Supplementary Data1_10.zip**

Ten Datasets referred to in the main text (Supplementary Data 1-10), presented in tabular format as separate sheets in a joint Excel formatted file.

Supplementary Data 1: Basic statistics of the RTDs

Supplementary Data 2 Ordering of genotypes incorporated into the linear pan-genome.

Supplementary Data 3: Gene categories of GsRTD

Supplementary Data 4 Alternative splicing events for highly expressed transcripts from core-single-copy genes (average TPM > 10)

Supplementary Data 5 Gene copy number variation cluster significantly correlated with the gene expression.

Supplementary Data 6 C-repeat/DRE-Binding Factor (CBF) genes identifier in GsRTD and their location in the genome

Supplementary Data 7 genotypes with the 141Mb 7H inversion and non-inversion

Supplementary Data 8 Differentially expressed genes in the 7H inversion.

Supplementary Data 9 Detailed example of a split pattern in Golden Promise

Supplementary Data 10 Barley cv. Morex Expression Atlas Metadata

**2. SupplementaryData11.zip**

Supplementary Data 11. This tab delimited text file is too large for inclusion in the main Supplementary Data file and contains the details of how genes/transcripts from the genotype specific RTDs map onto genes in PanBaRT20.
