# Supplementary material for: A barley pan-transcriptome reveals layers of genotype-dependent transcriptional complexity
Source: Research Square preprint supplement (doi:10.21203/rs.3.rs-3787876/v1), 2024-01-08
Supplement: Supplementary file 3 [file 5887b7f17da77c22e2d2eb63.xlsx]

## Sheet: Sheet1
Supplementary Data 6 C-repeat/DRE-Binding Factor (CBF) genes identifier in GsRTD and their location in the genome
	GsRTD	GsRTD	Genome	Genome
Genotype	CBF2a	CBF4b	CBF2a	CBF4b
Akashinriki	Akashinriki_chr5HG23934	Akashinriki_chr5HG23932	chr5H:498928501-498929423	chr5H:498912420-498913345
B1K-04-12	B1K-04-12_chr5HG24451	B1K-04-12_chr5HG24450	chr5H:507216994-507217916	chr5H:507198195-507199121
Barke	Barke_chr5HG24825	Barke_chr5HG24824	chr5H:506317506-506318428	chr5H:506301405-506302337
GoldenPromise	GoldenPromise_chr5HG24294	GoldenPromise_chr5HG24293	chr5H:496677578-496678508	chr5H:496659779-496660703
Hockett	Hockett_chr5HG24269	Hockett_chr5HG24268	chr5H:496801160-496802082	chr5H:496785229-496786062
HOR10350	HOR10350_chr5HG23542	HOR10350_chr5HG23541	chr5H:495589803-495590724	chr5H:495573775-495574607
HOR13821	HOR13821_chr5HG23487	HOR13821_chr5HG23485	chr5H:500218807-500219729	chr5H:500202710-500203638
HOR13821	HOR13821_chr5HG23491	HOR13821_chr5HG23489	chr5H:500241147-500242069	chr5H:500225049-500225977
HOR13821	HOR13821_chr5HG23495	HOR13821_chr5HG23493	chr5H:500263487-500264409	chr5H:500247389-500248317
HOR13942	HOR13942_chr5HG24795	HOR13942_chr5HG24794	chr5H:502581796-502582718	chr5H:502567755-502568677
HOR21599	HOR21599_chr5HG24520	HOR21599_chr5HG24518	chr5H:492735599-492736521	chr5H:492719668-492720501
HOR3081	HOR3081_chr5HG24330	HOR3081_chr5HG24328	chr5H:498003900-498004822	chr5H:497987809-497988734
HOR3081	HOR3081_chr5HG24334	HOR3081_chr5HG24332	chr5H:498025591-498026516	chr5H:498009579-498010504
HOR3081	HOR3081_chr5HG24338	HOR3081_chr5HG24337	chr5H:498047284-498048209	chr5H:498031272-498032197
HOR3365	HOR3365_chr5HG24034	HOR3365_chr5HG24033	chr5H:494643876-494644798	chr5H:494627780-494628707
HOR3365	HOR3365_chr5HG24036	HOR3365_chr5HG24035	chr5H:494666213-494667135	chr5H:494650118-494651045
HOR3365	HOR3365_chr5HG24038	HOR3365_chr5HG24037	chr5H:494688567-494689489	chr5H:494672455-494673383
HOR3365	HOR3365_chr5HG24040	HOR3365_chr5HG24039	chr5H:494710905-494711827	chr5H:494694809-494695737
HOR3365	HOR3365_chr5HG24042	HOR3365_chr5HG24041	chr5H:494733245-494734167	chr5H:494717147-494718075
HOR7552	HOR7552_chr5HG24115	HOR7552_chr5HG24114	chr5H:499469549-499470471	chr5H:499449321-499450250
HOR8148		HOR8148_chr5HG23929	chr5H:497046641-497047563	chr5H:497030710-497031543
HOR9043	HOR9043_chr5HG25316	HOR9043_chr5HG25315	chr5H:497837681-497838611	chr5H:497821596-497822519
Igri	Igri_chr5HG25178	Igri_chr5HG25177	chr5H:502336935-502337857	chr5H:502320843-502321768
Igri	Igri_chr5HG25182	Igri_chr5HG25181	chr5H:502358626-502359551	chr5H:502342614-502343539
Morex	Morex_chr5HG25500	Morex_chr5HG25499	chr5H:495115238-495116160	chr5H:495099157-495100082
OUN333	OUN333_chr5HG23976	OUN333_chr5HG23975	chr5H:496415408-496416330	chr5H:496399477-496400310
RGTPlanet	RGTPlanet_chr5HG24458	RGTPlanet_chr5HG24457	chr5H:504073765-504074695	chr5H:504055966-504056890
ZDM01467	ZDM01467_chr5HG22966	ZDM01467_chr5HG22964	chr5H:500454664-500455613	chr5H:500434457-500435386
ZDM02064	ZDM02064_chr5HG23334	ZDM02064_chr5HG23333	chr5H:498214862-498215811	chr5H:498194655-498195583
