# Supplementary material for: A barley pan-transcriptome reveals layers of genotype-dependent transcriptional complexity
Source: Research Square preprint supplement (doi:10.21203/rs.3.rs-3787876/v1), 2024-01-08
Supplement: Supplementary file 4 [file 732b0737476bdcfb8dc3f8e6.xlsx]

## Sheet: Sheet1
Supplementary Data 5 Gene copy number variation cluster significantly correlated with the gene expression
Cluster number	Pearson Correlation Coefficient	p.value	CNV	Tissue	Representative gene	Gene position	Annotation
144	0.776764	5.6258e-05	2	Caryopsis	chr6H61084	chr6H:251383403-251416251	GO:0005737,GO:0007010,GO:0007166 Refseq&Swissprot ran-binding protein M homolog isoform X1
144	0.663131	0.0014377	2	Embryonic	chr6H61084	chr6H:251383403-251416251	GO:0005737,GO:0007010,GO:0007166 Refseq&Swissprot ran-binding protein M homolog isoform X1
144	0.670418	0.00121723	2	Inflorescence	chr6H61084	chr6H:251383403-251416251	GO:0005737,GO:0007010,GO:0007166 Refseq&Swissprot ran-binding protein M homolog isoform X1
144	0.600752	0.00509265	2	Root	chr6H61084	chr6H:251383403-251416251	GO:0005737,GO:0007010,GO:0007166 Refseq&Swissprot ran-binding protein M homolog isoform X1
144	0.585055	0.00673392	2	Shoot	chr6H61084	chr6H:251383403-251416251	GO:0005737,GO:0007010,GO:0007166 Refseq&Swissprot ran-binding protein M homolog isoform X1
830	0.860161	1.15594e-06	3	Caryopsis	chr2H16402	chr2H:442460476-442479214	GO:0005737,GO:0004033 Refseq&Swissprot probable aldo-keto reductase 2 EC:1.1.1
830	0.651445	0.00186084	3	Embryonic	chr2H16402	chr2H:442460476-442479214	GO:0005737,GO:0004033 Refseq&Swissprot probable aldo-keto reductase 2 EC:1.1.1
830	0.739791	0.000192752	3	Inflorescence	chr2H16402	chr2H:442460476-442479214	GO:0005737,GO:0004033 Refseq&Swissprot probable aldo-keto reductase 2 EC:1.1.1
830	0.91569	1.50068e-08	3	Root	chr2H16402	chr2H:442460476-442479214	GO:0005737,GO:0004033 Refseq&Swissprot probable aldo-keto reductase 2 EC:1.1.1
830	0.795248	2.78011e-05	3	Shoot	chr2H16402	chr2H:442460476-442479214	GO:0005737,GO:0004033 Refseq&Swissprot probable aldo-keto reductase 2 EC:1.1.1
994	0.851932	1.87399e-06	2	Root	chr1H01934	chr1H:83709618-83726876	#N/A
3735	0.694447	0.000680244	2	Inflorescence	chr6H58901	chr6H:93597527-93607314	#N/A
3735	0.70731	0.000486947	2	Root	chr6H58901	chr6H:93597527-93607314	#N/A
3735	0.883972	2.35874e-07	2	Shoot	chr6H58901	chr6H:93597527-93607314	#N/A
3954	0.598503	0.00530522	2	Root	chr4H42495	chr4H:624596851-624606763	GO:0016020,GO:0022857,GO:0055085 Refseq&Swissprot&NR protein ZINC INDUCED FACILITATOR-LIKE 1-like
4454	0.539025	0.0141894	2	Embryonic	chr5H43725	chr5H:6918773-6928050	GO:0016020,GO:0055085 Refseq&Swissprot&NR mechanosensitive ion channel protein 2, chloroplastic-like
4848	0.796414	2.65293e-05	2	Inflorescence	chr7H76854	chr7H:619718123-619726799	GO:0005634,GO:0008540,GO:0034515,GO:0043130,GO:0009751,GO:0043161,GO:0045087,GO:0051726 Swissprot RecName: Full=26S proteasome non-ATPase regulatory subunit 2 homolog A; AltName: Full=26S proteasome regulatory subunit RPN1a; Short=AtRPN1a; AltName: Full=26S proteasome regulatory subunit S2 homolog A
5033	0.822762	8.4475e-06	2	Embryonic	chr5H56507	chr5H:646969767-646978384	GO:0110165,GO:0004674,GO:0004708,GO:0005524,GO:0000165,GO:0006468 Refseq&Swissprot&NR mitogen-activated protein kinase kinase 3-like c("EC:2.7.12.1", "EC:2.7.11.1", "EC:2.7.12.2")
5033	0.917953	1.18467e-08	2	Inflorescence	chr5H56507	chr5H:646969767-646978384	GO:0110165,GO:0004674,GO:0004708,GO:0005524,GO:0000165,GO:0006468 Refseq&Swissprot&NR mitogen-activated protein kinase kinase 3-like c("EC:2.7.12.1", "EC:2.7.11.1", "EC:2.7.12.2")
5033	0.903305	4.91899e-08	2	Root	chr5H56507	chr5H:646969767-646978384	GO:0110165,GO:0004674,GO:0004708,GO:0005524,GO:0000165,GO:0006468 Refseq&Swissprot&NR mitogen-activated protein kinase kinase 3-like c("EC:2.7.12.1", "EC:2.7.11.1", "EC:2.7.12.2")
5033	0.956124	4.87919e-11	2	Shoot	chr5H56507	chr5H:646969767-646978384	GO:0110165,GO:0004674,GO:0004708,GO:0005524,GO:0000165,GO:0006468 Refseq&Swissprot&NR mitogen-activated protein kinase kinase 3-like c("EC:2.7.12.1", "EC:2.7.11.1", "EC:2.7.12.2")
6496	0.932544	2.1466e-09	2	Inflorescence	chr1H01933	chr1H:83354187-83361150	#N/A
6496	0.784495	4.22384e-05	2	Root	chr1H01933	chr1H:83354187-83361150	#N/A
6496	0.951354	1.21371e-10	2	Shoot	chr1H01933	chr1H:83354187-83361150	#N/A
7172	0.715843	0.000386341	3	Root	chr5H44440	chr5H:22433777-22437475	GO:0110165,GO:0048029 Swissprot RecName: Full=Horcolin; AltName: Full=Agglutinin; AltName: Full=Mannose-specific lectin
8330	0.733265	0.000234628	6	Shoot	chr7H78628	chr7H:672976700-672981410	#N/A
8753	0.828894	6.30128e-06	2	Embryonic	chr5H51147	chr5H:503494805-503500907	GO:0005730,GO:0003729,GO:0006417,GO:0009793 Refseq&Swissprot&NR pumilio homolog 24-like
8753	0.892196	1.25544e-07	2	Inflorescence	chr5H51147	chr5H:503494805-503500907	GO:0005730,GO:0003729,GO:0006417,GO:0009793 Refseq&Swissprot&NR pumilio homolog 24-like
8753	0.868277	6.96127e-07	2	Root	chr5H51147	chr5H:503494805-503500907	GO:0005730,GO:0003729,GO:0006417,GO:0009793 Refseq&Swissprot&NR pumilio homolog 24-like
8753	0.848017	2.33474e-06	2	Shoot	chr5H51147	chr5H:503494805-503500907	GO:0005730,GO:0003729,GO:0006417,GO:0009793 Refseq&Swissprot&NR pumilio homolog 24-like
10661	0.636408	0.00255438	2	Caryopsis	chr5H51227	chr5H:508258061-508263388	#N/A
10661	0.571984	0.00841095	2	Inflorescence	chr5H51227	chr5H:508258061-508263388	#N/A
11672	0.458116	0.0422227	2	Root	chr3H28051	chr3H:411958270-411961613	#N/A
11846	0.51828	0.0192294	3	Embryonic	chr1H06142	chr1H:437584533-437589340	GO:0005829,GO:0033925,GO:0006517 Refseq&Swissprot&NR cytosolic endo-beta-N-acetylglucosaminidase 1-like EC:3.2.1.96
13029	0.533357	0.0154462	2	Embryonic	chr7H76006	chr7H:571861571-571864955	GO:0005634,GO:0080040,GO:0070417 Refseq&Swissprot&NR SPX domain-containing protein 1-like
13536	0.842622	3.13014e-06	3	Caryopsis	chr1H04835	chr1H:340156478-340161081	GO:0016020 NR predicted protein
13536	0.978737	7.81343e-14	3	Embryonic	chr1H04835	chr1H:340156478-340161081	GO:0016020 NR predicted protein
13536	0.922314	7.36464e-09	3	Inflorescence	chr1H04835	chr1H:340156478-340161081	GO:0016020 NR predicted protein
13536	0.938226	9.93042e-10	3	Root	chr1H04835	chr1H:340156478-340161081	GO:0016020 NR predicted protein
13536	0.986536	1.31544e-15	3	Shoot	chr1H04835	chr1H:340156478-340161081	GO:0016020 NR predicted protein
15237	0.557648	0.0106268	2	Caryopsis	chr7H69964	chr7H:83823333-83827481	GO:0005634,GO:0005759,GO:0009507,GO:0004017,GO:0005524,GO:0033862,GO:0036430,GO:0036431,GO:0046899,GO:0006207,GO:0006225,GO:0009142,GO:0009173,GO:0016310,GO:0046033,GO:0046705,GO:0046940 Swissprot&NR RecName: Full=UMP-CMP kinase 4; AltName: Full=Deoxycytidylate kinase 4; Short=CK 4; Short=dCMP kinase 4; AltName: Full=Uridine monophosphate/cytidine monophosphate kinase 4; Short=UMP/CMP kinase 4; S…
16224	0.85447	1.61965e-06	2	Inflorescence	chr5H46588	chr5H:131469875-131473923	GO:0032389,GO:0005524,GO:0016887,GO:0030983,GO:0140664,GO:0006298 Refseq&Swissprot&NR DNA mismatch repair protein MLH1-like EC:3.6.1.15
16224	0.718162	0.000362282	2	Root	chr5H46588	chr5H:131469875-131473923	GO:0032389,GO:0005524,GO:0016887,GO:0030983,GO:0140664,GO:0006298 Refseq&Swissprot&NR DNA mismatch repair protein MLH1-like EC:3.6.1.15
17020	0.77756	5.46494e-05	3	Embryonic	chr3H22599	chr3H:14071907-14075421	GO:0016020,GO:0015020 Refseq&Swissprot&NR beta-glucuronosyltransferase GlcAT14A-like EC:2.4.1.17
17020	0.902742	5.17167e-08	3	Inflorescence	chr3H22599	chr3H:14071907-14075421	GO:0016020,GO:0015020 Refseq&Swissprot&NR beta-glucuronosyltransferase GlcAT14A-like EC:2.4.1.17
17020	0.809958	1.50551e-05	3	Root	chr3H22599	chr3H:14071907-14075421	GO:0016020,GO:0015020 Refseq&Swissprot&NR beta-glucuronosyltransferase GlcAT14A-like EC:2.4.1.17
17020	0.912251	2.12308e-08	3	Shoot	chr3H22599	chr3H:14071907-14075421	GO:0016020,GO:0015020 Refseq&Swissprot&NR beta-glucuronosyltransferase GlcAT14A-like EC:2.4.1.17
18748	0.60746	0.0045	2	Embryonic	chr1H05195	chr1H:371829945-371833279	GO:0005829,GO:0002181 Refseq&NR zinc finger CCCH domain-containing protein 15 homolog
18982	0.826618	7.03474e-06	3	Root	chr7H79473	chr7H:694167703-694171212	GO:0016491,GO:0046872 Refseq&Swissprot&NR mugineic-acid 3-dioxygenase-like EC:1
19100	0.7825	4.55306e-05	2	Caryopsis	chr6H65344	chr6H:577505856-577509411	#N/A
19715	0.506122	0.0227893	2	Caryopsis	chr2H12176	chr2H:92606391-92609849	GO:0019005,GO:0031146 Refseq&Swissprot&NR putative F-box/LRR-repeat protein 23
19715	0.557949	0.0105759	2	Embryonic	chr2H12176	chr2H:92606391-92609849	GO:0019005,GO:0031146 Refseq&Swissprot&NR putative F-box/LRR-repeat protein 23
19715	0.497087	0.0257583	2	Inflorescence	chr2H12176	chr2H:92606391-92609849	GO:0019005,GO:0031146 Refseq&Swissprot&NR putative F-box/LRR-repeat protein 23
19715	0.879408	3.28074e-07	2	Shoot	chr2H12176	chr2H:92606391-92609849	GO:0019005,GO:0031146 Refseq&Swissprot&NR putative F-box/LRR-repeat protein 23
20003	0.595491	0.0056012	2	Embryonic	chr7H67464	chr7H:16815981-16819396	GO:0005737,GO:0008233,GO:0006952,GO:0009605,GO:0032501,GO:0042221 Swissprot RecName: Full=Aspartyl protease family protein At5g10770; Flags: Precursor EC:3.4
20003	0.639122	0.00241537	2	Root	chr7H67464	chr7H:16815981-16819396	GO:0005737,GO:0008233,GO:0006952,GO:0009605,GO:0032501,GO:0042221 Swissprot RecName: Full=Aspartyl protease family protein At5g10770; Flags: Precursor EC:3.4
20003	0.584548	0.00679337	2	Shoot	chr7H67464	chr7H:16815981-16819396	GO:0005737,GO:0008233,GO:0006952,GO:0009605,GO:0032501,GO:0042221 Swissprot RecName: Full=Aspartyl protease family protein At5g10770; Flags: Precursor EC:3.4
20183	0.866539	7.78122e-07	2	Inflorescence	chr5H56508	chr5H:646979686-646983065	GO:0005634,GO:0003713,GO:0045893 Refseq DNA-directed RNA polymerase II subunit RPB1-like isoform X2
21724	0.493322	0.0270823	2	Embryonic	chr2H09899	chr2H:5625526-5628627	GO:0048046,GO:0005507,GO:0052716,GO:0046274 Refseq&Swissprot&NR laccase-15-like EC:1.10.3.2
24078	0.511162	0.0212552	2	Root	chr5H51547	chr5H:521852574-521855383	GO:0005576,GO:0020037,GO:0046872,GO:0140825,GO:0006979,GO:0042744,GO:0098869 Refseq&Swissprot&NR peroxidase P7-like EC:1.11.1.7
24615	0.907255	3.42985e-08	2	Caryopsis	chr6H65579	chr6H:586924626-586927303	#N/A
24615	0.908553	3.03597e-08	2	Embryonic	chr6H65579	chr6H:586924626-586927303	#N/A
24615	0.927835	3.87181e-09	2	Inflorescence	chr6H65579	chr6H:586924626-586927303	#N/A
24615	0.905316	4.10221e-08	2	Root	chr6H65579	chr6H:586924626-586927303	#N/A
24615	0.932004	2.30181e-09	2	Shoot	chr6H65579	chr6H:586924626-586927303	#N/A
25293	0.445934	0.0487585	2	Root	chr4H42493	chr4H:624541192-624543869	GO:0016491,GO:0046872 Refseq&Swissprot&NR 2'-deoxymugineic-acid 2'-dioxygenase-like EC:1
25318	0.697461	0.000629957	2	Caryopsis	chr5H51252	chr5H:509192953-509195599	#N/A
25553	0.630193	0.00289811	2	Caryopsis	chr4H34368	chr4H:6767810-6770474	#N/A
25653	0.708274	0.000474572	5	Root	chr2H13706	chr2H:208064900-208067531	GO:0005737,GO:0032991,GO:0005515,GO:0016597,GO:0045548,GO:0006559,GO:0006952,GO:0006979,GO:0009555,GO:0009800,GO:0009819,GO:0009820,GO:0010224,GO:0046244,GO:0046274 Swissprot&NR RecName: Full=Phenylalanine ammonia-lyase c("EC:4.3.1.24", "EC:4.3.1.25")
25653	0.642936	0.00223072	5	Shoot	chr2H13706	chr2H:208064900-208067531	GO:0005737,GO:0032991,GO:0005515,GO:0016597,GO:0045548,GO:0006559,GO:0006952,GO:0006979,GO:0009555,GO:0009800,GO:0009819,GO:0009820,GO:0010224,GO:0046244,GO:0046274 Swissprot&NR RecName: Full=Phenylalanine ammonia-lyase c("EC:4.3.1.24", "EC:4.3.1.25")
26346	0.453344	0.0446972	4	Root	chr2H10067	chr2H:11920138-11922699	GO:0016020,GO:0005488,GO:0016709 Refseq&Swissprot&NR cytochrome P450 89A2-like EC:1.14.13
27074	0.644883	0.00214107	2	Shoot	chr2H09900	chr2H:5626157-5628203	#N/A
27087	0.794082	2.91244e-05	2	Caryopsis	chr2H17456	chr2H:534643267-534645739	GO:0030598,GO:0017148 NR uncharacterized protein LOC123426828 EC:3.2.2.22
27087	0.768543	7.53974e-05	2	Embryonic	chr2H17456	chr2H:534643267-534645739	GO:0030598,GO:0017148 NR uncharacterized protein LOC123426828 EC:3.2.2.22
27087	0.780365	4.92968e-05	2	Inflorescence	chr2H17456	chr2H:534643267-534645739	GO:0030598,GO:0017148 NR uncharacterized protein LOC123426828 EC:3.2.2.22
27087	0.756509	0.000113399	2	Root	chr2H17456	chr2H:534643267-534645739	GO:0030598,GO:0017148 NR uncharacterized protein LOC123426828 EC:3.2.2.22
27087	0.645194	0.00212704	2	Shoot	chr2H17456	chr2H:534643267-534645739	GO:0030598,GO:0017148 NR uncharacterized protein LOC123426828 EC:3.2.2.22
30031	0.464025	0.0393072	2	Inflorescence	chr1H00037	chr1H:1697677-1699739	#N/A
30057	0.492921	0.0272265	2	Root	chr3H32253	chr3H:640576306-640578062	#N/A
30890	0.471621	0.0357913	2	Root	chr6H66027	chr6H:601391309-601393396	GO:0030410,GO:0009555,GO:0009860,GO:0010043,GO:0010233,GO:0030418 Swissprot&NR RecName: Full=Nicotianamine synthase 1; AltName: Full=S-adenosyl-L-methionine:S-adenosyl-L-methionine:S-adenosyl-methionine 3-amino-3-carboxypropyltransferase 1; Short=OsNAS1 EC:2.5.1.43
31149	0.771578	6.77658e-05	2	Caryopsis	chr7H78257	chr7H:663695227-663697163	GO:0010286,GO:0010087,GO:0016604,GO:0000976,GO:0060862,GO:0009735,GO:0009414,GO:0009733,GO:0051301,GO:0003700,GO:0008219,GO:0045892,GO:0045893,GO:0071454,GO:0019760,GO:0005829,GO:0051726,GO:0071456,GO:0010030,GO:0009880,GO:0009864,GO:0005886,GO:0048825,GO:0009739,GO:0005515,GO:0009737,GO:0010105,GO:0090708 Swissprot&NR RecName: Full=Ethylene-responsive transcription factor ESR2; AltName: Full=Pro…
31204	0.733538	0.000232731	3	Root	chr5H45806	chr5H:65901430-65903259	GO:0009718,GO:0000166,GO:0009409,GO:0042406,GO:0005515,GO:0045552,GO:0009809,GO:0080110,GO:0048316,GO:0016621,GO:0042754,GO:0010597 Swissprot RecName: Full=Dihydroflavonol 4-reductase; Short=DFR; AltName: Full=Dihydrokaempferol 4-reductase; AltName: Full=Flavanone 4-reductase; Short=FNR c("EC:1.1.1.219", "EC:1.2.1.44")
31225	0.551233	0.0117609	2	Caryopsis	chr1H09633	chr1H:556151527-556153585	#N/A
31225	0.618963	0.00361667	2	Inflorescence	chr1H09633	chr1H:556151527-556153585	#N/A
31545	0.797109	2.57953e-05	2	Caryopsis	chr3H27993	chr3H:410098156-410099748	GO:0016020,GO:0016616 Refseq&Swissprot&NR dihydroflavonol 4-reductase EC:1.1.1
32331	0.623219	0.0033287	3	Root	chr2H10077	chr2H:12152295-12154257	GO:0016020,GO:0004497,GO:0005506,GO:0016705,GO:0020037 Refseq&Swissprot&NR cytochrome P450 99A2-like EC:1.14
32781	0.700628	0.000580529	3	Embryonic	chr3H34075	chr3H:678412364-678414018	#N/A
34223	0.624025	0.0032764	2	Inflorescence	chr6H59949	chr6H:148503939-148505531	#N/A
34223	0.788195	3.66749e-05	2	Root	chr6H59949	chr6H:148503939-148505531	#N/A
34223	0.862471	1.00388e-06	2	Shoot	chr6H59949	chr6H:148503939-148505531	#N/A
34302	0.670152	0.00122475	3	Shoot	chr6H57514	chr6H:19714773-19716579	GO:0008233 Refseq&Swissprot&NR ervatamin-B-like EC:3.4
34380	0.585298	0.00670553	3	Embryonic	chr7H68817	chr7H:37127598-37129398	GO:0016747 Refseq&Swissprot&NR coniferyl alcohol acyltransferase-like EC:2.3.1
35073	0.712823	0.000419705	18	Root	chr7H79494	chr7H:694826010-694827095	#N/A
35584	0.588546	0.00633587	5	Embryonic	chr1H01204	chr1H:36092626-36094304	GO:0008171,GO:0008757,GO:0046983,GO:0019438,GO:0032259 Refseq&Swissprot&NR tricetin 3',4',5'-O-trimethyltransferase-like EC:2.1.1
35597	0.781213	4.77699e-05	3	Caryopsis	chr1H01322	chr1H:39862366-39863629	#N/A
36846	0.466244	0.0382537	2	Embryonic	chr1H05516	chr1H:394981608-394982799	GO:0003824 NR putative reverse transcriptase
37505	0.79585	2.7138e-05	3	Embryonic	chr3H34076	chr3H:678412434-678413906	#N/A
37631	0.471512	0.0358402	3	Embryonic	chr2H10666	chr2H:25343375-25344925	#N/A
37631	0.708858	0.000467209	3	Shoot	chr2H10666	chr2H:25343375-25344925	#N/A
37742	0.592298	0.00592972	2	Root	chr3H29880	chr3H:545133637-545135104	GO:0005576,GO:0016020,GO:0009828,GO:0010311 Swissprot&NR RecName: Full=Expansin-A4; AltName: Full=Alpha-expansin-4; AltName: Full=OsEXP4; AltName: Full=OsEXPA4; AltName: Full=OsaEXPa1.22; Flags: Precursor
37894	0.83318	5.09899e-06	5	Embryonic	chr6H56660	chr6H:1405953-1407061	GO:0005576,GO:0090729,GO:0006952,GO:0035821 Swissprot&NR RecName: Full=Leaf-specific thionin DB4; Contains: RecName: Full=Leaf-specific thionin DB4; Contains: RecName: Full=Acidic protein; Flags: Precursor
38344	0.622557	0.00337221	5	Embryonic	chr6H64860	chr6H:559042424-559043924	#N/A
39685	0.815667	1.16988e-05	2	Caryopsis	chr5H56576	chr5H:648886555-648887965	#N/A
39926	0.59331	0.00582399	3	Caryopsis	chr7H67887	chr7H:23253559-23254954	#N/A
39951	0.526778	0.0170158	2	Caryopsis	chr2H11613	chr2H:63092842-63094235	GO:0102911,GO:0042802,GO:0009750,GO:0010182,GO:0006561,GO:0042742,GO:0009414,GO:0000166,GO:0009408,GO:0031525,GO:0009807,GO:0010115,GO:0005829,GO:0010301,GO:0018459,GO:0018458 Swissprot RecName: Full=Secoisolariciresinol dehydrogenase c("EC:1.1.1.223", "EC:1.1.1.288", "EC:1.1.1.243", "EC:1.1.1.1", "EC:1.1.1.71")
39951	0.464375	0.0391393	2	Embryonic	chr2H11613	chr2H:63092842-63094235	GO:0102911,GO:0042802,GO:0009750,GO:0010182,GO:0006561,GO:0042742,GO:0009414,GO:0000166,GO:0009408,GO:0031525,GO:0009807,GO:0010115,GO:0005829,GO:0010301,GO:0018459,GO:0018458 Swissprot RecName: Full=Secoisolariciresinol dehydrogenase c("EC:1.1.1.223", "EC:1.1.1.288", "EC:1.1.1.243", "EC:1.1.1.1", "EC:1.1.1.71")
39951	0.451458	0.0457048	2	Shoot	chr2H11613	chr2H:63092842-63094235	GO:0102911,GO:0042802,GO:0009750,GO:0010182,GO:0006561,GO:0042742,GO:0009414,GO:0000166,GO:0009408,GO:0031525,GO:0009807,GO:0010115,GO:0005829,GO:0010301,GO:0018459,GO:0018458 Swissprot RecName: Full=Secoisolariciresinol dehydrogenase c("EC:1.1.1.223", "EC:1.1.1.288", "EC:1.1.1.243", "EC:1.1.1.1", "EC:1.1.1.71")
40768	0.533265	0.0154675	2	Root	chr4H43410	chr4H:653852252-653853590	GO:0048046,GO:0030145 Refseq&Swissprot&NR germin-like protein 8-11
41313	0.605962	0.00462716	2	Shoot	chr5H54987	chr5H:607766718-607768021	GO:0000166,GO:0005515 NR mitochondrial ATP synthase g subunit family protein
41729	0.506554	0.0226544	7	Root	chr5H44442	chr5H:22447520-22448752	GO:0110165,GO:0048029 Swissprot RecName: Full=Horcolin; AltName: Full=Agglutinin; AltName: Full=Mannose-specific lectin
41866	0.704037	0.000531042	7	Embryonic	chr7H78061	chr7H:658027527-658028314	#N/A
42873	0.601292	0.00504265	3	Shoot	chr6H57515	chr6H:19715480-19716683	#N/A
43303	0.779225	5.14147e-05	2	Root	chr3H32251	chr3H:640568110-640569283	#N/A
43471	0.456749	0.0429206	2	Caryopsis	chr7H76208	chr7H:586837894-586839057	GO:0048046,GO:0030145 Swissprot&NR RecName: Full=Germin-like protein 8-12; Flags: Precursor
43636	0.77799	5.37978e-05	3	Root	chr3H32272	chr3H:640945261-640946341	#N/A
44159	0.921548	8.02147e-09	5	Caryopsis	chr1H01323	chr1H:39862428-39863547	#N/A
44363	0.639002	0.00242135	3	Root	chr4H41637	chr4H:586295437-586296358	#N/A
44530	0.478062	0.0330064	2	Caryopsis	chr2H10584	chr2H:22579160-22580253	GO:0009506,GO:0009507,GO:0019034,GO:0003729,GO:0005515,GO:0016984,GO:0009853,GO:0019253 Swissprot&NR RecName: Full=Ribulose bisphosphate carboxylase small subunit, chloroplastic; Short=RuBisCO small subunit; Flags: Precursor EC:4.1.1.39
44761	0.618163	0.00367304	2	Embryonic	chr5H49896	chr5H:429151199-429152280	#N/A
44764	0.754554	0.000120911	2	Caryopsis	chr7H66820	chr7H:7243568-7244649	#N/A
45096	0.87107	5.80151e-07	2	Caryopsis	chr1H01295	chr1H:39062671-39063729	#N/A
45204	0.63033	0.0028901	3	Shoot	chr2H10665	chr2H:25343369-25344416	#N/A
45216	0.706589	0.000496392	2	Inflorescence	chr1H05974	chr1H:425495606-425496656	GO:0000786,GO:0005634,GO:0010369,GO:0003677,GO:0030527,GO:0046982 Refseq&Swissprot&NR histone H3
45300	0.759028	0.000104313	2	Caryopsis	chr7H66821	chr7H:7243581-7244626	GO:0004857,GO:0043086 NR putative pectinesterase inhibitor domain containing protein
45537	0.565406	0.00937547	4	Caryopsis	chr6H58505	chr6H:62671645-62672410	#N/A
45564	0.625241	0.00319872	5	Embryonic	chr7H78071	chr7H:658126746-658127774	GO:0005576,GO:0005783,GO:0009505,GO:0009506,GO:0009707,GO:0043621,GO:0009409,GO:0009651,GO:0009682,GO:0009733,GO:0009737,GO:0010102,GO:0050832 Swissprot RecName: Full=Cortical cell-delineating protein; AltName: Full=Root-specific protein ZRP3; Flags: Precursor
45564	0.465936	0.0383983	5	Root	chr7H78071	chr7H:658126746-658127774	GO:0005576,GO:0005783,GO:0009505,GO:0009506,GO:0009707,GO:0043621,GO:0009409,GO:0009651,GO:0009682,GO:0009733,GO:0009737,GO:0010102,GO:0050832 Swissprot RecName: Full=Cortical cell-delineating protein; AltName: Full=Root-specific protein ZRP3; Flags: Precursor
45564	0.635877	0.00258234	5	Shoot	chr7H78071	chr7H:658126746-658127774	GO:0005576,GO:0005783,GO:0009505,GO:0009506,GO:0009707,GO:0043621,GO:0009409,GO:0009651,GO:0009682,GO:0009733,GO:0009737,GO:0010102,GO:0050832 Swissprot RecName: Full=Cortical cell-delineating protein; AltName: Full=Root-specific protein ZRP3; Flags: Precursor
45699	0.593297	0.00582534	3	Root	chr3H32252	chr3H:640568209-640569227	#N/A
46142	0.546547	0.0126499	10	Root	chr3H33758	chr3H:670873838-670874745	GO:0005576,GO:0009414,GO:0009611,GO:0009617,GO:0009627,GO:0009723,GO:0009751,GO:0009753,GO:0010266,GO:0080027 Swissprot RecName: Full=Pathogenesis-related protein PRMS; Flags: Precursor
46381	0.454598	0.0440361	5	Embryonic	chr7H78064	chr7H:658058223-658058727	#N/A
46381	0.561019	0.0100673	5	Root	chr7H78064	chr7H:658058223-658058727	#N/A
46459	0.782385	4.57269e-05	9	Root	chr3H32261	chr3H:640863810-640864782	#N/A
46839	0.840297	3.5399e-06	2	Caryopsis	chr5H56577	chr5H:648886664-648887613	GO:0004857,GO:0043086 NR predicted protein
47078	0.571346	0.00850079	5	Root	chr6H56766	chr6H:4427062-4427997	#N/A
47170	0.544259	0.013103	7	Embryonic	chr7H78062	chr7H:658027533-658028310	GO:0005576,GO:0005783,GO:0009505,GO:0009506,GO:0009707,GO:0043621,GO:0009409,GO:0009651,GO:0009682,GO:0009733,GO:0009737,GO:0010102,GO:0050832 Swissprot RecName: Full=Cortical cell-delineating protein; AltName: Full=Root-specific protein ZRP3; Flags: Precursor
47303	0.916033	1.44834e-08	2	Caryopsis	chr3H33913	chr3H:674735283-674736094	#N/A
47558	0.811496	1.40782e-05	2	Root	chr5H54202	chr5H:591317846-591318738	#N/A
47817	0.494482	0.026669	5	Caryopsis	chr6H56732	chr6H:3423980-3424834	#N/A
47921	0.463422	0.0395973	4	Root	chr5H54629	chr5H:601221374-601222259	GO:0005615,GO:0009414,GO:0009611,GO:0009617,GO:0009627,GO:0009723,GO:0009751,GO:0009753,GO:0010266,GO:0080027 Swissprot&NR RecName: Full=Pathogenesis-related protein PRMS; Flags: Precursor
48136	0.803793	1.95887e-05	2	Embryonic	chr1H05521	chr1H:395036143-395037014	#N/A
48136	0.74709	0.000153659	2	Root	chr1H05521	chr1H:395036143-395037014	#N/A
48156	0.862835	9.81579e-07	10	Root	chr7H67908	chr7H:23583597-23584404	GO:0110165 Swissprot RecName: Full=Leaf-specific thionin; Contains: RecName: Full=Leaf-specific thionin; Contains: RecName: Full=Acidic protein; Flags: Precursor
49004	0.525376	0.0173662	2	Caryopsis	chr5H44665	chr5H:33279349-33280166	#N/A
49053	0.682108	0.000923199	3	Root	chr1H00128	chr1H:3308907-3309709	#N/A
49817	0.728027	0.000273646	2	Caryopsis	chr1H01328	chr1H:40043699-40044465	#N/A
50525	0.810853	1.44798e-05	3	Caryopsis	chr5H50859	chr5H:487050519-487051174	#N/A
51371	0.496103	0.0260994	3	Caryopsis	chr5H45656	chr5H:63095127-63095499	#N/A
55885	0.702063	0.000559248	2	Inflorescence	chr2H19600	chr2H:660730409-660730834	#N/A
