# Supplementary material for: A barley pan-transcriptome reveals layers of genotype-dependent transcriptional complexity
Source: Research Square preprint supplement (doi:10.21203/rs.3.rs-3787876/v1), 2024-01-08
Supplement: Supplementary file 5 [file 7d0163275c40618054e1a540.xlsx]

## Sheet: Sheet1
Supplementary Data 8 Differentially expressed genes in the 7H inversion
PanBaRT Gene ID	logFC	adj.P.Val	Annotation
chr7H75123	0.934776	3.41491e-11	GO:0008964,GO:0006099,GO:0015977 Refseq&Swissprot&NR phosphoenolpyruvate carboxylase 1-like c("EC:4.1.1.31", "EC:4.1.1.32")
chr7H75162	0.658366	9.41919e-19	GO:0005759,GO:0009507,GO:0003746,GO:0070125 Swissprot&NR RecName: Full=Elongation factor Ts, mitochondrial; Short=EF-Ts; Short=EF-TsMt; Flags: Precursor NULL
chr7H75181	3.48013	1.28678e-29	GO:0005488 Refseq agamous-like MADS-box protein AGL61 NULL
chr7H75210	1.86112	3.79607e-80	GO:0016020,GO:0035091,GO:0043130,GO:0043328 Refseq&Swissprot&NR TOM1-like protein 9 NULL
chr7H75214	3.47189	3.64325e-43	GO:0005737,GO:0043231,GO:0003676,GO:0009987 Swissprot&NR RecName: Full=Transcription termination factor MTERF6, chloroplastic/mitochondrial; AltName: Full=Mitochondrial transcription termination factor 6; AltName: Full=Protein PIGMENT DEFECTIVE 191; Flags: Precursor NULL
chr7H75215	0.660501	3.96213e-22	GO:0005634,GO:0006355 Refseq&Swissprot&NR protein tesmin/TSO1-like CXC 5 NULL
chr7H75276	1.24222	7.85405e-14	na
chr7H75283	0.606794	3.06318e-23	na
chr7H75322	0.896826	7.87441e-39	GO:0005739,GO:0004015,GO:0030170,GO:0034387,GO:0102351,GO:0009102,GO:0009448 Refseq&Swissprot&NR probable gamma-aminobutyrate transaminase 3, mitochondrial c("EC:2.6.1.62", "EC:2.6.1.96")
chr7H75326	1.90996	1.09855e-13	GO:0005737,GO:0035251,GO:0006805,GO:0046148,GO:1901576 Swissprot&NR RecName: Full=Anthocyanidin 5,3-O-glucosyltransferase; AltName: Full=UDP-glucose: anthocyanidin 5,3-O-glucosyltransferase EC:2.4.1
chr7H75329	0.753816	2.55454e-21	GO:0009507,GO:0009658 Refseq&Swissprot protein DJ-1 homolog C-like NULL
chr7H75338	3.29397	7.43728e-17	GO:0004838,GO:0030170,GO:0006572,GO:0009058 Refseq&Swissprot&NR nicotianamine aminotransferase 1-like EC:2.6.1.5
chr7H75344	0.741522	1.25809e-23	GO:0110165 Swissprot&NR RecName: Full=Reticulon-like protein B17; Short=AtRTNLB17 NULL
chr7H75359	0.803394	1.19577e-33	GO:0031969,GO:0099402 Refseq&NR protein RETICULATA-RELATED 1, chloroplastic-like NULL
chr7H75372	2.04009	8.97145e-42	GO:0005737,GO:0033743,GO:0046872,GO:0006979,GO:0030091 Refseq&Swissprot&NR peptide methionine sulfoxide reductase B1, chloroplastic-like EC:1.8.4.12
chr7H75374	0.689835	4.65482e-16	GO:0005789,GO:0006886,GO:0006888,GO:0070973 Refseq&NR B-cell receptor-associated protein 31-like NULL
chr7H75382	0.73361	2.61032e-17	GO:0009501,GO:0003844,GO:0004553,GO:0043169,GO:0102752,GO:0005978,GO:0005983,GO:0019252 Refseq&Swissprot&NR 1,4-alpha-glucan-branching enzyme 3, chloroplastic/amyloplastic isoform X1 c("EC:2.4.1.18", "EC:3.2.1")
chr7H75386	0.803666	1.35221e-12	GO:0009501,GO:0003844,GO:0004553,GO:0043169,GO:0102752,GO:0005978,GO:0005983,GO:0019252 Refseq&Swissprot&NR 1,4-alpha-glucan-branching enzyme 3, chloroplastic/amyloplastic isoform X1 c("EC:2.4.1.18", "EC:3.2.1")
chr7H75400	1.48575	3.81587e-49	GO:0110165,GO:0009908,GO:0010467,GO:0016070,GO:0050794,GO:0051093 Swissprot RecName: Full=Protein HUA2-LIKE 1; AltName: Full=HUA2-like protein 1 NULL
chr7H75420	1.09548	1.90604e-20	GO:0005634,GO:0004519,GO:0016301,GO:0016887,GO:0002833,GO:0016310,GO:0031349,GO:0032103,GO:0090305 Refseq&Swissprot&NR protein MICRORCHIDIA 2-like isoform X1 c("EC:3.1", "EC:2.7", "EC:3.6.1.15")
chr7H75424	0.935058	5.27284e-17	GO:0016853 Refseq&Swissprot 3-beta hydroxysteroid dehydrogenase/isomerase EC:5
chr7H75433	0.850346	1.68936e-20	GO:0016020 NR predicted protein NULL
chr7H75467	1.51808	5.30154e-22	na
chr7H75469	0.608995	5.99219e-21	GO:0015995,GO:0010187,GO:0010161,GO:0000978,GO:1905421,GO:0006783,GO:0080113,GO:0009637,GO:0009409,GO:0048440,GO:0009826,GO:1990785,GO:0009704,GO:0045893,GO:0010218,GO:0010313,GO:0042548,GO:0042802,GO:0009567,GO:0048767,GO:0009686,GO:0009740,GO:0007623,GO:0080006,GO:0009867,GO:0000981,GO:0006357,GO:0005634,GO:0009959,GO:0009957,GO:0048235,GO:0031542,GO:0010100,GO:0090229,GO:0010026,GO:0010047 Swi…
chr7H75519	1.52547	2.21822e-25	GO:0005634,GO:0005737,GO:0003729,GO:0003924,GO:0005515,GO:0005525,GO:0000054,GO:0006606 Refseq&Swissprot&NR GTP-binding nuclear protein Ran-3 EC:3.6.1.15
chr7H75534	1.73244	6.11271e-11	GO:0110165,GO:0020037,GO:0006979 Refseq&Swissprot&NR uncharacterized protein LOC123412280 NULL
chr7H75538	1.19988	7.46201e-52	na
chr7H75548	1.16403	3.74343e-13	na
chr7H75554	1.88059	2.94705e-58	GO:0016020,GO:0004175,GO:0016485,GO:0080120 Refseq&NR uncharacterized protein LOC123411827 EC:3.4
chr7H75596	0.769896	9.20879e-13	GO:0009691 Refseq&Swissprot&NR probable cytokinin riboside 5'-monophosphate phosphoribohydrolase LOGL10 NULL
chr7H75601	0.702786	5.97486e-11	GO:0004029 Refseq&Swissprot&NR aldehyde dehydrogenase family 2 member C4-like c("EC:1.2.1.5", "EC:1.2.1.3")
chr7H75625	0.710875	1.30119e-11	GO:0009507,GO:0042170,GO:0005515,GO:0016628,GO:0097159,GO:1901363,GO:0016114,GO:0032501,GO:0048856,GO:0050896 Swissprot RecName: Full=Protochlorophyllide reductase, chloroplastic; Short=PCR; AltName: Full=NADPH-protochlorophyllide oxidoreductase; Short=POR; Flags: Precursor EC:1.3.1
chr7H75648	0.850334	6.70293e-16	na
chr7H75663	1.94789	1.7004e-28	chr7H75663.1 GO:0016020 NR predicted protein NULL
chr7H75667	3.48563	8.38161e-20	GO:0005743,GO:0008381,GO:0006810,GO:0034599 Swissprot&NR RecName: Full=Mechanosensitive ion channel protein 1, mitochondrial; AltName: Full=Mechanosensitive channel of small conductance-like 1; AltName: Full=MscS-Like protein 1; Flags: Precursor NULL
chr7H76069	1.82204	6.05429e-20	na
chr7H76808	-3.43927	4.01965e-21	na
chr7H76856	-1.02049	9.62657e-12	GO:0005634,GO:0008540,GO:0034515,GO:0043130,GO:0009751,GO:0043161,GO:0045087,GO:0051726 Swissprot&NR RecName: Full=26S proteasome non-ATPase regulatory subunit 2 homolog B; AltName: Full=26S proteasome regulatory subunit RPN1b; Short=AtRPN1b; AltName: Full=26S proteasome regulatory subunit S2 homolog B NULL
chr7H76924	-1.48346	6.85362e-14	na
chr7H76991	-4.90679	5.47914e-25	chr7H76991.2 GO:0016020 NR predicted protein NULL
chr7H77028	-4.02856	1.75113e-25	GO:0000781,GO:0005662,GO:0035861,GO:0003697,GO:0005515,GO:0000724,GO:0006260,GO:0006289 Refseq&Swissprot&NR replication protein A 32 kDa subunit C-like NULL
chr7H77031	-1.76036	2.88725e-22	GO:0045814,GO:0032922,GO:0042802,GO:0048587,GO:0016607,GO:0061087,GO:0035064,GO:1900111,GO:0031519,GO:0051571,GO:0005677,GO:0010048 Swissprot&NR RecName: Full=VIN3-like protein 2; AltName: Full=Vernalization5/VIN3-like protein 1 NULL
chr7H77040	-1.53867	5.03293e-16	GO:0005886,GO:0005262,GO:0006816,GO:0007231,GO:0033500,GO:0048528,GO:0071260 Swissprot&NR RecName: Full=Cell number regulator 13; AltName: Full=ZmCNR13 NULL
chr7H77043	-1.23001	8.10267e-12	na
chr7H77130	-3.69884	9.88162e-12	GO:0005622,GO:0005488,GO:0010033,GO:0048583,GO:0051716,GO:0098542 Swissprot&NR RecName: Full=Disease resistance protein RGA5; AltName: Full=Os11gRGA5 NULL
chr7H77141	-2.2727	2.14523e-14	na
chr7H77197	-2.71689	7.38392e-16	GO:0005737,GO:0016020,GO:0008168,GO:0032259 Refseq&Swissprot&NR probable methyltransferase PMT9 EC:2.1.1
chr7H77199	-1.22898	1.21158e-17	na
chr7H77207	-2.16286	3.74343e-13	na
chr7H77300	-1.55047	2.78852e-15	GO:0016616 Refseq&Swissprot putative anthocyanidin reductase EC:1.1.1
chr7H77398	-0.664584	6.24893e-11	GO:0005634,GO:0005737,GO:0003729,GO:0031386,GO:0031625,GO:0016567,GO:0019941 Refseq&Swissprot&NR polyubiquitin 11 NULL
chr7H77468	-6.19306	1.35844e-47	GO:0005634,GO:0005737,GO:0003729,GO:0031386,GO:0031625,GO:0016567,GO:0019941 Refseq&Swissprot&NR polyubiquitin NULL
chr7H77469	-6.16841	3.49262e-38	na
chr7H77485	-4.91052	9.52818e-29	GO:0016020,GO:0008168,GO:0016301,GO:0016310,GO:0032259 Refseq&NR uncharacterized LOC100280158 c("EC:2.7", "EC:2.1.1")
chr7H77512	-2.29781	4.80079e-12	na
chr7H77719	-4.13738	1.08413e-38	na
chr7H77808	-0.65317	1.42125e-12	GO:0005886,GO:0004674,GO:0005524,GO:0006468 Refseq&Swissprot&NR cold-responsive protein kinase 1-like EC:2.7.11.1
chr7H77845	-0.514949	2.47048e-13	GO:0071470,GO:0010928,GO:0009787,GO:2000028 Swissprot RecName: Full=Glycine-rich domain-containing protein 2; Short=AtGRDP2 NULL
chr7H77875	-4.02331	2.75253e-14	GO:0005788,GO:0009705,GO:0016363,GO:0016592,GO:0002020,GO:0000304,GO:0009408,GO:0009555,GO:0009615,GO:0009846,GO:0009860,GO:0010033,GO:0033554,GO:0034975 Swissprot&NR RecName: Full=Luminal-binding protein; Short=BiP; AltName: Full=78 kDa glucose-regulated protein homolog; Short=GRP-78; Flags: Precursor NULL
chr7H77880	-4.35239	3.5265e-21	na
chr7H77932	-2.39511	1.26033e-23	GO:0005634,GO:0006623,GO:0016192,GO:0043170,GO:0044238 Refseq&NR vacuolar protein sorting-associated protein 8 homolog isoform X1 NULL
chr7H77933	-0.84033	8.87682e-15	na
chr7H77955	-6.18996	4.88531e-39	GO:0016020,GO:0015297,GO:0042910,GO:1990961 Refseq&Swissprot protein DETOXIFICATION 16-like NULL
chr7H77977	-1.48636	6.02345e-19	na
chr7H77987	-3.07619	4.54393e-20	GO:0048364,GO:0003677,GO:0050794,GO:0048608,GO:0048367,GO:0009791,GO:0009725,GO:0048518 Swissprot&NR RecName: Full=Auxin response factor 16 NULL
chr7H77988	-1.95267	7.25757e-32	GO:0005634,GO:0000977,GO:0003700,GO:0005515,GO:0006357,GO:0007584,GO:0009553,GO:0010094,GO:0010582,GO:0019252,GO:0043068,GO:0045893,GO:0048455,GO:0048459,GO:0048509,GO:0048527,GO:0048833,GO:0071249,GO:0080060,GO:0080112 Swissprot&NR RecName: Full=MADS-box transcription factor 26; AltName: Full=FDRMADS3; AltName: Full=OsMADS26; AltName: Full=RMADS220 NULL
chr7H78016	-4.84963	5.12619e-22	na
chr7H78025	-2.61184	4.92249e-25	GO:0005634,GO:0005737,GO:0005840,GO:1990904,GO:0003729,GO:0003735,GO:0004784,GO:0016151,GO:0031386,GO:0031625,GO:0006412,GO:0016567,GO:0019430,GO:0019941 Refseq&Swissprot&NR ubiquitin-60S ribosomal protein L40 EC:1.15.1.1
chr7H78031	-4.00153	2.90571e-24	GO:0005829,GO:0005886,GO:0090406,GO:0004190,GO:0006508,GO:0006952,GO:0009555,GO:0009846,GO:0009860,GO:0010183,GO:0030163,GO:0050794 Swissprot&NR RecName: Full=Aspartic proteinase Asp1; Short=OSAP1; Short=OsAsp1; AltName: Full=Nucellin-like protein; Flags: Precursor EC:3.4.23
chr7H78038	-1.31339	2.66952e-11	GO:0010033,GO:1901700 Swissprot RecName: Full=F-box protein At5g07610 NULL
chr7H78103	-3.12024	3.56388e-11	GO:0005634,GO:0005829,GO:0005886,GO:0004674,GO:0005516,GO:0031625,GO:0042742,GO:0046777,GO:0071215,GO:0071446 Swissprot&NR RecName: Full=Cysteine-rich receptor-like protein kinase 26; Short=Cysteine-rich RLK26; Flags: Precursor EC:2.7.11.1
chr7H78116	-4.34039	4.27386e-14	GO:0005634,GO:0005829,GO:0005886,GO:0004674,GO:0005516,GO:0031625,GO:0038023,GO:0042802,GO:0002376,GO:0007166,GO:0032496,GO:0042742,GO:0046777,GO:0071215,GO:0071446 Swissprot&NR RecName: Full=G-type lectin S-receptor-like serine/threonine-protein kinase B120; Flags: Precursor EC:2.7.11.1
chr7H78118	-1.34533	3.45654e-13	GO:0005737,GO:0005885,GO:0051015,GO:0030833,GO:0034314 Refseq&Swissprot&NR actin-related protein 2/3 complex subunit 3 NULL
chr7H78152	-1.30117	2.11618e-11	na
chr7H78168	-0.661957	2.8777e-11	GO:0006952 NR putative disease resistance protein RGA1 NULL
