# Supplementary material for: A barley pan-transcriptome reveals layers of genotype-dependent transcriptional complexity
Source: Research Square preprint supplement (doi:10.21203/rs.3.rs-3787876/v1), 2024-01-08
Supplement: Supplementary file 6 [file 83f425b0ec568bec9fdf045a.xlsx]

## Sheet: Sheet1
Supplementary Data 4 Alternative splicing events for highly expressed transcripts from core-single-copy genes (average TPM > 10)
chr1H	PanBaRT20_trans_aveTPM10.gtf	exon	7216579	7216679	.	+	.	gene_id "A3:chr1H:7216679-7216982:7216679-7216985:+"; transcript_id "A3:chr1H:7216679-7216982:7216679-7216985:+:alternative1";
chr1H	PanBaRT20_trans_aveTPM10.gtf	exon	7216982	7217085	.	+	.	gene_id "A3:chr1H:7216679-7216982:7216679-7216985:+"; transcript_id "A3:chr1H:7216679-7216982:7216679-7216985:+:alternative1";
chr1H	PanBaRT20_trans_aveTPM10.gtf	exon	7216579	7216679	.	+	.	gene_id "A3:chr1H:7216679-7216982:7216679-7216985:+"; transcript_id "A3:chr1H:7216679-7216982:7216679-7216985:+:alternative2";
chr1H	PanBaRT20_trans_aveTPM10.gtf	exon	7216985	7217085	.	+	.	gene_id "A3:chr1H:7216679-7216982:7216679-7216985:+"; transcript_id "A3:chr1H:7216679-7216982:7216679-7216985:+:alternative2";
chr1H	PanBaRT20_trans_aveTPM10.gtf	exon	7272734	7272834	.	+	.	gene_id "A3:chr1H:7272834-7273137:7272834-7273140:+"; transcript_id "A3:chr1H:7272834-7273137:7272834-7273140:+:alternative1";
chr1H	PanBaRT20_trans_aveTPM10.gtf	exon	7273137	7273240	.	+	.	gene_id "A3:chr1H:7272834-7273137:7272834-7273140:+"; transcript_id "A3:chr1H:7272834-7273137:7272834-7273140:+:alternative1";
chr1H	PanBaRT20_trans_aveTPM10.gtf	exon	7272734	7272834	.	+	.	gene_id "A3:chr1H:7272834-7273137:7272834-7273140:+"; transcript_id "A3:chr1H:7272834-7273137:7272834-7273140:+:alternative2";
chr1H	PanBaRT20_trans_aveTPM10.gtf	exon	7273140	7273240	.	+	.	gene_id "A3:chr1H:7272834-7273137:7272834-7273140:+"; transcript_id "A3:chr1H:7272834-7273137:7272834-7273140:+:alternative2";
chr1H	PanBaRT20_trans_aveTPM10.gtf	exon	10852698	10852798	.	+	.	gene_id "A3:chr1H:10852798-10852909:10852798-10852937:+"; transcript_id "A3:chr1H:10852798-10852909:10852798-10852937:+:alternative1";
chr1H	PanBaRT20_trans_aveTPM10.gtf	exon	10852909	10853037	.	+	.	gene_id "A3:chr1H:10852798-10852909:10852798-10852937:+"; transcript_id "A3:chr1H:10852798-10852909:10852798-10852937:+:alternative1";
chr1H	PanBaRT20_trans_aveTPM10.gtf	exon	10852698	10852798	.	+	.	gene_id "A3:chr1H:10852798-10852909:10852798-10852937:+"; transcript_id "A3:chr1H:10852798-10852909:10852798-10852937:+:alternative2";
chr1H	PanBaRT20_trans_aveTPM10.gtf	exon	10852937	10853037	.	+	.	gene_id "A3:chr1H:10852798-10852909:10852798-10852937:+"; transcript_id "A3:chr1H:10852798-10852909:10852798-10852937:+:alternative2";
chr1H	PanBaRT20_trans_aveTPM10.gtf	exon	13810287	13810387	.	+	.	gene_id "A3:chr1H:13810387-13810434:13810387-13810905:+"; transcript_id "A3:chr1H:13810387-13810434:13810387-13810905:+:alternative1";
chr1H	PanBaRT20_trans_aveTPM10.gtf	exon	13810434	13811005	.	+	.	gene_id "A3:chr1H:13810387-13810434:13810387-13810905:+"; transcript_id "A3:chr1H:13810387-13810434:13810387-13810905:+:alternative1";
chr1H	PanBaRT20_trans_aveTPM10.gtf	exon	13810287	13810387	.	+	.	gene_id "A3:chr1H:13810387-13810434:13810387-13810905:+"; transcript_id "A3:chr1H:13810387-13810434:13810387-13810905:+:alternative2";
chr1H	PanBaRT20_trans_aveTPM10.gtf	exon	13810905	13811005	.	+	.	gene_id "A3:chr1H:13810387-13810434:13810387-13810905:+"; transcript_id "A3:chr1H:13810387-13810434:13810387-13810905:+:alternative2";
chr1H	PanBaRT20_trans_aveTPM10.gtf	exon	114776649	114776749	.	+	.	gene_id "A3:chr1H:114776749-114777313:114776749-114777317:+"; transcript_id "A3:chr1H:114776749-114777313:114776749-114777317:+:alternative1";
chr1H	PanBaRT20_trans_aveTPM10.gtf	exon	114777313	114777417	.	+	.	gene_id "A3:chr1H:114776749-114777313:114776749-114777317:+"; transcript_id "A3:chr1H:114776749-114777313:114776749-114777317:+:alternative1";
chr1H	PanBaRT20_trans_aveTPM10.gtf	exon	114776649	114776749	.	+	.	gene_id "A3:chr1H:114776749-114777313:114776749-114777317:+"; transcript_id "A3:chr1H:114776749-114777313:114776749-114777317:+:alternative2";
chr1H	PanBaRT20_trans_aveTPM10.gtf	exon	114777317	114777417	.	+	.	gene_id "A3:chr1H:114776749-114777313:114776749-114777317:+"; transcript_id "A3:chr1H:114776749-114777313:114776749-114777317:+:alternative2";
chr1H	PanBaRT20_trans_aveTPM10.gtf	exon	377309319	377309419	.	+	.	gene_id "A3:chr1H:377309419-377309491:377309419-377309720:+"; transcript_id "A3:chr1H:377309419-377309491:377309419-377309720:+:alternative1";
chr1H	PanBaRT20_trans_aveTPM10.gtf	exon	377309491	377309820	.	+	.	gene_id "A3:chr1H:377309419-377309491:377309419-377309720:+"; transcript_id "A3:chr1H:377309419-377309491:377309419-377309720:+:alternative1";
chr1H	PanBaRT20_trans_aveTPM10.gtf	exon	377309319	377309419	.	+	.	gene_id "A3:chr1H:377309419-377309491:377309419-377309720:+"; transcript_id "A3:chr1H:377309419-377309491:377309419-377309720:+:alternative2";
chr1H	PanBaRT20_trans_aveTPM10.gtf	exon	377309720	377309820	.	+	.	gene_id "A3:chr1H:377309419-377309491:377309419-377309720:+"; transcript_id "A3:chr1H:377309419-377309491:377309419-377309720:+:alternative2";
chr1H	PanBaRT20_trans_aveTPM10.gtf	exon	380299422	380299522	.	+	.	gene_id "A3:chr1H:380299522-380299677:380299522-380299695:+"; transcript_id "A3:chr1H:380299522-380299677:380299522-380299695:+:alternative1";
chr1H	PanBaRT20_trans_aveTPM10.gtf	exon	380299677	380299795	.	+	.	gene_id "A3:chr1H:380299522-380299677:380299522-380299695:+"; transcript_id "A3:chr1H:380299522-380299677:380299522-380299695:+:alternative1";
chr1H	PanBaRT20_trans_aveTPM10.gtf	exon	380299422	380299522	.	+	.	gene_id "A3:chr1H:380299522-380299677:380299522-380299695:+"; transcript_id "A3:chr1H:380299522-380299677:380299522-380299695:+:alternative2";
chr1H	PanBaRT20_trans_aveTPM10.gtf	exon	380299695	380299795	.	+	.	gene_id "A3:chr1H:380299522-380299677:380299522-380299695:+"; transcript_id "A3:chr1H:380299522-380299677:380299522-380299695:+:alternative2";
chr1H	PanBaRT20_trans_aveTPM10.gtf	exon	436276927	436277027	.	+	.	gene_id "A3:chr1H:436277027-436278104:436277027-436278109:+"; transcript_id "A3:chr1H:436277027-436278104:436277027-436278109:+:alternative1";
chr1H	PanBaRT20_trans_aveTPM10.gtf	exon	436278104	436278209	.	+	.	gene_id "A3:chr1H:436277027-436278104:436277027-436278109:+"; transcript_id "A3:chr1H:436277027-436278104:436277027-436278109:+:alternative1";
chr1H	PanBaRT20_trans_aveTPM10.gtf	exon	436276927	436277027	.	+	.	gene_id "A3:chr1H:436277027-436278104:436277027-436278109:+"; transcript_id "A3:chr1H:436277027-436278104:436277027-436278109:+:alternative2";
chr1H	PanBaRT20_trans_aveTPM10.gtf	exon	436278109	436278209	.	+	.	gene_id "A3:chr1H:436277027-436278104:436277027-436278109:+"; transcript_id "A3:chr1H:436277027-436278104:436277027-436278109:+:alternative2";
chr1H	PanBaRT20_trans_aveTPM10.gtf	exon	466088751	466088851	.	+	.	gene_id "A3:chr1H:466088851-466089428:466088851-466089437:+"; transcript_id "A3:chr1H:466088851-466089428:466088851-466089437:+:alternative1";
chr1H	PanBaRT20_trans_aveTPM10.gtf	exon	466089428	466089537	.	+	.	gene_id "A3:chr1H:466088851-466089428:466088851-466089437:+"; transcript_id "A3:chr1H:466088851-466089428:466088851-466089437:+:alternative1";
chr1H	PanBaRT20_trans_aveTPM10.gtf	exon	466088751	466088851	.	+	.	gene_id "A3:chr1H:466088851-466089428:466088851-466089437:+"; transcript_id "A3:chr1H:466088851-466089428:466088851-466089437:+:alternative2";
chr1H	PanBaRT20_trans_aveTPM10.gtf	exon	466089437	466089537	.	+	.	gene_id "A3:chr1H:466088851-466089428:466088851-466089437:+"; transcript_id "A3:chr1H:466088851-466089428:466088851-466089437:+:alternative2";
chr1H	PanBaRT20_trans_aveTPM10.gtf	exon	480715929	480716029	.	+	.	gene_id "A3:chr1H:480716029-480716110:480716029-480716119:+"; transcript_id "A3:chr1H:480716029-480716110:480716029-480716119:+:alternative1";
chr1H	PanBaRT20_trans_aveTPM10.gtf	exon	480716110	480716219	.	+	.	gene_id "A3:chr1H:480716029-480716110:480716029-480716119:+"; transcript_id "A3:chr1H:480716029-480716110:480716029-480716119:+:alternative1";
chr1H	PanBaRT20_trans_aveTPM10.gtf	exon	480715929	480716029	.	+	.	gene_id "A3:chr1H:480716029-480716110:480716029-480716119:+"; transcript_id "A3:chr1H:480716029-480716110:480716029-480716119:+:alternative2";
chr1H	PanBaRT20_trans_aveTPM10.gtf	exon	480716119	480716219	.	+	.	gene_id "A3:chr1H:480716029-480716110:480716029-480716119:+"; transcript_id "A3:chr1H:480716029-480716110:480716029-480716119:+:alternative2";
chr1H	PanBaRT20_trans_aveTPM10.gtf	exon	493651029	493651129	.	+	.	gene_id "A3:chr1H:493651129-493652094:493651129-493652099:+"; transcript_id "A3:chr1H:493651129-493652094:493651129-493652099:+:alternative1";
chr1H	PanBaRT20_trans_aveTPM10.gtf	exon	493652094	493652199	.	+	.	gene_id "A3:chr1H:493651129-493652094:493651129-493652099:+"; transcript_id "A3:chr1H:493651129-493652094:493651129-493652099:+:alternative1";
chr1H	PanBaRT20_trans_aveTPM10.gtf	exon	493651029	493651129	.	+	.	gene_id "A3:chr1H:493651129-493652094:493651129-493652099:+"; transcript_id "A3:chr1H:493651129-493652094:493651129-493652099:+:alternative2";
chr1H	PanBaRT20_trans_aveTPM10.gtf	exon	493652099	493652199	.	+	.	gene_id "A3:chr1H:493651129-493652094:493651129-493652099:+"; transcript_id "A3:chr1H:493651129-493652094:493651129-493652099:+:alternative2";
chr1H	PanBaRT20_trans_aveTPM10.gtf	exon	496763289	496763389	.	+	.	gene_id "A3:chr1H:496763389-496763472:496763389-496763502:+"; transcript_id "A3:chr1H:496763389-496763472:496763389-496763502:+:alternative1";
chr1H	PanBaRT20_trans_aveTPM10.gtf	exon	496763472	496763602	.	+	.	gene_id "A3:chr1H:496763389-496763472:496763389-496763502:+"; transcript_id "A3:chr1H:496763389-496763472:496763389-496763502:+:alternative1";
chr1H	PanBaRT20_trans_aveTPM10.gtf	exon	496763289	496763389	.	+	.	gene_id "A3:chr1H:496763389-496763472:496763389-496763502:+"; transcript_id "A3:chr1H:496763389-496763472:496763389-496763502:+:alternative2";
chr1H	PanBaRT20_trans_aveTPM10.gtf	exon	496763502	496763602	.	+	.	gene_id "A3:chr1H:496763389-496763472:496763389-496763502:+"; transcript_id "A3:chr1H:496763389-496763472:496763389-496763502:+:alternative2";
chr1H	PanBaRT20_trans_aveTPM10.gtf	exon	496766225	496766325	.	+	.	gene_id "A3:chr1H:496766325-496766451:496766325-496766487:+"; transcript_id "A3:chr1H:496766325-496766451:496766325-496766487:+:alternative1";
chr1H	PanBaRT20_trans_aveTPM10.gtf	exon	496766451	496766587	.	+	.	gene_id "A3:chr1H:496766325-496766451:496766325-496766487:+"; transcript_id "A3:chr1H:496766325-496766451:496766325-496766487:+:alternative1";
chr1H	PanBaRT20_trans_aveTPM10.gtf	exon	496766225	496766325	.	+	.	gene_id "A3:chr1H:496766325-496766451:496766325-496766487:+"; transcript_id "A3:chr1H:496766325-496766451:496766325-496766487:+:alternative2";
chr1H	PanBaRT20_trans_aveTPM10.gtf	exon	496766487	496766587	.	+	.	gene_id "A3:chr1H:496766325-496766451:496766325-496766487:+"; transcript_id "A3:chr1H:496766325-496766451:496766325-496766487:+:alternative2";
chr1H	PanBaRT20_trans_aveTPM10.gtf	exon	496766454	496766554	.	+	.	gene_id "A3:chr1H:496766554-496766901:496766554-496766904:+"; transcript_id "A3:chr1H:496766554-496766901:496766554-496766904:+:alternative1";
chr1H	PanBaRT20_trans_aveTPM10.gtf	exon	496766901	496767004	.	+	.	gene_id "A3:chr1H:496766554-496766901:496766554-496766904:+"; transcript_id "A3:chr1H:496766554-496766901:496766554-496766904:+:alternative1";
chr1H	PanBaRT20_trans_aveTPM10.gtf	exon	496766454	496766554	.	+	.	gene_id "A3:chr1H:496766554-496766901:496766554-496766904:+"; transcript_id "A3:chr1H:496766554-496766901:496766554-496766904:+:alternative2";
chr1H	PanBaRT20_trans_aveTPM10.gtf	exon	496766904	496767004	.	+	.	gene_id "A3:chr1H:496766554-496766901:496766554-496766904:+"; transcript_id "A3:chr1H:496766554-496766901:496766554-496766904:+:alternative2";
chr1H	PanBaRT20_trans_aveTPM10.gtf	exon	520211228	520211328	.	+	.	gene_id "A3:chr1H:520211328-520211552:520211328-520211558:+"; transcript_id "A3:chr1H:520211328-520211552:520211328-520211558:+:alternative1";
chr1H	PanBaRT20_trans_aveTPM10.gtf	exon	520211552	520211658	.	+	.	gene_id "A3:chr1H:520211328-520211552:520211328-520211558:+"; transcript_id "A3:chr1H:520211328-520211552:520211328-520211558:+:alternative1";
chr1H	PanBaRT20_trans_aveTPM10.gtf	exon	520211228	520211328	.	+	.	gene_id "A3:chr1H:520211328-520211552:520211328-520211558:+"; transcript_id "A3:chr1H:520211328-520211552:520211328-520211558:+:alternative2";
chr1H	PanBaRT20_trans_aveTPM10.gtf	exon	520211558	520211658	.	+	.	gene_id "A3:chr1H:520211328-520211552:520211328-520211558:+"; transcript_id "A3:chr1H:520211328-520211552:520211328-520211558:+:alternative2";
chr1H	PanBaRT20_trans_aveTPM10.gtf	exon	527583154	527583254	.	+	.	gene_id "A3:chr1H:527583254-527583746:527583254-527583766:+"; transcript_id "A3:chr1H:527583254-527583746:527583254-527583766:+:alternative1";
chr1H	PanBaRT20_trans_aveTPM10.gtf	exon	527583746	527583866	.	+	.	gene_id "A3:chr1H:527583254-527583746:527583254-527583766:+"; transcript_id "A3:chr1H:527583254-527583746:527583254-527583766:+:alternative1";
chr1H	PanBaRT20_trans_aveTPM10.gtf	exon	527583154	527583254	.	+	.	gene_id "A3:chr1H:527583254-527583746:527583254-527583766:+"; transcript_id "A3:chr1H:527583254-527583746:527583254-527583766:+:alternative2";
chr1H	PanBaRT20_trans_aveTPM10.gtf	exon	527583766	527583866	.	+	.	gene_id "A3:chr1H:527583254-527583746:527583254-527583766:+"; transcript_id "A3:chr1H:527583254-527583746:527583254-527583766:+:alternative2";
chr1H	PanBaRT20_trans_aveTPM10.gtf	exon	548253451	548253551	.	+	.	gene_id "A3:chr1H:548253551-548254034:548253551-548254043:+"; transcript_id "A3:chr1H:548253551-548254034:548253551-548254043:+:alternative1";
chr1H	PanBaRT20_trans_aveTPM10.gtf	exon	548254034	548254143	.	+	.	gene_id "A3:chr1H:548253551-548254034:548253551-548254043:+"; transcript_id "A3:chr1H:548253551-548254034:548253551-548254043:+:alternative1";
chr1H	PanBaRT20_trans_aveTPM10.gtf	exon	548253451	548253551	.	+	.	gene_id "A3:chr1H:548253551-548254034:548253551-548254043:+"; transcript_id "A3:chr1H:548253551-548254034:548253551-548254043:+:alternative2";
chr1H	PanBaRT20_trans_aveTPM10.gtf	exon	548254043	548254143	.	+	.	gene_id "A3:chr1H:548253551-548254034:548253551-548254043:+"; transcript_id "A3:chr1H:548253551-548254034:548253551-548254043:+:alternative2";
chr1H	PanBaRT20_trans_aveTPM10.gtf	exon	549327847	549327947	.	+	.	gene_id "A3:chr1H:549327947-549328045:549327947-549328048:+"; transcript_id "A3:chr1H:549327947-549328045:549327947-549328048:+:alternative1";
chr1H	PanBaRT20_trans_aveTPM10.gtf	exon	549328045	549328148	.	+	.	gene_id "A3:chr1H:549327947-549328045:549327947-549328048:+"; transcript_id "A3:chr1H:549327947-549328045:549327947-549328048:+:alternative1";
chr1H	PanBaRT20_trans_aveTPM10.gtf	exon	549327847	549327947	.	+	.	gene_id "A3:chr1H:549327947-549328045:549327947-549328048:+"; transcript_id "A3:chr1H:549327947-549328045:549327947-549328048:+:alternative2";
chr1H	PanBaRT20_trans_aveTPM10.gtf	exon	549328048	549328148	.	+	.	gene_id "A3:chr1H:549327947-549328045:549327947-549328048:+"; transcript_id "A3:chr1H:549327947-549328045:549327947-549328048:+:alternative2";
chr1H	PanBaRT20_trans_aveTPM10.gtf	exon	6470320	6470423	.	-	.	gene_id "A3:chr1H:6470423-6471659:6470420-6471659:-"; transcript_id "A3:chr1H:6470423-6471659:6470420-6471659:-:alternative1";
chr1H	PanBaRT20_trans_aveTPM10.gtf	exon	6471659	6471759	.	-	.	gene_id "A3:chr1H:6470423-6471659:6470420-6471659:-"; transcript_id "A3:chr1H:6470423-6471659:6470420-6471659:-:alternative1";
chr1H	PanBaRT20_trans_aveTPM10.gtf	exon	6470320	6470420	.	-	.	gene_id "A3:chr1H:6470423-6471659:6470420-6471659:-"; transcript_id "A3:chr1H:6470423-6471659:6470420-6471659:-:alternative2";
chr1H	PanBaRT20_trans_aveTPM10.gtf	exon	6471659	6471759	.	-	.	gene_id "A3:chr1H:6470423-6471659:6470420-6471659:-"; transcript_id "A3:chr1H:6470423-6471659:6470420-6471659:-:alternative2";
chr1H	PanBaRT20_trans_aveTPM10.gtf	exon	107709571	107709681	.	-	.	gene_id "A3:chr1H:107709681-107709784:107709671-107709784:-"; transcript_id "A3:chr1H:107709681-107709784:107709671-107709784:-:alternative1";
chr1H	PanBaRT20_trans_aveTPM10.gtf	exon	107709784	107709884	.	-	.	gene_id "A3:chr1H:107709681-107709784:107709671-107709784:-"; transcript_id "A3:chr1H:107709681-107709784:107709671-107709784:-:alternative1";
chr1H	PanBaRT20_trans_aveTPM10.gtf	exon	107709571	107709671	.	-	.	gene_id "A3:chr1H:107709681-107709784:107709671-107709784:-"; transcript_id "A3:chr1H:107709681-107709784:107709671-107709784:-:alternative2";
chr1H	PanBaRT20_trans_aveTPM10.gtf	exon	107709784	107709884	.	-	.	gene_id "A3:chr1H:107709681-107709784:107709671-107709784:-"; transcript_id "A3:chr1H:107709681-107709784:107709671-107709784:-:alternative2";
chr1H	PanBaRT20_trans_aveTPM10.gtf	exon	200359072	200359179	.	-	.	gene_id "A3:chr1H:200359179-200359307:200359172-200359307:-"; transcript_id "A3:chr1H:200359179-200359307:200359172-200359307:-:alternative1";
chr1H	PanBaRT20_trans_aveTPM10.gtf	exon	200359307	200359407	.	-	.	gene_id "A3:chr1H:200359179-200359307:200359172-200359307:-"; transcript_id "A3:chr1H:200359179-200359307:200359172-200359307:-:alternative1";
chr1H	PanBaRT20_trans_aveTPM10.gtf	exon	200359072	200359172	.	-	.	gene_id "A3:chr1H:200359179-200359307:200359172-200359307:-"; transcript_id "A3:chr1H:200359179-200359307:200359172-200359307:-:alternative2";
chr1H	PanBaRT20_trans_aveTPM10.gtf	exon	200359307	200359407	.	-	.	gene_id "A3:chr1H:200359179-200359307:200359172-200359307:-"; transcript_id "A3:chr1H:200359179-200359307:200359172-200359307:-:alternative2";
chr1H	PanBaRT20_trans_aveTPM10.gtf	exon	413724495	413724604	.	-	.	gene_id "A3:chr1H:413724604-413726677:413724595-413726677:-"; transcript_id "A3:chr1H:413724604-413726677:413724595-413726677:-:alternative1";
chr1H	PanBaRT20_trans_aveTPM10.gtf	exon	413726677	413726777	.	-	.	gene_id "A3:chr1H:413724604-413726677:413724595-413726677:-"; transcript_id "A3:chr1H:413724604-413726677:413724595-413726677:-:alternative1";
chr1H	PanBaRT20_trans_aveTPM10.gtf	exon	413724495	413724595	.	-	.	gene_id "A3:chr1H:413724604-413726677:413724595-413726677:-"; transcript_id "A3:chr1H:413724604-413726677:413724595-413726677:-:alternative2";
chr1H	PanBaRT20_trans_aveTPM10.gtf	exon	413726677	413726777	.	-	.	gene_id "A3:chr1H:413724604-413726677:413724595-413726677:-"; transcript_id "A3:chr1H:413724604-413726677:413724595-413726677:-:alternative2";
chr1H	PanBaRT20_trans_aveTPM10.gtf	exon	448589168	448589271	.	-	.	gene_id "A3:chr1H:448589271-448590683:448589268-448590683:-"; transcript_id "A3:chr1H:448589271-448590683:448589268-448590683:-:alternative1";
chr1H	PanBaRT20_trans_aveTPM10.gtf	exon	448590683	448590783	.	-	.	gene_id "A3:chr1H:448589271-448590683:448589268-448590683:-"; transcript_id "A3:chr1H:448589271-448590683:448589268-448590683:-:alternative1";
chr1H	PanBaRT20_trans_aveTPM10.gtf	exon	448589168	448589268	.	-	.	gene_id "A3:chr1H:448589271-448590683:448589268-448590683:-"; transcript_id "A3:chr1H:448589271-448590683:448589268-448590683:-:alternative2";
chr1H	PanBaRT20_trans_aveTPM10.gtf	exon	448590683	448590783	.	-	.	gene_id "A3:chr1H:448589271-448590683:448589268-448590683:-"; transcript_id "A3:chr1H:448589271-448590683:448589268-448590683:-:alternative2";
chr1H	PanBaRT20_trans_aveTPM10.gtf	exon	479602564	479602667	.	-	.	gene_id "A3:chr1H:479602667-479602789:479602664-479602789:-"; transcript_id "A3:chr1H:479602667-479602789:479602664-479602789:-:alternative1";
chr1H	PanBaRT20_trans_aveTPM10.gtf	exon	479602789	479602889	.	-	.	gene_id "A3:chr1H:479602667-479602789:479602664-479602789:-"; transcript_id "A3:chr1H:479602667-479602789:479602664-479602789:-:alternative1";
chr1H	PanBaRT20_trans_aveTPM10.gtf	exon	479602564	479602664	.	-	.	gene_id "A3:chr1H:479602667-479602789:479602664-479602789:-"; transcript_id "A3:chr1H:479602667-479602789:479602664-479602789:-:alternative2";
chr1H	PanBaRT20_trans_aveTPM10.gtf	exon	479602789	479602889	.	-	.	gene_id "A3:chr1H:479602667-479602789:479602664-479602789:-"; transcript_id "A3:chr1H:479602667-479602789:479602664-479602789:-:alternative2";
chr1H	PanBaRT20_trans_aveTPM10.gtf	exon	525388567	525388670	.	-	.	gene_id "A3:chr1H:525388670-525388801:525388667-525388801:-"; transcript_id "A3:chr1H:525388670-525388801:525388667-525388801:-:alternative1";
chr1H	PanBaRT20_trans_aveTPM10.gtf	exon	525388801	525388901	.	-	.	gene_id "A3:chr1H:525388670-525388801:525388667-525388801:-"; transcript_id "A3:chr1H:525388670-525388801:525388667-525388801:-:alternative1";
chr1H	PanBaRT20_trans_aveTPM10.gtf	exon	525388567	525388667	.	-	.	gene_id "A3:chr1H:525388670-525388801:525388667-525388801:-"; transcript_id "A3:chr1H:525388670-525388801:525388667-525388801:-:alternative2";
chr1H	PanBaRT20_trans_aveTPM10.gtf	exon	525388801	525388901	.	-	.	gene_id "A3:chr1H:525388670-525388801:525388667-525388801:-"; transcript_id "A3:chr1H:525388670-525388801:525388667-525388801:-:alternative2";
chr1H	PanBaRT20_trans_aveTPM10.gtf	exon	540592015	540592247	.	-	.	gene_id "A3:chr1H:540592247-540592339:540592115-540592339:-"; transcript_id "A3:chr1H:540592247-540592339:540592115-540592339:-:alternative1";
chr1H	PanBaRT20_trans_aveTPM10.gtf	exon	540592339	540592439	.	-	.	gene_id "A3:chr1H:540592247-540592339:540592115-540592339:-"; transcript_id "A3:chr1H:540592247-540592339:540592115-540592339:-:alternative1";
chr1H	PanBaRT20_trans_aveTPM10.gtf	exon	540592015	540592115	.	-	.	gene_id "A3:chr1H:540592247-540592339:540592115-540592339:-"; transcript_id "A3:chr1H:540592247-540592339:540592115-540592339:-:alternative2";
chr1H	PanBaRT20_trans_aveTPM10.gtf	exon	540592339	540592439	.	-	.	gene_id "A3:chr1H:540592247-540592339:540592115-540592339:-"; transcript_id "A3:chr1H:540592247-540592339:540592115-540592339:-:alternative2";
chr1H	PanBaRT20_trans_aveTPM10.gtf	exon	546016143	546016262	.	-	.	gene_id "A3:chr1H:546016262-546016361:546016243-546016361:-"; transcript_id "A3:chr1H:546016262-546016361:546016243-546016361:-:alternative1";
chr1H	PanBaRT20_trans_aveTPM10.gtf	exon	546016361	546016461	.	-	.	gene_id "A3:chr1H:546016262-546016361:546016243-546016361:-"; transcript_id "A3:chr1H:546016262-546016361:546016243-546016361:-:alternative1";
chr1H	PanBaRT20_trans_aveTPM10.gtf	exon	546016143	546016243	.	-	.	gene_id "A3:chr1H:546016262-546016361:546016243-546016361:-"; transcript_id "A3:chr1H:546016262-546016361:546016243-546016361:-:alternative2";
chr1H	PanBaRT20_trans_aveTPM10.gtf	exon	546016361	546016461	.	-	.	gene_id "A3:chr1H:546016262-546016361:546016243-546016361:-"; transcript_id "A3:chr1H:546016262-546016361:546016243-546016361:-:alternative2";
chr2H	PanBaRT20_trans_aveTPM10.gtf	exon	46030278	46030395	.	-	.	gene_id "A3:chr2H:46030395-46030550:46030378-46030550:-"; transcript_id "A3:chr2H:46030395-46030550:46030378-46030550:-:alternative1";
chr2H	PanBaRT20_trans_aveTPM10.gtf	exon	46030550	46030650	.	-	.	gene_id "A3:chr2H:46030395-46030550:46030378-46030550:-"; transcript_id "A3:chr2H:46030395-46030550:46030378-46030550:-:alternative1";
chr2H	PanBaRT20_trans_aveTPM10.gtf	exon	46030278	46030378	.	-	.	gene_id "A3:chr2H:46030395-46030550:46030378-46030550:-"; transcript_id "A3:chr2H:46030395-46030550:46030378-46030550:-:alternative2";
chr2H	PanBaRT20_trans_aveTPM10.gtf	exon	46030550	46030650	.	-	.	gene_id "A3:chr2H:46030395-46030550:46030378-46030550:-"; transcript_id "A3:chr2H:46030395-46030550:46030378-46030550:-:alternative2";
chr2H	PanBaRT20_trans_aveTPM10.gtf	exon	64148576	64148940	.	-	.	gene_id "A3:chr2H:64148940-64150195:64148676-64150195:-"; transcript_id "A3:chr2H:64148940-64150195:64148676-64150195:-:alternative1";
chr2H	PanBaRT20_trans_aveTPM10.gtf	exon	64150195	64150295	.	-	.	gene_id "A3:chr2H:64148940-64150195:64148676-64150195:-"; transcript_id "A3:chr2H:64148940-64150195:64148676-64150195:-:alternative1";
chr2H	PanBaRT20_trans_aveTPM10.gtf	exon	64148576	64148676	.	-	.	gene_id "A3:chr2H:64148940-64150195:64148676-64150195:-"; transcript_id "A3:chr2H:64148940-64150195:64148676-64150195:-:alternative2";
chr2H	PanBaRT20_trans_aveTPM10.gtf	exon	64150195	64150295	.	-	.	gene_id "A3:chr2H:64148940-64150195:64148676-64150195:-"; transcript_id "A3:chr2H:64148940-64150195:64148676-64150195:-:alternative2";
chr2H	PanBaRT20_trans_aveTPM10.gtf	exon	65348251	65348439	.	-	.	gene_id "A3:chr2H:65348439-65348541:65348351-65348541:-"; transcript_id "A3:chr2H:65348439-65348541:65348351-65348541:-:alternative1";
chr2H	PanBaRT20_trans_aveTPM10.gtf	exon	65348541	65348641	.	-	.	gene_id "A3:chr2H:65348439-65348541:65348351-65348541:-"; transcript_id "A3:chr2H:65348439-65348541:65348351-65348541:-:alternative1";
chr2H	PanBaRT20_trans_aveTPM10.gtf	exon	65348251	65348351	.	-	.	gene_id "A3:chr2H:65348439-65348541:65348351-65348541:-"; transcript_id "A3:chr2H:65348439-65348541:65348351-65348541:-:alternative2";
chr2H	PanBaRT20_trans_aveTPM10.gtf	exon	65348541	65348641	.	-	.	gene_id "A3:chr2H:65348439-65348541:65348351-65348541:-"; transcript_id "A3:chr2H:65348439-65348541:65348351-65348541:-:alternative2";
chr2H	PanBaRT20_trans_aveTPM10.gtf	exon	73106403	73106508	.	-	.	gene_id "A3:chr2H:73106508-73106638:73106503-73106638:-"; transcript_id "A3:chr2H:73106508-73106638:73106503-73106638:-:alternative1";
chr2H	PanBaRT20_trans_aveTPM10.gtf	exon	73106638	73106738	.	-	.	gene_id "A3:chr2H:73106508-73106638:73106503-73106638:-"; transcript_id "A3:chr2H:73106508-73106638:73106503-73106638:-:alternative1";
chr2H	PanBaRT20_trans_aveTPM10.gtf	exon	73106403	73106503	.	-	.	gene_id "A3:chr2H:73106508-73106638:73106503-73106638:-"; transcript_id "A3:chr2H:73106508-73106638:73106503-73106638:-:alternative2";
chr2H	PanBaRT20_trans_aveTPM10.gtf	exon	73106638	73106738	.	-	.	gene_id "A3:chr2H:73106508-73106638:73106503-73106638:-"; transcript_id "A3:chr2H:73106508-73106638:73106503-73106638:-:alternative2";
chr2H	PanBaRT20_trans_aveTPM10.gtf	exon	82610152	82610267	.	-	.	gene_id "A3:chr2H:82610267-82611461:82610252-82611461:-"; transcript_id "A3:chr2H:82610267-82611461:82610252-82611461:-:alternative1";
chr2H	PanBaRT20_trans_aveTPM10.gtf	exon	82611461	82611561	.	-	.	gene_id "A3:chr2H:82610267-82611461:82610252-82611461:-"; transcript_id "A3:chr2H:82610267-82611461:82610252-82611461:-:alternative1";
chr2H	PanBaRT20_trans_aveTPM10.gtf	exon	82610152	82610252	.	-	.	gene_id "A3:chr2H:82610267-82611461:82610252-82611461:-"; transcript_id "A3:chr2H:82610267-82611461:82610252-82611461:-:alternative2";
chr2H	PanBaRT20_trans_aveTPM10.gtf	exon	82611461	82611561	.	-	.	gene_id "A3:chr2H:82610267-82611461:82610252-82611461:-"; transcript_id "A3:chr2H:82610267-82611461:82610252-82611461:-:alternative2";
chr2H	PanBaRT20_trans_aveTPM10.gtf	exon	97854220	97854339	.	-	.	gene_id "A3:chr2H:97854339-97854679:97854320-97854679:-"; transcript_id "A3:chr2H:97854339-97854679:97854320-97854679:-:alternative1";
chr2H	PanBaRT20_trans_aveTPM10.gtf	exon	97854679	97854779	.	-	.	gene_id "A3:chr2H:97854339-97854679:97854320-97854679:-"; transcript_id "A3:chr2H:97854339-97854679:97854320-97854679:-:alternative1";
chr2H	PanBaRT20_trans_aveTPM10.gtf	exon	97854220	97854320	.	-	.	gene_id "A3:chr2H:97854339-97854679:97854320-97854679:-"; transcript_id "A3:chr2H:97854339-97854679:97854320-97854679:-:alternative2";
chr2H	PanBaRT20_trans_aveTPM10.gtf	exon	97854679	97854779	.	-	.	gene_id "A3:chr2H:97854339-97854679:97854320-97854679:-"; transcript_id "A3:chr2H:97854339-97854679:97854320-97854679:-:alternative2";
chr2H	PanBaRT20_trans_aveTPM10.gtf	exon	340311726	340311919	.	-	.	gene_id "A3:chr2H:340311919-340312003:340311826-340312003:-"; transcript_id "A3:chr2H:340311919-340312003:340311826-340312003:-:alternative1";
chr2H	PanBaRT20_trans_aveTPM10.gtf	exon	340312003	340312103	.	-	.	gene_id "A3:chr2H:340311919-340312003:340311826-340312003:-"; transcript_id "A3:chr2H:340311919-340312003:340311826-340312003:-:alternative1";
chr2H	PanBaRT20_trans_aveTPM10.gtf	exon	340311726	340311826	.	-	.	gene_id "A3:chr2H:340311919-340312003:340311826-340312003:-"; transcript_id "A3:chr2H:340311919-340312003:340311826-340312003:-:alternative2";
chr2H	PanBaRT20_trans_aveTPM10.gtf	exon	340312003	340312103	.	-	.	gene_id "A3:chr2H:340311919-340312003:340311826-340312003:-"; transcript_id "A3:chr2H:340311919-340312003:340311826-340312003:-:alternative2";
chr2H	PanBaRT20_trans_aveTPM10.gtf	exon	430219344	430219481	.	-	.	gene_id "A3:chr2H:430219481-430220225:430219444-430220225:-"; transcript_id "A3:chr2H:430219481-430220225:430219444-430220225:-:alternative1";
chr2H	PanBaRT20_trans_aveTPM10.gtf	exon	430220225	430220325	.	-	.	gene_id "A3:chr2H:430219481-430220225:430219444-430220225:-"; transcript_id "A3:chr2H:430219481-430220225:430219444-430220225:-:alternative1";
chr2H	PanBaRT20_trans_aveTPM10.gtf	exon	430219344	430219444	.	-	.	gene_id "A3:chr2H:430219481-430220225:430219444-430220225:-"; transcript_id "A3:chr2H:430219481-430220225:430219444-430220225:-:alternative2";
chr2H	PanBaRT20_trans_aveTPM10.gtf	exon	430220225	430220325	.	-	.	gene_id "A3:chr2H:430219481-430220225:430219444-430220225:-"; transcript_id "A3:chr2H:430219481-430220225:430219444-430220225:-:alternative2";
chr2H	PanBaRT20_trans_aveTPM10.gtf	exon	454979811	454979914	.	-	.	gene_id "A3:chr2H:454979914-454980016:454979911-454980016:-"; transcript_id "A3:chr2H:454979914-454980016:454979911-454980016:-:alternative1";
chr2H	PanBaRT20_trans_aveTPM10.gtf	exon	454980016	454980116	.	-	.	gene_id "A3:chr2H:454979914-454980016:454979911-454980016:-"; transcript_id "A3:chr2H:454979914-454980016:454979911-454980016:-:alternative1";
chr2H	PanBaRT20_trans_aveTPM10.gtf	exon	454979811	454979911	.	-	.	gene_id "A3:chr2H:454979914-454980016:454979911-454980016:-"; transcript_id "A3:chr2H:454979914-454980016:454979911-454980016:-:alternative2";
chr2H	PanBaRT20_trans_aveTPM10.gtf	exon	454980016	454980116	.	-	.	gene_id "A3:chr2H:454979914-454980016:454979911-454980016:-"; transcript_id "A3:chr2H:454979914-454980016:454979911-454980016:-:alternative2";
chr2H	PanBaRT20_trans_aveTPM10.gtf	exon	524554856	524554962	.	-	.	gene_id "A3:chr2H:524554962-524555824:524554956-524555824:-"; transcript_id "A3:chr2H:524554962-524555824:524554956-524555824:-:alternative1";
chr2H	PanBaRT20_trans_aveTPM10.gtf	exon	524555824	524555924	.	-	.	gene_id "A3:chr2H:524554962-524555824:524554956-524555824:-"; transcript_id "A3:chr2H:524554962-524555824:524554956-524555824:-:alternative1";
chr2H	PanBaRT20_trans_aveTPM10.gtf	exon	524554856	524554956	.	-	.	gene_id "A3:chr2H:524554962-524555824:524554956-524555824:-"; transcript_id "A3:chr2H:524554962-524555824:524554956-524555824:-:alternative2";
chr2H	PanBaRT20_trans_aveTPM10.gtf	exon	524555824	524555924	.	-	.	gene_id "A3:chr2H:524554962-524555824:524554956-524555824:-"; transcript_id "A3:chr2H:524554962-524555824:524554956-524555824:-:alternative2";
chr2H	PanBaRT20_trans_aveTPM10.gtf	exon	530390022	530390125	.	-	.	gene_id "A3:chr2H:530390125-530390725:530390122-530390725:-"; transcript_id "A3:chr2H:530390125-530390725:530390122-530390725:-:alternative1";
chr2H	PanBaRT20_trans_aveTPM10.gtf	exon	530390725	530390825	.	-	.	gene_id "A3:chr2H:530390125-530390725:530390122-530390725:-"; transcript_id "A3:chr2H:530390125-530390725:530390122-530390725:-:alternative1";
chr2H	PanBaRT20_trans_aveTPM10.gtf	exon	530390022	530390122	.	-	.	gene_id "A3:chr2H:530390125-530390725:530390122-530390725:-"; transcript_id "A3:chr2H:530390125-530390725:530390122-530390725:-:alternative2";
chr2H	PanBaRT20_trans_aveTPM10.gtf	exon	530390725	530390825	.	-	.	gene_id "A3:chr2H:530390125-530390725:530390122-530390725:-"; transcript_id "A3:chr2H:530390125-530390725:530390122-530390725:-:alternative2";
chr2H	PanBaRT20_trans_aveTPM10.gtf	exon	566311769	566311889	.	-	.	gene_id "A3:chr2H:566311889-566311977:566311869-566311977:-"; transcript_id "A3:chr2H:566311889-566311977:566311869-566311977:-:alternative1";
chr2H	PanBaRT20_trans_aveTPM10.gtf	exon	566311977	566312077	.	-	.	gene_id "A3:chr2H:566311889-566311977:566311869-566311977:-"; transcript_id "A3:chr2H:566311889-566311977:566311869-566311977:-:alternative1";
chr2H	PanBaRT20_trans_aveTPM10.gtf	exon	566311769	566311869	.	-	.	gene_id "A3:chr2H:566311889-566311977:566311869-566311977:-"; transcript_id "A3:chr2H:566311889-566311977:566311869-566311977:-:alternative2";
chr2H	PanBaRT20_trans_aveTPM10.gtf	exon	566311977	566312077	.	-	.	gene_id "A3:chr2H:566311889-566311977:566311869-566311977:-"; transcript_id "A3:chr2H:566311889-566311977:566311869-566311977:-:alternative2";
chr2H	PanBaRT20_trans_aveTPM10.gtf	exon	572872662	572872765	.	-	.	gene_id "A3:chr2H:572872765-572874826:572872762-572874826:-"; transcript_id "A3:chr2H:572872765-572874826:572872762-572874826:-:alternative1";
chr2H	PanBaRT20_trans_aveTPM10.gtf	exon	572874826	572874926	.	-	.	gene_id "A3:chr2H:572872765-572874826:572872762-572874826:-"; transcript_id "A3:chr2H:572872765-572874826:572872762-572874826:-:alternative1";
chr2H	PanBaRT20_trans_aveTPM10.gtf	exon	572872662	572872762	.	-	.	gene_id "A3:chr2H:572872765-572874826:572872762-572874826:-"; transcript_id "A3:chr2H:572872765-572874826:572872762-572874826:-:alternative2";
chr2H	PanBaRT20_trans_aveTPM10.gtf	exon	572874826	572874926	.	-	.	gene_id "A3:chr2H:572872765-572874826:572872762-572874826:-"; transcript_id "A3:chr2H:572872765-572874826:572872762-572874826:-:alternative2";
chr2H	PanBaRT20_trans_aveTPM10.gtf	exon	591335752	591335942	.	-	.	gene_id "A3:chr2H:591335942-591336026:591335852-591336026:-"; transcript_id "A3:chr2H:591335942-591336026:591335852-591336026:-:alternative1";
chr2H	PanBaRT20_trans_aveTPM10.gtf	exon	591336026	591336126	.	-	.	gene_id "A3:chr2H:591335942-591336026:591335852-591336026:-"; transcript_id "A3:chr2H:591335942-591336026:591335852-591336026:-:alternative1";
chr2H	PanBaRT20_trans_aveTPM10.gtf	exon	591335752	591335852	.	-	.	gene_id "A3:chr2H:591335942-591336026:591335852-591336026:-"; transcript_id "A3:chr2H:591335942-591336026:591335852-591336026:-:alternative2";
chr2H	PanBaRT20_trans_aveTPM10.gtf	exon	591336026	591336126	.	-	.	gene_id "A3:chr2H:591335942-591336026:591335852-591336026:-"; transcript_id "A3:chr2H:591335942-591336026:591335852-591336026:-:alternative2";
chr2H	PanBaRT20_trans_aveTPM10.gtf	exon	632221724	632221858	.	-	.	gene_id "A3:chr2H:632221858-632221959:632221824-632221959:-"; transcript_id "A3:chr2H:632221858-632221959:632221824-632221959:-:alternative1";
chr2H	PanBaRT20_trans_aveTPM10.gtf	exon	632221959	632222059	.	-	.	gene_id "A3:chr2H:632221858-632221959:632221824-632221959:-"; transcript_id "A3:chr2H:632221858-632221959:632221824-632221959:-:alternative1";
chr2H	PanBaRT20_trans_aveTPM10.gtf	exon	632221724	632221824	.	-	.	gene_id "A3:chr2H:632221858-632221959:632221824-632221959:-"; transcript_id "A3:chr2H:632221858-632221959:632221824-632221959:-:alternative2";
chr2H	PanBaRT20_trans_aveTPM10.gtf	exon	632221959	632222059	.	-	.	gene_id "A3:chr2H:632221858-632221959:632221824-632221959:-"; transcript_id "A3:chr2H:632221858-632221959:632221824-632221959:-:alternative2";
chr2H	PanBaRT20_trans_aveTPM10.gtf	exon	690421170	690421276	.	-	.	gene_id "A3:chr2H:690421276-690421373:690421270-690421373:-"; transcript_id "A3:chr2H:690421276-690421373:690421270-690421373:-:alternative1";
chr2H	PanBaRT20_trans_aveTPM10.gtf	exon	690421373	690421473	.	-	.	gene_id "A3:chr2H:690421276-690421373:690421270-690421373:-"; transcript_id "A3:chr2H:690421276-690421373:690421270-690421373:-:alternative1";
chr2H	PanBaRT20_trans_aveTPM10.gtf	exon	690421170	690421270	.	-	.	gene_id "A3:chr2H:690421276-690421373:690421270-690421373:-"; transcript_id "A3:chr2H:690421276-690421373:690421270-690421373:-:alternative2";
chr2H	PanBaRT20_trans_aveTPM10.gtf	exon	690421373	690421473	.	-	.	gene_id "A3:chr2H:690421276-690421373:690421270-690421373:-"; transcript_id "A3:chr2H:690421276-690421373:690421270-690421373:-:alternative2";
chr2H	PanBaRT20_trans_aveTPM10.gtf	exon	690815783	690815911	.	-	.	gene_id "A3:chr2H:690815911-690815989:690815883-690815989:-"; transcript_id "A3:chr2H:690815911-690815989:690815883-690815989:-:alternative1";
chr2H	PanBaRT20_trans_aveTPM10.gtf	exon	690815989	690816089	.	-	.	gene_id "A3:chr2H:690815911-690815989:690815883-690815989:-"; transcript_id "A3:chr2H:690815911-690815989:690815883-690815989:-:alternative1";
chr2H	PanBaRT20_trans_aveTPM10.gtf	exon	690815783	690815883	.	-	.	gene_id "A3:chr2H:690815911-690815989:690815883-690815989:-"; transcript_id "A3:chr2H:690815911-690815989:690815883-690815989:-:alternative2";
chr2H	PanBaRT20_trans_aveTPM10.gtf	exon	690815989	690816089	.	-	.	gene_id "A3:chr2H:690815911-690815989:690815883-690815989:-"; transcript_id "A3:chr2H:690815911-690815989:690815883-690815989:-:alternative2";
chr2H	PanBaRT20_trans_aveTPM10.gtf	exon	718755065	718755168	.	-	.	gene_id "A3:chr2H:718755168-718755270:718755165-718755270:-"; transcript_id "A3:chr2H:718755168-718755270:718755165-718755270:-:alternative1";
chr2H	PanBaRT20_trans_aveTPM10.gtf	exon	718755270	718755370	.	-	.	gene_id "A3:chr2H:718755168-718755270:718755165-718755270:-"; transcript_id "A3:chr2H:718755168-718755270:718755165-718755270:-:alternative1";
chr2H	PanBaRT20_trans_aveTPM10.gtf	exon	718755065	718755165	.	-	.	gene_id "A3:chr2H:718755168-718755270:718755165-718755270:-"; transcript_id "A3:chr2H:718755168-718755270:718755165-718755270:-:alternative2";
chr2H	PanBaRT20_trans_aveTPM10.gtf	exon	718755270	718755370	.	-	.	gene_id "A3:chr2H:718755168-718755270:718755165-718755270:-"; transcript_id "A3:chr2H:718755168-718755270:718755165-718755270:-:alternative2";
chr2H	PanBaRT20_trans_aveTPM10.gtf	exon	12920012	12920112	.	+	.	gene_id "A3:chr2H:12920112-12921941:12920112-12922336:+"; transcript_id "A3:chr2H:12920112-12921941:12920112-12922336:+:alternative1";
chr2H	PanBaRT20_trans_aveTPM10.gtf	exon	12921941	12922436	.	+	.	gene_id "A3:chr2H:12920112-12921941:12920112-12922336:+"; transcript_id "A3:chr2H:12920112-12921941:12920112-12922336:+:alternative1";
chr2H	PanBaRT20_trans_aveTPM10.gtf	exon	12920012	12920112	.	+	.	gene_id "A3:chr2H:12920112-12921941:12920112-12922336:+"; transcript_id "A3:chr2H:12920112-12921941:12920112-12922336:+:alternative2";
chr2H	PanBaRT20_trans_aveTPM10.gtf	exon	12922336	12922436	.	+	.	gene_id "A3:chr2H:12920112-12921941:12920112-12922336:+"; transcript_id "A3:chr2H:12920112-12921941:12920112-12922336:+:alternative2";
chr2H	PanBaRT20_trans_aveTPM10.gtf	exon	17021805	17021905	.	+	.	gene_id "A3:chr2H:17021905-17022006:17021905-17022015:+"; transcript_id "A3:chr2H:17021905-17022006:17021905-17022015:+:alternative1";
chr2H	PanBaRT20_trans_aveTPM10.gtf	exon	17022006	17022115	.	+	.	gene_id "A3:chr2H:17021905-17022006:17021905-17022015:+"; transcript_id "A3:chr2H:17021905-17022006:17021905-17022015:+:alternative1";
chr2H	PanBaRT20_trans_aveTPM10.gtf	exon	17021805	17021905	.	+	.	gene_id "A3:chr2H:17021905-17022006:17021905-17022015:+"; transcript_id "A3:chr2H:17021905-17022006:17021905-17022015:+:alternative2";
chr2H	PanBaRT20_trans_aveTPM10.gtf	exon	17022015	17022115	.	+	.	gene_id "A3:chr2H:17021905-17022006:17021905-17022015:+"; transcript_id "A3:chr2H:17021905-17022006:17021905-17022015:+:alternative2";
chr2H	PanBaRT20_trans_aveTPM10.gtf	exon	20925935	20926035	.	+	.	gene_id "A3:chr2H:20926035-20934089:20926035-20934118:+"; transcript_id "A3:chr2H:20926035-20934089:20926035-20934118:+:alternative1";
chr2H	PanBaRT20_trans_aveTPM10.gtf	exon	20934089	20934218	.	+	.	gene_id "A3:chr2H:20926035-20934089:20926035-20934118:+"; transcript_id "A3:chr2H:20926035-20934089:20926035-20934118:+:alternative1";
chr2H	PanBaRT20_trans_aveTPM10.gtf	exon	20925935	20926035	.	+	.	gene_id "A3:chr2H:20926035-20934089:20926035-20934118:+"; transcript_id "A3:chr2H:20926035-20934089:20926035-20934118:+:alternative2";
chr2H	PanBaRT20_trans_aveTPM10.gtf	exon	20934118	20934218	.	+	.	gene_id "A3:chr2H:20926035-20934089:20926035-20934118:+"; transcript_id "A3:chr2H:20926035-20934089:20926035-20934118:+:alternative2";
chr2H	PanBaRT20_trans_aveTPM10.gtf	exon	65874910	65875010	.	+	.	gene_id "A3:chr2H:65875010-65875141:65875010-65875151:+"; transcript_id "A3:chr2H:65875010-65875141:65875010-65875151:+:alternative1";
chr2H	PanBaRT20_trans_aveTPM10.gtf	exon	65875141	65875251	.	+	.	gene_id "A3:chr2H:65875010-65875141:65875010-65875151:+"; transcript_id "A3:chr2H:65875010-65875141:65875010-65875151:+:alternative1";
chr2H	PanBaRT20_trans_aveTPM10.gtf	exon	65874910	65875010	.	+	.	gene_id "A3:chr2H:65875010-65875141:65875010-65875151:+"; transcript_id "A3:chr2H:65875010-65875141:65875010-65875151:+:alternative2";
chr2H	PanBaRT20_trans_aveTPM10.gtf	exon	65875151	65875251	.	+	.	gene_id "A3:chr2H:65875010-65875141:65875010-65875151:+"; transcript_id "A3:chr2H:65875010-65875141:65875010-65875151:+:alternative2";
chr2H	PanBaRT20_trans_aveTPM10.gtf	exon	84410328	84410428	.	+	.	gene_id "A3:chr2H:84410428-84411614:84410428-84411617:+"; transcript_id "A3:chr2H:84410428-84411614:84410428-84411617:+:alternative1";
chr2H	PanBaRT20_trans_aveTPM10.gtf	exon	84411614	84411717	.	+	.	gene_id "A3:chr2H:84410428-84411614:84410428-84411617:+"; transcript_id "A3:chr2H:84410428-84411614:84410428-84411617:+:alternative1";
chr2H	PanBaRT20_trans_aveTPM10.gtf	exon	84410328	84410428	.	+	.	gene_id "A3:chr2H:84410428-84411614:84410428-84411617:+"; transcript_id "A3:chr2H:84410428-84411614:84410428-84411617:+:alternative2";
chr2H	PanBaRT20_trans_aveTPM10.gtf	exon	84411617	84411717	.	+	.	gene_id "A3:chr2H:84410428-84411614:84410428-84411617:+"; transcript_id "A3:chr2H:84410428-84411614:84410428-84411617:+:alternative2";
chr2H	PanBaRT20_trans_aveTPM10.gtf	exon	114766798	114766898	.	+	.	gene_id "A3:chr2H:114766898-114766996:114766898-114767000:+"; transcript_id "A3:chr2H:114766898-114766996:114766898-114767000:+:alternative1";
chr2H	PanBaRT20_trans_aveTPM10.gtf	exon	114766996	114767100	.	+	.	gene_id "A3:chr2H:114766898-114766996:114766898-114767000:+"; transcript_id "A3:chr2H:114766898-114766996:114766898-114767000:+:alternative1";
chr2H	PanBaRT20_trans_aveTPM10.gtf	exon	114766798	114766898	.	+	.	gene_id "A3:chr2H:114766898-114766996:114766898-114767000:+"; transcript_id "A3:chr2H:114766898-114766996:114766898-114767000:+:alternative2";
chr2H	PanBaRT20_trans_aveTPM10.gtf	exon	114767000	114767100	.	+	.	gene_id "A3:chr2H:114766898-114766996:114766898-114767000:+"; transcript_id "A3:chr2H:114766898-114766996:114766898-114767000:+:alternative2";
chr2H	PanBaRT20_trans_aveTPM10.gtf	exon	120974510	120974610	.	+	.	gene_id "A3:chr2H:120974610-120975401:120974610-120975584:+"; transcript_id "A3:chr2H:120974610-120975401:120974610-120975584:+:alternative1";
chr2H	PanBaRT20_trans_aveTPM10.gtf	exon	120975401	120975684	.	+	.	gene_id "A3:chr2H:120974610-120975401:120974610-120975584:+"; transcript_id "A3:chr2H:120974610-120975401:120974610-120975584:+:alternative1";
chr2H	PanBaRT20_trans_aveTPM10.gtf	exon	120974510	120974610	.	+	.	gene_id "A3:chr2H:120974610-120975401:120974610-120975584:+"; transcript_id "A3:chr2H:120974610-120975401:120974610-120975584:+:alternative2";
chr2H	PanBaRT20_trans_aveTPM10.gtf	exon	120975584	120975684	.	+	.	gene_id "A3:chr2H:120974610-120975401:120974610-120975584:+"; transcript_id "A3:chr2H:120974610-120975401:120974610-120975584:+:alternative2";
chr2H	PanBaRT20_trans_aveTPM10.gtf	exon	237391765	237391865	.	+	.	gene_id "A3:chr2H:237391865-237392948:237391865-237392951:+"; transcript_id "A3:chr2H:237391865-237392948:237391865-237392951:+:alternative1";
chr2H	PanBaRT20_trans_aveTPM10.gtf	exon	237392948	237393051	.	+	.	gene_id "A3:chr2H:237391865-237392948:237391865-237392951:+"; transcript_id "A3:chr2H:237391865-237392948:237391865-237392951:+:alternative1";
chr2H	PanBaRT20_trans_aveTPM10.gtf	exon	237391765	237391865	.	+	.	gene_id "A3:chr2H:237391865-237392948:237391865-237392951:+"; transcript_id "A3:chr2H:237391865-237392948:237391865-237392951:+:alternative2";
chr2H	PanBaRT20_trans_aveTPM10.gtf	exon	237392951	237393051	.	+	.	gene_id "A3:chr2H:237391865-237392948:237391865-237392951:+"; transcript_id "A3:chr2H:237391865-237392948:237391865-237392951:+:alternative2";
chr2H	PanBaRT20_trans_aveTPM10.gtf	exon	394798018	394798118	.	+	.	gene_id "A3:chr2H:394798118-394802272:394798118-394802275:+"; transcript_id "A3:chr2H:394798118-394802272:394798118-394802275:+:alternative1";
chr2H	PanBaRT20_trans_aveTPM10.gtf	exon	394802272	394802375	.	+	.	gene_id "A3:chr2H:394798118-394802272:394798118-394802275:+"; transcript_id "A3:chr2H:394798118-394802272:394798118-394802275:+:alternative1";
chr2H	PanBaRT20_trans_aveTPM10.gtf	exon	394798018	394798118	.	+	.	gene_id "A3:chr2H:394798118-394802272:394798118-394802275:+"; transcript_id "A3:chr2H:394798118-394802272:394798118-394802275:+:alternative2";
chr2H	PanBaRT20_trans_aveTPM10.gtf	exon	394802275	394802375	.	+	.	gene_id "A3:chr2H:394798118-394802272:394798118-394802275:+"; transcript_id "A3:chr2H:394798118-394802272:394798118-394802275:+:alternative2";
chr2H	PanBaRT20_trans_aveTPM10.gtf	exon	550246455	550246555	.	+	.	gene_id "A3:chr2H:550246555-550246674:550246555-550246677:+"; transcript_id "A3:chr2H:550246555-550246674:550246555-550246677:+:alternative1";
chr2H	PanBaRT20_trans_aveTPM10.gtf	exon	550246674	550246777	.	+	.	gene_id "A3:chr2H:550246555-550246674:550246555-550246677:+"; transcript_id "A3:chr2H:550246555-550246674:550246555-550246677:+:alternative1";
chr2H	PanBaRT20_trans_aveTPM10.gtf	exon	550246455	550246555	.	+	.	gene_id "A3:chr2H:550246555-550246674:550246555-550246677:+"; transcript_id "A3:chr2H:550246555-550246674:550246555-550246677:+:alternative2";
chr2H	PanBaRT20_trans_aveTPM10.gtf	exon	550246677	550246777	.	+	.	gene_id "A3:chr2H:550246555-550246674:550246555-550246677:+"; transcript_id "A3:chr2H:550246555-550246674:550246555-550246677:+:alternative2";
chr2H	PanBaRT20_trans_aveTPM10.gtf	exon	672499359	672499459	.	+	.	gene_id "A3:chr2H:672499459-672499550:672499459-672499558:+"; transcript_id "A3:chr2H:672499459-672499550:672499459-672499558:+:alternative1";
chr2H	PanBaRT20_trans_aveTPM10.gtf	exon	672499550	672499658	.	+	.	gene_id "A3:chr2H:672499459-672499550:672499459-672499558:+"; transcript_id "A3:chr2H:672499459-672499550:672499459-672499558:+:alternative1";
chr2H	PanBaRT20_trans_aveTPM10.gtf	exon	672499359	672499459	.	+	.	gene_id "A3:chr2H:672499459-672499550:672499459-672499558:+"; transcript_id "A3:chr2H:672499459-672499550:672499459-672499558:+:alternative2";
chr2H	PanBaRT20_trans_aveTPM10.gtf	exon	672499558	672499658	.	+	.	gene_id "A3:chr2H:672499459-672499550:672499459-672499558:+"; transcript_id "A3:chr2H:672499459-672499550:672499459-672499558:+:alternative2";
chr2H	PanBaRT20_trans_aveTPM10.gtf	exon	683472245	683472345	.	+	.	gene_id "A3:chr2H:683472345-683472471:683472345-683474560:+"; transcript_id "A3:chr2H:683472345-683472471:683472345-683474560:+:alternative1";
chr2H	PanBaRT20_trans_aveTPM10.gtf	exon	683472471	683474660	.	+	.	gene_id "A3:chr2H:683472345-683472471:683472345-683474560:+"; transcript_id "A3:chr2H:683472345-683472471:683472345-683474560:+:alternative1";
chr2H	PanBaRT20_trans_aveTPM10.gtf	exon	683472245	683472345	.	+	.	gene_id "A3:chr2H:683472345-683472471:683472345-683474560:+"; transcript_id "A3:chr2H:683472345-683472471:683472345-683474560:+:alternative2";
chr2H	PanBaRT20_trans_aveTPM10.gtf	exon	683474560	683474660	.	+	.	gene_id "A3:chr2H:683472345-683472471:683472345-683474560:+"; transcript_id "A3:chr2H:683472345-683472471:683472345-683474560:+:alternative2";
chr2H	PanBaRT20_trans_aveTPM10.gtf	exon	703970332	703970432	.	+	.	gene_id "A3:chr2H:703970432-703971040:703970432-703971049:+"; transcript_id "A3:chr2H:703970432-703971040:703970432-703971049:+:alternative1";
chr2H	PanBaRT20_trans_aveTPM10.gtf	exon	703971040	703971149	.	+	.	gene_id "A3:chr2H:703970432-703971040:703970432-703971049:+"; transcript_id "A3:chr2H:703970432-703971040:703970432-703971049:+:alternative1";
chr2H	PanBaRT20_trans_aveTPM10.gtf	exon	703970332	703970432	.	+	.	gene_id "A3:chr2H:703970432-703971040:703970432-703971049:+"; transcript_id "A3:chr2H:703970432-703971040:703970432-703971049:+:alternative2";
chr2H	PanBaRT20_trans_aveTPM10.gtf	exon	703971049	703971149	.	+	.	gene_id "A3:chr2H:703970432-703971040:703970432-703971049:+"; transcript_id "A3:chr2H:703970432-703971040:703970432-703971049:+:alternative2";
chr2H	PanBaRT20_trans_aveTPM10.gtf	exon	720903358	720903458	.	+	.	gene_id "A3:chr2H:720903458-720903588:720903458-720903606:+"; transcript_id "A3:chr2H:720903458-720903588:720903458-720903606:+:alternative1";
chr2H	PanBaRT20_trans_aveTPM10.gtf	exon	720903588	720903706	.	+	.	gene_id "A3:chr2H:720903458-720903588:720903458-720903606:+"; transcript_id "A3:chr2H:720903458-720903588:720903458-720903606:+:alternative1";
chr2H	PanBaRT20_trans_aveTPM10.gtf	exon	720903358	720903458	.	+	.	gene_id "A3:chr2H:720903458-720903588:720903458-720903606:+"; transcript_id "A3:chr2H:720903458-720903588:720903458-720903606:+:alternative2";
chr2H	PanBaRT20_trans_aveTPM10.gtf	exon	720903606	720903706	.	+	.	gene_id "A3:chr2H:720903458-720903588:720903458-720903606:+"; transcript_id "A3:chr2H:720903458-720903588:720903458-720903606:+:alternative2";
chr2H	PanBaRT20_trans_aveTPM10.gtf	exon	724631899	724631999	.	+	.	gene_id "A3:chr2H:724631999-724632358:724631999-724632362:+"; transcript_id "A3:chr2H:724631999-724632358:724631999-724632362:+:alternative1";
chr2H	PanBaRT20_trans_aveTPM10.gtf	exon	724632358	724632462	.	+	.	gene_id "A3:chr2H:724631999-724632358:724631999-724632362:+"; transcript_id "A3:chr2H:724631999-724632358:724631999-724632362:+:alternative1";
chr2H	PanBaRT20_trans_aveTPM10.gtf	exon	724631899	724631999	.	+	.	gene_id "A3:chr2H:724631999-724632358:724631999-724632362:+"; transcript_id "A3:chr2H:724631999-724632358:724631999-724632362:+:alternative2";
chr2H	PanBaRT20_trans_aveTPM10.gtf	exon	724632362	724632462	.	+	.	gene_id "A3:chr2H:724631999-724632358:724631999-724632362:+"; transcript_id "A3:chr2H:724631999-724632358:724631999-724632362:+:alternative2";
chr3H	PanBaRT20_trans_aveTPM10.gtf	exon	6735578	6735688	.	-	.	gene_id "A3:chr3H:6735688-6735819:6735678-6735819:-"; transcript_id "A3:chr3H:6735688-6735819:6735678-6735819:-:alternative1";
chr3H	PanBaRT20_trans_aveTPM10.gtf	exon	6735819	6735919	.	-	.	gene_id "A3:chr3H:6735688-6735819:6735678-6735819:-"; transcript_id "A3:chr3H:6735688-6735819:6735678-6735819:-:alternative1";
chr3H	PanBaRT20_trans_aveTPM10.gtf	exon	6735578	6735678	.	-	.	gene_id "A3:chr3H:6735688-6735819:6735678-6735819:-"; transcript_id "A3:chr3H:6735688-6735819:6735678-6735819:-:alternative2";
chr3H	PanBaRT20_trans_aveTPM10.gtf	exon	6735819	6735919	.	-	.	gene_id "A3:chr3H:6735688-6735819:6735678-6735819:-"; transcript_id "A3:chr3H:6735688-6735819:6735678-6735819:-:alternative2";
chr3H	PanBaRT20_trans_aveTPM10.gtf	exon	22891930	22892052	.	-	.	gene_id "A3:chr3H:22892052-22893437:22892030-22893437:-"; transcript_id "A3:chr3H:22892052-22893437:22892030-22893437:-:alternative1";
chr3H	PanBaRT20_trans_aveTPM10.gtf	exon	22893437	22893537	.	-	.	gene_id "A3:chr3H:22892052-22893437:22892030-22893437:-"; transcript_id "A3:chr3H:22892052-22893437:22892030-22893437:-:alternative1";
chr3H	PanBaRT20_trans_aveTPM10.gtf	exon	22891930	22892030	.	-	.	gene_id "A3:chr3H:22892052-22893437:22892030-22893437:-"; transcript_id "A3:chr3H:22892052-22893437:22892030-22893437:-:alternative2";
chr3H	PanBaRT20_trans_aveTPM10.gtf	exon	22893437	22893537	.	-	.	gene_id "A3:chr3H:22892052-22893437:22892030-22893437:-"; transcript_id "A3:chr3H:22892052-22893437:22892030-22893437:-:alternative2";
chr3H	PanBaRT20_trans_aveTPM10.gtf	exon	87425077	87425186	.	-	.	gene_id "A3:chr3H:87425186-87425322:87425177-87425322:-"; transcript_id "A3:chr3H:87425186-87425322:87425177-87425322:-:alternative1";
chr3H	PanBaRT20_trans_aveTPM10.gtf	exon	87425322	87425422	.	-	.	gene_id "A3:chr3H:87425186-87425322:87425177-87425322:-"; transcript_id "A3:chr3H:87425186-87425322:87425177-87425322:-:alternative1";
chr3H	PanBaRT20_trans_aveTPM10.gtf	exon	87425077	87425177	.	-	.	gene_id "A3:chr3H:87425186-87425322:87425177-87425322:-"; transcript_id "A3:chr3H:87425186-87425322:87425177-87425322:-:alternative2";
chr3H	PanBaRT20_trans_aveTPM10.gtf	exon	87425322	87425422	.	-	.	gene_id "A3:chr3H:87425186-87425322:87425177-87425322:-"; transcript_id "A3:chr3H:87425186-87425322:87425177-87425322:-:alternative2";
chr3H	PanBaRT20_trans_aveTPM10.gtf	exon	153769697	153769802	.	-	.	gene_id "A3:chr3H:153769802-153769903:153769797-153769903:-"; transcript_id "A3:chr3H:153769802-153769903:153769797-153769903:-:alternative1";
chr3H	PanBaRT20_trans_aveTPM10.gtf	exon	153769903	153770003	.	-	.	gene_id "A3:chr3H:153769802-153769903:153769797-153769903:-"; transcript_id "A3:chr3H:153769802-153769903:153769797-153769903:-:alternative1";
chr3H	PanBaRT20_trans_aveTPM10.gtf	exon	153769697	153769797	.	-	.	gene_id "A3:chr3H:153769802-153769903:153769797-153769903:-"; transcript_id "A3:chr3H:153769802-153769903:153769797-153769903:-:alternative2";
chr3H	PanBaRT20_trans_aveTPM10.gtf	exon	153769903	153770003	.	-	.	gene_id "A3:chr3H:153769802-153769903:153769797-153769903:-"; transcript_id "A3:chr3H:153769802-153769903:153769797-153769903:-:alternative2";
chr3H	PanBaRT20_trans_aveTPM10.gtf	exon	162660854	162660965	.	-	.	gene_id "A3:chr3H:162660965-162661060:162660954-162661060:-"; transcript_id "A3:chr3H:162660965-162661060:162660954-162661060:-:alternative1";
chr3H	PanBaRT20_trans_aveTPM10.gtf	exon	162661060	162661160	.	-	.	gene_id "A3:chr3H:162660965-162661060:162660954-162661060:-"; transcript_id "A3:chr3H:162660965-162661060:162660954-162661060:-:alternative1";
chr3H	PanBaRT20_trans_aveTPM10.gtf	exon	162660854	162660954	.	-	.	gene_id "A3:chr3H:162660965-162661060:162660954-162661060:-"; transcript_id "A3:chr3H:162660965-162661060:162660954-162661060:-:alternative2";
chr3H	PanBaRT20_trans_aveTPM10.gtf	exon	162661060	162661160	.	-	.	gene_id "A3:chr3H:162660965-162661060:162660954-162661060:-"; transcript_id "A3:chr3H:162660965-162661060:162660954-162661060:-:alternative2";
chr3H	PanBaRT20_trans_aveTPM10.gtf	exon	172229277	172229431	.	-	.	gene_id "A3:chr3H:172229431-172229809:172229377-172229809:-"; transcript_id "A3:chr3H:172229431-172229809:172229377-172229809:-:alternative1";
chr3H	PanBaRT20_trans_aveTPM10.gtf	exon	172229809	172229909	.	-	.	gene_id "A3:chr3H:172229431-172229809:172229377-172229809:-"; transcript_id "A3:chr3H:172229431-172229809:172229377-172229809:-:alternative1";
chr3H	PanBaRT20_trans_aveTPM10.gtf	exon	172229277	172229377	.	-	.	gene_id "A3:chr3H:172229431-172229809:172229377-172229809:-"; transcript_id "A3:chr3H:172229431-172229809:172229377-172229809:-:alternative2";
chr3H	PanBaRT20_trans_aveTPM10.gtf	exon	172229809	172229909	.	-	.	gene_id "A3:chr3H:172229431-172229809:172229377-172229809:-"; transcript_id "A3:chr3H:172229431-172229809:172229377-172229809:-:alternative2";
chr3H	PanBaRT20_trans_aveTPM10.gtf	exon	205619051	205619154	.	-	.	gene_id "A3:chr3H:205619154-205619248:205619151-205619248:-"; transcript_id "A3:chr3H:205619154-205619248:205619151-205619248:-:alternative1";
chr3H	PanBaRT20_trans_aveTPM10.gtf	exon	205619248	205619348	.	-	.	gene_id "A3:chr3H:205619154-205619248:205619151-205619248:-"; transcript_id "A3:chr3H:205619154-205619248:205619151-205619248:-:alternative1";
chr3H	PanBaRT20_trans_aveTPM10.gtf	exon	205619051	205619151	.	-	.	gene_id "A3:chr3H:205619154-205619248:205619151-205619248:-"; transcript_id "A3:chr3H:205619154-205619248:205619151-205619248:-:alternative2";
chr3H	PanBaRT20_trans_aveTPM10.gtf	exon	205619248	205619348	.	-	.	gene_id "A3:chr3H:205619154-205619248:205619151-205619248:-"; transcript_id "A3:chr3H:205619154-205619248:205619151-205619248:-:alternative2";
chr3H	PanBaRT20_trans_aveTPM10.gtf	exon	206908445	206908548	.	-	.	gene_id "A3:chr3H:206908548-206909160:206908545-206909160:-"; transcript_id "A3:chr3H:206908548-206909160:206908545-206909160:-:alternative1";
chr3H	PanBaRT20_trans_aveTPM10.gtf	exon	206909160	206909260	.	-	.	gene_id "A3:chr3H:206908548-206909160:206908545-206909160:-"; transcript_id "A3:chr3H:206908548-206909160:206908545-206909160:-:alternative1";
chr3H	PanBaRT20_trans_aveTPM10.gtf	exon	206908445	206908545	.	-	.	gene_id "A3:chr3H:206908548-206909160:206908545-206909160:-"; transcript_id "A3:chr3H:206908548-206909160:206908545-206909160:-:alternative2";
chr3H	PanBaRT20_trans_aveTPM10.gtf	exon	206909160	206909260	.	-	.	gene_id "A3:chr3H:206908548-206909160:206908545-206909160:-"; transcript_id "A3:chr3H:206908548-206909160:206908545-206909160:-:alternative2";
chr3H	PanBaRT20_trans_aveTPM10.gtf	exon	218489172	218489275	.	-	.	gene_id "A3:chr3H:218489275-218490158:218489272-218490158:-"; transcript_id "A3:chr3H:218489275-218490158:218489272-218490158:-:alternative1";
chr3H	PanBaRT20_trans_aveTPM10.gtf	exon	218490158	218490258	.	-	.	gene_id "A3:chr3H:218489275-218490158:218489272-218490158:-"; transcript_id "A3:chr3H:218489275-218490158:218489272-218490158:-:alternative1";
chr3H	PanBaRT20_trans_aveTPM10.gtf	exon	218489172	218489272	.	-	.	gene_id "A3:chr3H:218489275-218490158:218489272-218490158:-"; transcript_id "A3:chr3H:218489275-218490158:218489272-218490158:-:alternative2";
chr3H	PanBaRT20_trans_aveTPM10.gtf	exon	218490158	218490258	.	-	.	gene_id "A3:chr3H:218489275-218490158:218489272-218490158:-"; transcript_id "A3:chr3H:218489275-218490158:218489272-218490158:-:alternative2";
chr3H	PanBaRT20_trans_aveTPM10.gtf	exon	335458616	335458719	.	-	.	gene_id "A3:chr3H:335458719-335458961:335458716-335458961:-"; transcript_id "A3:chr3H:335458719-335458961:335458716-335458961:-:alternative1";
chr3H	PanBaRT20_trans_aveTPM10.gtf	exon	335458961	335459061	.	-	.	gene_id "A3:chr3H:335458719-335458961:335458716-335458961:-"; transcript_id "A3:chr3H:335458719-335458961:335458716-335458961:-:alternative1";
chr3H	PanBaRT20_trans_aveTPM10.gtf	exon	335458616	335458716	.	-	.	gene_id "A3:chr3H:335458719-335458961:335458716-335458961:-"; transcript_id "A3:chr3H:335458719-335458961:335458716-335458961:-:alternative2";
chr3H	PanBaRT20_trans_aveTPM10.gtf	exon	335458961	335459061	.	-	.	gene_id "A3:chr3H:335458719-335458961:335458716-335458961:-"; transcript_id "A3:chr3H:335458719-335458961:335458716-335458961:-:alternative2";
chr3H	PanBaRT20_trans_aveTPM10.gtf	exon	444953760	444953872	.	-	.	gene_id "A3:chr3H:444953872-444956072:444953860-444956072:-"; transcript_id "A3:chr3H:444953872-444956072:444953860-444956072:-:alternative1";
chr3H	PanBaRT20_trans_aveTPM10.gtf	exon	444956072	444956172	.	-	.	gene_id "A3:chr3H:444953872-444956072:444953860-444956072:-"; transcript_id "A3:chr3H:444953872-444956072:444953860-444956072:-:alternative1";
chr3H	PanBaRT20_trans_aveTPM10.gtf	exon	444953760	444953860	.	-	.	gene_id "A3:chr3H:444953872-444956072:444953860-444956072:-"; transcript_id "A3:chr3H:444953872-444956072:444953860-444956072:-:alternative2";
chr3H	PanBaRT20_trans_aveTPM10.gtf	exon	444956072	444956172	.	-	.	gene_id "A3:chr3H:444953872-444956072:444953860-444956072:-"; transcript_id "A3:chr3H:444953872-444956072:444953860-444956072:-:alternative2";
chr3H	PanBaRT20_trans_aveTPM10.gtf	exon	474358772	474358875	.	-	.	gene_id "A3:chr3H:474358875-474359902:474358872-474359902:-"; transcript_id "A3:chr3H:474358875-474359902:474358872-474359902:-:alternative1";
chr3H	PanBaRT20_trans_aveTPM10.gtf	exon	474359902	474360002	.	-	.	gene_id "A3:chr3H:474358875-474359902:474358872-474359902:-"; transcript_id "A3:chr3H:474358875-474359902:474358872-474359902:-:alternative1";
chr3H	PanBaRT20_trans_aveTPM10.gtf	exon	474358772	474358872	.	-	.	gene_id "A3:chr3H:474358875-474359902:474358872-474359902:-"; transcript_id "A3:chr3H:474358875-474359902:474358872-474359902:-:alternative2";
chr3H	PanBaRT20_trans_aveTPM10.gtf	exon	474359902	474360002	.	-	.	gene_id "A3:chr3H:474358875-474359902:474358872-474359902:-"; transcript_id "A3:chr3H:474358875-474359902:474358872-474359902:-:alternative2";
chr3H	PanBaRT20_trans_aveTPM10.gtf	exon	529317949	529318071	.	-	.	gene_id "A3:chr3H:529318071-529318162:529318049-529318162:-"; transcript_id "A3:chr3H:529318071-529318162:529318049-529318162:-:alternative1";
chr3H	PanBaRT20_trans_aveTPM10.gtf	exon	529318162	529318262	.	-	.	gene_id "A3:chr3H:529318071-529318162:529318049-529318162:-"; transcript_id "A3:chr3H:529318071-529318162:529318049-529318162:-:alternative1";
chr3H	PanBaRT20_trans_aveTPM10.gtf	exon	529317949	529318049	.	-	.	gene_id "A3:chr3H:529318071-529318162:529318049-529318162:-"; transcript_id "A3:chr3H:529318071-529318162:529318049-529318162:-:alternative2";
chr3H	PanBaRT20_trans_aveTPM10.gtf	exon	529318162	529318262	.	-	.	gene_id "A3:chr3H:529318071-529318162:529318049-529318162:-"; transcript_id "A3:chr3H:529318071-529318162:529318049-529318162:-:alternative2";
chr3H	PanBaRT20_trans_aveTPM10.gtf	exon	532119858	532119966	.	-	.	gene_id "A3:chr3H:532119966-532120052:532119958-532120052:-"; transcript_id "A3:chr3H:532119966-532120052:532119958-532120052:-:alternative1";
chr3H	PanBaRT20_trans_aveTPM10.gtf	exon	532120052	532120152	.	-	.	gene_id "A3:chr3H:532119966-532120052:532119958-532120052:-"; transcript_id "A3:chr3H:532119966-532120052:532119958-532120052:-:alternative1";
chr3H	PanBaRT20_trans_aveTPM10.gtf	exon	532119858	532119958	.	-	.	gene_id "A3:chr3H:532119966-532120052:532119958-532120052:-"; transcript_id "A3:chr3H:532119966-532120052:532119958-532120052:-:alternative2";
chr3H	PanBaRT20_trans_aveTPM10.gtf	exon	532120052	532120152	.	-	.	gene_id "A3:chr3H:532119966-532120052:532119958-532120052:-"; transcript_id "A3:chr3H:532119966-532120052:532119958-532120052:-:alternative2";
chr3H	PanBaRT20_trans_aveTPM10.gtf	exon	557111294	557111400	.	-	.	gene_id "A3:chr3H:557111400-557111485:557111394-557111485:-"; transcript_id "A3:chr3H:557111400-557111485:557111394-557111485:-:alternative1";
chr3H	PanBaRT20_trans_aveTPM10.gtf	exon	557111485	557111585	.	-	.	gene_id "A3:chr3H:557111400-557111485:557111394-557111485:-"; transcript_id "A3:chr3H:557111400-557111485:557111394-557111485:-:alternative1";
chr3H	PanBaRT20_trans_aveTPM10.gtf	exon	557111294	557111394	.	-	.	gene_id "A3:chr3H:557111400-557111485:557111394-557111485:-"; transcript_id "A3:chr3H:557111400-557111485:557111394-557111485:-:alternative2";
chr3H	PanBaRT20_trans_aveTPM10.gtf	exon	557111485	557111585	.	-	.	gene_id "A3:chr3H:557111400-557111485:557111394-557111485:-"; transcript_id "A3:chr3H:557111400-557111485:557111394-557111485:-:alternative2";
chr3H	PanBaRT20_trans_aveTPM10.gtf	exon	572421066	572421186	.	-	.	gene_id "A3:chr3H:572421186-572421519:572421166-572421519:-"; transcript_id "A3:chr3H:572421186-572421519:572421166-572421519:-:alternative1";
chr3H	PanBaRT20_trans_aveTPM10.gtf	exon	572421519	572421619	.	-	.	gene_id "A3:chr3H:572421186-572421519:572421166-572421519:-"; transcript_id "A3:chr3H:572421186-572421519:572421166-572421519:-:alternative1";
chr3H	PanBaRT20_trans_aveTPM10.gtf	exon	572421066	572421166	.	-	.	gene_id "A3:chr3H:572421186-572421519:572421166-572421519:-"; transcript_id "A3:chr3H:572421186-572421519:572421166-572421519:-:alternative2";
chr3H	PanBaRT20_trans_aveTPM10.gtf	exon	572421519	572421619	.	-	.	gene_id "A3:chr3H:572421186-572421519:572421166-572421519:-"; transcript_id "A3:chr3H:572421186-572421519:572421166-572421519:-:alternative2";
chr3H	PanBaRT20_trans_aveTPM10.gtf	exon	576458095	576458254	.	-	.	gene_id "A3:chr3H:576458254-576458350:576458195-576458350:-"; transcript_id "A3:chr3H:576458254-576458350:576458195-576458350:-:alternative1";
chr3H	PanBaRT20_trans_aveTPM10.gtf	exon	576458350	576458450	.	-	.	gene_id "A3:chr3H:576458254-576458350:576458195-576458350:-"; transcript_id "A3:chr3H:576458254-576458350:576458195-576458350:-:alternative1";
chr3H	PanBaRT20_trans_aveTPM10.gtf	exon	576458095	576458195	.	-	.	gene_id "A3:chr3H:576458254-576458350:576458195-576458350:-"; transcript_id "A3:chr3H:576458254-576458350:576458195-576458350:-:alternative2";
chr3H	PanBaRT20_trans_aveTPM10.gtf	exon	576458350	576458450	.	-	.	gene_id "A3:chr3H:576458254-576458350:576458195-576458350:-"; transcript_id "A3:chr3H:576458254-576458350:576458195-576458350:-:alternative2";
chr3H	PanBaRT20_trans_aveTPM10.gtf	exon	580382751	580382854	.	-	.	gene_id "A3:chr3H:580382854-580382950:580382851-580382950:-"; transcript_id "A3:chr3H:580382854-580382950:580382851-580382950:-:alternative1";
chr3H	PanBaRT20_trans_aveTPM10.gtf	exon	580382950	580383050	.	-	.	gene_id "A3:chr3H:580382854-580382950:580382851-580382950:-"; transcript_id "A3:chr3H:580382854-580382950:580382851-580382950:-:alternative1";
chr3H	PanBaRT20_trans_aveTPM10.gtf	exon	580382751	580382851	.	-	.	gene_id "A3:chr3H:580382854-580382950:580382851-580382950:-"; transcript_id "A3:chr3H:580382854-580382950:580382851-580382950:-:alternative2";
chr3H	PanBaRT20_trans_aveTPM10.gtf	exon	580382950	580383050	.	-	.	gene_id "A3:chr3H:580382854-580382950:580382851-580382950:-"; transcript_id "A3:chr3H:580382854-580382950:580382851-580382950:-:alternative2";
chr3H	PanBaRT20_trans_aveTPM10.gtf	exon	622796203	622796306	.	-	.	gene_id "A3:chr3H:622796306-622796402:622796303-622796402:-"; transcript_id "A3:chr3H:622796306-622796402:622796303-622796402:-:alternative1";
chr3H	PanBaRT20_trans_aveTPM10.gtf	exon	622796402	622796502	.	-	.	gene_id "A3:chr3H:622796306-622796402:622796303-622796402:-"; transcript_id "A3:chr3H:622796306-622796402:622796303-622796402:-:alternative1";
chr3H	PanBaRT20_trans_aveTPM10.gtf	exon	622796203	622796303	.	-	.	gene_id "A3:chr3H:622796306-622796402:622796303-622796402:-"; transcript_id "A3:chr3H:622796306-622796402:622796303-622796402:-:alternative2";
chr3H	PanBaRT20_trans_aveTPM10.gtf	exon	622796402	622796502	.	-	.	gene_id "A3:chr3H:622796306-622796402:622796303-622796402:-"; transcript_id "A3:chr3H:622796306-622796402:622796303-622796402:-:alternative2";
chr3H	PanBaRT20_trans_aveTPM10.gtf	exon	628158439	628158548	.	-	.	gene_id "A3:chr3H:628158548-628158672:628158539-628158672:-"; transcript_id "A3:chr3H:628158548-628158672:628158539-628158672:-:alternative1";
chr3H	PanBaRT20_trans_aveTPM10.gtf	exon	628158672	628158772	.	-	.	gene_id "A3:chr3H:628158548-628158672:628158539-628158672:-"; transcript_id "A3:chr3H:628158548-628158672:628158539-628158672:-:alternative1";
chr3H	PanBaRT20_trans_aveTPM10.gtf	exon	628158439	628158539	.	-	.	gene_id "A3:chr3H:628158548-628158672:628158539-628158672:-"; transcript_id "A3:chr3H:628158548-628158672:628158539-628158672:-:alternative2";
chr3H	PanBaRT20_trans_aveTPM10.gtf	exon	628158672	628158772	.	-	.	gene_id "A3:chr3H:628158548-628158672:628158539-628158672:-"; transcript_id "A3:chr3H:628158548-628158672:628158539-628158672:-:alternative2";
chr3H	PanBaRT20_trans_aveTPM10.gtf	exon	650664078	650664403	.	-	.	gene_id "A3:chr3H:650664403-650665758:650664178-650665758:-"; transcript_id "A3:chr3H:650664403-650665758:650664178-650665758:-:alternative1";
chr3H	PanBaRT20_trans_aveTPM10.gtf	exon	650665758	650665858	.	-	.	gene_id "A3:chr3H:650664403-650665758:650664178-650665758:-"; transcript_id "A3:chr3H:650664403-650665758:650664178-650665758:-:alternative1";
chr3H	PanBaRT20_trans_aveTPM10.gtf	exon	650664078	650664178	.	-	.	gene_id "A3:chr3H:650664403-650665758:650664178-650665758:-"; transcript_id "A3:chr3H:650664403-650665758:650664178-650665758:-:alternative2";
chr3H	PanBaRT20_trans_aveTPM10.gtf	exon	650665758	650665858	.	-	.	gene_id "A3:chr3H:650664403-650665758:650664178-650665758:-"; transcript_id "A3:chr3H:650664403-650665758:650664178-650665758:-:alternative2";
chr3H	PanBaRT20_trans_aveTPM10.gtf	exon	660017911	660018014	.	-	.	gene_id "A3:chr3H:660018014-660018182:660018011-660018182:-"; transcript_id "A3:chr3H:660018014-660018182:660018011-660018182:-:alternative1";
chr3H	PanBaRT20_trans_aveTPM10.gtf	exon	660018182	660018282	.	-	.	gene_id "A3:chr3H:660018014-660018182:660018011-660018182:-"; transcript_id "A3:chr3H:660018014-660018182:660018011-660018182:-:alternative1";
chr3H	PanBaRT20_trans_aveTPM10.gtf	exon	660017911	660018011	.	-	.	gene_id "A3:chr3H:660018014-660018182:660018011-660018182:-"; transcript_id "A3:chr3H:660018014-660018182:660018011-660018182:-:alternative2";
chr3H	PanBaRT20_trans_aveTPM10.gtf	exon	660018182	660018282	.	-	.	gene_id "A3:chr3H:660018014-660018182:660018011-660018182:-"; transcript_id "A3:chr3H:660018014-660018182:660018011-660018182:-:alternative2";
chr3H	PanBaRT20_trans_aveTPM10.gtf	exon	674890386	674890490	.	-	.	gene_id "A3:chr3H:674890490-674890584:674890486-674890584:-"; transcript_id "A3:chr3H:674890490-674890584:674890486-674890584:-:alternative1";
chr3H	PanBaRT20_trans_aveTPM10.gtf	exon	674890584	674890684	.	-	.	gene_id "A3:chr3H:674890490-674890584:674890486-674890584:-"; transcript_id "A3:chr3H:674890490-674890584:674890486-674890584:-:alternative1";
chr3H	PanBaRT20_trans_aveTPM10.gtf	exon	674890386	674890486	.	-	.	gene_id "A3:chr3H:674890490-674890584:674890486-674890584:-"; transcript_id "A3:chr3H:674890490-674890584:674890486-674890584:-:alternative2";
chr3H	PanBaRT20_trans_aveTPM10.gtf	exon	674890584	674890684	.	-	.	gene_id "A3:chr3H:674890490-674890584:674890486-674890584:-"; transcript_id "A3:chr3H:674890490-674890584:674890486-674890584:-:alternative2";
chr3H	PanBaRT20_trans_aveTPM10.gtf	exon	675718743	675718848	.	-	.	gene_id "A3:chr3H:675718848-675718973:675718843-675718973:-"; transcript_id "A3:chr3H:675718848-675718973:675718843-675718973:-:alternative1";
chr3H	PanBaRT20_trans_aveTPM10.gtf	exon	675718973	675719073	.	-	.	gene_id "A3:chr3H:675718848-675718973:675718843-675718973:-"; transcript_id "A3:chr3H:675718848-675718973:675718843-675718973:-:alternative1";
chr3H	PanBaRT20_trans_aveTPM10.gtf	exon	675718743	675718843	.	-	.	gene_id "A3:chr3H:675718848-675718973:675718843-675718973:-"; transcript_id "A3:chr3H:675718848-675718973:675718843-675718973:-:alternative2";
chr3H	PanBaRT20_trans_aveTPM10.gtf	exon	675718973	675719073	.	-	.	gene_id "A3:chr3H:675718848-675718973:675718843-675718973:-"; transcript_id "A3:chr3H:675718848-675718973:675718843-675718973:-:alternative2";
chr3H	PanBaRT20_trans_aveTPM10.gtf	exon	678566906	678567028	.	-	.	gene_id "A3:chr3H:678567028-678567398:678567006-678567398:-"; transcript_id "A3:chr3H:678567028-678567398:678567006-678567398:-:alternative1";
chr3H	PanBaRT20_trans_aveTPM10.gtf	exon	678567398	678567498	.	-	.	gene_id "A3:chr3H:678567028-678567398:678567006-678567398:-"; transcript_id "A3:chr3H:678567028-678567398:678567006-678567398:-:alternative1";
chr3H	PanBaRT20_trans_aveTPM10.gtf	exon	678566906	678567006	.	-	.	gene_id "A3:chr3H:678567028-678567398:678567006-678567398:-"; transcript_id "A3:chr3H:678567028-678567398:678567006-678567398:-:alternative2";
chr3H	PanBaRT20_trans_aveTPM10.gtf	exon	678567398	678567498	.	-	.	gene_id "A3:chr3H:678567028-678567398:678567006-678567398:-"; transcript_id "A3:chr3H:678567028-678567398:678567006-678567398:-:alternative2";
chr3H	PanBaRT20_trans_aveTPM10.gtf	exon	14946654	14946754	.	+	.	gene_id "A3:chr3H:14946754-14948038:14946754-14948072:+"; transcript_id "A3:chr3H:14946754-14948038:14946754-14948072:+:alternative1";
chr3H	PanBaRT20_trans_aveTPM10.gtf	exon	14948038	14948172	.	+	.	gene_id "A3:chr3H:14946754-14948038:14946754-14948072:+"; transcript_id "A3:chr3H:14946754-14948038:14946754-14948072:+:alternative1";
chr3H	PanBaRT20_trans_aveTPM10.gtf	exon	14946654	14946754	.	+	.	gene_id "A3:chr3H:14946754-14948038:14946754-14948072:+"; transcript_id "A3:chr3H:14946754-14948038:14946754-14948072:+:alternative2";
chr3H	PanBaRT20_trans_aveTPM10.gtf	exon	14948072	14948172	.	+	.	gene_id "A3:chr3H:14946754-14948038:14946754-14948072:+"; transcript_id "A3:chr3H:14946754-14948038:14946754-14948072:+:alternative2";
chr3H	PanBaRT20_trans_aveTPM10.gtf	exon	25059286	25059386	.	+	.	gene_id "A3:chr3H:25059386-25059486:25059386-25059562:+"; transcript_id "A3:chr3H:25059386-25059486:25059386-25059562:+:alternative1";
chr3H	PanBaRT20_trans_aveTPM10.gtf	exon	25059486	25059662	.	+	.	gene_id "A3:chr3H:25059386-25059486:25059386-25059562:+"; transcript_id "A3:chr3H:25059386-25059486:25059386-25059562:+:alternative1";
chr3H	PanBaRT20_trans_aveTPM10.gtf	exon	25059286	25059386	.	+	.	gene_id "A3:chr3H:25059386-25059486:25059386-25059562:+"; transcript_id "A3:chr3H:25059386-25059486:25059386-25059562:+:alternative2";
chr3H	PanBaRT20_trans_aveTPM10.gtf	exon	25059562	25059662	.	+	.	gene_id "A3:chr3H:25059386-25059486:25059386-25059562:+"; transcript_id "A3:chr3H:25059386-25059486:25059386-25059562:+:alternative2";
chr3H	PanBaRT20_trans_aveTPM10.gtf	exon	30587864	30587964	.	+	.	gene_id "A3:chr3H:30587964-30588066:30587964-30588075:+"; transcript_id "A3:chr3H:30587964-30588066:30587964-30588075:+:alternative1";
chr3H	PanBaRT20_trans_aveTPM10.gtf	exon	30588066	30588175	.	+	.	gene_id "A3:chr3H:30587964-30588066:30587964-30588075:+"; transcript_id "A3:chr3H:30587964-30588066:30587964-30588075:+:alternative1";
chr3H	PanBaRT20_trans_aveTPM10.gtf	exon	30587864	30587964	.	+	.	gene_id "A3:chr3H:30587964-30588066:30587964-30588075:+"; transcript_id "A3:chr3H:30587964-30588066:30587964-30588075:+:alternative2";
chr3H	PanBaRT20_trans_aveTPM10.gtf	exon	30588075	30588175	.	+	.	gene_id "A3:chr3H:30587964-30588066:30587964-30588075:+"; transcript_id "A3:chr3H:30587964-30588066:30587964-30588075:+:alternative2";
chr3H	PanBaRT20_trans_aveTPM10.gtf	exon	41921398	41921498	.	+	.	gene_id "A3:chr3H:41921498-41921591:41921498-41921628:+"; transcript_id "A3:chr3H:41921498-41921591:41921498-41921628:+:alternative1";
chr3H	PanBaRT20_trans_aveTPM10.gtf	exon	41921591	41921728	.	+	.	gene_id "A3:chr3H:41921498-41921591:41921498-41921628:+"; transcript_id "A3:chr3H:41921498-41921591:41921498-41921628:+:alternative1";
chr3H	PanBaRT20_trans_aveTPM10.gtf	exon	41921398	41921498	.	+	.	gene_id "A3:chr3H:41921498-41921591:41921498-41921628:+"; transcript_id "A3:chr3H:41921498-41921591:41921498-41921628:+:alternative2";
chr3H	PanBaRT20_trans_aveTPM10.gtf	exon	41921628	41921728	.	+	.	gene_id "A3:chr3H:41921498-41921591:41921498-41921628:+"; transcript_id "A3:chr3H:41921498-41921591:41921498-41921628:+:alternative2";
chr3H	PanBaRT20_trans_aveTPM10.gtf	exon	41921398	41921498	.	+	.	gene_id "A3:chr3H:41921498-41921583:41921498-41921591:+"; transcript_id "A3:chr3H:41921498-41921583:41921498-41921591:+:alternative1";
chr3H	PanBaRT20_trans_aveTPM10.gtf	exon	41921583	41921691	.	+	.	gene_id "A3:chr3H:41921498-41921583:41921498-41921591:+"; transcript_id "A3:chr3H:41921498-41921583:41921498-41921591:+:alternative1";
chr3H	PanBaRT20_trans_aveTPM10.gtf	exon	41921398	41921498	.	+	.	gene_id "A3:chr3H:41921498-41921583:41921498-41921591:+"; transcript_id "A3:chr3H:41921498-41921583:41921498-41921591:+:alternative2";
chr3H	PanBaRT20_trans_aveTPM10.gtf	exon	41921591	41921691	.	+	.	gene_id "A3:chr3H:41921498-41921583:41921498-41921591:+"; transcript_id "A3:chr3H:41921498-41921583:41921498-41921591:+:alternative2";
chr3H	PanBaRT20_trans_aveTPM10.gtf	exon	41921398	41921498	.	+	.	gene_id "A3:chr3H:41921498-41921583:41921498-41921628:+"; transcript_id "A3:chr3H:41921498-41921583:41921498-41921628:+:alternative1";
chr3H	PanBaRT20_trans_aveTPM10.gtf	exon	41921583	41921728	.	+	.	gene_id "A3:chr3H:41921498-41921583:41921498-41921628:+"; transcript_id "A3:chr3H:41921498-41921583:41921498-41921628:+:alternative1";
chr3H	PanBaRT20_trans_aveTPM10.gtf	exon	41921398	41921498	.	+	.	gene_id "A3:chr3H:41921498-41921583:41921498-41921628:+"; transcript_id "A3:chr3H:41921498-41921583:41921498-41921628:+:alternative2";
chr3H	PanBaRT20_trans_aveTPM10.gtf	exon	41921628	41921728	.	+	.	gene_id "A3:chr3H:41921498-41921583:41921498-41921628:+"; transcript_id "A3:chr3H:41921498-41921583:41921498-41921628:+:alternative2";
chr3H	PanBaRT20_trans_aveTPM10.gtf	exon	66237717	66237817	.	+	.	gene_id "A3:chr3H:66237817-66237955:66237817-66237967:+"; transcript_id "A3:chr3H:66237817-66237955:66237817-66237967:+:alternative1";
chr3H	PanBaRT20_trans_aveTPM10.gtf	exon	66237955	66238067	.	+	.	gene_id "A3:chr3H:66237817-66237955:66237817-66237967:+"; transcript_id "A3:chr3H:66237817-66237955:66237817-66237967:+:alternative1";
chr3H	PanBaRT20_trans_aveTPM10.gtf	exon	66237717	66237817	.	+	.	gene_id "A3:chr3H:66237817-66237955:66237817-66237967:+"; transcript_id "A3:chr3H:66237817-66237955:66237817-66237967:+:alternative2";
chr3H	PanBaRT20_trans_aveTPM10.gtf	exon	66237967	66238067	.	+	.	gene_id "A3:chr3H:66237817-66237955:66237817-66237967:+"; transcript_id "A3:chr3H:66237817-66237955:66237817-66237967:+:alternative2";
chr3H	PanBaRT20_trans_aveTPM10.gtf	exon	86327979	86328079	.	+	.	gene_id "A3:chr3H:86328079-86328198:86328079-86328207:+"; transcript_id "A3:chr3H:86328079-86328198:86328079-86328207:+:alternative1";
chr3H	PanBaRT20_trans_aveTPM10.gtf	exon	86328198	86328307	.	+	.	gene_id "A3:chr3H:86328079-86328198:86328079-86328207:+"; transcript_id "A3:chr3H:86328079-86328198:86328079-86328207:+:alternative1";
chr3H	PanBaRT20_trans_aveTPM10.gtf	exon	86327979	86328079	.	+	.	gene_id "A3:chr3H:86328079-86328198:86328079-86328207:+"; transcript_id "A3:chr3H:86328079-86328198:86328079-86328207:+:alternative2";
chr3H	PanBaRT20_trans_aveTPM10.gtf	exon	86328207	86328307	.	+	.	gene_id "A3:chr3H:86328079-86328198:86328079-86328207:+"; transcript_id "A3:chr3H:86328079-86328198:86328079-86328207:+:alternative2";
chr3H	PanBaRT20_trans_aveTPM10.gtf	exon	92146288	92146388	.	+	.	gene_id "A3:chr3H:92146388-92146524:92146388-92146527:+"; transcript_id "A3:chr3H:92146388-92146524:92146388-92146527:+:alternative1";
chr3H	PanBaRT20_trans_aveTPM10.gtf	exon	92146524	92146627	.	+	.	gene_id "A3:chr3H:92146388-92146524:92146388-92146527:+"; transcript_id "A3:chr3H:92146388-92146524:92146388-92146527:+:alternative1";
chr3H	PanBaRT20_trans_aveTPM10.gtf	exon	92146288	92146388	.	+	.	gene_id "A3:chr3H:92146388-92146524:92146388-92146527:+"; transcript_id "A3:chr3H:92146388-92146524:92146388-92146527:+:alternative2";
chr3H	PanBaRT20_trans_aveTPM10.gtf	exon	92146527	92146627	.	+	.	gene_id "A3:chr3H:92146388-92146524:92146388-92146527:+"; transcript_id "A3:chr3H:92146388-92146524:92146388-92146527:+:alternative2";
chr3H	PanBaRT20_trans_aveTPM10.gtf	exon	94419164	94419264	.	+	.	gene_id "A3:chr3H:94419264-94419726:94419264-94419731:+"; transcript_id "A3:chr3H:94419264-94419726:94419264-94419731:+:alternative1";
chr3H	PanBaRT20_trans_aveTPM10.gtf	exon	94419726	94419831	.	+	.	gene_id "A3:chr3H:94419264-94419726:94419264-94419731:+"; transcript_id "A3:chr3H:94419264-94419726:94419264-94419731:+:alternative1";
chr3H	PanBaRT20_trans_aveTPM10.gtf	exon	94419164	94419264	.	+	.	gene_id "A3:chr3H:94419264-94419726:94419264-94419731:+"; transcript_id "A3:chr3H:94419264-94419726:94419264-94419731:+:alternative2";
chr3H	PanBaRT20_trans_aveTPM10.gtf	exon	94419731	94419831	.	+	.	gene_id "A3:chr3H:94419264-94419726:94419264-94419731:+"; transcript_id "A3:chr3H:94419264-94419726:94419264-94419731:+:alternative2";
chr3H	PanBaRT20_trans_aveTPM10.gtf	exon	150499795	150499895	.	+	.	gene_id "A3:chr3H:150499895-150500763:150499895-150500766:+"; transcript_id "A3:chr3H:150499895-150500763:150499895-150500766:+:alternative1";
chr3H	PanBaRT20_trans_aveTPM10.gtf	exon	150500763	150500866	.	+	.	gene_id "A3:chr3H:150499895-150500763:150499895-150500766:+"; transcript_id "A3:chr3H:150499895-150500763:150499895-150500766:+:alternative1";
chr3H	PanBaRT20_trans_aveTPM10.gtf	exon	150499795	150499895	.	+	.	gene_id "A3:chr3H:150499895-150500763:150499895-150500766:+"; transcript_id "A3:chr3H:150499895-150500763:150499895-150500766:+:alternative2";
chr3H	PanBaRT20_trans_aveTPM10.gtf	exon	150500766	150500866	.	+	.	gene_id "A3:chr3H:150499895-150500763:150499895-150500766:+"; transcript_id "A3:chr3H:150499895-150500763:150499895-150500766:+:alternative2";
chr3H	PanBaRT20_trans_aveTPM10.gtf	exon	202618881	202618981	.	+	.	gene_id "A3:chr3H:202618981-202619162:202618981-202619180:+"; transcript_id "A3:chr3H:202618981-202619162:202618981-202619180:+:alternative1";
chr3H	PanBaRT20_trans_aveTPM10.gtf	exon	202619162	202619280	.	+	.	gene_id "A3:chr3H:202618981-202619162:202618981-202619180:+"; transcript_id "A3:chr3H:202618981-202619162:202618981-202619180:+:alternative1";
chr3H	PanBaRT20_trans_aveTPM10.gtf	exon	202618881	202618981	.	+	.	gene_id "A3:chr3H:202618981-202619162:202618981-202619180:+"; transcript_id "A3:chr3H:202618981-202619162:202618981-202619180:+:alternative2";
chr3H	PanBaRT20_trans_aveTPM10.gtf	exon	202619180	202619280	.	+	.	gene_id "A3:chr3H:202618981-202619162:202618981-202619180:+"; transcript_id "A3:chr3H:202618981-202619162:202618981-202619180:+:alternative2";
chr3H	PanBaRT20_trans_aveTPM10.gtf	exon	267957780	267957880	.	+	.	gene_id "A3:chr3H:267957880-267957967:267957880-267957971:+"; transcript_id "A3:chr3H:267957880-267957967:267957880-267957971:+:alternative1";
chr3H	PanBaRT20_trans_aveTPM10.gtf	exon	267957967	267958071	.	+	.	gene_id "A3:chr3H:267957880-267957967:267957880-267957971:+"; transcript_id "A3:chr3H:267957880-267957967:267957880-267957971:+:alternative1";
chr3H	PanBaRT20_trans_aveTPM10.gtf	exon	267957780	267957880	.	+	.	gene_id "A3:chr3H:267957880-267957967:267957880-267957971:+"; transcript_id "A3:chr3H:267957880-267957967:267957880-267957971:+:alternative2";
chr3H	PanBaRT20_trans_aveTPM10.gtf	exon	267957971	267958071	.	+	.	gene_id "A3:chr3H:267957880-267957967:267957880-267957971:+"; transcript_id "A3:chr3H:267957880-267957967:267957880-267957971:+:alternative2";
chr3H	PanBaRT20_trans_aveTPM10.gtf	exon	400008401	400008501	.	+	.	gene_id "A3:chr3H:400008501-400009324:400008501-400009327:+"; transcript_id "A3:chr3H:400008501-400009324:400008501-400009327:+:alternative1";
chr3H	PanBaRT20_trans_aveTPM10.gtf	exon	400009324	400009427	.	+	.	gene_id "A3:chr3H:400008501-400009324:400008501-400009327:+"; transcript_id "A3:chr3H:400008501-400009324:400008501-400009327:+:alternative1";
chr3H	PanBaRT20_trans_aveTPM10.gtf	exon	400008401	400008501	.	+	.	gene_id "A3:chr3H:400008501-400009324:400008501-400009327:+"; transcript_id "A3:chr3H:400008501-400009324:400008501-400009327:+:alternative2";
chr3H	PanBaRT20_trans_aveTPM10.gtf	exon	400009327	400009427	.	+	.	gene_id "A3:chr3H:400008501-400009324:400008501-400009327:+"; transcript_id "A3:chr3H:400008501-400009324:400008501-400009327:+:alternative2";
chr3H	PanBaRT20_trans_aveTPM10.gtf	exon	449190804	449190904	.	+	.	gene_id "A3:chr3H:449190904-449191027:449190904-449191114:+"; transcript_id "A3:chr3H:449190904-449191027:449190904-449191114:+:alternative1";
chr3H	PanBaRT20_trans_aveTPM10.gtf	exon	449191027	449191214	.	+	.	gene_id "A3:chr3H:449190904-449191027:449190904-449191114:+"; transcript_id "A3:chr3H:449190904-449191027:449190904-449191114:+:alternative1";
chr3H	PanBaRT20_trans_aveTPM10.gtf	exon	449190804	449190904	.	+	.	gene_id "A3:chr3H:449190904-449191027:449190904-449191114:+"; transcript_id "A3:chr3H:449190904-449191027:449190904-449191114:+:alternative2";
chr3H	PanBaRT20_trans_aveTPM10.gtf	exon	449191114	449191214	.	+	.	gene_id "A3:chr3H:449190904-449191027:449190904-449191114:+"; transcript_id "A3:chr3H:449190904-449191027:449190904-449191114:+:alternative2";
chr3H	PanBaRT20_trans_aveTPM10.gtf	exon	488139321	488139421	.	+	.	gene_id "A3:chr3H:488139421-488139507:488139421-488139592:+"; transcript_id "A3:chr3H:488139421-488139507:488139421-488139592:+:alternative1";
chr3H	PanBaRT20_trans_aveTPM10.gtf	exon	488139507	488139692	.	+	.	gene_id "A3:chr3H:488139421-488139507:488139421-488139592:+"; transcript_id "A3:chr3H:488139421-488139507:488139421-488139592:+:alternative1";
chr3H	PanBaRT20_trans_aveTPM10.gtf	exon	488139321	488139421	.	+	.	gene_id "A3:chr3H:488139421-488139507:488139421-488139592:+"; transcript_id "A3:chr3H:488139421-488139507:488139421-488139592:+:alternative2";
chr3H	PanBaRT20_trans_aveTPM10.gtf	exon	488139592	488139692	.	+	.	gene_id "A3:chr3H:488139421-488139507:488139421-488139592:+"; transcript_id "A3:chr3H:488139421-488139507:488139421-488139592:+:alternative2";
chr3H	PanBaRT20_trans_aveTPM10.gtf	exon	529189552	529189652	.	+	.	gene_id "A3:chr3H:529189652-529189721:529189652-529189752:+"; transcript_id "A3:chr3H:529189652-529189721:529189652-529189752:+:alternative1";
chr3H	PanBaRT20_trans_aveTPM10.gtf	exon	529189721	529189852	.	+	.	gene_id "A3:chr3H:529189652-529189721:529189652-529189752:+"; transcript_id "A3:chr3H:529189652-529189721:529189652-529189752:+:alternative1";
chr3H	PanBaRT20_trans_aveTPM10.gtf	exon	529189552	529189652	.	+	.	gene_id "A3:chr3H:529189652-529189721:529189652-529189752:+"; transcript_id "A3:chr3H:529189652-529189721:529189652-529189752:+:alternative2";
chr3H	PanBaRT20_trans_aveTPM10.gtf	exon	529189752	529189852	.	+	.	gene_id "A3:chr3H:529189652-529189721:529189652-529189752:+"; transcript_id "A3:chr3H:529189652-529189721:529189652-529189752:+:alternative2";
chr3H	PanBaRT20_trans_aveTPM10.gtf	exon	530128827	530128927	.	+	.	gene_id "A3:chr3H:530128927-530129019:530128927-530129023:+"; transcript_id "A3:chr3H:530128927-530129019:530128927-530129023:+:alternative1";
chr3H	PanBaRT20_trans_aveTPM10.gtf	exon	530129019	530129123	.	+	.	gene_id "A3:chr3H:530128927-530129019:530128927-530129023:+"; transcript_id "A3:chr3H:530128927-530129019:530128927-530129023:+:alternative1";
chr3H	PanBaRT20_trans_aveTPM10.gtf	exon	530128827	530128927	.	+	.	gene_id "A3:chr3H:530128927-530129019:530128927-530129023:+"; transcript_id "A3:chr3H:530128927-530129019:530128927-530129023:+:alternative2";
chr3H	PanBaRT20_trans_aveTPM10.gtf	exon	530129023	530129123	.	+	.	gene_id "A3:chr3H:530128927-530129019:530128927-530129023:+"; transcript_id "A3:chr3H:530128927-530129019:530128927-530129023:+:alternative2";
chr3H	PanBaRT20_trans_aveTPM10.gtf	exon	556325535	556325635	.	+	.	gene_id "A3:chr3H:556325635-556325975:556325635-556326006:+"; transcript_id "A3:chr3H:556325635-556325975:556325635-556326006:+:alternative1";
chr3H	PanBaRT20_trans_aveTPM10.gtf	exon	556325975	556326106	.	+	.	gene_id "A3:chr3H:556325635-556325975:556325635-556326006:+"; transcript_id "A3:chr3H:556325635-556325975:556325635-556326006:+:alternative1";
chr3H	PanBaRT20_trans_aveTPM10.gtf	exon	556325535	556325635	.	+	.	gene_id "A3:chr3H:556325635-556325975:556325635-556326006:+"; transcript_id "A3:chr3H:556325635-556325975:556325635-556326006:+:alternative2";
chr3H	PanBaRT20_trans_aveTPM10.gtf	exon	556326006	556326106	.	+	.	gene_id "A3:chr3H:556325635-556325975:556325635-556326006:+"; transcript_id "A3:chr3H:556325635-556325975:556325635-556326006:+:alternative2";
chr3H	PanBaRT20_trans_aveTPM10.gtf	exon	563545152	563545252	.	+	.	gene_id "A3:chr3H:563545252-563546440:563545252-563546444:+"; transcript_id "A3:chr3H:563545252-563546440:563545252-563546444:+:alternative1";
chr3H	PanBaRT20_trans_aveTPM10.gtf	exon	563546440	563546544	.	+	.	gene_id "A3:chr3H:563545252-563546440:563545252-563546444:+"; transcript_id "A3:chr3H:563545252-563546440:563545252-563546444:+:alternative1";
chr3H	PanBaRT20_trans_aveTPM10.gtf	exon	563545152	563545252	.	+	.	gene_id "A3:chr3H:563545252-563546440:563545252-563546444:+"; transcript_id "A3:chr3H:563545252-563546440:563545252-563546444:+:alternative2";
chr3H	PanBaRT20_trans_aveTPM10.gtf	exon	563546444	563546544	.	+	.	gene_id "A3:chr3H:563545252-563546440:563545252-563546444:+"; transcript_id "A3:chr3H:563545252-563546440:563545252-563546444:+:alternative2";
chr3H	PanBaRT20_trans_aveTPM10.gtf	exon	565855849	565855949	.	+	.	gene_id "A3:chr3H:565855949-565856101:565855949-565856171:+"; transcript_id "A3:chr3H:565855949-565856101:565855949-565856171:+:alternative1";
chr3H	PanBaRT20_trans_aveTPM10.gtf	exon	565856101	565856271	.	+	.	gene_id "A3:chr3H:565855949-565856101:565855949-565856171:+"; transcript_id "A3:chr3H:565855949-565856101:565855949-565856171:+:alternative1";
chr3H	PanBaRT20_trans_aveTPM10.gtf	exon	565855849	565855949	.	+	.	gene_id "A3:chr3H:565855949-565856101:565855949-565856171:+"; transcript_id "A3:chr3H:565855949-565856101:565855949-565856171:+:alternative2";
chr3H	PanBaRT20_trans_aveTPM10.gtf	exon	565856171	565856271	.	+	.	gene_id "A3:chr3H:565855949-565856101:565855949-565856171:+"; transcript_id "A3:chr3H:565855949-565856101:565855949-565856171:+:alternative2";
chr3H	PanBaRT20_trans_aveTPM10.gtf	exon	610491523	610491623	.	+	.	gene_id "A3:chr3H:610491623-610492122:610491623-610492202:+"; transcript_id "A3:chr3H:610491623-610492122:610491623-610492202:+:alternative1";
chr3H	PanBaRT20_trans_aveTPM10.gtf	exon	610492122	610492302	.	+	.	gene_id "A3:chr3H:610491623-610492122:610491623-610492202:+"; transcript_id "A3:chr3H:610491623-610492122:610491623-610492202:+:alternative1";
chr3H	PanBaRT20_trans_aveTPM10.gtf	exon	610491523	610491623	.	+	.	gene_id "A3:chr3H:610491623-610492122:610491623-610492202:+"; transcript_id "A3:chr3H:610491623-610492122:610491623-610492202:+:alternative2";
chr3H	PanBaRT20_trans_aveTPM10.gtf	exon	610492202	610492302	.	+	.	gene_id "A3:chr3H:610491623-610492122:610491623-610492202:+"; transcript_id "A3:chr3H:610491623-610492122:610491623-610492202:+:alternative2";
chr3H	PanBaRT20_trans_aveTPM10.gtf	exon	617862584	617862684	.	+	.	gene_id "A3:chr3H:617862684-617865254:617862684-617865320:+"; transcript_id "A3:chr3H:617862684-617865254:617862684-617865320:+:alternative1";
chr3H	PanBaRT20_trans_aveTPM10.gtf	exon	617865254	617865420	.	+	.	gene_id "A3:chr3H:617862684-617865254:617862684-617865320:+"; transcript_id "A3:chr3H:617862684-617865254:617862684-617865320:+:alternative1";
chr3H	PanBaRT20_trans_aveTPM10.gtf	exon	617862584	617862684	.	+	.	gene_id "A3:chr3H:617862684-617865254:617862684-617865320:+"; transcript_id "A3:chr3H:617862684-617865254:617862684-617865320:+:alternative2";
chr3H	PanBaRT20_trans_aveTPM10.gtf	exon	617865320	617865420	.	+	.	gene_id "A3:chr3H:617862684-617865254:617862684-617865320:+"; transcript_id "A3:chr3H:617862684-617865254:617862684-617865320:+:alternative2";
chr3H	PanBaRT20_trans_aveTPM10.gtf	exon	661949138	661949238	.	+	.	gene_id "A3:chr3H:661949238-661949323:661949238-661949326:+"; transcript_id "A3:chr3H:661949238-661949323:661949238-661949326:+:alternative1";
chr3H	PanBaRT20_trans_aveTPM10.gtf	exon	661949323	661949426	.	+	.	gene_id "A3:chr3H:661949238-661949323:661949238-661949326:+"; transcript_id "A3:chr3H:661949238-661949323:661949238-661949326:+:alternative1";
chr3H	PanBaRT20_trans_aveTPM10.gtf	exon	661949138	661949238	.	+	.	gene_id "A3:chr3H:661949238-661949323:661949238-661949326:+"; transcript_id "A3:chr3H:661949238-661949323:661949238-661949326:+:alternative2";
chr3H	PanBaRT20_trans_aveTPM10.gtf	exon	661949326	661949426	.	+	.	gene_id "A3:chr3H:661949238-661949323:661949238-661949326:+"; transcript_id "A3:chr3H:661949238-661949323:661949238-661949326:+:alternative2";
chr4H	PanBaRT20_trans_aveTPM10.gtf	exon	16329025	16329290	.	-	.	gene_id "A3:chr4H:16329290-16329442:16329125-16329442:-"; transcript_id "A3:chr4H:16329290-16329442:16329125-16329442:-:alternative1";
chr4H	PanBaRT20_trans_aveTPM10.gtf	exon	16329442	16329542	.	-	.	gene_id "A3:chr4H:16329290-16329442:16329125-16329442:-"; transcript_id "A3:chr4H:16329290-16329442:16329125-16329442:-:alternative1";
chr4H	PanBaRT20_trans_aveTPM10.gtf	exon	16329025	16329125	.	-	.	gene_id "A3:chr4H:16329290-16329442:16329125-16329442:-"; transcript_id "A3:chr4H:16329290-16329442:16329125-16329442:-:alternative2";
chr4H	PanBaRT20_trans_aveTPM10.gtf	exon	16329442	16329542	.	-	.	gene_id "A3:chr4H:16329290-16329442:16329125-16329442:-"; transcript_id "A3:chr4H:16329290-16329442:16329125-16329442:-:alternative2";
chr4H	PanBaRT20_trans_aveTPM10.gtf	exon	16639552	16639676	.	-	.	gene_id "A3:chr4H:16639676-16640055:16639652-16640055:-"; transcript_id "A3:chr4H:16639676-16640055:16639652-16640055:-:alternative1";
chr4H	PanBaRT20_trans_aveTPM10.gtf	exon	16640055	16640155	.	-	.	gene_id "A3:chr4H:16639676-16640055:16639652-16640055:-"; transcript_id "A3:chr4H:16639676-16640055:16639652-16640055:-:alternative1";
chr4H	PanBaRT20_trans_aveTPM10.gtf	exon	16639552	16639652	.	-	.	gene_id "A3:chr4H:16639676-16640055:16639652-16640055:-"; transcript_id "A3:chr4H:16639676-16640055:16639652-16640055:-:alternative2";
chr4H	PanBaRT20_trans_aveTPM10.gtf	exon	16640055	16640155	.	-	.	gene_id "A3:chr4H:16639676-16640055:16639652-16640055:-"; transcript_id "A3:chr4H:16639676-16640055:16639652-16640055:-:alternative2";
chr4H	PanBaRT20_trans_aveTPM10.gtf	exon	33246346	33246452	.	-	.	gene_id "A3:chr4H:33246452-33247820:33246446-33247820:-"; transcript_id "A3:chr4H:33246452-33247820:33246446-33247820:-:alternative1";
chr4H	PanBaRT20_trans_aveTPM10.gtf	exon	33247820	33247920	.	-	.	gene_id "A3:chr4H:33246452-33247820:33246446-33247820:-"; transcript_id "A3:chr4H:33246452-33247820:33246446-33247820:-:alternative1";
chr4H	PanBaRT20_trans_aveTPM10.gtf	exon	33246346	33246446	.	-	.	gene_id "A3:chr4H:33246452-33247820:33246446-33247820:-"; transcript_id "A3:chr4H:33246452-33247820:33246446-33247820:-:alternative2";
chr4H	PanBaRT20_trans_aveTPM10.gtf	exon	33247820	33247920	.	-	.	gene_id "A3:chr4H:33246452-33247820:33246446-33247820:-"; transcript_id "A3:chr4H:33246452-33247820:33246446-33247820:-:alternative2";
chr4H	PanBaRT20_trans_aveTPM10.gtf	exon	65309073	65309179	.	-	.	gene_id "A3:chr4H:65309179-65309251:65309173-65309251:-"; transcript_id "A3:chr4H:65309179-65309251:65309173-65309251:-:alternative1";
chr4H	PanBaRT20_trans_aveTPM10.gtf	exon	65309251	65309351	.	-	.	gene_id "A3:chr4H:65309179-65309251:65309173-65309251:-"; transcript_id "A3:chr4H:65309179-65309251:65309173-65309251:-:alternative1";
chr4H	PanBaRT20_trans_aveTPM10.gtf	exon	65309073	65309173	.	-	.	gene_id "A3:chr4H:65309179-65309251:65309173-65309251:-"; transcript_id "A3:chr4H:65309179-65309251:65309173-65309251:-:alternative2";
chr4H	PanBaRT20_trans_aveTPM10.gtf	exon	65309251	65309351	.	-	.	gene_id "A3:chr4H:65309179-65309251:65309173-65309251:-"; transcript_id "A3:chr4H:65309179-65309251:65309173-65309251:-:alternative2";
chr4H	PanBaRT20_trans_aveTPM10.gtf	exon	77634750	77634860	.	-	.	gene_id "A3:chr4H:77634860-77635604:77634850-77635604:-"; transcript_id "A3:chr4H:77634860-77635604:77634850-77635604:-:alternative1";
chr4H	PanBaRT20_trans_aveTPM10.gtf	exon	77635604	77635704	.	-	.	gene_id "A3:chr4H:77634860-77635604:77634850-77635604:-"; transcript_id "A3:chr4H:77634860-77635604:77634850-77635604:-:alternative1";
chr4H	PanBaRT20_trans_aveTPM10.gtf	exon	77634750	77634850	.	-	.	gene_id "A3:chr4H:77634860-77635604:77634850-77635604:-"; transcript_id "A3:chr4H:77634860-77635604:77634850-77635604:-:alternative2";
chr4H	PanBaRT20_trans_aveTPM10.gtf	exon	77635604	77635704	.	-	.	gene_id "A3:chr4H:77634860-77635604:77634850-77635604:-"; transcript_id "A3:chr4H:77634860-77635604:77634850-77635604:-:alternative2";
chr4H	PanBaRT20_trans_aveTPM10.gtf	exon	153736330	153736435	.	-	.	gene_id "A3:chr4H:153736435-153737476:153736430-153737476:-"; transcript_id "A3:chr4H:153736435-153737476:153736430-153737476:-:alternative1";
chr4H	PanBaRT20_trans_aveTPM10.gtf	exon	153737476	153737576	.	-	.	gene_id "A3:chr4H:153736435-153737476:153736430-153737476:-"; transcript_id "A3:chr4H:153736435-153737476:153736430-153737476:-:alternative1";
chr4H	PanBaRT20_trans_aveTPM10.gtf	exon	153736330	153736430	.	-	.	gene_id "A3:chr4H:153736435-153737476:153736430-153737476:-"; transcript_id "A3:chr4H:153736435-153737476:153736430-153737476:-:alternative2";
chr4H	PanBaRT20_trans_aveTPM10.gtf	exon	153737476	153737576	.	-	.	gene_id "A3:chr4H:153736435-153737476:153736430-153737476:-"; transcript_id "A3:chr4H:153736435-153737476:153736430-153737476:-:alternative2";
chr4H	PanBaRT20_trans_aveTPM10.gtf	exon	287017969	287018076	.	-	.	gene_id "A3:chr4H:287018076-287018714:287018069-287018714:-"; transcript_id "A3:chr4H:287018076-287018714:287018069-287018714:-:alternative1";
chr4H	PanBaRT20_trans_aveTPM10.gtf	exon	287018714	287018814	.	-	.	gene_id "A3:chr4H:287018076-287018714:287018069-287018714:-"; transcript_id "A3:chr4H:287018076-287018714:287018069-287018714:-:alternative1";
chr4H	PanBaRT20_trans_aveTPM10.gtf	exon	287017969	287018069	.	-	.	gene_id "A3:chr4H:287018076-287018714:287018069-287018714:-"; transcript_id "A3:chr4H:287018076-287018714:287018069-287018714:-:alternative2";
chr4H	PanBaRT20_trans_aveTPM10.gtf	exon	287018714	287018814	.	-	.	gene_id "A3:chr4H:287018076-287018714:287018069-287018714:-"; transcript_id "A3:chr4H:287018076-287018714:287018069-287018714:-:alternative2";
chr4H	PanBaRT20_trans_aveTPM10.gtf	exon	287021367	287021482	.	-	.	gene_id "A3:chr4H:287021482-287021599:287021467-287021599:-"; transcript_id "A3:chr4H:287021482-287021599:287021467-287021599:-:alternative1";
chr4H	PanBaRT20_trans_aveTPM10.gtf	exon	287021599	287021699	.	-	.	gene_id "A3:chr4H:287021482-287021599:287021467-287021599:-"; transcript_id "A3:chr4H:287021482-287021599:287021467-287021599:-:alternative1";
chr4H	PanBaRT20_trans_aveTPM10.gtf	exon	287021367	287021467	.	-	.	gene_id "A3:chr4H:287021482-287021599:287021467-287021599:-"; transcript_id "A3:chr4H:287021482-287021599:287021467-287021599:-:alternative2";
chr4H	PanBaRT20_trans_aveTPM10.gtf	exon	287021599	287021699	.	-	.	gene_id "A3:chr4H:287021482-287021599:287021467-287021599:-"; transcript_id "A3:chr4H:287021482-287021599:287021467-287021599:-:alternative2";
chr4H	PanBaRT20_trans_aveTPM10.gtf	exon	504470161	504470296	.	-	.	gene_id "A3:chr4H:504470296-504470380:504470261-504470380:-"; transcript_id "A3:chr4H:504470296-504470380:504470261-504470380:-:alternative1";
chr4H	PanBaRT20_trans_aveTPM10.gtf	exon	504470380	504470480	.	-	.	gene_id "A3:chr4H:504470296-504470380:504470261-504470380:-"; transcript_id "A3:chr4H:504470296-504470380:504470261-504470380:-:alternative1";
chr4H	PanBaRT20_trans_aveTPM10.gtf	exon	504470161	504470261	.	-	.	gene_id "A3:chr4H:504470296-504470380:504470261-504470380:-"; transcript_id "A3:chr4H:504470296-504470380:504470261-504470380:-:alternative2";
chr4H	PanBaRT20_trans_aveTPM10.gtf	exon	504470380	504470480	.	-	.	gene_id "A3:chr4H:504470296-504470380:504470261-504470380:-"; transcript_id "A3:chr4H:504470296-504470380:504470261-504470380:-:alternative2";
chr4H	PanBaRT20_trans_aveTPM10.gtf	exon	587760336	587760439	.	-	.	gene_id "A3:chr4H:587760439-587760550:587760436-587760550:-"; transcript_id "A3:chr4H:587760439-587760550:587760436-587760550:-:alternative1";
chr4H	PanBaRT20_trans_aveTPM10.gtf	exon	587760550	587760650	.	-	.	gene_id "A3:chr4H:587760439-587760550:587760436-587760550:-"; transcript_id "A3:chr4H:587760439-587760550:587760436-587760550:-:alternative1";
chr4H	PanBaRT20_trans_aveTPM10.gtf	exon	587760336	587760436	.	-	.	gene_id "A3:chr4H:587760439-587760550:587760436-587760550:-"; transcript_id "A3:chr4H:587760439-587760550:587760436-587760550:-:alternative2";
chr4H	PanBaRT20_trans_aveTPM10.gtf	exon	587760550	587760650	.	-	.	gene_id "A3:chr4H:587760439-587760550:587760436-587760550:-"; transcript_id "A3:chr4H:587760439-587760550:587760436-587760550:-:alternative2";
chr4H	PanBaRT20_trans_aveTPM10.gtf	exon	594522100	594522224	.	-	.	gene_id "A3:chr4H:594522224-594522300:594522200-594522300:-"; transcript_id "A3:chr4H:594522224-594522300:594522200-594522300:-:alternative1";
chr4H	PanBaRT20_trans_aveTPM10.gtf	exon	594522300	594522400	.	-	.	gene_id "A3:chr4H:594522224-594522300:594522200-594522300:-"; transcript_id "A3:chr4H:594522224-594522300:594522200-594522300:-:alternative1";
chr4H	PanBaRT20_trans_aveTPM10.gtf	exon	594522100	594522200	.	-	.	gene_id "A3:chr4H:594522224-594522300:594522200-594522300:-"; transcript_id "A3:chr4H:594522224-594522300:594522200-594522300:-:alternative2";
chr4H	PanBaRT20_trans_aveTPM10.gtf	exon	594522300	594522400	.	-	.	gene_id "A3:chr4H:594522224-594522300:594522200-594522300:-"; transcript_id "A3:chr4H:594522224-594522300:594522200-594522300:-:alternative2";
chr4H	PanBaRT20_trans_aveTPM10.gtf	exon	628401365	628401501	.	-	.	gene_id "A3:chr4H:628401501-628401597:628401465-628401597:-"; transcript_id "A3:chr4H:628401501-628401597:628401465-628401597:-:alternative1";
chr4H	PanBaRT20_trans_aveTPM10.gtf	exon	628401597	628401697	.	-	.	gene_id "A3:chr4H:628401501-628401597:628401465-628401597:-"; transcript_id "A3:chr4H:628401501-628401597:628401465-628401597:-:alternative1";
chr4H	PanBaRT20_trans_aveTPM10.gtf	exon	628401365	628401465	.	-	.	gene_id "A3:chr4H:628401501-628401597:628401465-628401597:-"; transcript_id "A3:chr4H:628401501-628401597:628401465-628401597:-:alternative2";
chr4H	PanBaRT20_trans_aveTPM10.gtf	exon	628401597	628401697	.	-	.	gene_id "A3:chr4H:628401501-628401597:628401465-628401597:-"; transcript_id "A3:chr4H:628401501-628401597:628401465-628401597:-:alternative2";
chr4H	PanBaRT20_trans_aveTPM10.gtf	exon	1679130	1679230	.	+	.	gene_id "A3:chr4H:1679230-1679328:1679230-1679334:+"; transcript_id "A3:chr4H:1679230-1679328:1679230-1679334:+:alternative1";
chr4H	PanBaRT20_trans_aveTPM10.gtf	exon	1679328	1679434	.	+	.	gene_id "A3:chr4H:1679230-1679328:1679230-1679334:+"; transcript_id "A3:chr4H:1679230-1679328:1679230-1679334:+:alternative1";
chr4H	PanBaRT20_trans_aveTPM10.gtf	exon	1679130	1679230	.	+	.	gene_id "A3:chr4H:1679230-1679328:1679230-1679334:+"; transcript_id "A3:chr4H:1679230-1679328:1679230-1679334:+:alternative2";
chr4H	PanBaRT20_trans_aveTPM10.gtf	exon	1679334	1679434	.	+	.	gene_id "A3:chr4H:1679230-1679328:1679230-1679334:+"; transcript_id "A3:chr4H:1679230-1679328:1679230-1679334:+:alternative2";
chr4H	PanBaRT20_trans_aveTPM10.gtf	exon	5316220	5316320	.	+	.	gene_id "A3:chr4H:5316320-5316430:5316320-5316435:+"; transcript_id "A3:chr4H:5316320-5316430:5316320-5316435:+:alternative1";
chr4H	PanBaRT20_trans_aveTPM10.gtf	exon	5316430	5316535	.	+	.	gene_id "A3:chr4H:5316320-5316430:5316320-5316435:+"; transcript_id "A3:chr4H:5316320-5316430:5316320-5316435:+:alternative1";
chr4H	PanBaRT20_trans_aveTPM10.gtf	exon	5316220	5316320	.	+	.	gene_id "A3:chr4H:5316320-5316430:5316320-5316435:+"; transcript_id "A3:chr4H:5316320-5316430:5316320-5316435:+:alternative2";
chr4H	PanBaRT20_trans_aveTPM10.gtf	exon	5316435	5316535	.	+	.	gene_id "A3:chr4H:5316320-5316430:5316320-5316435:+"; transcript_id "A3:chr4H:5316320-5316430:5316320-5316435:+:alternative2";
chr4H	PanBaRT20_trans_aveTPM10.gtf	exon	7570195	7570295	.	+	.	gene_id "A3:chr4H:7570295-7570353:7570295-7570384:+"; transcript_id "A3:chr4H:7570295-7570353:7570295-7570384:+:alternative1";
chr4H	PanBaRT20_trans_aveTPM10.gtf	exon	7570353	7570484	.	+	.	gene_id "A3:chr4H:7570295-7570353:7570295-7570384:+"; transcript_id "A3:chr4H:7570295-7570353:7570295-7570384:+:alternative1";
chr4H	PanBaRT20_trans_aveTPM10.gtf	exon	7570195	7570295	.	+	.	gene_id "A3:chr4H:7570295-7570353:7570295-7570384:+"; transcript_id "A3:chr4H:7570295-7570353:7570295-7570384:+:alternative2";
chr4H	PanBaRT20_trans_aveTPM10.gtf	exon	7570384	7570484	.	+	.	gene_id "A3:chr4H:7570295-7570353:7570295-7570384:+"; transcript_id "A3:chr4H:7570295-7570353:7570295-7570384:+:alternative2";
chr4H	PanBaRT20_trans_aveTPM10.gtf	exon	23446897	23446997	.	+	.	gene_id "A3:chr4H:23446997-23447626:23446997-23447632:+"; transcript_id "A3:chr4H:23446997-23447626:23446997-23447632:+:alternative1";
chr4H	PanBaRT20_trans_aveTPM10.gtf	exon	23447626	23447732	.	+	.	gene_id "A3:chr4H:23446997-23447626:23446997-23447632:+"; transcript_id "A3:chr4H:23446997-23447626:23446997-23447632:+:alternative1";
chr4H	PanBaRT20_trans_aveTPM10.gtf	exon	23446897	23446997	.	+	.	gene_id "A3:chr4H:23446997-23447626:23446997-23447632:+"; transcript_id "A3:chr4H:23446997-23447626:23446997-23447632:+:alternative2";
chr4H	PanBaRT20_trans_aveTPM10.gtf	exon	23447632	23447732	.	+	.	gene_id "A3:chr4H:23446997-23447626:23446997-23447632:+"; transcript_id "A3:chr4H:23446997-23447626:23446997-23447632:+:alternative2";
chr4H	PanBaRT20_trans_aveTPM10.gtf	exon	49273654	49273754	.	+	.	gene_id "A3:chr4H:49273754-49274088:49273754-49274095:+"; transcript_id "A3:chr4H:49273754-49274088:49273754-49274095:+:alternative1";
chr4H	PanBaRT20_trans_aveTPM10.gtf	exon	49274088	49274195	.	+	.	gene_id "A3:chr4H:49273754-49274088:49273754-49274095:+"; transcript_id "A3:chr4H:49273754-49274088:49273754-49274095:+:alternative1";
chr4H	PanBaRT20_trans_aveTPM10.gtf	exon	49273654	49273754	.	+	.	gene_id "A3:chr4H:49273754-49274088:49273754-49274095:+"; transcript_id "A3:chr4H:49273754-49274088:49273754-49274095:+:alternative2";
chr4H	PanBaRT20_trans_aveTPM10.gtf	exon	49274095	49274195	.	+	.	gene_id "A3:chr4H:49273754-49274088:49273754-49274095:+"; transcript_id "A3:chr4H:49273754-49274088:49273754-49274095:+:alternative2";
chr4H	PanBaRT20_trans_aveTPM10.gtf	exon	55308749	55308849	.	+	.	gene_id "A3:chr4H:55308849-55309073:55308849-55309125:+"; transcript_id "A3:chr4H:55308849-55309073:55308849-55309125:+:alternative1";
chr4H	PanBaRT20_trans_aveTPM10.gtf	exon	55309073	55309225	.	+	.	gene_id "A3:chr4H:55308849-55309073:55308849-55309125:+"; transcript_id "A3:chr4H:55308849-55309073:55308849-55309125:+:alternative1";
chr4H	PanBaRT20_trans_aveTPM10.gtf	exon	55308749	55308849	.	+	.	gene_id "A3:chr4H:55308849-55309073:55308849-55309125:+"; transcript_id "A3:chr4H:55308849-55309073:55308849-55309125:+:alternative2";
chr4H	PanBaRT20_trans_aveTPM10.gtf	exon	55309125	55309225	.	+	.	gene_id "A3:chr4H:55308849-55309073:55308849-55309125:+"; transcript_id "A3:chr4H:55308849-55309073:55308849-55309125:+:alternative2";
chr4H	PanBaRT20_trans_aveTPM10.gtf	exon	56851842	56851942	.	+	.	gene_id "A3:chr4H:56851942-56852754:56851942-56852766:+"; transcript_id "A3:chr4H:56851942-56852754:56851942-56852766:+:alternative1";
chr4H	PanBaRT20_trans_aveTPM10.gtf	exon	56852754	56852866	.	+	.	gene_id "A3:chr4H:56851942-56852754:56851942-56852766:+"; transcript_id "A3:chr4H:56851942-56852754:56851942-56852766:+:alternative1";
chr4H	PanBaRT20_trans_aveTPM10.gtf	exon	56851842	56851942	.	+	.	gene_id "A3:chr4H:56851942-56852754:56851942-56852766:+"; transcript_id "A3:chr4H:56851942-56852754:56851942-56852766:+:alternative2";
chr4H	PanBaRT20_trans_aveTPM10.gtf	exon	56852766	56852866	.	+	.	gene_id "A3:chr4H:56851942-56852754:56851942-56852766:+"; transcript_id "A3:chr4H:56851942-56852754:56851942-56852766:+:alternative2";
chr4H	PanBaRT20_trans_aveTPM10.gtf	exon	99971423	99971523	.	+	.	gene_id "A3:chr4H:99971523-99971710:99971523-99971720:+"; transcript_id "A3:chr4H:99971523-99971710:99971523-99971720:+:alternative1";
chr4H	PanBaRT20_trans_aveTPM10.gtf	exon	99971710	99971820	.	+	.	gene_id "A3:chr4H:99971523-99971710:99971523-99971720:+"; transcript_id "A3:chr4H:99971523-99971710:99971523-99971720:+:alternative1";
chr4H	PanBaRT20_trans_aveTPM10.gtf	exon	99971423	99971523	.	+	.	gene_id "A3:chr4H:99971523-99971710:99971523-99971720:+"; transcript_id "A3:chr4H:99971523-99971710:99971523-99971720:+:alternative2";
chr4H	PanBaRT20_trans_aveTPM10.gtf	exon	99971720	99971820	.	+	.	gene_id "A3:chr4H:99971523-99971710:99971523-99971720:+"; transcript_id "A3:chr4H:99971523-99971710:99971523-99971720:+:alternative2";
chr4H	PanBaRT20_trans_aveTPM10.gtf	exon	241995665	241995765	.	+	.	gene_id "A3:chr4H:241995765-241995830:241995765-241995864:+"; transcript_id "A3:chr4H:241995765-241995830:241995765-241995864:+:alternative1";
chr4H	PanBaRT20_trans_aveTPM10.gtf	exon	241995830	241995964	.	+	.	gene_id "A3:chr4H:241995765-241995830:241995765-241995864:+"; transcript_id "A3:chr4H:241995765-241995830:241995765-241995864:+:alternative1";
chr4H	PanBaRT20_trans_aveTPM10.gtf	exon	241995665	241995765	.	+	.	gene_id "A3:chr4H:241995765-241995830:241995765-241995864:+"; transcript_id "A3:chr4H:241995765-241995830:241995765-241995864:+:alternative2";
chr4H	PanBaRT20_trans_aveTPM10.gtf	exon	241995864	241995964	.	+	.	gene_id "A3:chr4H:241995765-241995830:241995765-241995864:+"; transcript_id "A3:chr4H:241995765-241995830:241995765-241995864:+:alternative2";
chr4H	PanBaRT20_trans_aveTPM10.gtf	exon	256099485	256099585	.	+	.	gene_id "A3:chr4H:256099585-256099704:256099585-256099709:+"; transcript_id "A3:chr4H:256099585-256099704:256099585-256099709:+:alternative1";
chr4H	PanBaRT20_trans_aveTPM10.gtf	exon	256099704	256099809	.	+	.	gene_id "A3:chr4H:256099585-256099704:256099585-256099709:+"; transcript_id "A3:chr4H:256099585-256099704:256099585-256099709:+:alternative1";
chr4H	PanBaRT20_trans_aveTPM10.gtf	exon	256099485	256099585	.	+	.	gene_id "A3:chr4H:256099585-256099704:256099585-256099709:+"; transcript_id "A3:chr4H:256099585-256099704:256099585-256099709:+:alternative2";
chr4H	PanBaRT20_trans_aveTPM10.gtf	exon	256099709	256099809	.	+	.	gene_id "A3:chr4H:256099585-256099704:256099585-256099709:+"; transcript_id "A3:chr4H:256099585-256099704:256099585-256099709:+:alternative2";
chr4H	PanBaRT20_trans_aveTPM10.gtf	exon	317689089	317689189	.	+	.	gene_id "A3:chr4H:317689189-317693250:317689189-317693260:+"; transcript_id "A3:chr4H:317689189-317693250:317689189-317693260:+:alternative1";
chr4H	PanBaRT20_trans_aveTPM10.gtf	exon	317693250	317693360	.	+	.	gene_id "A3:chr4H:317689189-317693250:317689189-317693260:+"; transcript_id "A3:chr4H:317689189-317693250:317689189-317693260:+:alternative1";
chr4H	PanBaRT20_trans_aveTPM10.gtf	exon	317689089	317689189	.	+	.	gene_id "A3:chr4H:317689189-317693250:317689189-317693260:+"; transcript_id "A3:chr4H:317689189-317693250:317689189-317693260:+:alternative2";
chr4H	PanBaRT20_trans_aveTPM10.gtf	exon	317693260	317693360	.	+	.	gene_id "A3:chr4H:317689189-317693250:317689189-317693260:+"; transcript_id "A3:chr4H:317689189-317693250:317689189-317693260:+:alternative2";
chr4H	PanBaRT20_trans_aveTPM10.gtf	exon	403908078	403908178	.	+	.	gene_id "A3:chr4H:403908178-403908976:403908178-403908981:+"; transcript_id "A3:chr4H:403908178-403908976:403908178-403908981:+:alternative1";
chr4H	PanBaRT20_trans_aveTPM10.gtf	exon	403908976	403909081	.	+	.	gene_id "A3:chr4H:403908178-403908976:403908178-403908981:+"; transcript_id "A3:chr4H:403908178-403908976:403908178-403908981:+:alternative1";
chr4H	PanBaRT20_trans_aveTPM10.gtf	exon	403908078	403908178	.	+	.	gene_id "A3:chr4H:403908178-403908976:403908178-403908981:+"; transcript_id "A3:chr4H:403908178-403908976:403908178-403908981:+:alternative2";
chr4H	PanBaRT20_trans_aveTPM10.gtf	exon	403908981	403909081	.	+	.	gene_id "A3:chr4H:403908178-403908976:403908178-403908981:+"; transcript_id "A3:chr4H:403908178-403908976:403908178-403908981:+:alternative2";
chr4H	PanBaRT20_trans_aveTPM10.gtf	exon	436674665	436674765	.	+	.	gene_id "A3:chr4H:436674765-436675016:436674765-436675019:+"; transcript_id "A3:chr4H:436674765-436675016:436674765-436675019:+:alternative1";
chr4H	PanBaRT20_trans_aveTPM10.gtf	exon	436675016	436675119	.	+	.	gene_id "A3:chr4H:436674765-436675016:436674765-436675019:+"; transcript_id "A3:chr4H:436674765-436675016:436674765-436675019:+:alternative1";
chr4H	PanBaRT20_trans_aveTPM10.gtf	exon	436674665	436674765	.	+	.	gene_id "A3:chr4H:436674765-436675016:436674765-436675019:+"; transcript_id "A3:chr4H:436674765-436675016:436674765-436675019:+:alternative2";
chr4H	PanBaRT20_trans_aveTPM10.gtf	exon	436675019	436675119	.	+	.	gene_id "A3:chr4H:436674765-436675016:436674765-436675019:+"; transcript_id "A3:chr4H:436674765-436675016:436674765-436675019:+:alternative2";
chr4H	PanBaRT20_trans_aveTPM10.gtf	exon	474674119	474674219	.	+	.	gene_id "A3:chr4H:474674219-474674849:474674219-474674869:+"; transcript_id "A3:chr4H:474674219-474674849:474674219-474674869:+:alternative1";
chr4H	PanBaRT20_trans_aveTPM10.gtf	exon	474674849	474674969	.	+	.	gene_id "A3:chr4H:474674219-474674849:474674219-474674869:+"; transcript_id "A3:chr4H:474674219-474674849:474674219-474674869:+:alternative1";
chr4H	PanBaRT20_trans_aveTPM10.gtf	exon	474674119	474674219	.	+	.	gene_id "A3:chr4H:474674219-474674849:474674219-474674869:+"; transcript_id "A3:chr4H:474674219-474674849:474674219-474674869:+:alternative2";
chr4H	PanBaRT20_trans_aveTPM10.gtf	exon	474674869	474674969	.	+	.	gene_id "A3:chr4H:474674219-474674849:474674219-474674869:+"; transcript_id "A3:chr4H:474674219-474674849:474674219-474674869:+:alternative2";
chr4H	PanBaRT20_trans_aveTPM10.gtf	exon	477169716	477169816	.	+	.	gene_id "A3:chr4H:477169816-477169912:477169816-477169915:+"; transcript_id "A3:chr4H:477169816-477169912:477169816-477169915:+:alternative1";
chr4H	PanBaRT20_trans_aveTPM10.gtf	exon	477169912	477170015	.	+	.	gene_id "A3:chr4H:477169816-477169912:477169816-477169915:+"; transcript_id "A3:chr4H:477169816-477169912:477169816-477169915:+:alternative1";
chr4H	PanBaRT20_trans_aveTPM10.gtf	exon	477169716	477169816	.	+	.	gene_id "A3:chr4H:477169816-477169912:477169816-477169915:+"; transcript_id "A3:chr4H:477169816-477169912:477169816-477169915:+:alternative2";
chr4H	PanBaRT20_trans_aveTPM10.gtf	exon	477169915	477170015	.	+	.	gene_id "A3:chr4H:477169816-477169912:477169816-477169915:+"; transcript_id "A3:chr4H:477169816-477169912:477169816-477169915:+:alternative2";
chr4H	PanBaRT20_trans_aveTPM10.gtf	exon	501747283	501747383	.	+	.	gene_id "A3:chr4H:501747383-501747867:501747383-501747904:+"; transcript_id "A3:chr4H:501747383-501747867:501747383-501747904:+:alternative1";
chr4H	PanBaRT20_trans_aveTPM10.gtf	exon	501747867	501748004	.	+	.	gene_id "A3:chr4H:501747383-501747867:501747383-501747904:+"; transcript_id "A3:chr4H:501747383-501747867:501747383-501747904:+:alternative1";
chr4H	PanBaRT20_trans_aveTPM10.gtf	exon	501747283	501747383	.	+	.	gene_id "A3:chr4H:501747383-501747867:501747383-501747904:+"; transcript_id "A3:chr4H:501747383-501747867:501747383-501747904:+:alternative2";
chr4H	PanBaRT20_trans_aveTPM10.gtf	exon	501747904	501748004	.	+	.	gene_id "A3:chr4H:501747383-501747867:501747383-501747904:+"; transcript_id "A3:chr4H:501747383-501747867:501747383-501747904:+:alternative2";
chr4H	PanBaRT20_trans_aveTPM10.gtf	exon	532106286	532106386	.	+	.	gene_id "A3:chr4H:532106386-532106888:532106386-532106891:+"; transcript_id "A3:chr4H:532106386-532106888:532106386-532106891:+:alternative1";
chr4H	PanBaRT20_trans_aveTPM10.gtf	exon	532106888	532106991	.	+	.	gene_id "A3:chr4H:532106386-532106888:532106386-532106891:+"; transcript_id "A3:chr4H:532106386-532106888:532106386-532106891:+:alternative1";
chr4H	PanBaRT20_trans_aveTPM10.gtf	exon	532106286	532106386	.	+	.	gene_id "A3:chr4H:532106386-532106888:532106386-532106891:+"; transcript_id "A3:chr4H:532106386-532106888:532106386-532106891:+:alternative2";
chr4H	PanBaRT20_trans_aveTPM10.gtf	exon	532106891	532106991	.	+	.	gene_id "A3:chr4H:532106386-532106888:532106386-532106891:+"; transcript_id "A3:chr4H:532106386-532106888:532106386-532106891:+:alternative2";
chr4H	PanBaRT20_trans_aveTPM10.gtf	exon	543149122	543149222	.	+	.	gene_id "A3:chr4H:543149222-543149307:543149222-543149331:+"; transcript_id "A3:chr4H:543149222-543149307:543149222-543149331:+:alternative1";
chr4H	PanBaRT20_trans_aveTPM10.gtf	exon	543149307	543149431	.	+	.	gene_id "A3:chr4H:543149222-543149307:543149222-543149331:+"; transcript_id "A3:chr4H:543149222-543149307:543149222-543149331:+:alternative1";
chr4H	PanBaRT20_trans_aveTPM10.gtf	exon	543149122	543149222	.	+	.	gene_id "A3:chr4H:543149222-543149307:543149222-543149331:+"; transcript_id "A3:chr4H:543149222-543149307:543149222-543149331:+:alternative2";
chr4H	PanBaRT20_trans_aveTPM10.gtf	exon	543149331	543149431	.	+	.	gene_id "A3:chr4H:543149222-543149307:543149222-543149331:+"; transcript_id "A3:chr4H:543149222-543149307:543149222-543149331:+:alternative2";
chr4H	PanBaRT20_trans_aveTPM10.gtf	exon	543148954	543149054	.	+	.	gene_id "A3:chr4H:543149054-543149105:543149054-543149127:+"; transcript_id "A3:chr4H:543149054-543149105:543149054-543149127:+:alternative1";
chr4H	PanBaRT20_trans_aveTPM10.gtf	exon	543149105	543149227	.	+	.	gene_id "A3:chr4H:543149054-543149105:543149054-543149127:+"; transcript_id "A3:chr4H:543149054-543149105:543149054-543149127:+:alternative1";
chr4H	PanBaRT20_trans_aveTPM10.gtf	exon	543148954	543149054	.	+	.	gene_id "A3:chr4H:543149054-543149105:543149054-543149127:+"; transcript_id "A3:chr4H:543149054-543149105:543149054-543149127:+:alternative2";
chr4H	PanBaRT20_trans_aveTPM10.gtf	exon	543149127	543149227	.	+	.	gene_id "A3:chr4H:543149054-543149105:543149054-543149127:+"; transcript_id "A3:chr4H:543149054-543149105:543149054-543149127:+:alternative2";
chr4H	PanBaRT20_trans_aveTPM10.gtf	exon	543149696	543149796	.	+	.	gene_id "A3:chr4H:543149796-543150305:543149796-543150318:+"; transcript_id "A3:chr4H:543149796-543150305:543149796-543150318:+:alternative1";
chr4H	PanBaRT20_trans_aveTPM10.gtf	exon	543150305	543150418	.	+	.	gene_id "A3:chr4H:543149796-543150305:543149796-543150318:+"; transcript_id "A3:chr4H:543149796-543150305:543149796-543150318:+:alternative1";
chr4H	PanBaRT20_trans_aveTPM10.gtf	exon	543149696	543149796	.	+	.	gene_id "A3:chr4H:543149796-543150305:543149796-543150318:+"; transcript_id "A3:chr4H:543149796-543150305:543149796-543150318:+:alternative2";
chr4H	PanBaRT20_trans_aveTPM10.gtf	exon	543150318	543150418	.	+	.	gene_id "A3:chr4H:543149796-543150305:543149796-543150318:+"; transcript_id "A3:chr4H:543149796-543150305:543149796-543150318:+:alternative2";
chr4H	PanBaRT20_trans_aveTPM10.gtf	exon	586189128	586189228	.	+	.	gene_id "A3:chr4H:586189228-586189307:586189228-586189310:+"; transcript_id "A3:chr4H:586189228-586189307:586189228-586189310:+:alternative1";
chr4H	PanBaRT20_trans_aveTPM10.gtf	exon	586189307	586189410	.	+	.	gene_id "A3:chr4H:586189228-586189307:586189228-586189310:+"; transcript_id "A3:chr4H:586189228-586189307:586189228-586189310:+:alternative1";
chr4H	PanBaRT20_trans_aveTPM10.gtf	exon	586189128	586189228	.	+	.	gene_id "A3:chr4H:586189228-586189307:586189228-586189310:+"; transcript_id "A3:chr4H:586189228-586189307:586189228-586189310:+:alternative2";
chr4H	PanBaRT20_trans_aveTPM10.gtf	exon	586189310	586189410	.	+	.	gene_id "A3:chr4H:586189228-586189307:586189228-586189310:+"; transcript_id "A3:chr4H:586189228-586189307:586189228-586189310:+:alternative2";
chr4H	PanBaRT20_trans_aveTPM10.gtf	exon	589765094	589765194	.	+	.	gene_id "A3:chr4H:589765194-589765432:589765194-589765439:+"; transcript_id "A3:chr4H:589765194-589765432:589765194-589765439:+:alternative1";
chr4H	PanBaRT20_trans_aveTPM10.gtf	exon	589765432	589765539	.	+	.	gene_id "A3:chr4H:589765194-589765432:589765194-589765439:+"; transcript_id "A3:chr4H:589765194-589765432:589765194-589765439:+:alternative1";
chr4H	PanBaRT20_trans_aveTPM10.gtf	exon	589765094	589765194	.	+	.	gene_id "A3:chr4H:589765194-589765432:589765194-589765439:+"; transcript_id "A3:chr4H:589765194-589765432:589765194-589765439:+:alternative2";
chr4H	PanBaRT20_trans_aveTPM10.gtf	exon	589765439	589765539	.	+	.	gene_id "A3:chr4H:589765194-589765432:589765194-589765439:+"; transcript_id "A3:chr4H:589765194-589765432:589765194-589765439:+:alternative2";
chr4H	PanBaRT20_trans_aveTPM10.gtf	exon	607074648	607074748	.	+	.	gene_id "A3:chr4H:607074748-607075724:607074748-607075771:+"; transcript_id "A3:chr4H:607074748-607075724:607074748-607075771:+:alternative1";
chr4H	PanBaRT20_trans_aveTPM10.gtf	exon	607075724	607075871	.	+	.	gene_id "A3:chr4H:607074748-607075724:607074748-607075771:+"; transcript_id "A3:chr4H:607074748-607075724:607074748-607075771:+:alternative1";
chr4H	PanBaRT20_trans_aveTPM10.gtf	exon	607074648	607074748	.	+	.	gene_id "A3:chr4H:607074748-607075724:607074748-607075771:+"; transcript_id "A3:chr4H:607074748-607075724:607074748-607075771:+:alternative2";
chr4H	PanBaRT20_trans_aveTPM10.gtf	exon	607075771	607075871	.	+	.	gene_id "A3:chr4H:607074748-607075724:607074748-607075771:+"; transcript_id "A3:chr4H:607074748-607075724:607074748-607075771:+:alternative2";
chr4H	PanBaRT20_trans_aveTPM10.gtf	exon	637455792	637455892	.	+	.	gene_id "A3:chr4H:637455892-637455921:637455892-637455949:+"; transcript_id "A3:chr4H:637455892-637455921:637455892-637455949:+:alternative1";
chr4H	PanBaRT20_trans_aveTPM10.gtf	exon	637455921	637456049	.	+	.	gene_id "A3:chr4H:637455892-637455921:637455892-637455949:+"; transcript_id "A3:chr4H:637455892-637455921:637455892-637455949:+:alternative1";
chr4H	PanBaRT20_trans_aveTPM10.gtf	exon	637455792	637455892	.	+	.	gene_id "A3:chr4H:637455892-637455921:637455892-637455949:+"; transcript_id "A3:chr4H:637455892-637455921:637455892-637455949:+:alternative2";
chr4H	PanBaRT20_trans_aveTPM10.gtf	exon	637455949	637456049	.	+	.	gene_id "A3:chr4H:637455892-637455921:637455892-637455949:+"; transcript_id "A3:chr4H:637455892-637455921:637455892-637455949:+:alternative2";
chr4H	PanBaRT20_trans_aveTPM10.gtf	exon	637455792	637455892	.	+	.	gene_id "A3:chr4H:637455892-637455921:637455892-637455953:+"; transcript_id "A3:chr4H:637455892-637455921:637455892-637455953:+:alternative1";
chr4H	PanBaRT20_trans_aveTPM10.gtf	exon	637455921	637456053	.	+	.	gene_id "A3:chr4H:637455892-637455921:637455892-637455953:+"; transcript_id "A3:chr4H:637455892-637455921:637455892-637455953:+:alternative1";
chr4H	PanBaRT20_trans_aveTPM10.gtf	exon	637455792	637455892	.	+	.	gene_id "A3:chr4H:637455892-637455921:637455892-637455953:+"; transcript_id "A3:chr4H:637455892-637455921:637455892-637455953:+:alternative2";
chr4H	PanBaRT20_trans_aveTPM10.gtf	exon	637455953	637456053	.	+	.	gene_id "A3:chr4H:637455892-637455921:637455892-637455953:+"; transcript_id "A3:chr4H:637455892-637455921:637455892-637455953:+:alternative2";
chr4H	PanBaRT20_trans_aveTPM10.gtf	exon	637455792	637455892	.	+	.	gene_id "A3:chr4H:637455892-637455949:637455892-637455953:+"; transcript_id "A3:chr4H:637455892-637455949:637455892-637455953:+:alternative1";
chr4H	PanBaRT20_trans_aveTPM10.gtf	exon	637455949	637456053	.	+	.	gene_id "A3:chr4H:637455892-637455949:637455892-637455953:+"; transcript_id "A3:chr4H:637455892-637455949:637455892-637455953:+:alternative1";
chr4H	PanBaRT20_trans_aveTPM10.gtf	exon	637455792	637455892	.	+	.	gene_id "A3:chr4H:637455892-637455949:637455892-637455953:+"; transcript_id "A3:chr4H:637455892-637455949:637455892-637455953:+:alternative2";
chr4H	PanBaRT20_trans_aveTPM10.gtf	exon	637455953	637456053	.	+	.	gene_id "A3:chr4H:637455892-637455949:637455892-637455953:+"; transcript_id "A3:chr4H:637455892-637455949:637455892-637455953:+:alternative2";
chr4H	PanBaRT20_trans_aveTPM10.gtf	exon	648831793	648831893	.	+	.	gene_id "A3:chr4H:648831893-648832106:648831893-648832132:+"; transcript_id "A3:chr4H:648831893-648832106:648831893-648832132:+:alternative1";
chr4H	PanBaRT20_trans_aveTPM10.gtf	exon	648832106	648832232	.	+	.	gene_id "A3:chr4H:648831893-648832106:648831893-648832132:+"; transcript_id "A3:chr4H:648831893-648832106:648831893-648832132:+:alternative1";
chr4H	PanBaRT20_trans_aveTPM10.gtf	exon	648831793	648831893	.	+	.	gene_id "A3:chr4H:648831893-648832106:648831893-648832132:+"; transcript_id "A3:chr4H:648831893-648832106:648831893-648832132:+:alternative2";
chr4H	PanBaRT20_trans_aveTPM10.gtf	exon	648832132	648832232	.	+	.	gene_id "A3:chr4H:648831893-648832106:648831893-648832132:+"; transcript_id "A3:chr4H:648831893-648832106:648831893-648832132:+:alternative2";
chr4H	PanBaRT20_trans_aveTPM10.gtf	exon	648834292	648834392	.	+	.	gene_id "A3:chr4H:648834392-648834596:648834392-648834623:+"; transcript_id "A3:chr4H:648834392-648834596:648834392-648834623:+:alternative1";
chr4H	PanBaRT20_trans_aveTPM10.gtf	exon	648834596	648834723	.	+	.	gene_id "A3:chr4H:648834392-648834596:648834392-648834623:+"; transcript_id "A3:chr4H:648834392-648834596:648834392-648834623:+:alternative1";
chr4H	PanBaRT20_trans_aveTPM10.gtf	exon	648834292	648834392	.	+	.	gene_id "A3:chr4H:648834392-648834596:648834392-648834623:+"; transcript_id "A3:chr4H:648834392-648834596:648834392-648834623:+:alternative2";
chr4H	PanBaRT20_trans_aveTPM10.gtf	exon	648834623	648834723	.	+	.	gene_id "A3:chr4H:648834392-648834596:648834392-648834623:+"; transcript_id "A3:chr4H:648834392-648834596:648834392-648834623:+:alternative2";
chr5H	PanBaRT20_trans_aveTPM10.gtf	exon	25104197	25104305	.	-	.	gene_id "A3:chr5H:25104305-25104394:25104297-25104394:-"; transcript_id "A3:chr5H:25104305-25104394:25104297-25104394:-:alternative1";
chr5H	PanBaRT20_trans_aveTPM10.gtf	exon	25104394	25104494	.	-	.	gene_id "A3:chr5H:25104305-25104394:25104297-25104394:-"; transcript_id "A3:chr5H:25104305-25104394:25104297-25104394:-:alternative1";
chr5H	PanBaRT20_trans_aveTPM10.gtf	exon	25104197	25104297	.	-	.	gene_id "A3:chr5H:25104305-25104394:25104297-25104394:-"; transcript_id "A3:chr5H:25104305-25104394:25104297-25104394:-:alternative2";
chr5H	PanBaRT20_trans_aveTPM10.gtf	exon	25104394	25104494	.	-	.	gene_id "A3:chr5H:25104305-25104394:25104297-25104394:-"; transcript_id "A3:chr5H:25104305-25104394:25104297-25104394:-:alternative2";
chr5H	PanBaRT20_trans_aveTPM10.gtf	exon	162876010	162876167	.	-	.	gene_id "A3:chr5H:162876167-162876810:162876110-162876810:-"; transcript_id "A3:chr5H:162876167-162876810:162876110-162876810:-:alternative1";
chr5H	PanBaRT20_trans_aveTPM10.gtf	exon	162876810	162876910	.	-	.	gene_id "A3:chr5H:162876167-162876810:162876110-162876810:-"; transcript_id "A3:chr5H:162876167-162876810:162876110-162876810:-:alternative1";
chr5H	PanBaRT20_trans_aveTPM10.gtf	exon	162876010	162876110	.	-	.	gene_id "A3:chr5H:162876167-162876810:162876110-162876810:-"; transcript_id "A3:chr5H:162876167-162876810:162876110-162876810:-:alternative2";
chr5H	PanBaRT20_trans_aveTPM10.gtf	exon	162876810	162876910	.	-	.	gene_id "A3:chr5H:162876167-162876810:162876110-162876810:-"; transcript_id "A3:chr5H:162876167-162876810:162876110-162876810:-:alternative2";
chr5H	PanBaRT20_trans_aveTPM10.gtf	exon	302990980	302991254	.	-	.	gene_id "A3:chr5H:302991254-302991332:302991080-302991332:-"; transcript_id "A3:chr5H:302991254-302991332:302991080-302991332:-:alternative1";
chr5H	PanBaRT20_trans_aveTPM10.gtf	exon	302991332	302991432	.	-	.	gene_id "A3:chr5H:302991254-302991332:302991080-302991332:-"; transcript_id "A3:chr5H:302991254-302991332:302991080-302991332:-:alternative1";
chr5H	PanBaRT20_trans_aveTPM10.gtf	exon	302990980	302991080	.	-	.	gene_id "A3:chr5H:302991254-302991332:302991080-302991332:-"; transcript_id "A3:chr5H:302991254-302991332:302991080-302991332:-:alternative2";
chr5H	PanBaRT20_trans_aveTPM10.gtf	exon	302991332	302991432	.	-	.	gene_id "A3:chr5H:302991254-302991332:302991080-302991332:-"; transcript_id "A3:chr5H:302991254-302991332:302991080-302991332:-:alternative2";
chr5H	PanBaRT20_trans_aveTPM10.gtf	exon	330430608	330430711	.	-	.	gene_id "A3:chr5H:330430711-330430838:330430708-330430838:-"; transcript_id "A3:chr5H:330430711-330430838:330430708-330430838:-:alternative1";
chr5H	PanBaRT20_trans_aveTPM10.gtf	exon	330430838	330430938	.	-	.	gene_id "A3:chr5H:330430711-330430838:330430708-330430838:-"; transcript_id "A3:chr5H:330430711-330430838:330430708-330430838:-:alternative1";
chr5H	PanBaRT20_trans_aveTPM10.gtf	exon	330430608	330430708	.	-	.	gene_id "A3:chr5H:330430711-330430838:330430708-330430838:-"; transcript_id "A3:chr5H:330430711-330430838:330430708-330430838:-:alternative2";
chr5H	PanBaRT20_trans_aveTPM10.gtf	exon	330430838	330430938	.	-	.	gene_id "A3:chr5H:330430711-330430838:330430708-330430838:-"; transcript_id "A3:chr5H:330430711-330430838:330430708-330430838:-:alternative2";
chr5H	PanBaRT20_trans_aveTPM10.gtf	exon	385001756	385001868	.	-	.	gene_id "A3:chr5H:385001868-385001959:385001856-385001959:-"; transcript_id "A3:chr5H:385001868-385001959:385001856-385001959:-:alternative1";
chr5H	PanBaRT20_trans_aveTPM10.gtf	exon	385001959	385002059	.	-	.	gene_id "A3:chr5H:385001868-385001959:385001856-385001959:-"; transcript_id "A3:chr5H:385001868-385001959:385001856-385001959:-:alternative1";
chr5H	PanBaRT20_trans_aveTPM10.gtf	exon	385001756	385001856	.	-	.	gene_id "A3:chr5H:385001868-385001959:385001856-385001959:-"; transcript_id "A3:chr5H:385001868-385001959:385001856-385001959:-:alternative2";
chr5H	PanBaRT20_trans_aveTPM10.gtf	exon	385001959	385002059	.	-	.	gene_id "A3:chr5H:385001868-385001959:385001856-385001959:-"; transcript_id "A3:chr5H:385001868-385001959:385001856-385001959:-:alternative2";
chr5H	PanBaRT20_trans_aveTPM10.gtf	exon	401612312	401612415	.	-	.	gene_id "A3:chr5H:401612415-401613929:401612412-401613929:-"; transcript_id "A3:chr5H:401612415-401613929:401612412-401613929:-:alternative1";
chr5H	PanBaRT20_trans_aveTPM10.gtf	exon	401613929	401614029	.	-	.	gene_id "A3:chr5H:401612415-401613929:401612412-401613929:-"; transcript_id "A3:chr5H:401612415-401613929:401612412-401613929:-:alternative1";
chr5H	PanBaRT20_trans_aveTPM10.gtf	exon	401612312	401612412	.	-	.	gene_id "A3:chr5H:401612415-401613929:401612412-401613929:-"; transcript_id "A3:chr5H:401612415-401613929:401612412-401613929:-:alternative2";
chr5H	PanBaRT20_trans_aveTPM10.gtf	exon	401613929	401614029	.	-	.	gene_id "A3:chr5H:401612415-401613929:401612412-401613929:-"; transcript_id "A3:chr5H:401612415-401613929:401612412-401613929:-:alternative2";
chr5H	PanBaRT20_trans_aveTPM10.gtf	exon	408272326	408272538	.	-	.	gene_id "A3:chr5H:408272538-408277010:408272426-408277010:-"; transcript_id "A3:chr5H:408272538-408277010:408272426-408277010:-:alternative1";
chr5H	PanBaRT20_trans_aveTPM10.gtf	exon	408277010	408277110	.	-	.	gene_id "A3:chr5H:408272538-408277010:408272426-408277010:-"; transcript_id "A3:chr5H:408272538-408277010:408272426-408277010:-:alternative1";
chr5H	PanBaRT20_trans_aveTPM10.gtf	exon	408272326	408272426	.	-	.	gene_id "A3:chr5H:408272538-408277010:408272426-408277010:-"; transcript_id "A3:chr5H:408272538-408277010:408272426-408277010:-:alternative2";
chr5H	PanBaRT20_trans_aveTPM10.gtf	exon	408277010	408277110	.	-	.	gene_id "A3:chr5H:408272538-408277010:408272426-408277010:-"; transcript_id "A3:chr5H:408272538-408277010:408272426-408277010:-:alternative2";
chr5H	PanBaRT20_trans_aveTPM10.gtf	exon	445273551	445273665	.	-	.	gene_id "A3:chr5H:445273665-445274607:445273651-445274607:-"; transcript_id "A3:chr5H:445273665-445274607:445273651-445274607:-:alternative1";
chr5H	PanBaRT20_trans_aveTPM10.gtf	exon	445274607	445274707	.	-	.	gene_id "A3:chr5H:445273665-445274607:445273651-445274607:-"; transcript_id "A3:chr5H:445273665-445274607:445273651-445274607:-:alternative1";
chr5H	PanBaRT20_trans_aveTPM10.gtf	exon	445273551	445273651	.	-	.	gene_id "A3:chr5H:445273665-445274607:445273651-445274607:-"; transcript_id "A3:chr5H:445273665-445274607:445273651-445274607:-:alternative2";
chr5H	PanBaRT20_trans_aveTPM10.gtf	exon	445274607	445274707	.	-	.	gene_id "A3:chr5H:445273665-445274607:445273651-445274607:-"; transcript_id "A3:chr5H:445273665-445274607:445273651-445274607:-:alternative2";
chr5H	PanBaRT20_trans_aveTPM10.gtf	exon	481529984	481530087	.	-	.	gene_id "A3:chr5H:481530087-481530179:481530084-481530179:-"; transcript_id "A3:chr5H:481530087-481530179:481530084-481530179:-:alternative1";
chr5H	PanBaRT20_trans_aveTPM10.gtf	exon	481530179	481530279	.	-	.	gene_id "A3:chr5H:481530087-481530179:481530084-481530179:-"; transcript_id "A3:chr5H:481530087-481530179:481530084-481530179:-:alternative1";
chr5H	PanBaRT20_trans_aveTPM10.gtf	exon	481529984	481530084	.	-	.	gene_id "A3:chr5H:481530087-481530179:481530084-481530179:-"; transcript_id "A3:chr5H:481530087-481530179:481530084-481530179:-:alternative2";
chr5H	PanBaRT20_trans_aveTPM10.gtf	exon	481530179	481530279	.	-	.	gene_id "A3:chr5H:481530087-481530179:481530084-481530179:-"; transcript_id "A3:chr5H:481530087-481530179:481530084-481530179:-:alternative2";
chr5H	PanBaRT20_trans_aveTPM10.gtf	exon	481530181	481530285	.	-	.	gene_id "A3:chr5H:481530285-481531416:481530281-481531416:-"; transcript_id "A3:chr5H:481530285-481531416:481530281-481531416:-:alternative1";
chr5H	PanBaRT20_trans_aveTPM10.gtf	exon	481531416	481531516	.	-	.	gene_id "A3:chr5H:481530285-481531416:481530281-481531416:-"; transcript_id "A3:chr5H:481530285-481531416:481530281-481531416:-:alternative1";
chr5H	PanBaRT20_trans_aveTPM10.gtf	exon	481530181	481530281	.	-	.	gene_id "A3:chr5H:481530285-481531416:481530281-481531416:-"; transcript_id "A3:chr5H:481530285-481531416:481530281-481531416:-:alternative2";
chr5H	PanBaRT20_trans_aveTPM10.gtf	exon	481531416	481531516	.	-	.	gene_id "A3:chr5H:481530285-481531416:481530281-481531416:-"; transcript_id "A3:chr5H:481530285-481531416:481530281-481531416:-:alternative2";
chr5H	PanBaRT20_trans_aveTPM10.gtf	exon	525557058	525557163	.	-	.	gene_id "A3:chr5H:525557163-525557365:525557158-525557365:-"; transcript_id "A3:chr5H:525557163-525557365:525557158-525557365:-:alternative1";
chr5H	PanBaRT20_trans_aveTPM10.gtf	exon	525557365	525557465	.	-	.	gene_id "A3:chr5H:525557163-525557365:525557158-525557365:-"; transcript_id "A3:chr5H:525557163-525557365:525557158-525557365:-:alternative1";
chr5H	PanBaRT20_trans_aveTPM10.gtf	exon	525557058	525557158	.	-	.	gene_id "A3:chr5H:525557163-525557365:525557158-525557365:-"; transcript_id "A3:chr5H:525557163-525557365:525557158-525557365:-:alternative2";
chr5H	PanBaRT20_trans_aveTPM10.gtf	exon	525557365	525557465	.	-	.	gene_id "A3:chr5H:525557163-525557365:525557158-525557365:-"; transcript_id "A3:chr5H:525557163-525557365:525557158-525557365:-:alternative2";
chr5H	PanBaRT20_trans_aveTPM10.gtf	exon	540511936	540512060	.	-	.	gene_id "A3:chr5H:540512060-540512155:540512036-540512155:-"; transcript_id "A3:chr5H:540512060-540512155:540512036-540512155:-:alternative1";
chr5H	PanBaRT20_trans_aveTPM10.gtf	exon	540512155	540512255	.	-	.	gene_id "A3:chr5H:540512060-540512155:540512036-540512155:-"; transcript_id "A3:chr5H:540512060-540512155:540512036-540512155:-:alternative1";
chr5H	PanBaRT20_trans_aveTPM10.gtf	exon	540511936	540512036	.	-	.	gene_id "A3:chr5H:540512060-540512155:540512036-540512155:-"; transcript_id "A3:chr5H:540512060-540512155:540512036-540512155:-:alternative2";
chr5H	PanBaRT20_trans_aveTPM10.gtf	exon	540512155	540512255	.	-	.	gene_id "A3:chr5H:540512060-540512155:540512036-540512155:-"; transcript_id "A3:chr5H:540512060-540512155:540512036-540512155:-:alternative2";
chr5H	PanBaRT20_trans_aveTPM10.gtf	exon	547985951	547986072	.	-	.	gene_id "A3:chr5H:547986072-547987641:547986051-547987641:-"; transcript_id "A3:chr5H:547986072-547987641:547986051-547987641:-:alternative1";
chr5H	PanBaRT20_trans_aveTPM10.gtf	exon	547987641	547987741	.	-	.	gene_id "A3:chr5H:547986072-547987641:547986051-547987641:-"; transcript_id "A3:chr5H:547986072-547987641:547986051-547987641:-:alternative1";
chr5H	PanBaRT20_trans_aveTPM10.gtf	exon	547985951	547986051	.	-	.	gene_id "A3:chr5H:547986072-547987641:547986051-547987641:-"; transcript_id "A3:chr5H:547986072-547987641:547986051-547987641:-:alternative2";
chr5H	PanBaRT20_trans_aveTPM10.gtf	exon	547987641	547987741	.	-	.	gene_id "A3:chr5H:547986072-547987641:547986051-547987641:-"; transcript_id "A3:chr5H:547986072-547987641:547986051-547987641:-:alternative2";
chr5H	PanBaRT20_trans_aveTPM10.gtf	exon	549590773	549590876	.	-	.	gene_id "A3:chr5H:549590876-549590971:549590873-549590971:-"; transcript_id "A3:chr5H:549590876-549590971:549590873-549590971:-:alternative1";
chr5H	PanBaRT20_trans_aveTPM10.gtf	exon	549590971	549591071	.	-	.	gene_id "A3:chr5H:549590876-549590971:549590873-549590971:-"; transcript_id "A3:chr5H:549590876-549590971:549590873-549590971:-:alternative1";
chr5H	PanBaRT20_trans_aveTPM10.gtf	exon	549590773	549590873	.	-	.	gene_id "A3:chr5H:549590876-549590971:549590873-549590971:-"; transcript_id "A3:chr5H:549590876-549590971:549590873-549590971:-:alternative2";
chr5H	PanBaRT20_trans_aveTPM10.gtf	exon	549590971	549591071	.	-	.	gene_id "A3:chr5H:549590876-549590971:549590873-549590971:-"; transcript_id "A3:chr5H:549590876-549590971:549590873-549590971:-:alternative2";
chr5H	PanBaRT20_trans_aveTPM10.gtf	exon	557061476	557061579	.	-	.	gene_id "A3:chr5H:557061579-557061669:557061576-557061669:-"; transcript_id "A3:chr5H:557061579-557061669:557061576-557061669:-:alternative1";
chr5H	PanBaRT20_trans_aveTPM10.gtf	exon	557061669	557061769	.	-	.	gene_id "A3:chr5H:557061579-557061669:557061576-557061669:-"; transcript_id "A3:chr5H:557061579-557061669:557061576-557061669:-:alternative1";
chr5H	PanBaRT20_trans_aveTPM10.gtf	exon	557061476	557061576	.	-	.	gene_id "A3:chr5H:557061579-557061669:557061576-557061669:-"; transcript_id "A3:chr5H:557061579-557061669:557061576-557061669:-:alternative2";
chr5H	PanBaRT20_trans_aveTPM10.gtf	exon	557061669	557061769	.	-	.	gene_id "A3:chr5H:557061579-557061669:557061576-557061669:-"; transcript_id "A3:chr5H:557061579-557061669:557061576-557061669:-:alternative2";
chr5H	PanBaRT20_trans_aveTPM10.gtf	exon	566790905	566791032	.	-	.	gene_id "A3:chr5H:566791032-566791116:566791005-566791116:-"; transcript_id "A3:chr5H:566791032-566791116:566791005-566791116:-:alternative1";
chr5H	PanBaRT20_trans_aveTPM10.gtf	exon	566791116	566791216	.	-	.	gene_id "A3:chr5H:566791032-566791116:566791005-566791116:-"; transcript_id "A3:chr5H:566791032-566791116:566791005-566791116:-:alternative1";
chr5H	PanBaRT20_trans_aveTPM10.gtf	exon	566790905	566791005	.	-	.	gene_id "A3:chr5H:566791032-566791116:566791005-566791116:-"; transcript_id "A3:chr5H:566791032-566791116:566791005-566791116:-:alternative2";
chr5H	PanBaRT20_trans_aveTPM10.gtf	exon	566791116	566791216	.	-	.	gene_id "A3:chr5H:566791032-566791116:566791005-566791116:-"; transcript_id "A3:chr5H:566791032-566791116:566791005-566791116:-:alternative2";
chr5H	PanBaRT20_trans_aveTPM10.gtf	exon	589152998	589153438	.	-	.	gene_id "A3:chr5H:589153438-589154143:589153098-589154143:-"; transcript_id "A3:chr5H:589153438-589154143:589153098-589154143:-:alternative1";
chr5H	PanBaRT20_trans_aveTPM10.gtf	exon	589154143	589154243	.	-	.	gene_id "A3:chr5H:589153438-589154143:589153098-589154143:-"; transcript_id "A3:chr5H:589153438-589154143:589153098-589154143:-:alternative1";
chr5H	PanBaRT20_trans_aveTPM10.gtf	exon	589152998	589153098	.	-	.	gene_id "A3:chr5H:589153438-589154143:589153098-589154143:-"; transcript_id "A3:chr5H:589153438-589154143:589153098-589154143:-:alternative2";
chr5H	PanBaRT20_trans_aveTPM10.gtf	exon	589154143	589154243	.	-	.	gene_id "A3:chr5H:589153438-589154143:589153098-589154143:-"; transcript_id "A3:chr5H:589153438-589154143:589153098-589154143:-:alternative2";
chr5H	PanBaRT20_trans_aveTPM10.gtf	exon	124887872	124887972	.	+	.	gene_id "A3:chr5H:124887972-124888056:124887972-124888061:+"; transcript_id "A3:chr5H:124887972-124888056:124887972-124888061:+:alternative1";
chr5H	PanBaRT20_trans_aveTPM10.gtf	exon	124888056	124888161	.	+	.	gene_id "A3:chr5H:124887972-124888056:124887972-124888061:+"; transcript_id "A3:chr5H:124887972-124888056:124887972-124888061:+:alternative1";
chr5H	PanBaRT20_trans_aveTPM10.gtf	exon	124887872	124887972	.	+	.	gene_id "A3:chr5H:124887972-124888056:124887972-124888061:+"; transcript_id "A3:chr5H:124887972-124888056:124887972-124888061:+:alternative2";
chr5H	PanBaRT20_trans_aveTPM10.gtf	exon	124888061	124888161	.	+	.	gene_id "A3:chr5H:124887972-124888056:124887972-124888061:+"; transcript_id "A3:chr5H:124887972-124888056:124887972-124888061:+:alternative2";
chr5H	PanBaRT20_trans_aveTPM10.gtf	exon	215810575	215810675	.	+	.	gene_id "A3:chr5H:215810675-215810764:215810675-215810785:+"; transcript_id "A3:chr5H:215810675-215810764:215810675-215810785:+:alternative1";
chr5H	PanBaRT20_trans_aveTPM10.gtf	exon	215810764	215810885	.	+	.	gene_id "A3:chr5H:215810675-215810764:215810675-215810785:+"; transcript_id "A3:chr5H:215810675-215810764:215810675-215810785:+:alternative1";
chr5H	PanBaRT20_trans_aveTPM10.gtf	exon	215810575	215810675	.	+	.	gene_id "A3:chr5H:215810675-215810764:215810675-215810785:+"; transcript_id "A3:chr5H:215810675-215810764:215810675-215810785:+:alternative2";
chr5H	PanBaRT20_trans_aveTPM10.gtf	exon	215810785	215810885	.	+	.	gene_id "A3:chr5H:215810675-215810764:215810675-215810785:+"; transcript_id "A3:chr5H:215810675-215810764:215810675-215810785:+:alternative2";
chr5H	PanBaRT20_trans_aveTPM10.gtf	exon	237126667	237126767	.	+	.	gene_id "A3:chr5H:237126767-237126864:237126767-237126881:+"; transcript_id "A3:chr5H:237126767-237126864:237126767-237126881:+:alternative1";
chr5H	PanBaRT20_trans_aveTPM10.gtf	exon	237126864	237126981	.	+	.	gene_id "A3:chr5H:237126767-237126864:237126767-237126881:+"; transcript_id "A3:chr5H:237126767-237126864:237126767-237126881:+:alternative1";
chr5H	PanBaRT20_trans_aveTPM10.gtf	exon	237126667	237126767	.	+	.	gene_id "A3:chr5H:237126767-237126864:237126767-237126881:+"; transcript_id "A3:chr5H:237126767-237126864:237126767-237126881:+:alternative2";
chr5H	PanBaRT20_trans_aveTPM10.gtf	exon	237126881	237126981	.	+	.	gene_id "A3:chr5H:237126767-237126864:237126767-237126881:+"; transcript_id "A3:chr5H:237126767-237126864:237126767-237126881:+:alternative2";
chr5H	PanBaRT20_trans_aveTPM10.gtf	exon	309527267	309527367	.	+	.	gene_id "A3:chr5H:309527367-309527452:309527367-309527479:+"; transcript_id "A3:chr5H:309527367-309527452:309527367-309527479:+:alternative1";
chr5H	PanBaRT20_trans_aveTPM10.gtf	exon	309527452	309527579	.	+	.	gene_id "A3:chr5H:309527367-309527452:309527367-309527479:+"; transcript_id "A3:chr5H:309527367-309527452:309527367-309527479:+:alternative1";
chr5H	PanBaRT20_trans_aveTPM10.gtf	exon	309527267	309527367	.	+	.	gene_id "A3:chr5H:309527367-309527452:309527367-309527479:+"; transcript_id "A3:chr5H:309527367-309527452:309527367-309527479:+:alternative2";
chr5H	PanBaRT20_trans_aveTPM10.gtf	exon	309527479	309527579	.	+	.	gene_id "A3:chr5H:309527367-309527452:309527367-309527479:+"; transcript_id "A3:chr5H:309527367-309527452:309527367-309527479:+:alternative2";
chr5H	PanBaRT20_trans_aveTPM10.gtf	exon	333366246	333366346	.	+	.	gene_id "A3:chr5H:333366346-333366571:333366346-333366583:+"; transcript_id "A3:chr5H:333366346-333366571:333366346-333366583:+:alternative1";
chr5H	PanBaRT20_trans_aveTPM10.gtf	exon	333366571	333366683	.	+	.	gene_id "A3:chr5H:333366346-333366571:333366346-333366583:+"; transcript_id "A3:chr5H:333366346-333366571:333366346-333366583:+:alternative1";
chr5H	PanBaRT20_trans_aveTPM10.gtf	exon	333366246	333366346	.	+	.	gene_id "A3:chr5H:333366346-333366571:333366346-333366583:+"; transcript_id "A3:chr5H:333366346-333366571:333366346-333366583:+:alternative2";
chr5H	PanBaRT20_trans_aveTPM10.gtf	exon	333366583	333366683	.	+	.	gene_id "A3:chr5H:333366346-333366571:333366346-333366583:+"; transcript_id "A3:chr5H:333366346-333366571:333366346-333366583:+:alternative2";
chr5H	PanBaRT20_trans_aveTPM10.gtf	exon	392024379	392024479	.	+	.	gene_id "A3:chr5H:392024479-392024976:392024479-392025015:+"; transcript_id "A3:chr5H:392024479-392024976:392024479-392025015:+:alternative1";
chr5H	PanBaRT20_trans_aveTPM10.gtf	exon	392024976	392025115	.	+	.	gene_id "A3:chr5H:392024479-392024976:392024479-392025015:+"; transcript_id "A3:chr5H:392024479-392024976:392024479-392025015:+:alternative1";
chr5H	PanBaRT20_trans_aveTPM10.gtf	exon	392024379	392024479	.	+	.	gene_id "A3:chr5H:392024479-392024976:392024479-392025015:+"; transcript_id "A3:chr5H:392024479-392024976:392024479-392025015:+:alternative2";
chr5H	PanBaRT20_trans_aveTPM10.gtf	exon	392025015	392025115	.	+	.	gene_id "A3:chr5H:392024479-392024976:392024479-392025015:+"; transcript_id "A3:chr5H:392024479-392024976:392024479-392025015:+:alternative2";
chr5H	PanBaRT20_trans_aveTPM10.gtf	exon	421037995	421038095	.	+	.	gene_id "A3:chr5H:421038095-421039008:421038095-421039012:+"; transcript_id "A3:chr5H:421038095-421039008:421038095-421039012:+:alternative1";
chr5H	PanBaRT20_trans_aveTPM10.gtf	exon	421039008	421039112	.	+	.	gene_id "A3:chr5H:421038095-421039008:421038095-421039012:+"; transcript_id "A3:chr5H:421038095-421039008:421038095-421039012:+:alternative1";
chr5H	PanBaRT20_trans_aveTPM10.gtf	exon	421037995	421038095	.	+	.	gene_id "A3:chr5H:421038095-421039008:421038095-421039012:+"; transcript_id "A3:chr5H:421038095-421039008:421038095-421039012:+:alternative2";
chr5H	PanBaRT20_trans_aveTPM10.gtf	exon	421039012	421039112	.	+	.	gene_id "A3:chr5H:421038095-421039008:421038095-421039012:+"; transcript_id "A3:chr5H:421038095-421039008:421038095-421039012:+:alternative2";
chr5H	PanBaRT20_trans_aveTPM10.gtf	exon	453761793	453761893	.	+	.	gene_id "A3:chr5H:453761893-453762422:453761893-453762425:+"; transcript_id "A3:chr5H:453761893-453762422:453761893-453762425:+:alternative1";
chr5H	PanBaRT20_trans_aveTPM10.gtf	exon	453762422	453762525	.	+	.	gene_id "A3:chr5H:453761893-453762422:453761893-453762425:+"; transcript_id "A3:chr5H:453761893-453762422:453761893-453762425:+:alternative1";
chr5H	PanBaRT20_trans_aveTPM10.gtf	exon	453761793	453761893	.	+	.	gene_id "A3:chr5H:453761893-453762422:453761893-453762425:+"; transcript_id "A3:chr5H:453761893-453762422:453761893-453762425:+:alternative2";
chr5H	PanBaRT20_trans_aveTPM10.gtf	exon	453762425	453762525	.	+	.	gene_id "A3:chr5H:453761893-453762422:453761893-453762425:+"; transcript_id "A3:chr5H:453761893-453762422:453761893-453762425:+:alternative2";
chr5H	PanBaRT20_trans_aveTPM10.gtf	exon	453761793	453761893	.	+	.	gene_id "A3:chr5H:453761893-453762422:453761893-453762437:+"; transcript_id "A3:chr5H:453761893-453762422:453761893-453762437:+:alternative1";
chr5H	PanBaRT20_trans_aveTPM10.gtf	exon	453762422	453762537	.	+	.	gene_id "A3:chr5H:453761893-453762422:453761893-453762437:+"; transcript_id "A3:chr5H:453761893-453762422:453761893-453762437:+:alternative1";
chr5H	PanBaRT20_trans_aveTPM10.gtf	exon	453761793	453761893	.	+	.	gene_id "A3:chr5H:453761893-453762422:453761893-453762437:+"; transcript_id "A3:chr5H:453761893-453762422:453761893-453762437:+:alternative2";
chr5H	PanBaRT20_trans_aveTPM10.gtf	exon	453762437	453762537	.	+	.	gene_id "A3:chr5H:453761893-453762422:453761893-453762437:+"; transcript_id "A3:chr5H:453761893-453762422:453761893-453762437:+:alternative2";
chr5H	PanBaRT20_trans_aveTPM10.gtf	exon	453761793	453761893	.	+	.	gene_id "A3:chr5H:453761893-453762425:453761893-453762437:+"; transcript_id "A3:chr5H:453761893-453762425:453761893-453762437:+:alternative1";
chr5H	PanBaRT20_trans_aveTPM10.gtf	exon	453762425	453762537	.	+	.	gene_id "A3:chr5H:453761893-453762425:453761893-453762437:+"; transcript_id "A3:chr5H:453761893-453762425:453761893-453762437:+:alternative1";
chr5H	PanBaRT20_trans_aveTPM10.gtf	exon	453761793	453761893	.	+	.	gene_id "A3:chr5H:453761893-453762425:453761893-453762437:+"; transcript_id "A3:chr5H:453761893-453762425:453761893-453762437:+:alternative2";
chr5H	PanBaRT20_trans_aveTPM10.gtf	exon	453762437	453762537	.	+	.	gene_id "A3:chr5H:453761893-453762425:453761893-453762437:+"; transcript_id "A3:chr5H:453761893-453762425:453761893-453762437:+:alternative2";
chr5H	PanBaRT20_trans_aveTPM10.gtf	exon	516994650	516994750	.	+	.	gene_id "A3:chr5H:516994750-516994920:516994750-516995191:+"; transcript_id "A3:chr5H:516994750-516994920:516994750-516995191:+:alternative1";
chr5H	PanBaRT20_trans_aveTPM10.gtf	exon	516994920	516995291	.	+	.	gene_id "A3:chr5H:516994750-516994920:516994750-516995191:+"; transcript_id "A3:chr5H:516994750-516994920:516994750-516995191:+:alternative1";
chr5H	PanBaRT20_trans_aveTPM10.gtf	exon	516994650	516994750	.	+	.	gene_id "A3:chr5H:516994750-516994920:516994750-516995191:+"; transcript_id "A3:chr5H:516994750-516994920:516994750-516995191:+:alternative2";
chr5H	PanBaRT20_trans_aveTPM10.gtf	exon	516995191	516995291	.	+	.	gene_id "A3:chr5H:516994750-516994920:516994750-516995191:+"; transcript_id "A3:chr5H:516994750-516994920:516994750-516995191:+:alternative2";
chr5H	PanBaRT20_trans_aveTPM10.gtf	exon	524331819	524331919	.	+	.	gene_id "A3:chr5H:524331919-524332003:524331919-524332006:+"; transcript_id "A3:chr5H:524331919-524332003:524331919-524332006:+:alternative1";
chr5H	PanBaRT20_trans_aveTPM10.gtf	exon	524332003	524332106	.	+	.	gene_id "A3:chr5H:524331919-524332003:524331919-524332006:+"; transcript_id "A3:chr5H:524331919-524332003:524331919-524332006:+:alternative1";
chr5H	PanBaRT20_trans_aveTPM10.gtf	exon	524331819	524331919	.	+	.	gene_id "A3:chr5H:524331919-524332003:524331919-524332006:+"; transcript_id "A3:chr5H:524331919-524332003:524331919-524332006:+:alternative2";
chr5H	PanBaRT20_trans_aveTPM10.gtf	exon	524332006	524332106	.	+	.	gene_id "A3:chr5H:524331919-524332003:524331919-524332006:+"; transcript_id "A3:chr5H:524331919-524332003:524331919-524332006:+:alternative2";
chr5H	PanBaRT20_trans_aveTPM10.gtf	exon	527505997	527506097	.	+	.	gene_id "A3:chr5H:527506097-527507020:527506097-527507029:+"; transcript_id "A3:chr5H:527506097-527507020:527506097-527507029:+:alternative1";
chr5H	PanBaRT20_trans_aveTPM10.gtf	exon	527507020	527507129	.	+	.	gene_id "A3:chr5H:527506097-527507020:527506097-527507029:+"; transcript_id "A3:chr5H:527506097-527507020:527506097-527507029:+:alternative1";
chr5H	PanBaRT20_trans_aveTPM10.gtf	exon	527505997	527506097	.	+	.	gene_id "A3:chr5H:527506097-527507020:527506097-527507029:+"; transcript_id "A3:chr5H:527506097-527507020:527506097-527507029:+:alternative2";
chr5H	PanBaRT20_trans_aveTPM10.gtf	exon	527507029	527507129	.	+	.	gene_id "A3:chr5H:527506097-527507020:527506097-527507029:+"; transcript_id "A3:chr5H:527506097-527507020:527506097-527507029:+:alternative2";
chr5H	PanBaRT20_trans_aveTPM10.gtf	exon	551048649	551048749	.	+	.	gene_id "A3:chr5H:551048749-551048853:551048749-551048893:+"; transcript_id "A3:chr5H:551048749-551048853:551048749-551048893:+:alternative1";
chr5H	PanBaRT20_trans_aveTPM10.gtf	exon	551048853	551048993	.	+	.	gene_id "A3:chr5H:551048749-551048853:551048749-551048893:+"; transcript_id "A3:chr5H:551048749-551048853:551048749-551048893:+:alternative1";
chr5H	PanBaRT20_trans_aveTPM10.gtf	exon	551048649	551048749	.	+	.	gene_id "A3:chr5H:551048749-551048853:551048749-551048893:+"; transcript_id "A3:chr5H:551048749-551048853:551048749-551048893:+:alternative2";
chr5H	PanBaRT20_trans_aveTPM10.gtf	exon	551048893	551048993	.	+	.	gene_id "A3:chr5H:551048749-551048853:551048749-551048893:+"; transcript_id "A3:chr5H:551048749-551048853:551048749-551048893:+:alternative2";
chr5H	PanBaRT20_trans_aveTPM10.gtf	exon	586513666	586513766	.	+	.	gene_id "A3:chr5H:586513766-586513875:586513766-586513893:+"; transcript_id "A3:chr5H:586513766-586513875:586513766-586513893:+:alternative1";
chr5H	PanBaRT20_trans_aveTPM10.gtf	exon	586513875	586513993	.	+	.	gene_id "A3:chr5H:586513766-586513875:586513766-586513893:+"; transcript_id "A3:chr5H:586513766-586513875:586513766-586513893:+:alternative1";
chr5H	PanBaRT20_trans_aveTPM10.gtf	exon	586513666	586513766	.	+	.	gene_id "A3:chr5H:586513766-586513875:586513766-586513893:+"; transcript_id "A3:chr5H:586513766-586513875:586513766-586513893:+:alternative2";
chr5H	PanBaRT20_trans_aveTPM10.gtf	exon	586513893	586513993	.	+	.	gene_id "A3:chr5H:586513766-586513875:586513766-586513893:+"; transcript_id "A3:chr5H:586513766-586513875:586513766-586513893:+:alternative2";
chr5H	PanBaRT20_trans_aveTPM10.gtf	exon	597180096	597180196	.	+	.	gene_id "A3:chr5H:597180196-597180842:597180196-597180850:+"; transcript_id "A3:chr5H:597180196-597180842:597180196-597180850:+:alternative1";
chr5H	PanBaRT20_trans_aveTPM10.gtf	exon	597180842	597180950	.	+	.	gene_id "A3:chr5H:597180196-597180842:597180196-597180850:+"; transcript_id "A3:chr5H:597180196-597180842:597180196-597180850:+:alternative1";
chr5H	PanBaRT20_trans_aveTPM10.gtf	exon	597180096	597180196	.	+	.	gene_id "A3:chr5H:597180196-597180842:597180196-597180850:+"; transcript_id "A3:chr5H:597180196-597180842:597180196-597180850:+:alternative2";
chr5H	PanBaRT20_trans_aveTPM10.gtf	exon	597180850	597180950	.	+	.	gene_id "A3:chr5H:597180196-597180842:597180196-597180850:+"; transcript_id "A3:chr5H:597180196-597180842:597180196-597180850:+:alternative2";
chr5H	PanBaRT20_trans_aveTPM10.gtf	exon	610706287	610706387	.	+	.	gene_id "A3:chr5H:610706387-610706421:610706387-610706732:+"; transcript_id "A3:chr5H:610706387-610706421:610706387-610706732:+:alternative1";
chr5H	PanBaRT20_trans_aveTPM10.gtf	exon	610706421	610706832	.	+	.	gene_id "A3:chr5H:610706387-610706421:610706387-610706732:+"; transcript_id "A3:chr5H:610706387-610706421:610706387-610706732:+:alternative1";
chr5H	PanBaRT20_trans_aveTPM10.gtf	exon	610706287	610706387	.	+	.	gene_id "A3:chr5H:610706387-610706421:610706387-610706732:+"; transcript_id "A3:chr5H:610706387-610706421:610706387-610706732:+:alternative2";
chr5H	PanBaRT20_trans_aveTPM10.gtf	exon	610706732	610706832	.	+	.	gene_id "A3:chr5H:610706387-610706421:610706387-610706732:+"; transcript_id "A3:chr5H:610706387-610706421:610706387-610706732:+:alternative2";
chr5H	PanBaRT20_trans_aveTPM10.gtf	exon	613069600	613069700	.	+	.	gene_id "A3:chr5H:613069700-613069835:613069700-613069842:+"; transcript_id "A3:chr5H:613069700-613069835:613069700-613069842:+:alternative1";
chr5H	PanBaRT20_trans_aveTPM10.gtf	exon	613069835	613069942	.	+	.	gene_id "A3:chr5H:613069700-613069835:613069700-613069842:+"; transcript_id "A3:chr5H:613069700-613069835:613069700-613069842:+:alternative1";
chr5H	PanBaRT20_trans_aveTPM10.gtf	exon	613069600	613069700	.	+	.	gene_id "A3:chr5H:613069700-613069835:613069700-613069842:+"; transcript_id "A3:chr5H:613069700-613069835:613069700-613069842:+:alternative2";
chr5H	PanBaRT20_trans_aveTPM10.gtf	exon	613069842	613069942	.	+	.	gene_id "A3:chr5H:613069700-613069835:613069700-613069842:+"; transcript_id "A3:chr5H:613069700-613069835:613069700-613069842:+:alternative2";
chr5H	PanBaRT20_trans_aveTPM10.gtf	exon	614696590	614696690	.	+	.	gene_id "A3:chr5H:614696690-614696793:614696690-614696797:+"; transcript_id "A3:chr5H:614696690-614696793:614696690-614696797:+:alternative1";
chr5H	PanBaRT20_trans_aveTPM10.gtf	exon	614696793	614696897	.	+	.	gene_id "A3:chr5H:614696690-614696793:614696690-614696797:+"; transcript_id "A3:chr5H:614696690-614696793:614696690-614696797:+:alternative1";
chr5H	PanBaRT20_trans_aveTPM10.gtf	exon	614696590	614696690	.	+	.	gene_id "A3:chr5H:614696690-614696793:614696690-614696797:+"; transcript_id "A3:chr5H:614696690-614696793:614696690-614696797:+:alternative2";
chr5H	PanBaRT20_trans_aveTPM10.gtf	exon	614696797	614696897	.	+	.	gene_id "A3:chr5H:614696690-614696793:614696690-614696797:+"; transcript_id "A3:chr5H:614696690-614696793:614696690-614696797:+:alternative2";
chr5H	PanBaRT20_trans_aveTPM10.gtf	exon	621985893	621985993	.	+	.	gene_id "A3:chr5H:621985993-621986101:621985993-621986107:+"; transcript_id "A3:chr5H:621985993-621986101:621985993-621986107:+:alternative1";
chr5H	PanBaRT20_trans_aveTPM10.gtf	exon	621986101	621986207	.	+	.	gene_id "A3:chr5H:621985993-621986101:621985993-621986107:+"; transcript_id "A3:chr5H:621985993-621986101:621985993-621986107:+:alternative1";
chr5H	PanBaRT20_trans_aveTPM10.gtf	exon	621985893	621985993	.	+	.	gene_id "A3:chr5H:621985993-621986101:621985993-621986107:+"; transcript_id "A3:chr5H:621985993-621986101:621985993-621986107:+:alternative2";
chr5H	PanBaRT20_trans_aveTPM10.gtf	exon	621986107	621986207	.	+	.	gene_id "A3:chr5H:621985993-621986101:621985993-621986107:+"; transcript_id "A3:chr5H:621985993-621986101:621985993-621986107:+:alternative2";
chr5H	PanBaRT20_trans_aveTPM10.gtf	exon	641270833	641270933	.	+	.	gene_id "A3:chr5H:641270933-641271734:641270933-641271959:+"; transcript_id "A3:chr5H:641270933-641271734:641270933-641271959:+:alternative1";
chr5H	PanBaRT20_trans_aveTPM10.gtf	exon	641271734	641272059	.	+	.	gene_id "A3:chr5H:641270933-641271734:641270933-641271959:+"; transcript_id "A3:chr5H:641270933-641271734:641270933-641271959:+:alternative1";
chr5H	PanBaRT20_trans_aveTPM10.gtf	exon	641270833	641270933	.	+	.	gene_id "A3:chr5H:641270933-641271734:641270933-641271959:+"; transcript_id "A3:chr5H:641270933-641271734:641270933-641271959:+:alternative2";
chr5H	PanBaRT20_trans_aveTPM10.gtf	exon	641271959	641272059	.	+	.	gene_id "A3:chr5H:641270933-641271734:641270933-641271959:+"; transcript_id "A3:chr5H:641270933-641271734:641270933-641271959:+:alternative2";
chr6H	PanBaRT20_trans_aveTPM10.gtf	exon	464010	464150	.	-	.	gene_id "A3:chr6H:464150-464250:464110-464250:-"; transcript_id "A3:chr6H:464150-464250:464110-464250:-:alternative1";
chr6H	PanBaRT20_trans_aveTPM10.gtf	exon	464250	464350	.	-	.	gene_id "A3:chr6H:464150-464250:464110-464250:-"; transcript_id "A3:chr6H:464150-464250:464110-464250:-:alternative1";
chr6H	PanBaRT20_trans_aveTPM10.gtf	exon	464010	464110	.	-	.	gene_id "A3:chr6H:464150-464250:464110-464250:-"; transcript_id "A3:chr6H:464150-464250:464110-464250:-:alternative2";
chr6H	PanBaRT20_trans_aveTPM10.gtf	exon	464250	464350	.	-	.	gene_id "A3:chr6H:464150-464250:464110-464250:-"; transcript_id "A3:chr6H:464150-464250:464110-464250:-:alternative2";
chr6H	PanBaRT20_trans_aveTPM10.gtf	exon	1116668	1116808	.	-	.	gene_id "A3:chr6H:1116808-1116908:1116768-1116908:-"; transcript_id "A3:chr6H:1116808-1116908:1116768-1116908:-:alternative1";
chr6H	PanBaRT20_trans_aveTPM10.gtf	exon	1116908	1117008	.	-	.	gene_id "A3:chr6H:1116808-1116908:1116768-1116908:-"; transcript_id "A3:chr6H:1116808-1116908:1116768-1116908:-:alternative1";
chr6H	PanBaRT20_trans_aveTPM10.gtf	exon	1116668	1116768	.	-	.	gene_id "A3:chr6H:1116808-1116908:1116768-1116908:-"; transcript_id "A3:chr6H:1116808-1116908:1116768-1116908:-:alternative2";
chr6H	PanBaRT20_trans_aveTPM10.gtf	exon	1116908	1117008	.	-	.	gene_id "A3:chr6H:1116808-1116908:1116768-1116908:-"; transcript_id "A3:chr6H:1116808-1116908:1116768-1116908:-:alternative2";
chr6H	PanBaRT20_trans_aveTPM10.gtf	exon	1116548	1116661	.	-	.	gene_id "A3:chr6H:1116661-1116740:1116648-1116740:-"; transcript_id "A3:chr6H:1116661-1116740:1116648-1116740:-:alternative1";
chr6H	PanBaRT20_trans_aveTPM10.gtf	exon	1116740	1116840	.	-	.	gene_id "A3:chr6H:1116661-1116740:1116648-1116740:-"; transcript_id "A3:chr6H:1116661-1116740:1116648-1116740:-:alternative1";
chr6H	PanBaRT20_trans_aveTPM10.gtf	exon	1116548	1116648	.	-	.	gene_id "A3:chr6H:1116661-1116740:1116648-1116740:-"; transcript_id "A3:chr6H:1116661-1116740:1116648-1116740:-:alternative2";
chr6H	PanBaRT20_trans_aveTPM10.gtf	exon	1116740	1116840	.	-	.	gene_id "A3:chr6H:1116661-1116740:1116648-1116740:-"; transcript_id "A3:chr6H:1116661-1116740:1116648-1116740:-:alternative2";
chr6H	PanBaRT20_trans_aveTPM10.gtf	exon	6384578	6384682	.	-	.	gene_id "A3:chr6H:6384682-6385407:6384678-6385407:-"; transcript_id "A3:chr6H:6384682-6385407:6384678-6385407:-:alternative1";
chr6H	PanBaRT20_trans_aveTPM10.gtf	exon	6385407	6385507	.	-	.	gene_id "A3:chr6H:6384682-6385407:6384678-6385407:-"; transcript_id "A3:chr6H:6384682-6385407:6384678-6385407:-:alternative1";
chr6H	PanBaRT20_trans_aveTPM10.gtf	exon	6384578	6384678	.	-	.	gene_id "A3:chr6H:6384682-6385407:6384678-6385407:-"; transcript_id "A3:chr6H:6384682-6385407:6384678-6385407:-:alternative2";
chr6H	PanBaRT20_trans_aveTPM10.gtf	exon	6385407	6385507	.	-	.	gene_id "A3:chr6H:6384682-6385407:6384678-6385407:-"; transcript_id "A3:chr6H:6384682-6385407:6384678-6385407:-:alternative2";
chr6H	PanBaRT20_trans_aveTPM10.gtf	exon	45626619	45626724	.	-	.	gene_id "A3:chr6H:45626724-45626801:45626719-45626801:-"; transcript_id "A3:chr6H:45626724-45626801:45626719-45626801:-:alternative1";
chr6H	PanBaRT20_trans_aveTPM10.gtf	exon	45626801	45626901	.	-	.	gene_id "A3:chr6H:45626724-45626801:45626719-45626801:-"; transcript_id "A3:chr6H:45626724-45626801:45626719-45626801:-:alternative1";
chr6H	PanBaRT20_trans_aveTPM10.gtf	exon	45626619	45626719	.	-	.	gene_id "A3:chr6H:45626724-45626801:45626719-45626801:-"; transcript_id "A3:chr6H:45626724-45626801:45626719-45626801:-:alternative2";
chr6H	PanBaRT20_trans_aveTPM10.gtf	exon	45626801	45626901	.	-	.	gene_id "A3:chr6H:45626724-45626801:45626719-45626801:-"; transcript_id "A3:chr6H:45626724-45626801:45626719-45626801:-:alternative2";
chr6H	PanBaRT20_trans_aveTPM10.gtf	exon	109765155	109765261	.	-	.	gene_id "A3:chr6H:109765261-109766207:109765255-109766207:-"; transcript_id "A3:chr6H:109765261-109766207:109765255-109766207:-:alternative1";
chr6H	PanBaRT20_trans_aveTPM10.gtf	exon	109766207	109766307	.	-	.	gene_id "A3:chr6H:109765261-109766207:109765255-109766207:-"; transcript_id "A3:chr6H:109765261-109766207:109765255-109766207:-:alternative1";
chr6H	PanBaRT20_trans_aveTPM10.gtf	exon	109765155	109765255	.	-	.	gene_id "A3:chr6H:109765261-109766207:109765255-109766207:-"; transcript_id "A3:chr6H:109765261-109766207:109765255-109766207:-:alternative2";
chr6H	PanBaRT20_trans_aveTPM10.gtf	exon	109766207	109766307	.	-	.	gene_id "A3:chr6H:109765261-109766207:109765255-109766207:-"; transcript_id "A3:chr6H:109765261-109766207:109765255-109766207:-:alternative2";
chr6H	PanBaRT20_trans_aveTPM10.gtf	exon	124986141	124986252	.	-	.	gene_id "A3:chr6H:124986252-124986342:124986241-124986342:-"; transcript_id "A3:chr6H:124986252-124986342:124986241-124986342:-:alternative1";
chr6H	PanBaRT20_trans_aveTPM10.gtf	exon	124986342	124986442	.	-	.	gene_id "A3:chr6H:124986252-124986342:124986241-124986342:-"; transcript_id "A3:chr6H:124986252-124986342:124986241-124986342:-:alternative1";
chr6H	PanBaRT20_trans_aveTPM10.gtf	exon	124986141	124986241	.	-	.	gene_id "A3:chr6H:124986252-124986342:124986241-124986342:-"; transcript_id "A3:chr6H:124986252-124986342:124986241-124986342:-:alternative2";
chr6H	PanBaRT20_trans_aveTPM10.gtf	exon	124986342	124986442	.	-	.	gene_id "A3:chr6H:124986252-124986342:124986241-124986342:-"; transcript_id "A3:chr6H:124986252-124986342:124986241-124986342:-:alternative2";
chr6H	PanBaRT20_trans_aveTPM10.gtf	exon	281153499	281153604	.	-	.	gene_id "A3:chr6H:281153604-281167042:281153599-281167042:-"; transcript_id "A3:chr6H:281153604-281167042:281153599-281167042:-:alternative1";
chr6H	PanBaRT20_trans_aveTPM10.gtf	exon	281167042	281167142	.	-	.	gene_id "A3:chr6H:281153604-281167042:281153599-281167042:-"; transcript_id "A3:chr6H:281153604-281167042:281153599-281167042:-:alternative1";
chr6H	PanBaRT20_trans_aveTPM10.gtf	exon	281153499	281153599	.	-	.	gene_id "A3:chr6H:281153604-281167042:281153599-281167042:-"; transcript_id "A3:chr6H:281153604-281167042:281153599-281167042:-:alternative2";
chr6H	PanBaRT20_trans_aveTPM10.gtf	exon	281167042	281167142	.	-	.	gene_id "A3:chr6H:281153604-281167042:281153599-281167042:-"; transcript_id "A3:chr6H:281153604-281167042:281153599-281167042:-:alternative2";
chr6H	PanBaRT20_trans_aveTPM10.gtf	exon	353809533	353809645	.	-	.	gene_id "A3:chr6H:353809645-353809872:353809633-353809872:-"; transcript_id "A3:chr6H:353809645-353809872:353809633-353809872:-:alternative1";
chr6H	PanBaRT20_trans_aveTPM10.gtf	exon	353809872	353809972	.	-	.	gene_id "A3:chr6H:353809645-353809872:353809633-353809872:-"; transcript_id "A3:chr6H:353809645-353809872:353809633-353809872:-:alternative1";
chr6H	PanBaRT20_trans_aveTPM10.gtf	exon	353809533	353809633	.	-	.	gene_id "A3:chr6H:353809645-353809872:353809633-353809872:-"; transcript_id "A3:chr6H:353809645-353809872:353809633-353809872:-:alternative2";
chr6H	PanBaRT20_trans_aveTPM10.gtf	exon	353809872	353809972	.	-	.	gene_id "A3:chr6H:353809645-353809872:353809633-353809872:-"; transcript_id "A3:chr6H:353809645-353809872:353809633-353809872:-:alternative2";
chr6H	PanBaRT20_trans_aveTPM10.gtf	exon	518833508	518833624	.	-	.	gene_id "A3:chr6H:518833624-518834960:518833608-518834960:-"; transcript_id "A3:chr6H:518833624-518834960:518833608-518834960:-:alternative1";
chr6H	PanBaRT20_trans_aveTPM10.gtf	exon	518834960	518835060	.	-	.	gene_id "A3:chr6H:518833624-518834960:518833608-518834960:-"; transcript_id "A3:chr6H:518833624-518834960:518833608-518834960:-:alternative1";
chr6H	PanBaRT20_trans_aveTPM10.gtf	exon	518833508	518833608	.	-	.	gene_id "A3:chr6H:518833624-518834960:518833608-518834960:-"; transcript_id "A3:chr6H:518833624-518834960:518833608-518834960:-:alternative2";
chr6H	PanBaRT20_trans_aveTPM10.gtf	exon	518834960	518835060	.	-	.	gene_id "A3:chr6H:518833624-518834960:518833608-518834960:-"; transcript_id "A3:chr6H:518833624-518834960:518833608-518834960:-:alternative2";
chr6H	PanBaRT20_trans_aveTPM10.gtf	exon	581317865	581317973	.	-	.	gene_id "A3:chr6H:581317973-581318531:581317965-581318531:-"; transcript_id "A3:chr6H:581317973-581318531:581317965-581318531:-:alternative1";
chr6H	PanBaRT20_trans_aveTPM10.gtf	exon	581318531	581318631	.	-	.	gene_id "A3:chr6H:581317973-581318531:581317965-581318531:-"; transcript_id "A3:chr6H:581317973-581318531:581317965-581318531:-:alternative1";
chr6H	PanBaRT20_trans_aveTPM10.gtf	exon	581317865	581317965	.	-	.	gene_id "A3:chr6H:581317973-581318531:581317965-581318531:-"; transcript_id "A3:chr6H:581317973-581318531:581317965-581318531:-:alternative2";
chr6H	PanBaRT20_trans_aveTPM10.gtf	exon	581318531	581318631	.	-	.	gene_id "A3:chr6H:581317973-581318531:581317965-581318531:-"; transcript_id "A3:chr6H:581317973-581318531:581317965-581318531:-:alternative2";
chr6H	PanBaRT20_trans_aveTPM10.gtf	exon	594281383	594281495	.	-	.	gene_id "A3:chr6H:594281495-594282396:594281483-594282396:-"; transcript_id "A3:chr6H:594281495-594282396:594281483-594282396:-:alternative1";
chr6H	PanBaRT20_trans_aveTPM10.gtf	exon	594282396	594282496	.	-	.	gene_id "A3:chr6H:594281495-594282396:594281483-594282396:-"; transcript_id "A3:chr6H:594281495-594282396:594281483-594282396:-:alternative1";
chr6H	PanBaRT20_trans_aveTPM10.gtf	exon	594281383	594281483	.	-	.	gene_id "A3:chr6H:594281495-594282396:594281483-594282396:-"; transcript_id "A3:chr6H:594281495-594282396:594281483-594282396:-:alternative2";
chr6H	PanBaRT20_trans_aveTPM10.gtf	exon	594282396	594282496	.	-	.	gene_id "A3:chr6H:594281495-594282396:594281483-594282396:-"; transcript_id "A3:chr6H:594281495-594282396:594281483-594282396:-:alternative2";
chr6H	PanBaRT20_trans_aveTPM10.gtf	exon	605675022	605675128	.	-	.	gene_id "A3:chr6H:605675128-605676440:605675122-605676440:-"; transcript_id "A3:chr6H:605675128-605676440:605675122-605676440:-:alternative1";
chr6H	PanBaRT20_trans_aveTPM10.gtf	exon	605676440	605676540	.	-	.	gene_id "A3:chr6H:605675128-605676440:605675122-605676440:-"; transcript_id "A3:chr6H:605675128-605676440:605675122-605676440:-:alternative1";
chr6H	PanBaRT20_trans_aveTPM10.gtf	exon	605675022	605675122	.	-	.	gene_id "A3:chr6H:605675128-605676440:605675122-605676440:-"; transcript_id "A3:chr6H:605675128-605676440:605675122-605676440:-:alternative2";
chr6H	PanBaRT20_trans_aveTPM10.gtf	exon	605676440	605676540	.	-	.	gene_id "A3:chr6H:605675128-605676440:605675122-605676440:-"; transcript_id "A3:chr6H:605675128-605676440:605675122-605676440:-:alternative2";
chr6H	PanBaRT20_trans_aveTPM10.gtf	exon	605946722	605946825	.	-	.	gene_id "A3:chr6H:605946825-605947014:605946822-605947014:-"; transcript_id "A3:chr6H:605946825-605947014:605946822-605947014:-:alternative1";
chr6H	PanBaRT20_trans_aveTPM10.gtf	exon	605947014	605947114	.	-	.	gene_id "A3:chr6H:605946825-605947014:605946822-605947014:-"; transcript_id "A3:chr6H:605946825-605947014:605946822-605947014:-:alternative1";
chr6H	PanBaRT20_trans_aveTPM10.gtf	exon	605946722	605946822	.	-	.	gene_id "A3:chr6H:605946825-605947014:605946822-605947014:-"; transcript_id "A3:chr6H:605946825-605947014:605946822-605947014:-:alternative2";
chr6H	PanBaRT20_trans_aveTPM10.gtf	exon	605947014	605947114	.	-	.	gene_id "A3:chr6H:605946825-605947014:605946822-605947014:-"; transcript_id "A3:chr6H:605946825-605947014:605946822-605947014:-:alternative2";
chr6H	PanBaRT20_trans_aveTPM10.gtf	exon	25433000	25433100	.	+	.	gene_id "A3:chr6H:25433100-25434583:25433100-25434683:+"; transcript_id "A3:chr6H:25433100-25434583:25433100-25434683:+:alternative1";
chr6H	PanBaRT20_trans_aveTPM10.gtf	exon	25434583	25434783	.	+	.	gene_id "A3:chr6H:25433100-25434583:25433100-25434683:+"; transcript_id "A3:chr6H:25433100-25434583:25433100-25434683:+:alternative1";
chr6H	PanBaRT20_trans_aveTPM10.gtf	exon	25433000	25433100	.	+	.	gene_id "A3:chr6H:25433100-25434583:25433100-25434683:+"; transcript_id "A3:chr6H:25433100-25434583:25433100-25434683:+:alternative2";
chr6H	PanBaRT20_trans_aveTPM10.gtf	exon	25434683	25434783	.	+	.	gene_id "A3:chr6H:25433100-25434583:25433100-25434683:+"; transcript_id "A3:chr6H:25433100-25434583:25433100-25434683:+:alternative2";
chr6H	PanBaRT20_trans_aveTPM10.gtf	exon	28308376	28308476	.	+	.	gene_id "A3:chr6H:28308476-28308586:28308476-28308596:+"; transcript_id "A3:chr6H:28308476-28308586:28308476-28308596:+:alternative1";
chr6H	PanBaRT20_trans_aveTPM10.gtf	exon	28308586	28308696	.	+	.	gene_id "A3:chr6H:28308476-28308586:28308476-28308596:+"; transcript_id "A3:chr6H:28308476-28308586:28308476-28308596:+:alternative1";
chr6H	PanBaRT20_trans_aveTPM10.gtf	exon	28308376	28308476	.	+	.	gene_id "A3:chr6H:28308476-28308586:28308476-28308596:+"; transcript_id "A3:chr6H:28308476-28308586:28308476-28308596:+:alternative2";
chr6H	PanBaRT20_trans_aveTPM10.gtf	exon	28308596	28308696	.	+	.	gene_id "A3:chr6H:28308476-28308586:28308476-28308596:+"; transcript_id "A3:chr6H:28308476-28308586:28308476-28308596:+:alternative2";
chr6H	PanBaRT20_trans_aveTPM10.gtf	exon	38043338	38043438	.	+	.	gene_id "A3:chr6H:38043438-38044261:38043438-38044268:+"; transcript_id "A3:chr6H:38043438-38044261:38043438-38044268:+:alternative1";
chr6H	PanBaRT20_trans_aveTPM10.gtf	exon	38044261	38044368	.	+	.	gene_id "A3:chr6H:38043438-38044261:38043438-38044268:+"; transcript_id "A3:chr6H:38043438-38044261:38043438-38044268:+:alternative1";
chr6H	PanBaRT20_trans_aveTPM10.gtf	exon	38043338	38043438	.	+	.	gene_id "A3:chr6H:38043438-38044261:38043438-38044268:+"; transcript_id "A3:chr6H:38043438-38044261:38043438-38044268:+:alternative2";
chr6H	PanBaRT20_trans_aveTPM10.gtf	exon	38044268	38044368	.	+	.	gene_id "A3:chr6H:38043438-38044261:38043438-38044268:+"; transcript_id "A3:chr6H:38043438-38044261:38043438-38044268:+:alternative2";
chr6H	PanBaRT20_trans_aveTPM10.gtf	exon	40027876	40027976	.	+	.	gene_id "A3:chr6H:40027976-40028727:40027976-40028814:+"; transcript_id "A3:chr6H:40027976-40028727:40027976-40028814:+:alternative1";
chr6H	PanBaRT20_trans_aveTPM10.gtf	exon	40028727	40028914	.	+	.	gene_id "A3:chr6H:40027976-40028727:40027976-40028814:+"; transcript_id "A3:chr6H:40027976-40028727:40027976-40028814:+:alternative1";
chr6H	PanBaRT20_trans_aveTPM10.gtf	exon	40027876	40027976	.	+	.	gene_id "A3:chr6H:40027976-40028727:40027976-40028814:+"; transcript_id "A3:chr6H:40027976-40028727:40027976-40028814:+:alternative2";
chr6H	PanBaRT20_trans_aveTPM10.gtf	exon	40028814	40028914	.	+	.	gene_id "A3:chr6H:40027976-40028727:40027976-40028814:+"; transcript_id "A3:chr6H:40027976-40028727:40027976-40028814:+:alternative2";
chr6H	PanBaRT20_trans_aveTPM10.gtf	exon	103526148	103526248	.	+	.	gene_id "A3:chr6H:103526248-103527785:103526248-103527791:+"; transcript_id "A3:chr6H:103526248-103527785:103526248-103527791:+:alternative1";
chr6H	PanBaRT20_trans_aveTPM10.gtf	exon	103527785	103527891	.	+	.	gene_id "A3:chr6H:103526248-103527785:103526248-103527791:+"; transcript_id "A3:chr6H:103526248-103527785:103526248-103527791:+:alternative1";
chr6H	PanBaRT20_trans_aveTPM10.gtf	exon	103526148	103526248	.	+	.	gene_id "A3:chr6H:103526248-103527785:103526248-103527791:+"; transcript_id "A3:chr6H:103526248-103527785:103526248-103527791:+:alternative2";
chr6H	PanBaRT20_trans_aveTPM10.gtf	exon	103527791	103527891	.	+	.	gene_id "A3:chr6H:103526248-103527785:103526248-103527791:+"; transcript_id "A3:chr6H:103526248-103527785:103526248-103527791:+:alternative2";
chr6H	PanBaRT20_trans_aveTPM10.gtf	exon	121121491	121121591	.	+	.	gene_id "A3:chr6H:121121591-121121686:121121591-121121690:+"; transcript_id "A3:chr6H:121121591-121121686:121121591-121121690:+:alternative1";
chr6H	PanBaRT20_trans_aveTPM10.gtf	exon	121121686	121121790	.	+	.	gene_id "A3:chr6H:121121591-121121686:121121591-121121690:+"; transcript_id "A3:chr6H:121121591-121121686:121121591-121121690:+:alternative1";
chr6H	PanBaRT20_trans_aveTPM10.gtf	exon	121121491	121121591	.	+	.	gene_id "A3:chr6H:121121591-121121686:121121591-121121690:+"; transcript_id "A3:chr6H:121121591-121121686:121121591-121121690:+:alternative2";
chr6H	PanBaRT20_trans_aveTPM10.gtf	exon	121121690	121121790	.	+	.	gene_id "A3:chr6H:121121591-121121686:121121591-121121690:+"; transcript_id "A3:chr6H:121121591-121121686:121121591-121121690:+:alternative2";
chr6H	PanBaRT20_trans_aveTPM10.gtf	exon	193747605	193747705	.	+	.	gene_id "A3:chr6H:193747705-193747827:193747705-193747830:+"; transcript_id "A3:chr6H:193747705-193747827:193747705-193747830:+:alternative1";
chr6H	PanBaRT20_trans_aveTPM10.gtf	exon	193747827	193747930	.	+	.	gene_id "A3:chr6H:193747705-193747827:193747705-193747830:+"; transcript_id "A3:chr6H:193747705-193747827:193747705-193747830:+:alternative1";
chr6H	PanBaRT20_trans_aveTPM10.gtf	exon	193747605	193747705	.	+	.	gene_id "A3:chr6H:193747705-193747827:193747705-193747830:+"; transcript_id "A3:chr6H:193747705-193747827:193747705-193747830:+:alternative2";
chr6H	PanBaRT20_trans_aveTPM10.gtf	exon	193747830	193747930	.	+	.	gene_id "A3:chr6H:193747705-193747827:193747705-193747830:+"; transcript_id "A3:chr6H:193747705-193747827:193747705-193747830:+:alternative2";
chr6H	PanBaRT20_trans_aveTPM10.gtf	exon	251427270	251427370	.	+	.	gene_id "A3:chr6H:251427370-251427544:251427370-251427574:+"; transcript_id "A3:chr6H:251427370-251427544:251427370-251427574:+:alternative1";
chr6H	PanBaRT20_trans_aveTPM10.gtf	exon	251427544	251427674	.	+	.	gene_id "A3:chr6H:251427370-251427544:251427370-251427574:+"; transcript_id "A3:chr6H:251427370-251427544:251427370-251427574:+:alternative1";
chr6H	PanBaRT20_trans_aveTPM10.gtf	exon	251427270	251427370	.	+	.	gene_id "A3:chr6H:251427370-251427544:251427370-251427574:+"; transcript_id "A3:chr6H:251427370-251427544:251427370-251427574:+:alternative2";
chr6H	PanBaRT20_trans_aveTPM10.gtf	exon	251427574	251427674	.	+	.	gene_id "A3:chr6H:251427370-251427544:251427370-251427574:+"; transcript_id "A3:chr6H:251427370-251427544:251427370-251427574:+:alternative2";
chr6H	PanBaRT20_trans_aveTPM10.gtf	exon	320301972	320302072	.	+	.	gene_id "A3:chr6H:320302072-320302664:320302072-320302667:+"; transcript_id "A3:chr6H:320302072-320302664:320302072-320302667:+:alternative1";
chr6H	PanBaRT20_trans_aveTPM10.gtf	exon	320302664	320302767	.	+	.	gene_id "A3:chr6H:320302072-320302664:320302072-320302667:+"; transcript_id "A3:chr6H:320302072-320302664:320302072-320302667:+:alternative1";
chr6H	PanBaRT20_trans_aveTPM10.gtf	exon	320301972	320302072	.	+	.	gene_id "A3:chr6H:320302072-320302664:320302072-320302667:+"; transcript_id "A3:chr6H:320302072-320302664:320302072-320302667:+:alternative2";
chr6H	PanBaRT20_trans_aveTPM10.gtf	exon	320302667	320302767	.	+	.	gene_id "A3:chr6H:320302072-320302664:320302072-320302667:+"; transcript_id "A3:chr6H:320302072-320302664:320302072-320302667:+:alternative2";
chr6H	PanBaRT20_trans_aveTPM10.gtf	exon	362940952	362941052	.	+	.	gene_id "A3:chr6H:362941052-362943157:362941052-362943164:+"; transcript_id "A3:chr6H:362941052-362943157:362941052-362943164:+:alternative1";
chr6H	PanBaRT20_trans_aveTPM10.gtf	exon	362943157	362943264	.	+	.	gene_id "A3:chr6H:362941052-362943157:362941052-362943164:+"; transcript_id "A3:chr6H:362941052-362943157:362941052-362943164:+:alternative1";
chr6H	PanBaRT20_trans_aveTPM10.gtf	exon	362940952	362941052	.	+	.	gene_id "A3:chr6H:362941052-362943157:362941052-362943164:+"; transcript_id "A3:chr6H:362941052-362943157:362941052-362943164:+:alternative2";
chr6H	PanBaRT20_trans_aveTPM10.gtf	exon	362943164	362943264	.	+	.	gene_id "A3:chr6H:362941052-362943157:362941052-362943164:+"; transcript_id "A3:chr6H:362941052-362943157:362941052-362943164:+:alternative2";
chr6H	PanBaRT20_trans_aveTPM10.gtf	exon	362946238	362946338	.	+	.	gene_id "A3:chr6H:362946338-362946483:362946338-362946503:+"; transcript_id "A3:chr6H:362946338-362946483:362946338-362946503:+:alternative1";
chr6H	PanBaRT20_trans_aveTPM10.gtf	exon	362946483	362946603	.	+	.	gene_id "A3:chr6H:362946338-362946483:362946338-362946503:+"; transcript_id "A3:chr6H:362946338-362946483:362946338-362946503:+:alternative1";
chr6H	PanBaRT20_trans_aveTPM10.gtf	exon	362946238	362946338	.	+	.	gene_id "A3:chr6H:362946338-362946483:362946338-362946503:+"; transcript_id "A3:chr6H:362946338-362946483:362946338-362946503:+:alternative2";
chr6H	PanBaRT20_trans_aveTPM10.gtf	exon	362946503	362946603	.	+	.	gene_id "A3:chr6H:362946338-362946483:362946338-362946503:+"; transcript_id "A3:chr6H:362946338-362946483:362946338-362946503:+:alternative2";
chr6H	PanBaRT20_trans_aveTPM10.gtf	exon	371977323	371977423	.	+	.	gene_id "A3:chr6H:371977423-371977535:371977423-371977547:+"; transcript_id "A3:chr6H:371977423-371977535:371977423-371977547:+:alternative1";
chr6H	PanBaRT20_trans_aveTPM10.gtf	exon	371977535	371977647	.	+	.	gene_id "A3:chr6H:371977423-371977535:371977423-371977547:+"; transcript_id "A3:chr6H:371977423-371977535:371977423-371977547:+:alternative1";
chr6H	PanBaRT20_trans_aveTPM10.gtf	exon	371977323	371977423	.	+	.	gene_id "A3:chr6H:371977423-371977535:371977423-371977547:+"; transcript_id "A3:chr6H:371977423-371977535:371977423-371977547:+:alternative2";
chr6H	PanBaRT20_trans_aveTPM10.gtf	exon	371977547	371977647	.	+	.	gene_id "A3:chr6H:371977423-371977535:371977423-371977547:+"; transcript_id "A3:chr6H:371977423-371977535:371977423-371977547:+:alternative2";
chr6H	PanBaRT20_trans_aveTPM10.gtf	exon	399083738	399083838	.	+	.	gene_id "A3:chr6H:399083838-399083942:399083838-399083947:+"; transcript_id "A3:chr6H:399083838-399083942:399083838-399083947:+:alternative1";
chr6H	PanBaRT20_trans_aveTPM10.gtf	exon	399083942	399084047	.	+	.	gene_id "A3:chr6H:399083838-399083942:399083838-399083947:+"; transcript_id "A3:chr6H:399083838-399083942:399083838-399083947:+:alternative1";
chr6H	PanBaRT20_trans_aveTPM10.gtf	exon	399083738	399083838	.	+	.	gene_id "A3:chr6H:399083838-399083942:399083838-399083947:+"; transcript_id "A3:chr6H:399083838-399083942:399083838-399083947:+:alternative2";
chr6H	PanBaRT20_trans_aveTPM10.gtf	exon	399083947	399084047	.	+	.	gene_id "A3:chr6H:399083838-399083942:399083838-399083947:+"; transcript_id "A3:chr6H:399083838-399083942:399083838-399083947:+:alternative2";
chr6H	PanBaRT20_trans_aveTPM10.gtf	exon	431143367	431143467	.	+	.	gene_id "A3:chr6H:431143467-431144516:431143467-431144519:+"; transcript_id "A3:chr6H:431143467-431144516:431143467-431144519:+:alternative1";
chr6H	PanBaRT20_trans_aveTPM10.gtf	exon	431144516	431144619	.	+	.	gene_id "A3:chr6H:431143467-431144516:431143467-431144519:+"; transcript_id "A3:chr6H:431143467-431144516:431143467-431144519:+:alternative1";
chr6H	PanBaRT20_trans_aveTPM10.gtf	exon	431143367	431143467	.	+	.	gene_id "A3:chr6H:431143467-431144516:431143467-431144519:+"; transcript_id "A3:chr6H:431143467-431144516:431143467-431144519:+:alternative2";
chr6H	PanBaRT20_trans_aveTPM10.gtf	exon	431144519	431144619	.	+	.	gene_id "A3:chr6H:431143467-431144516:431143467-431144519:+"; transcript_id "A3:chr6H:431143467-431144516:431143467-431144519:+:alternative2";
chr6H	PanBaRT20_trans_aveTPM10.gtf	exon	448372711	448372811	.	+	.	gene_id "A3:chr6H:448372811-448373632:448372811-448374532:+"; transcript_id "A3:chr6H:448372811-448373632:448372811-448374532:+:alternative1";
chr6H	PanBaRT20_trans_aveTPM10.gtf	exon	448373632	448374632	.	+	.	gene_id "A3:chr6H:448372811-448373632:448372811-448374532:+"; transcript_id "A3:chr6H:448372811-448373632:448372811-448374532:+:alternative1";
chr6H	PanBaRT20_trans_aveTPM10.gtf	exon	448372711	448372811	.	+	.	gene_id "A3:chr6H:448372811-448373632:448372811-448374532:+"; transcript_id "A3:chr6H:448372811-448373632:448372811-448374532:+:alternative2";
chr6H	PanBaRT20_trans_aveTPM10.gtf	exon	448374532	448374632	.	+	.	gene_id "A3:chr6H:448372811-448373632:448372811-448374532:+"; transcript_id "A3:chr6H:448372811-448373632:448372811-448374532:+:alternative2";
chr6H	PanBaRT20_trans_aveTPM10.gtf	exon	460701486	460701586	.	+	.	gene_id "A3:chr6H:460701586-460701675:460701586-460701684:+"; transcript_id "A3:chr6H:460701586-460701675:460701586-460701684:+:alternative1";
chr6H	PanBaRT20_trans_aveTPM10.gtf	exon	460701675	460701784	.	+	.	gene_id "A3:chr6H:460701586-460701675:460701586-460701684:+"; transcript_id "A3:chr6H:460701586-460701675:460701586-460701684:+:alternative1";
chr6H	PanBaRT20_trans_aveTPM10.gtf	exon	460701486	460701586	.	+	.	gene_id "A3:chr6H:460701586-460701675:460701586-460701684:+"; transcript_id "A3:chr6H:460701586-460701675:460701586-460701684:+:alternative2";
chr6H	PanBaRT20_trans_aveTPM10.gtf	exon	460701684	460701784	.	+	.	gene_id "A3:chr6H:460701586-460701675:460701586-460701684:+"; transcript_id "A3:chr6H:460701586-460701675:460701586-460701684:+:alternative2";
chr6H	PanBaRT20_trans_aveTPM10.gtf	exon	520155105	520155205	.	+	.	gene_id "A3:chr6H:520155205-520155294:520155205-520155297:+"; transcript_id "A3:chr6H:520155205-520155294:520155205-520155297:+:alternative1";
chr6H	PanBaRT20_trans_aveTPM10.gtf	exon	520155294	520155397	.	+	.	gene_id "A3:chr6H:520155205-520155294:520155205-520155297:+"; transcript_id "A3:chr6H:520155205-520155294:520155205-520155297:+:alternative1";
chr6H	PanBaRT20_trans_aveTPM10.gtf	exon	520155105	520155205	.	+	.	gene_id "A3:chr6H:520155205-520155294:520155205-520155297:+"; transcript_id "A3:chr6H:520155205-520155294:520155205-520155297:+:alternative2";
chr6H	PanBaRT20_trans_aveTPM10.gtf	exon	520155297	520155397	.	+	.	gene_id "A3:chr6H:520155205-520155294:520155205-520155297:+"; transcript_id "A3:chr6H:520155205-520155294:520155205-520155297:+:alternative2";
chr6H	PanBaRT20_trans_aveTPM10.gtf	exon	558439600	558439700	.	+	.	gene_id "A3:chr6H:558439700-558439799:558439700-558439811:+"; transcript_id "A3:chr6H:558439700-558439799:558439700-558439811:+:alternative1";
chr6H	PanBaRT20_trans_aveTPM10.gtf	exon	558439799	558439911	.	+	.	gene_id "A3:chr6H:558439700-558439799:558439700-558439811:+"; transcript_id "A3:chr6H:558439700-558439799:558439700-558439811:+:alternative1";
chr6H	PanBaRT20_trans_aveTPM10.gtf	exon	558439600	558439700	.	+	.	gene_id "A3:chr6H:558439700-558439799:558439700-558439811:+"; transcript_id "A3:chr6H:558439700-558439799:558439700-558439811:+:alternative2";
chr6H	PanBaRT20_trans_aveTPM10.gtf	exon	558439811	558439911	.	+	.	gene_id "A3:chr6H:558439700-558439799:558439700-558439811:+"; transcript_id "A3:chr6H:558439700-558439799:558439700-558439811:+:alternative2";
chr7H	PanBaRT20_trans_aveTPM10.gtf	exon	37447236	37447457	.	-	.	gene_id "A3:chr7H:37447457-37447603:37447336-37447603:-"; transcript_id "A3:chr7H:37447457-37447603:37447336-37447603:-:alternative1";
chr7H	PanBaRT20_trans_aveTPM10.gtf	exon	37447603	37447703	.	-	.	gene_id "A3:chr7H:37447457-37447603:37447336-37447603:-"; transcript_id "A3:chr7H:37447457-37447603:37447336-37447603:-:alternative1";
chr7H	PanBaRT20_trans_aveTPM10.gtf	exon	37447236	37447336	.	-	.	gene_id "A3:chr7H:37447457-37447603:37447336-37447603:-"; transcript_id "A3:chr7H:37447457-37447603:37447336-37447603:-:alternative2";
chr7H	PanBaRT20_trans_aveTPM10.gtf	exon	37447603	37447703	.	-	.	gene_id "A3:chr7H:37447457-37447603:37447336-37447603:-"; transcript_id "A3:chr7H:37447457-37447603:37447336-37447603:-:alternative2";
chr7H	PanBaRT20_trans_aveTPM10.gtf	exon	79453236	79453346	.	-	.	gene_id "A3:chr7H:79453346-79453434:79453336-79453434:-"; transcript_id "A3:chr7H:79453346-79453434:79453336-79453434:-:alternative1";
chr7H	PanBaRT20_trans_aveTPM10.gtf	exon	79453434	79453534	.	-	.	gene_id "A3:chr7H:79453346-79453434:79453336-79453434:-"; transcript_id "A3:chr7H:79453346-79453434:79453336-79453434:-:alternative1";
chr7H	PanBaRT20_trans_aveTPM10.gtf	exon	79453236	79453336	.	-	.	gene_id "A3:chr7H:79453346-79453434:79453336-79453434:-"; transcript_id "A3:chr7H:79453346-79453434:79453336-79453434:-:alternative2";
chr7H	PanBaRT20_trans_aveTPM10.gtf	exon	79453434	79453534	.	-	.	gene_id "A3:chr7H:79453346-79453434:79453336-79453434:-"; transcript_id "A3:chr7H:79453346-79453434:79453336-79453434:-:alternative2";
chr7H	PanBaRT20_trans_aveTPM10.gtf	exon	96978990	96979098	.	-	.	gene_id "A3:chr7H:96979098-96979182:96979090-96979182:-"; transcript_id "A3:chr7H:96979098-96979182:96979090-96979182:-:alternative1";
chr7H	PanBaRT20_trans_aveTPM10.gtf	exon	96979182	96979282	.	-	.	gene_id "A3:chr7H:96979098-96979182:96979090-96979182:-"; transcript_id "A3:chr7H:96979098-96979182:96979090-96979182:-:alternative1";
chr7H	PanBaRT20_trans_aveTPM10.gtf	exon	96978990	96979090	.	-	.	gene_id "A3:chr7H:96979098-96979182:96979090-96979182:-"; transcript_id "A3:chr7H:96979098-96979182:96979090-96979182:-:alternative2";
chr7H	PanBaRT20_trans_aveTPM10.gtf	exon	96979182	96979282	.	-	.	gene_id "A3:chr7H:96979098-96979182:96979090-96979182:-"; transcript_id "A3:chr7H:96979098-96979182:96979090-96979182:-:alternative2";
chr7H	PanBaRT20_trans_aveTPM10.gtf	exon	252218087	252218204	.	-	.	gene_id "A3:chr7H:252218204-252218372:252218187-252218372:-"; transcript_id "A3:chr7H:252218204-252218372:252218187-252218372:-:alternative1";
chr7H	PanBaRT20_trans_aveTPM10.gtf	exon	252218372	252218472	.	-	.	gene_id "A3:chr7H:252218204-252218372:252218187-252218372:-"; transcript_id "A3:chr7H:252218204-252218372:252218187-252218372:-:alternative1";
chr7H	PanBaRT20_trans_aveTPM10.gtf	exon	252218087	252218187	.	-	.	gene_id "A3:chr7H:252218204-252218372:252218187-252218372:-"; transcript_id "A3:chr7H:252218204-252218372:252218187-252218372:-:alternative2";
chr7H	PanBaRT20_trans_aveTPM10.gtf	exon	252218372	252218472	.	-	.	gene_id "A3:chr7H:252218204-252218372:252218187-252218372:-"; transcript_id "A3:chr7H:252218204-252218372:252218187-252218372:-:alternative2";
chr7H	PanBaRT20_trans_aveTPM10.gtf	exon	311410513	311410616	.	-	.	gene_id "A3:chr7H:311410616-311410702:311410613-311410702:-"; transcript_id "A3:chr7H:311410616-311410702:311410613-311410702:-:alternative1";
chr7H	PanBaRT20_trans_aveTPM10.gtf	exon	311410702	311410802	.	-	.	gene_id "A3:chr7H:311410616-311410702:311410613-311410702:-"; transcript_id "A3:chr7H:311410616-311410702:311410613-311410702:-:alternative1";
chr7H	PanBaRT20_trans_aveTPM10.gtf	exon	311410513	311410613	.	-	.	gene_id "A3:chr7H:311410616-311410702:311410613-311410702:-"; transcript_id "A3:chr7H:311410616-311410702:311410613-311410702:-:alternative2";
chr7H	PanBaRT20_trans_aveTPM10.gtf	exon	311410702	311410802	.	-	.	gene_id "A3:chr7H:311410616-311410702:311410613-311410702:-"; transcript_id "A3:chr7H:311410616-311410702:311410613-311410702:-:alternative2";
chr7H	PanBaRT20_trans_aveTPM10.gtf	exon	385669020	385669123	.	-	.	gene_id "A3:chr7H:385669123-385669202:385669120-385669202:-"; transcript_id "A3:chr7H:385669123-385669202:385669120-385669202:-:alternative1";
chr7H	PanBaRT20_trans_aveTPM10.gtf	exon	385669202	385669302	.	-	.	gene_id "A3:chr7H:385669123-385669202:385669120-385669202:-"; transcript_id "A3:chr7H:385669123-385669202:385669120-385669202:-:alternative1";
chr7H	PanBaRT20_trans_aveTPM10.gtf	exon	385669020	385669120	.	-	.	gene_id "A3:chr7H:385669123-385669202:385669120-385669202:-"; transcript_id "A3:chr7H:385669123-385669202:385669120-385669202:-:alternative2";
chr7H	PanBaRT20_trans_aveTPM10.gtf	exon	385669202	385669302	.	-	.	gene_id "A3:chr7H:385669123-385669202:385669120-385669202:-"; transcript_id "A3:chr7H:385669123-385669202:385669120-385669202:-:alternative2";
chr7H	PanBaRT20_trans_aveTPM10.gtf	exon	408229047	408229150	.	-	.	gene_id "A3:chr7H:408229150-408229256:408229147-408229256:-"; transcript_id "A3:chr7H:408229150-408229256:408229147-408229256:-:alternative1";
chr7H	PanBaRT20_trans_aveTPM10.gtf	exon	408229256	408229356	.	-	.	gene_id "A3:chr7H:408229150-408229256:408229147-408229256:-"; transcript_id "A3:chr7H:408229150-408229256:408229147-408229256:-:alternative1";
chr7H	PanBaRT20_trans_aveTPM10.gtf	exon	408229047	408229147	.	-	.	gene_id "A3:chr7H:408229150-408229256:408229147-408229256:-"; transcript_id "A3:chr7H:408229150-408229256:408229147-408229256:-:alternative2";
chr7H	PanBaRT20_trans_aveTPM10.gtf	exon	408229256	408229356	.	-	.	gene_id "A3:chr7H:408229150-408229256:408229147-408229256:-"; transcript_id "A3:chr7H:408229150-408229256:408229147-408229256:-:alternative2";
chr7H	PanBaRT20_trans_aveTPM10.gtf	exon	428057275	428057390	.	-	.	gene_id "A3:chr7H:428057390-428057500:428057375-428057500:-"; transcript_id "A3:chr7H:428057390-428057500:428057375-428057500:-:alternative1";
chr7H	PanBaRT20_trans_aveTPM10.gtf	exon	428057500	428057600	.	-	.	gene_id "A3:chr7H:428057390-428057500:428057375-428057500:-"; transcript_id "A3:chr7H:428057390-428057500:428057375-428057500:-:alternative1";
chr7H	PanBaRT20_trans_aveTPM10.gtf	exon	428057275	428057375	.	-	.	gene_id "A3:chr7H:428057390-428057500:428057375-428057500:-"; transcript_id "A3:chr7H:428057390-428057500:428057375-428057500:-:alternative2";
chr7H	PanBaRT20_trans_aveTPM10.gtf	exon	428057500	428057600	.	-	.	gene_id "A3:chr7H:428057390-428057500:428057375-428057500:-"; transcript_id "A3:chr7H:428057390-428057500:428057375-428057500:-:alternative2";
chr7H	PanBaRT20_trans_aveTPM10.gtf	exon	445923971	445924077	.	-	.	gene_id "A3:chr7H:445924077-445925156:445924071-445925156:-"; transcript_id "A3:chr7H:445924077-445925156:445924071-445925156:-:alternative1";
chr7H	PanBaRT20_trans_aveTPM10.gtf	exon	445925156	445925256	.	-	.	gene_id "A3:chr7H:445924077-445925156:445924071-445925156:-"; transcript_id "A3:chr7H:445924077-445925156:445924071-445925156:-:alternative1";
chr7H	PanBaRT20_trans_aveTPM10.gtf	exon	445923971	445924071	.	-	.	gene_id "A3:chr7H:445924077-445925156:445924071-445925156:-"; transcript_id "A3:chr7H:445924077-445925156:445924071-445925156:-:alternative2";
chr7H	PanBaRT20_trans_aveTPM10.gtf	exon	445925156	445925256	.	-	.	gene_id "A3:chr7H:445924077-445925156:445924071-445925156:-"; transcript_id "A3:chr7H:445924077-445925156:445924071-445925156:-:alternative2";
chr7H	PanBaRT20_trans_aveTPM10.gtf	exon	456720785	456721039	.	-	.	gene_id "A3:chr7H:456721039-456721224:456720885-456721224:-"; transcript_id "A3:chr7H:456721039-456721224:456720885-456721224:-:alternative1";
chr7H	PanBaRT20_trans_aveTPM10.gtf	exon	456721224	456721324	.	-	.	gene_id "A3:chr7H:456721039-456721224:456720885-456721224:-"; transcript_id "A3:chr7H:456721039-456721224:456720885-456721224:-:alternative1";
chr7H	PanBaRT20_trans_aveTPM10.gtf	exon	456720785	456720885	.	-	.	gene_id "A3:chr7H:456721039-456721224:456720885-456721224:-"; transcript_id "A3:chr7H:456721039-456721224:456720885-456721224:-:alternative2";
chr7H	PanBaRT20_trans_aveTPM10.gtf	exon	456721224	456721324	.	-	.	gene_id "A3:chr7H:456721039-456721224:456720885-456721224:-"; transcript_id "A3:chr7H:456721039-456721224:456720885-456721224:-:alternative2";
chr7H	PanBaRT20_trans_aveTPM10.gtf	exon	456721467	456721575	.	-	.	gene_id "A3:chr7H:456721575-456721791:456721567-456721791:-"; transcript_id "A3:chr7H:456721575-456721791:456721567-456721791:-:alternative1";
chr7H	PanBaRT20_trans_aveTPM10.gtf	exon	456721791	456721891	.	-	.	gene_id "A3:chr7H:456721575-456721791:456721567-456721791:-"; transcript_id "A3:chr7H:456721575-456721791:456721567-456721791:-:alternative1";
chr7H	PanBaRT20_trans_aveTPM10.gtf	exon	456721467	456721567	.	-	.	gene_id "A3:chr7H:456721575-456721791:456721567-456721791:-"; transcript_id "A3:chr7H:456721575-456721791:456721567-456721791:-:alternative2";
chr7H	PanBaRT20_trans_aveTPM10.gtf	exon	456721791	456721891	.	-	.	gene_id "A3:chr7H:456721575-456721791:456721567-456721791:-"; transcript_id "A3:chr7H:456721575-456721791:456721567-456721791:-:alternative2";
chr7H	PanBaRT20_trans_aveTPM10.gtf	exon	474514223	474514329	.	-	.	gene_id "A3:chr7H:474514329-474514416:474514323-474514416:-"; transcript_id "A3:chr7H:474514329-474514416:474514323-474514416:-:alternative1";
chr7H	PanBaRT20_trans_aveTPM10.gtf	exon	474514416	474514516	.	-	.	gene_id "A3:chr7H:474514329-474514416:474514323-474514416:-"; transcript_id "A3:chr7H:474514329-474514416:474514323-474514416:-:alternative1";
chr7H	PanBaRT20_trans_aveTPM10.gtf	exon	474514223	474514323	.	-	.	gene_id "A3:chr7H:474514329-474514416:474514323-474514416:-"; transcript_id "A3:chr7H:474514329-474514416:474514323-474514416:-:alternative2";
chr7H	PanBaRT20_trans_aveTPM10.gtf	exon	474514416	474514516	.	-	.	gene_id "A3:chr7H:474514329-474514416:474514323-474514416:-"; transcript_id "A3:chr7H:474514329-474514416:474514323-474514416:-:alternative2";
chr7H	PanBaRT20_trans_aveTPM10.gtf	exon	541034267	541034377	.	-	.	gene_id "A3:chr7H:541034377-541035265:541034367-541035265:-"; transcript_id "A3:chr7H:541034377-541035265:541034367-541035265:-:alternative1";
chr7H	PanBaRT20_trans_aveTPM10.gtf	exon	541035265	541035365	.	-	.	gene_id "A3:chr7H:541034377-541035265:541034367-541035265:-"; transcript_id "A3:chr7H:541034377-541035265:541034367-541035265:-:alternative1";
chr7H	PanBaRT20_trans_aveTPM10.gtf	exon	541034267	541034367	.	-	.	gene_id "A3:chr7H:541034377-541035265:541034367-541035265:-"; transcript_id "A3:chr7H:541034377-541035265:541034367-541035265:-:alternative2";
chr7H	PanBaRT20_trans_aveTPM10.gtf	exon	541035265	541035365	.	-	.	gene_id "A3:chr7H:541034377-541035265:541034367-541035265:-"; transcript_id "A3:chr7H:541034377-541035265:541034367-541035265:-:alternative2";
chr7H	PanBaRT20_trans_aveTPM10.gtf	exon	602720248	602720441	.	-	.	gene_id "A3:chr7H:602720441-602721190:602720348-602721190:-"; transcript_id "A3:chr7H:602720441-602721190:602720348-602721190:-:alternative1";
chr7H	PanBaRT20_trans_aveTPM10.gtf	exon	602721190	602721290	.	-	.	gene_id "A3:chr7H:602720441-602721190:602720348-602721190:-"; transcript_id "A3:chr7H:602720441-602721190:602720348-602721190:-:alternative1";
chr7H	PanBaRT20_trans_aveTPM10.gtf	exon	602720248	602720348	.	-	.	gene_id "A3:chr7H:602720441-602721190:602720348-602721190:-"; transcript_id "A3:chr7H:602720441-602721190:602720348-602721190:-:alternative2";
chr7H	PanBaRT20_trans_aveTPM10.gtf	exon	602721190	602721290	.	-	.	gene_id "A3:chr7H:602720441-602721190:602720348-602721190:-"; transcript_id "A3:chr7H:602720441-602721190:602720348-602721190:-:alternative2";
chr7H	PanBaRT20_trans_aveTPM10.gtf	exon	632026302	632026441	.	-	.	gene_id "A3:chr7H:632026441-632026587:632026402-632026587:-"; transcript_id "A3:chr7H:632026441-632026587:632026402-632026587:-:alternative1";
chr7H	PanBaRT20_trans_aveTPM10.gtf	exon	632026587	632026687	.	-	.	gene_id "A3:chr7H:632026441-632026587:632026402-632026587:-"; transcript_id "A3:chr7H:632026441-632026587:632026402-632026587:-:alternative1";
chr7H	PanBaRT20_trans_aveTPM10.gtf	exon	632026302	632026402	.	-	.	gene_id "A3:chr7H:632026441-632026587:632026402-632026587:-"; transcript_id "A3:chr7H:632026441-632026587:632026402-632026587:-:alternative2";
chr7H	PanBaRT20_trans_aveTPM10.gtf	exon	632026587	632026687	.	-	.	gene_id "A3:chr7H:632026441-632026587:632026402-632026587:-"; transcript_id "A3:chr7H:632026441-632026587:632026402-632026587:-:alternative2";
chr7H	PanBaRT20_trans_aveTPM10.gtf	exon	659930277	659930380	.	-	.	gene_id "A3:chr7H:659930380-659930474:659930377-659930474:-"; transcript_id "A3:chr7H:659930380-659930474:659930377-659930474:-:alternative1";
chr7H	PanBaRT20_trans_aveTPM10.gtf	exon	659930474	659930574	.	-	.	gene_id "A3:chr7H:659930380-659930474:659930377-659930474:-"; transcript_id "A3:chr7H:659930380-659930474:659930377-659930474:-:alternative1";
chr7H	PanBaRT20_trans_aveTPM10.gtf	exon	659930277	659930377	.	-	.	gene_id "A3:chr7H:659930380-659930474:659930377-659930474:-"; transcript_id "A3:chr7H:659930380-659930474:659930377-659930474:-:alternative2";
chr7H	PanBaRT20_trans_aveTPM10.gtf	exon	659930474	659930574	.	-	.	gene_id "A3:chr7H:659930380-659930474:659930377-659930474:-"; transcript_id "A3:chr7H:659930380-659930474:659930377-659930474:-:alternative2";
chr7H	PanBaRT20_trans_aveTPM10.gtf	exon	674196790	674196902	.	-	.	gene_id "A3:chr7H:674196902-674196977:674196890-674196977:-"; transcript_id "A3:chr7H:674196902-674196977:674196890-674196977:-:alternative1";
chr7H	PanBaRT20_trans_aveTPM10.gtf	exon	674196977	674197077	.	-	.	gene_id "A3:chr7H:674196902-674196977:674196890-674196977:-"; transcript_id "A3:chr7H:674196902-674196977:674196890-674196977:-:alternative1";
chr7H	PanBaRT20_trans_aveTPM10.gtf	exon	674196790	674196890	.	-	.	gene_id "A3:chr7H:674196902-674196977:674196890-674196977:-"; transcript_id "A3:chr7H:674196902-674196977:674196890-674196977:-:alternative2";
chr7H	PanBaRT20_trans_aveTPM10.gtf	exon	674196977	674197077	.	-	.	gene_id "A3:chr7H:674196902-674196977:674196890-674196977:-"; transcript_id "A3:chr7H:674196902-674196977:674196890-674196977:-:alternative2";
chr7H	PanBaRT20_trans_aveTPM10.gtf	exon	14596295	14596395	.	+	.	gene_id "A3:chr7H:14596395-14596490:14596395-14596493:+"; transcript_id "A3:chr7H:14596395-14596490:14596395-14596493:+:alternative1";
chr7H	PanBaRT20_trans_aveTPM10.gtf	exon	14596490	14596593	.	+	.	gene_id "A3:chr7H:14596395-14596490:14596395-14596493:+"; transcript_id "A3:chr7H:14596395-14596490:14596395-14596493:+:alternative1";
chr7H	PanBaRT20_trans_aveTPM10.gtf	exon	14596295	14596395	.	+	.	gene_id "A3:chr7H:14596395-14596490:14596395-14596493:+"; transcript_id "A3:chr7H:14596395-14596490:14596395-14596493:+:alternative2";
chr7H	PanBaRT20_trans_aveTPM10.gtf	exon	14596493	14596593	.	+	.	gene_id "A3:chr7H:14596395-14596490:14596395-14596493:+"; transcript_id "A3:chr7H:14596395-14596490:14596395-14596493:+:alternative2";
chr7H	PanBaRT20_trans_aveTPM10.gtf	exon	21371251	21371351	.	+	.	gene_id "A3:chr7H:21371351-21372094:21371351-21372110:+"; transcript_id "A3:chr7H:21371351-21372094:21371351-21372110:+:alternative1";
chr7H	PanBaRT20_trans_aveTPM10.gtf	exon	21372094	21372210	.	+	.	gene_id "A3:chr7H:21371351-21372094:21371351-21372110:+"; transcript_id "A3:chr7H:21371351-21372094:21371351-21372110:+:alternative1";
chr7H	PanBaRT20_trans_aveTPM10.gtf	exon	21371251	21371351	.	+	.	gene_id "A3:chr7H:21371351-21372094:21371351-21372110:+"; transcript_id "A3:chr7H:21371351-21372094:21371351-21372110:+:alternative2";
chr7H	PanBaRT20_trans_aveTPM10.gtf	exon	21372110	21372210	.	+	.	gene_id "A3:chr7H:21371351-21372094:21371351-21372110:+"; transcript_id "A3:chr7H:21371351-21372094:21371351-21372110:+:alternative2";
chr7H	PanBaRT20_trans_aveTPM10.gtf	exon	41413945	41414045	.	+	.	gene_id "A3:chr7H:41414045-41414782:41414045-41414791:+"; transcript_id "A3:chr7H:41414045-41414782:41414045-41414791:+:alternative1";
chr7H	PanBaRT20_trans_aveTPM10.gtf	exon	41414782	41414891	.	+	.	gene_id "A3:chr7H:41414045-41414782:41414045-41414791:+"; transcript_id "A3:chr7H:41414045-41414782:41414045-41414791:+:alternative1";
chr7H	PanBaRT20_trans_aveTPM10.gtf	exon	41413945	41414045	.	+	.	gene_id "A3:chr7H:41414045-41414782:41414045-41414791:+"; transcript_id "A3:chr7H:41414045-41414782:41414045-41414791:+:alternative2";
chr7H	PanBaRT20_trans_aveTPM10.gtf	exon	41414791	41414891	.	+	.	gene_id "A3:chr7H:41414045-41414782:41414045-41414791:+"; transcript_id "A3:chr7H:41414045-41414782:41414045-41414791:+:alternative2";
chr7H	PanBaRT20_trans_aveTPM10.gtf	exon	47814341	47814441	.	+	.	gene_id "A3:chr7H:47814441-47815162:47814441-47815166:+"; transcript_id "A3:chr7H:47814441-47815162:47814441-47815166:+:alternative1";
chr7H	PanBaRT20_trans_aveTPM10.gtf	exon	47815162	47815266	.	+	.	gene_id "A3:chr7H:47814441-47815162:47814441-47815166:+"; transcript_id "A3:chr7H:47814441-47815162:47814441-47815166:+:alternative1";
chr7H	PanBaRT20_trans_aveTPM10.gtf	exon	47814341	47814441	.	+	.	gene_id "A3:chr7H:47814441-47815162:47814441-47815166:+"; transcript_id "A3:chr7H:47814441-47815162:47814441-47815166:+:alternative2";
chr7H	PanBaRT20_trans_aveTPM10.gtf	exon	47815166	47815266	.	+	.	gene_id "A3:chr7H:47814441-47815162:47814441-47815166:+"; transcript_id "A3:chr7H:47814441-47815162:47814441-47815166:+:alternative2";
chr7H	PanBaRT20_trans_aveTPM10.gtf	exon	81954680	81954780	.	+	.	gene_id "A3:chr7H:81954780-81955210:81954780-81955214:+"; transcript_id "A3:chr7H:81954780-81955210:81954780-81955214:+:alternative1";
chr7H	PanBaRT20_trans_aveTPM10.gtf	exon	81955210	81955314	.	+	.	gene_id "A3:chr7H:81954780-81955210:81954780-81955214:+"; transcript_id "A3:chr7H:81954780-81955210:81954780-81955214:+:alternative1";
chr7H	PanBaRT20_trans_aveTPM10.gtf	exon	81954680	81954780	.	+	.	gene_id "A3:chr7H:81954780-81955210:81954780-81955214:+"; transcript_id "A3:chr7H:81954780-81955210:81954780-81955214:+:alternative2";
chr7H	PanBaRT20_trans_aveTPM10.gtf	exon	81955214	81955314	.	+	.	gene_id "A3:chr7H:81954780-81955210:81954780-81955214:+"; transcript_id "A3:chr7H:81954780-81955210:81954780-81955214:+:alternative2";
chr7H	PanBaRT20_trans_aveTPM10.gtf	exon	147240865	147240965	.	+	.	gene_id "A3:chr7H:147240965-147241569:147240965-147241584:+"; transcript_id "A3:chr7H:147240965-147241569:147240965-147241584:+:alternative1";
chr7H	PanBaRT20_trans_aveTPM10.gtf	exon	147241569	147241684	.	+	.	gene_id "A3:chr7H:147240965-147241569:147240965-147241584:+"; transcript_id "A3:chr7H:147240965-147241569:147240965-147241584:+:alternative1";
chr7H	PanBaRT20_trans_aveTPM10.gtf	exon	147240865	147240965	.	+	.	gene_id "A3:chr7H:147240965-147241569:147240965-147241584:+"; transcript_id "A3:chr7H:147240965-147241569:147240965-147241584:+:alternative2";
chr7H	PanBaRT20_trans_aveTPM10.gtf	exon	147241584	147241684	.	+	.	gene_id "A3:chr7H:147240965-147241569:147240965-147241584:+"; transcript_id "A3:chr7H:147240965-147241569:147240965-147241584:+:alternative2";
chr7H	PanBaRT20_trans_aveTPM10.gtf	exon	224241742	224241842	.	+	.	gene_id "A3:chr7H:224241842-224241913:224241842-224241916:+"; transcript_id "A3:chr7H:224241842-224241913:224241842-224241916:+:alternative1";
chr7H	PanBaRT20_trans_aveTPM10.gtf	exon	224241913	224242016	.	+	.	gene_id "A3:chr7H:224241842-224241913:224241842-224241916:+"; transcript_id "A3:chr7H:224241842-224241913:224241842-224241916:+:alternative1";
chr7H	PanBaRT20_trans_aveTPM10.gtf	exon	224241742	224241842	.	+	.	gene_id "A3:chr7H:224241842-224241913:224241842-224241916:+"; transcript_id "A3:chr7H:224241842-224241913:224241842-224241916:+:alternative2";
chr7H	PanBaRT20_trans_aveTPM10.gtf	exon	224241916	224242016	.	+	.	gene_id "A3:chr7H:224241842-224241913:224241842-224241916:+"; transcript_id "A3:chr7H:224241842-224241913:224241842-224241916:+:alternative2";
chr7H	PanBaRT20_trans_aveTPM10.gtf	exon	291315069	291315169	.	+	.	gene_id "A3:chr7H:291315169-291315693:291315169-291315696:+"; transcript_id "A3:chr7H:291315169-291315693:291315169-291315696:+:alternative1";
chr7H	PanBaRT20_trans_aveTPM10.gtf	exon	291315693	291315796	.	+	.	gene_id "A3:chr7H:291315169-291315693:291315169-291315696:+"; transcript_id "A3:chr7H:291315169-291315693:291315169-291315696:+:alternative1";
chr7H	PanBaRT20_trans_aveTPM10.gtf	exon	291315069	291315169	.	+	.	gene_id "A3:chr7H:291315169-291315693:291315169-291315696:+"; transcript_id "A3:chr7H:291315169-291315693:291315169-291315696:+:alternative2";
chr7H	PanBaRT20_trans_aveTPM10.gtf	exon	291315696	291315796	.	+	.	gene_id "A3:chr7H:291315169-291315693:291315169-291315696:+"; transcript_id "A3:chr7H:291315169-291315693:291315169-291315696:+:alternative2";
chr7H	PanBaRT20_trans_aveTPM10.gtf	exon	313714998	313715098	.	+	.	gene_id "A3:chr7H:313715098-313715238:313715098-313715269:+"; transcript_id "A3:chr7H:313715098-313715238:313715098-313715269:+:alternative1";
chr7H	PanBaRT20_trans_aveTPM10.gtf	exon	313715238	313715369	.	+	.	gene_id "A3:chr7H:313715098-313715238:313715098-313715269:+"; transcript_id "A3:chr7H:313715098-313715238:313715098-313715269:+:alternative1";
chr7H	PanBaRT20_trans_aveTPM10.gtf	exon	313714998	313715098	.	+	.	gene_id "A3:chr7H:313715098-313715238:313715098-313715269:+"; transcript_id "A3:chr7H:313715098-313715238:313715098-313715269:+:alternative2";
chr7H	PanBaRT20_trans_aveTPM10.gtf	exon	313715269	313715369	.	+	.	gene_id "A3:chr7H:313715098-313715238:313715098-313715269:+"; transcript_id "A3:chr7H:313715098-313715238:313715098-313715269:+:alternative2";
chr7H	PanBaRT20_trans_aveTPM10.gtf	exon	416740679	416740779	.	+	.	gene_id "A3:chr7H:416740779-416740965:416740779-416740975:+"; transcript_id "A3:chr7H:416740779-416740965:416740779-416740975:+:alternative1";
chr7H	PanBaRT20_trans_aveTPM10.gtf	exon	416740965	416741075	.	+	.	gene_id "A3:chr7H:416740779-416740965:416740779-416740975:+"; transcript_id "A3:chr7H:416740779-416740965:416740779-416740975:+:alternative1";
chr7H	PanBaRT20_trans_aveTPM10.gtf	exon	416740679	416740779	.	+	.	gene_id "A3:chr7H:416740779-416740965:416740779-416740975:+"; transcript_id "A3:chr7H:416740779-416740965:416740779-416740975:+:alternative2";
chr7H	PanBaRT20_trans_aveTPM10.gtf	exon	416740975	416741075	.	+	.	gene_id "A3:chr7H:416740779-416740965:416740779-416740975:+"; transcript_id "A3:chr7H:416740779-416740965:416740779-416740975:+:alternative2";
chr7H	PanBaRT20_trans_aveTPM10.gtf	exon	436613046	436613146	.	+	.	gene_id "A3:chr7H:436613146-436613219:436613146-436613227:+"; transcript_id "A3:chr7H:436613146-436613219:436613146-436613227:+:alternative1";
chr7H	PanBaRT20_trans_aveTPM10.gtf	exon	436613219	436613327	.	+	.	gene_id "A3:chr7H:436613146-436613219:436613146-436613227:+"; transcript_id "A3:chr7H:436613146-436613219:436613146-436613227:+:alternative1";
chr7H	PanBaRT20_trans_aveTPM10.gtf	exon	436613046	436613146	.	+	.	gene_id "A3:chr7H:436613146-436613219:436613146-436613227:+"; transcript_id "A3:chr7H:436613146-436613219:436613146-436613227:+:alternative2";
chr7H	PanBaRT20_trans_aveTPM10.gtf	exon	436613227	436613327	.	+	.	gene_id "A3:chr7H:436613146-436613219:436613146-436613227:+"; transcript_id "A3:chr7H:436613146-436613219:436613146-436613227:+:alternative2";
chr7H	PanBaRT20_trans_aveTPM10.gtf	exon	453507690	453507790	.	+	.	gene_id "A3:chr7H:453507790-453508714:453507790-453509701:+"; transcript_id "A3:chr7H:453507790-453508714:453507790-453509701:+:alternative1";
chr7H	PanBaRT20_trans_aveTPM10.gtf	exon	453508714	453509801	.	+	.	gene_id "A3:chr7H:453507790-453508714:453507790-453509701:+"; transcript_id "A3:chr7H:453507790-453508714:453507790-453509701:+:alternative1";
chr7H	PanBaRT20_trans_aveTPM10.gtf	exon	453507690	453507790	.	+	.	gene_id "A3:chr7H:453507790-453508714:453507790-453509701:+"; transcript_id "A3:chr7H:453507790-453508714:453507790-453509701:+:alternative2";
chr7H	PanBaRT20_trans_aveTPM10.gtf	exon	453509701	453509801	.	+	.	gene_id "A3:chr7H:453507790-453508714:453507790-453509701:+"; transcript_id "A3:chr7H:453507790-453508714:453507790-453509701:+:alternative2";
chr7H	PanBaRT20_trans_aveTPM10.gtf	exon	593998424	593998524	.	+	.	gene_id "A3:chr7H:593998524-594000219:593998524-594000767:+"; transcript_id "A3:chr7H:593998524-594000219:593998524-594000767:+:alternative1";
chr7H	PanBaRT20_trans_aveTPM10.gtf	exon	594000219	594000867	.	+	.	gene_id "A3:chr7H:593998524-594000219:593998524-594000767:+"; transcript_id "A3:chr7H:593998524-594000219:593998524-594000767:+:alternative1";
chr7H	PanBaRT20_trans_aveTPM10.gtf	exon	593998424	593998524	.	+	.	gene_id "A3:chr7H:593998524-594000219:593998524-594000767:+"; transcript_id "A3:chr7H:593998524-594000219:593998524-594000767:+:alternative2";
chr7H	PanBaRT20_trans_aveTPM10.gtf	exon	594000767	594000867	.	+	.	gene_id "A3:chr7H:593998524-594000219:593998524-594000767:+"; transcript_id "A3:chr7H:593998524-594000219:593998524-594000767:+:alternative2";
chr7H	PanBaRT20_trans_aveTPM10.gtf	exon	595262772	595262872	.	+	.	gene_id "A3:chr7H:595262872-595263052:595262872-595263055:+"; transcript_id "A3:chr7H:595262872-595263052:595262872-595263055:+:alternative1";
chr7H	PanBaRT20_trans_aveTPM10.gtf	exon	595263052	595263155	.	+	.	gene_id "A3:chr7H:595262872-595263052:595262872-595263055:+"; transcript_id "A3:chr7H:595262872-595263052:595262872-595263055:+:alternative1";
chr7H	PanBaRT20_trans_aveTPM10.gtf	exon	595262772	595262872	.	+	.	gene_id "A3:chr7H:595262872-595263052:595262872-595263055:+"; transcript_id "A3:chr7H:595262872-595263052:595262872-595263055:+:alternative2";
chr7H	PanBaRT20_trans_aveTPM10.gtf	exon	595263055	595263155	.	+	.	gene_id "A3:chr7H:595262872-595263052:595262872-595263055:+"; transcript_id "A3:chr7H:595262872-595263052:595262872-595263055:+:alternative2";
chr7H	PanBaRT20_trans_aveTPM10.gtf	exon	595265278	595265378	.	+	.	gene_id "A3:chr7H:595265378-595265660:595265378-595265663:+"; transcript_id "A3:chr7H:595265378-595265660:595265378-595265663:+:alternative1";
chr7H	PanBaRT20_trans_aveTPM10.gtf	exon	595265660	595265763	.	+	.	gene_id "A3:chr7H:595265378-595265660:595265378-595265663:+"; transcript_id "A3:chr7H:595265378-595265660:595265378-595265663:+:alternative1";
chr7H	PanBaRT20_trans_aveTPM10.gtf	exon	595265278	595265378	.	+	.	gene_id "A3:chr7H:595265378-595265660:595265378-595265663:+"; transcript_id "A3:chr7H:595265378-595265660:595265378-595265663:+:alternative2";
chr7H	PanBaRT20_trans_aveTPM10.gtf	exon	595265663	595265763	.	+	.	gene_id "A3:chr7H:595265378-595265660:595265378-595265663:+"; transcript_id "A3:chr7H:595265378-595265660:595265378-595265663:+:alternative2";
chr7H	PanBaRT20_trans_aveTPM10.gtf	exon	669768830	669768930	.	+	.	gene_id "A3:chr7H:669768930-669769026:669768930-669769029:+"; transcript_id "A3:chr7H:669768930-669769026:669768930-669769029:+:alternative1";
chr7H	PanBaRT20_trans_aveTPM10.gtf	exon	669769026	669769129	.	+	.	gene_id "A3:chr7H:669768930-669769026:669768930-669769029:+"; transcript_id "A3:chr7H:669768930-669769026:669768930-669769029:+:alternative1";
chr7H	PanBaRT20_trans_aveTPM10.gtf	exon	669768830	669768930	.	+	.	gene_id "A3:chr7H:669768930-669769026:669768930-669769029:+"; transcript_id "A3:chr7H:669768930-669769026:669768930-669769029:+:alternative2";
chr7H	PanBaRT20_trans_aveTPM10.gtf	exon	669769029	669769129	.	+	.	gene_id "A3:chr7H:669768930-669769026:669768930-669769029:+"; transcript_id "A3:chr7H:669768930-669769026:669768930-669769029:+:alternative2";
chr1H	PanBaRT20_trans_aveTPM10.gtf	exon	3219493	3219650	.	+	.	gene_id "A5:chr1H:3219650-3219729:3219593-3219729:+"; transcript_id "A5:chr1H:3219650-3219729:3219593-3219729:+:alternative1";
chr1H	PanBaRT20_trans_aveTPM10.gtf	exon	3219729	3219829	.	+	.	gene_id "A5:chr1H:3219650-3219729:3219593-3219729:+"; transcript_id "A5:chr1H:3219650-3219729:3219593-3219729:+:alternative1";
chr1H	PanBaRT20_trans_aveTPM10.gtf	exon	3219493	3219593	.	+	.	gene_id "A5:chr1H:3219650-3219729:3219593-3219729:+"; transcript_id "A5:chr1H:3219650-3219729:3219593-3219729:+:alternative2";
chr1H	PanBaRT20_trans_aveTPM10.gtf	exon	3219729	3219829	.	+	.	gene_id "A5:chr1H:3219650-3219729:3219593-3219729:+"; transcript_id "A5:chr1H:3219650-3219729:3219593-3219729:+:alternative2";
chr1H	PanBaRT20_trans_aveTPM10.gtf	exon	3466830	3466931	.	+	.	gene_id "A5:chr1H:3466931-3477743:3466930-3477743:+"; transcript_id "A5:chr1H:3466931-3477743:3466930-3477743:+:alternative1";
chr1H	PanBaRT20_trans_aveTPM10.gtf	exon	3477743	3477843	.	+	.	gene_id "A5:chr1H:3466931-3477743:3466930-3477743:+"; transcript_id "A5:chr1H:3466931-3477743:3466930-3477743:+:alternative1";
chr1H	PanBaRT20_trans_aveTPM10.gtf	exon	3466830	3466930	.	+	.	gene_id "A5:chr1H:3466931-3477743:3466930-3477743:+"; transcript_id "A5:chr1H:3466931-3477743:3466930-3477743:+:alternative2";
chr1H	PanBaRT20_trans_aveTPM10.gtf	exon	3477743	3477843	.	+	.	gene_id "A5:chr1H:3466931-3477743:3466930-3477743:+"; transcript_id "A5:chr1H:3466931-3477743:3466930-3477743:+:alternative2";
chr1H	PanBaRT20_trans_aveTPM10.gtf	exon	9978311	9978415	.	+	.	gene_id "A5:chr1H:9978415-9979063:9978411-9979063:+"; transcript_id "A5:chr1H:9978415-9979063:9978411-9979063:+:alternative1";
chr1H	PanBaRT20_trans_aveTPM10.gtf	exon	9979063	9979163	.	+	.	gene_id "A5:chr1H:9978415-9979063:9978411-9979063:+"; transcript_id "A5:chr1H:9978415-9979063:9978411-9979063:+:alternative1";
chr1H	PanBaRT20_trans_aveTPM10.gtf	exon	9978311	9978411	.	+	.	gene_id "A5:chr1H:9978415-9979063:9978411-9979063:+"; transcript_id "A5:chr1H:9978415-9979063:9978411-9979063:+:alternative2";
chr1H	PanBaRT20_trans_aveTPM10.gtf	exon	9979063	9979163	.	+	.	gene_id "A5:chr1H:9978415-9979063:9978411-9979063:+"; transcript_id "A5:chr1H:9978415-9979063:9978411-9979063:+:alternative2";
chr1H	PanBaRT20_trans_aveTPM10.gtf	exon	10852675	10852798	.	+	.	gene_id "A5:chr1H:10852798-10852937:10852775-10852937:+"; transcript_id "A5:chr1H:10852798-10852937:10852775-10852937:+:alternative1";
chr1H	PanBaRT20_trans_aveTPM10.gtf	exon	10852937	10853037	.	+	.	gene_id "A5:chr1H:10852798-10852937:10852775-10852937:+"; transcript_id "A5:chr1H:10852798-10852937:10852775-10852937:+:alternative1";
chr1H	PanBaRT20_trans_aveTPM10.gtf	exon	10852675	10852775	.	+	.	gene_id "A5:chr1H:10852798-10852937:10852775-10852937:+"; transcript_id "A5:chr1H:10852798-10852937:10852775-10852937:+:alternative2";
chr1H	PanBaRT20_trans_aveTPM10.gtf	exon	10852937	10853037	.	+	.	gene_id "A5:chr1H:10852798-10852937:10852775-10852937:+"; transcript_id "A5:chr1H:10852798-10852937:10852775-10852937:+:alternative2";
chr1H	PanBaRT20_trans_aveTPM10.gtf	exon	375578571	375578716	.	+	.	gene_id "A5:chr1H:375578716-375581162:375578671-375581162:+"; transcript_id "A5:chr1H:375578716-375581162:375578671-375581162:+:alternative1";
chr1H	PanBaRT20_trans_aveTPM10.gtf	exon	375581162	375581262	.	+	.	gene_id "A5:chr1H:375578716-375581162:375578671-375581162:+"; transcript_id "A5:chr1H:375578716-375581162:375578671-375581162:+:alternative1";
chr1H	PanBaRT20_trans_aveTPM10.gtf	exon	375578571	375578671	.	+	.	gene_id "A5:chr1H:375578716-375581162:375578671-375581162:+"; transcript_id "A5:chr1H:375578716-375581162:375578671-375581162:+:alternative2";
chr1H	PanBaRT20_trans_aveTPM10.gtf	exon	375581162	375581262	.	+	.	gene_id "A5:chr1H:375578716-375581162:375578671-375581162:+"; transcript_id "A5:chr1H:375578716-375581162:375578671-375581162:+:alternative2";
chr1H	PanBaRT20_trans_aveTPM10.gtf	exon	470694241	470694371	.	+	.	gene_id "A5:chr1H:470694371-470694431:470694341-470694431:+"; transcript_id "A5:chr1H:470694371-470694431:470694341-470694431:+:alternative1";
chr1H	PanBaRT20_trans_aveTPM10.gtf	exon	470694431	470694531	.	+	.	gene_id "A5:chr1H:470694371-470694431:470694341-470694431:+"; transcript_id "A5:chr1H:470694371-470694431:470694341-470694431:+:alternative1";
chr1H	PanBaRT20_trans_aveTPM10.gtf	exon	470694241	470694341	.	+	.	gene_id "A5:chr1H:470694371-470694431:470694341-470694431:+"; transcript_id "A5:chr1H:470694371-470694431:470694341-470694431:+:alternative2";
chr1H	PanBaRT20_trans_aveTPM10.gtf	exon	470694431	470694531	.	+	.	gene_id "A5:chr1H:470694371-470694431:470694341-470694431:+"; transcript_id "A5:chr1H:470694371-470694431:470694341-470694431:+:alternative2";
chr1H	PanBaRT20_trans_aveTPM10.gtf	exon	480219254	480219365	.	+	.	gene_id "A5:chr1H:480219365-480219694:480219354-480219694:+"; transcript_id "A5:chr1H:480219365-480219694:480219354-480219694:+:alternative1";
chr1H	PanBaRT20_trans_aveTPM10.gtf	exon	480219694	480219794	.	+	.	gene_id "A5:chr1H:480219365-480219694:480219354-480219694:+"; transcript_id "A5:chr1H:480219365-480219694:480219354-480219694:+:alternative1";
chr1H	PanBaRT20_trans_aveTPM10.gtf	exon	480219254	480219354	.	+	.	gene_id "A5:chr1H:480219365-480219694:480219354-480219694:+"; transcript_id "A5:chr1H:480219365-480219694:480219354-480219694:+:alternative2";
chr1H	PanBaRT20_trans_aveTPM10.gtf	exon	480219694	480219794	.	+	.	gene_id "A5:chr1H:480219365-480219694:480219354-480219694:+"; transcript_id "A5:chr1H:480219365-480219694:480219354-480219694:+:alternative2";
chr1H	PanBaRT20_trans_aveTPM10.gtf	exon	480714730	480714863	.	+	.	gene_id "A5:chr1H:480714863-480715978:480714830-480715978:+"; transcript_id "A5:chr1H:480714863-480715978:480714830-480715978:+:alternative1";
chr1H	PanBaRT20_trans_aveTPM10.gtf	exon	480715978	480716078	.	+	.	gene_id "A5:chr1H:480714863-480715978:480714830-480715978:+"; transcript_id "A5:chr1H:480714863-480715978:480714830-480715978:+:alternative1";
chr1H	PanBaRT20_trans_aveTPM10.gtf	exon	480714730	480714830	.	+	.	gene_id "A5:chr1H:480714863-480715978:480714830-480715978:+"; transcript_id "A5:chr1H:480714863-480715978:480714830-480715978:+:alternative2";
chr1H	PanBaRT20_trans_aveTPM10.gtf	exon	480715978	480716078	.	+	.	gene_id "A5:chr1H:480714863-480715978:480714830-480715978:+"; transcript_id "A5:chr1H:480714863-480715978:480714830-480715978:+:alternative2";
chr1H	PanBaRT20_trans_aveTPM10.gtf	exon	520209235	520209347	.	+	.	gene_id "A5:chr1H:520209347-520210342:520209335-520210342:+"; transcript_id "A5:chr1H:520209347-520210342:520209335-520210342:+:alternative1";
chr1H	PanBaRT20_trans_aveTPM10.gtf	exon	520210342	520210442	.	+	.	gene_id "A5:chr1H:520209347-520210342:520209335-520210342:+"; transcript_id "A5:chr1H:520209347-520210342:520209335-520210342:+:alternative1";
chr1H	PanBaRT20_trans_aveTPM10.gtf	exon	520209235	520209335	.	+	.	gene_id "A5:chr1H:520209347-520210342:520209335-520210342:+"; transcript_id "A5:chr1H:520209347-520210342:520209335-520210342:+:alternative2";
chr1H	PanBaRT20_trans_aveTPM10.gtf	exon	520210342	520210442	.	+	.	gene_id "A5:chr1H:520209347-520210342:520209335-520210342:+"; transcript_id "A5:chr1H:520209347-520210342:520209335-520210342:+:alternative2";
chr1H	PanBaRT20_trans_aveTPM10.gtf	exon	521466953	521467056	.	+	.	gene_id "A5:chr1H:521467056-521467128:521467053-521467128:+"; transcript_id "A5:chr1H:521467056-521467128:521467053-521467128:+:alternative1";
chr1H	PanBaRT20_trans_aveTPM10.gtf	exon	521467128	521467228	.	+	.	gene_id "A5:chr1H:521467056-521467128:521467053-521467128:+"; transcript_id "A5:chr1H:521467056-521467128:521467053-521467128:+:alternative1";
chr1H	PanBaRT20_trans_aveTPM10.gtf	exon	521466953	521467053	.	+	.	gene_id "A5:chr1H:521467056-521467128:521467053-521467128:+"; transcript_id "A5:chr1H:521467056-521467128:521467053-521467128:+:alternative2";
chr1H	PanBaRT20_trans_aveTPM10.gtf	exon	521467128	521467228	.	+	.	gene_id "A5:chr1H:521467056-521467128:521467053-521467128:+"; transcript_id "A5:chr1H:521467056-521467128:521467053-521467128:+:alternative2";
chr1H	PanBaRT20_trans_aveTPM10.gtf	exon	6105781	6105881	.	-	.	gene_id "A5:chr1H:6105881-6108432:6105881-6108711:-"; transcript_id "A5:chr1H:6105881-6108432:6105881-6108711:-:alternative1";
chr1H	PanBaRT20_trans_aveTPM10.gtf	exon	6108432	6108811	.	-	.	gene_id "A5:chr1H:6105881-6108432:6105881-6108711:-"; transcript_id "A5:chr1H:6105881-6108432:6105881-6108711:-:alternative1";
chr1H	PanBaRT20_trans_aveTPM10.gtf	exon	6105781	6105881	.	-	.	gene_id "A5:chr1H:6105881-6108432:6105881-6108711:-"; transcript_id "A5:chr1H:6105881-6108432:6105881-6108711:-:alternative2";
chr1H	PanBaRT20_trans_aveTPM10.gtf	exon	6108711	6108811	.	-	.	gene_id "A5:chr1H:6105881-6108432:6105881-6108711:-"; transcript_id "A5:chr1H:6105881-6108432:6105881-6108711:-:alternative2";
chr1H	PanBaRT20_trans_aveTPM10.gtf	exon	136354022	136354122	.	-	.	gene_id "A5:chr1H:136354122-136354211:136354122-136354215:-"; transcript_id "A5:chr1H:136354122-136354211:136354122-136354215:-:alternative1";
chr1H	PanBaRT20_trans_aveTPM10.gtf	exon	136354211	136354315	.	-	.	gene_id "A5:chr1H:136354122-136354211:136354122-136354215:-"; transcript_id "A5:chr1H:136354122-136354211:136354122-136354215:-:alternative1";
chr1H	PanBaRT20_trans_aveTPM10.gtf	exon	136354022	136354122	.	-	.	gene_id "A5:chr1H:136354122-136354211:136354122-136354215:-"; transcript_id "A5:chr1H:136354122-136354211:136354122-136354215:-:alternative2";
chr1H	PanBaRT20_trans_aveTPM10.gtf	exon	136354215	136354315	.	-	.	gene_id "A5:chr1H:136354122-136354211:136354122-136354215:-"; transcript_id "A5:chr1H:136354122-136354211:136354122-136354215:-:alternative2";
chr1H	PanBaRT20_trans_aveTPM10.gtf	exon	181592986	181593086	.	-	.	gene_id "A5:chr1H:181593086-181593256:181593086-181595249:-"; transcript_id "A5:chr1H:181593086-181593256:181593086-181595249:-:alternative1";
chr1H	PanBaRT20_trans_aveTPM10.gtf	exon	181593256	181595349	.	-	.	gene_id "A5:chr1H:181593086-181593256:181593086-181595249:-"; transcript_id "A5:chr1H:181593086-181593256:181593086-181595249:-:alternative1";
chr1H	PanBaRT20_trans_aveTPM10.gtf	exon	181592986	181593086	.	-	.	gene_id "A5:chr1H:181593086-181593256:181593086-181595249:-"; transcript_id "A5:chr1H:181593086-181593256:181593086-181595249:-:alternative2";
chr1H	PanBaRT20_trans_aveTPM10.gtf	exon	181595249	181595349	.	-	.	gene_id "A5:chr1H:181593086-181593256:181593086-181595249:-"; transcript_id "A5:chr1H:181593086-181593256:181593086-181595249:-:alternative2";
chr1H	PanBaRT20_trans_aveTPM10.gtf	exon	343847400	343847500	.	-	.	gene_id "A5:chr1H:343847500-343847666:343847500-343849105:-"; transcript_id "A5:chr1H:343847500-343847666:343847500-343849105:-:alternative1";
chr1H	PanBaRT20_trans_aveTPM10.gtf	exon	343847666	343849205	.	-	.	gene_id "A5:chr1H:343847500-343847666:343847500-343849105:-"; transcript_id "A5:chr1H:343847500-343847666:343847500-343849105:-:alternative1";
chr1H	PanBaRT20_trans_aveTPM10.gtf	exon	343847400	343847500	.	-	.	gene_id "A5:chr1H:343847500-343847666:343847500-343849105:-"; transcript_id "A5:chr1H:343847500-343847666:343847500-343849105:-:alternative2";
chr1H	PanBaRT20_trans_aveTPM10.gtf	exon	343849105	343849205	.	-	.	gene_id "A5:chr1H:343847500-343847666:343847500-343849105:-"; transcript_id "A5:chr1H:343847500-343847666:343847500-343849105:-:alternative2";
chr1H	PanBaRT20_trans_aveTPM10.gtf	exon	399835348	399835448	.	-	.	gene_id "A5:chr1H:399835448-399835538:399835448-399835562:-"; transcript_id "A5:chr1H:399835448-399835538:399835448-399835562:-:alternative1";
chr1H	PanBaRT20_trans_aveTPM10.gtf	exon	399835538	399835662	.	-	.	gene_id "A5:chr1H:399835448-399835538:399835448-399835562:-"; transcript_id "A5:chr1H:399835448-399835538:399835448-399835562:-:alternative1";
chr1H	PanBaRT20_trans_aveTPM10.gtf	exon	399835348	399835448	.	-	.	gene_id "A5:chr1H:399835448-399835538:399835448-399835562:-"; transcript_id "A5:chr1H:399835448-399835538:399835448-399835562:-:alternative2";
chr1H	PanBaRT20_trans_aveTPM10.gtf	exon	399835562	399835662	.	-	.	gene_id "A5:chr1H:399835448-399835538:399835448-399835562:-"; transcript_id "A5:chr1H:399835448-399835538:399835448-399835562:-:alternative2";
chr1H	PanBaRT20_trans_aveTPM10.gtf	exon	494458239	494458339	.	-	.	gene_id "A5:chr1H:494458339-494458463:494458339-494458469:-"; transcript_id "A5:chr1H:494458339-494458463:494458339-494458469:-:alternative1";
chr1H	PanBaRT20_trans_aveTPM10.gtf	exon	494458463	494458569	.	-	.	gene_id "A5:chr1H:494458339-494458463:494458339-494458469:-"; transcript_id "A5:chr1H:494458339-494458463:494458339-494458469:-:alternative1";
chr1H	PanBaRT20_trans_aveTPM10.gtf	exon	494458239	494458339	.	-	.	gene_id "A5:chr1H:494458339-494458463:494458339-494458469:-"; transcript_id "A5:chr1H:494458339-494458463:494458339-494458469:-:alternative2";
chr1H	PanBaRT20_trans_aveTPM10.gtf	exon	494458469	494458569	.	-	.	gene_id "A5:chr1H:494458339-494458463:494458339-494458469:-"; transcript_id "A5:chr1H:494458339-494458463:494458339-494458469:-:alternative2";
chr1H	PanBaRT20_trans_aveTPM10.gtf	exon	499658820	499658920	.	-	.	gene_id "A5:chr1H:499658920-499659016:499658920-499659117:-"; transcript_id "A5:chr1H:499658920-499659016:499658920-499659117:-:alternative1";
chr1H	PanBaRT20_trans_aveTPM10.gtf	exon	499659016	499659217	.	-	.	gene_id "A5:chr1H:499658920-499659016:499658920-499659117:-"; transcript_id "A5:chr1H:499658920-499659016:499658920-499659117:-:alternative1";
chr1H	PanBaRT20_trans_aveTPM10.gtf	exon	499658820	499658920	.	-	.	gene_id "A5:chr1H:499658920-499659016:499658920-499659117:-"; transcript_id "A5:chr1H:499658920-499659016:499658920-499659117:-:alternative2";
chr1H	PanBaRT20_trans_aveTPM10.gtf	exon	499659117	499659217	.	-	.	gene_id "A5:chr1H:499658920-499659016:499658920-499659117:-"; transcript_id "A5:chr1H:499658920-499659016:499658920-499659117:-:alternative2";
chr1H	PanBaRT20_trans_aveTPM10.gtf	exon	557752836	557752936	.	-	.	gene_id "A5:chr1H:557752936-557754715:557752936-557754719:-"; transcript_id "A5:chr1H:557752936-557754715:557752936-557754719:-:alternative1";
chr1H	PanBaRT20_trans_aveTPM10.gtf	exon	557754715	557754819	.	-	.	gene_id "A5:chr1H:557752936-557754715:557752936-557754719:-"; transcript_id "A5:chr1H:557752936-557754715:557752936-557754719:-:alternative1";
chr1H	PanBaRT20_trans_aveTPM10.gtf	exon	557752836	557752936	.	-	.	gene_id "A5:chr1H:557752936-557754715:557752936-557754719:-"; transcript_id "A5:chr1H:557752936-557754715:557752936-557754719:-:alternative2";
chr1H	PanBaRT20_trans_aveTPM10.gtf	exon	557754719	557754819	.	-	.	gene_id "A5:chr1H:557752936-557754715:557752936-557754719:-"; transcript_id "A5:chr1H:557752936-557754715:557752936-557754719:-:alternative2";
chr2H	PanBaRT20_trans_aveTPM10.gtf	exon	320192573	320192673	.	-	.	gene_id "A5:chr2H:320192673-320192769:320192673-320192780:-"; transcript_id "A5:chr2H:320192673-320192769:320192673-320192780:-:alternative1";
chr2H	PanBaRT20_trans_aveTPM10.gtf	exon	320192769	320192880	.	-	.	gene_id "A5:chr2H:320192673-320192769:320192673-320192780:-"; transcript_id "A5:chr2H:320192673-320192769:320192673-320192780:-:alternative1";
chr2H	PanBaRT20_trans_aveTPM10.gtf	exon	320192573	320192673	.	-	.	gene_id "A5:chr2H:320192673-320192769:320192673-320192780:-"; transcript_id "A5:chr2H:320192673-320192769:320192673-320192780:-:alternative2";
chr2H	PanBaRT20_trans_aveTPM10.gtf	exon	320192780	320192880	.	-	.	gene_id "A5:chr2H:320192673-320192769:320192673-320192780:-"; transcript_id "A5:chr2H:320192673-320192769:320192673-320192780:-:alternative2";
chr2H	PanBaRT20_trans_aveTPM10.gtf	exon	566313472	566313572	.	-	.	gene_id "A5:chr2H:566313572-566313666:566313572-566313696:-"; transcript_id "A5:chr2H:566313572-566313666:566313572-566313696:-:alternative1";
chr2H	PanBaRT20_trans_aveTPM10.gtf	exon	566313666	566313796	.	-	.	gene_id "A5:chr2H:566313572-566313666:566313572-566313696:-"; transcript_id "A5:chr2H:566313572-566313666:566313572-566313696:-:alternative1";
chr2H	PanBaRT20_trans_aveTPM10.gtf	exon	566313472	566313572	.	-	.	gene_id "A5:chr2H:566313572-566313666:566313572-566313696:-"; transcript_id "A5:chr2H:566313572-566313666:566313572-566313696:-:alternative2";
chr2H	PanBaRT20_trans_aveTPM10.gtf	exon	566313696	566313796	.	-	.	gene_id "A5:chr2H:566313572-566313666:566313572-566313696:-"; transcript_id "A5:chr2H:566313572-566313666:566313572-566313696:-:alternative2";
chr2H	PanBaRT20_trans_aveTPM10.gtf	exon	589780771	589780871	.	-	.	gene_id "A5:chr2H:589780871-589781505:589780871-589781510:-"; transcript_id "A5:chr2H:589780871-589781505:589780871-589781510:-:alternative1";
chr2H	PanBaRT20_trans_aveTPM10.gtf	exon	589781505	589781610	.	-	.	gene_id "A5:chr2H:589780871-589781505:589780871-589781510:-"; transcript_id "A5:chr2H:589780871-589781505:589780871-589781510:-:alternative1";
chr2H	PanBaRT20_trans_aveTPM10.gtf	exon	589780771	589780871	.	-	.	gene_id "A5:chr2H:589780871-589781505:589780871-589781510:-"; transcript_id "A5:chr2H:589780871-589781505:589780871-589781510:-:alternative2";
chr2H	PanBaRT20_trans_aveTPM10.gtf	exon	589781510	589781610	.	-	.	gene_id "A5:chr2H:589780871-589781505:589780871-589781510:-"; transcript_id "A5:chr2H:589780871-589781505:589780871-589781510:-:alternative2";
chr2H	PanBaRT20_trans_aveTPM10.gtf	exon	688921537	688921637	.	-	.	gene_id "A5:chr2H:688921637-688922601:688921637-688922897:-"; transcript_id "A5:chr2H:688921637-688922601:688921637-688922897:-:alternative1";
chr2H	PanBaRT20_trans_aveTPM10.gtf	exon	688922601	688922997	.	-	.	gene_id "A5:chr2H:688921637-688922601:688921637-688922897:-"; transcript_id "A5:chr2H:688921637-688922601:688921637-688922897:-:alternative1";
chr2H	PanBaRT20_trans_aveTPM10.gtf	exon	688921537	688921637	.	-	.	gene_id "A5:chr2H:688921637-688922601:688921637-688922897:-"; transcript_id "A5:chr2H:688921637-688922601:688921637-688922897:-:alternative2";
chr2H	PanBaRT20_trans_aveTPM10.gtf	exon	688922897	688922997	.	-	.	gene_id "A5:chr2H:688921637-688922601:688921637-688922897:-"; transcript_id "A5:chr2H:688921637-688922601:688921637-688922897:-:alternative2";
chr2H	PanBaRT20_trans_aveTPM10.gtf	exon	3177812	3177928	.	+	.	gene_id "A5:chr2H:3177928-3179091:3177912-3179091:+"; transcript_id "A5:chr2H:3177928-3179091:3177912-3179091:+:alternative1";
chr2H	PanBaRT20_trans_aveTPM10.gtf	exon	3179091	3179191	.	+	.	gene_id "A5:chr2H:3177928-3179091:3177912-3179091:+"; transcript_id "A5:chr2H:3177928-3179091:3177912-3179091:+:alternative1";
chr2H	PanBaRT20_trans_aveTPM10.gtf	exon	3177812	3177912	.	+	.	gene_id "A5:chr2H:3177928-3179091:3177912-3179091:+"; transcript_id "A5:chr2H:3177928-3179091:3177912-3179091:+:alternative2";
chr2H	PanBaRT20_trans_aveTPM10.gtf	exon	3179091	3179191	.	+	.	gene_id "A5:chr2H:3177928-3179091:3177912-3179091:+"; transcript_id "A5:chr2H:3177928-3179091:3177912-3179091:+:alternative2";
chr2H	PanBaRT20_trans_aveTPM10.gtf	exon	11631713	11631854	.	+	.	gene_id "A5:chr2H:11631854-11632726:11631813-11632726:+"; transcript_id "A5:chr2H:11631854-11632726:11631813-11632726:+:alternative1";
chr2H	PanBaRT20_trans_aveTPM10.gtf	exon	11632726	11632826	.	+	.	gene_id "A5:chr2H:11631854-11632726:11631813-11632726:+"; transcript_id "A5:chr2H:11631854-11632726:11631813-11632726:+:alternative1";
chr2H	PanBaRT20_trans_aveTPM10.gtf	exon	11631713	11631813	.	+	.	gene_id "A5:chr2H:11631854-11632726:11631813-11632726:+"; transcript_id "A5:chr2H:11631854-11632726:11631813-11632726:+:alternative2";
chr2H	PanBaRT20_trans_aveTPM10.gtf	exon	11632726	11632826	.	+	.	gene_id "A5:chr2H:11631854-11632726:11631813-11632726:+"; transcript_id "A5:chr2H:11631854-11632726:11631813-11632726:+:alternative2";
chr2H	PanBaRT20_trans_aveTPM10.gtf	exon	11632740	11632856	.	+	.	gene_id "A5:chr2H:11632856-11632945:11632840-11632945:+"; transcript_id "A5:chr2H:11632856-11632945:11632840-11632945:+:alternative1";
chr2H	PanBaRT20_trans_aveTPM10.gtf	exon	11632945	11633045	.	+	.	gene_id "A5:chr2H:11632856-11632945:11632840-11632945:+"; transcript_id "A5:chr2H:11632856-11632945:11632840-11632945:+:alternative1";
chr2H	PanBaRT20_trans_aveTPM10.gtf	exon	11632740	11632840	.	+	.	gene_id "A5:chr2H:11632856-11632945:11632840-11632945:+"; transcript_id "A5:chr2H:11632856-11632945:11632840-11632945:+:alternative2";
chr2H	PanBaRT20_trans_aveTPM10.gtf	exon	11632945	11633045	.	+	.	gene_id "A5:chr2H:11632856-11632945:11632840-11632945:+"; transcript_id "A5:chr2H:11632856-11632945:11632840-11632945:+:alternative2";
chr2H	PanBaRT20_trans_aveTPM10.gtf	exon	31666668	31666876	.	+	.	gene_id "A5:chr2H:31666876-31667838:31666768-31667838:+"; transcript_id "A5:chr2H:31666876-31667838:31666768-31667838:+:alternative1";
chr2H	PanBaRT20_trans_aveTPM10.gtf	exon	31667838	31667938	.	+	.	gene_id "A5:chr2H:31666876-31667838:31666768-31667838:+"; transcript_id "A5:chr2H:31666876-31667838:31666768-31667838:+:alternative1";
chr2H	PanBaRT20_trans_aveTPM10.gtf	exon	31666668	31666768	.	+	.	gene_id "A5:chr2H:31666876-31667838:31666768-31667838:+"; transcript_id "A5:chr2H:31666876-31667838:31666768-31667838:+:alternative2";
chr2H	PanBaRT20_trans_aveTPM10.gtf	exon	31667838	31667938	.	+	.	gene_id "A5:chr2H:31666876-31667838:31666768-31667838:+"; transcript_id "A5:chr2H:31666876-31667838:31666768-31667838:+:alternative2";
chr2H	PanBaRT20_trans_aveTPM10.gtf	exon	61611196	61611300	.	+	.	gene_id "A5:chr2H:61611300-61611973:61611296-61611973:+"; transcript_id "A5:chr2H:61611300-61611973:61611296-61611973:+:alternative1";
chr2H	PanBaRT20_trans_aveTPM10.gtf	exon	61611973	61612073	.	+	.	gene_id "A5:chr2H:61611300-61611973:61611296-61611973:+"; transcript_id "A5:chr2H:61611300-61611973:61611296-61611973:+:alternative1";
chr2H	PanBaRT20_trans_aveTPM10.gtf	exon	61611196	61611296	.	+	.	gene_id "A5:chr2H:61611300-61611973:61611296-61611973:+"; transcript_id "A5:chr2H:61611300-61611973:61611296-61611973:+:alternative2";
chr2H	PanBaRT20_trans_aveTPM10.gtf	exon	61611973	61612073	.	+	.	gene_id "A5:chr2H:61611300-61611973:61611296-61611973:+"; transcript_id "A5:chr2H:61611300-61611973:61611296-61611973:+:alternative2";
chr2H	PanBaRT20_trans_aveTPM10.gtf	exon	114767192	114767297	.	+	.	gene_id "A5:chr2H:114767297-114769394:114767292-114769394:+"; transcript_id "A5:chr2H:114767297-114769394:114767292-114769394:+:alternative1";
chr2H	PanBaRT20_trans_aveTPM10.gtf	exon	114769394	114769494	.	+	.	gene_id "A5:chr2H:114767297-114769394:114767292-114769394:+"; transcript_id "A5:chr2H:114767297-114769394:114767292-114769394:+:alternative1";
chr2H	PanBaRT20_trans_aveTPM10.gtf	exon	114767192	114767292	.	+	.	gene_id "A5:chr2H:114767297-114769394:114767292-114769394:+"; transcript_id "A5:chr2H:114767297-114769394:114767292-114769394:+:alternative2";
chr2H	PanBaRT20_trans_aveTPM10.gtf	exon	114769394	114769494	.	+	.	gene_id "A5:chr2H:114767297-114769394:114767292-114769394:+"; transcript_id "A5:chr2H:114767297-114769394:114767292-114769394:+:alternative2";
chr2H	PanBaRT20_trans_aveTPM10.gtf	exon	120675777	120675905	.	+	.	gene_id "A5:chr2H:120675905-120676007:120675877-120676007:+"; transcript_id "A5:chr2H:120675905-120676007:120675877-120676007:+:alternative1";
chr2H	PanBaRT20_trans_aveTPM10.gtf	exon	120676007	120676107	.	+	.	gene_id "A5:chr2H:120675905-120676007:120675877-120676007:+"; transcript_id "A5:chr2H:120675905-120676007:120675877-120676007:+:alternative1";
chr2H	PanBaRT20_trans_aveTPM10.gtf	exon	120675777	120675877	.	+	.	gene_id "A5:chr2H:120675905-120676007:120675877-120676007:+"; transcript_id "A5:chr2H:120675905-120676007:120675877-120676007:+:alternative2";
chr2H	PanBaRT20_trans_aveTPM10.gtf	exon	120676007	120676107	.	+	.	gene_id "A5:chr2H:120675905-120676007:120675877-120676007:+"; transcript_id "A5:chr2H:120675905-120676007:120675877-120676007:+:alternative2";
chr2H	PanBaRT20_trans_aveTPM10.gtf	exon	120975737	120975856	.	+	.	gene_id "A5:chr2H:120975856-120975953:120975837-120975953:+"; transcript_id "A5:chr2H:120975856-120975953:120975837-120975953:+:alternative1";
chr2H	PanBaRT20_trans_aveTPM10.gtf	exon	120975953	120976053	.	+	.	gene_id "A5:chr2H:120975856-120975953:120975837-120975953:+"; transcript_id "A5:chr2H:120975856-120975953:120975837-120975953:+:alternative1";
chr2H	PanBaRT20_trans_aveTPM10.gtf	exon	120975737	120975837	.	+	.	gene_id "A5:chr2H:120975856-120975953:120975837-120975953:+"; transcript_id "A5:chr2H:120975856-120975953:120975837-120975953:+:alternative2";
chr2H	PanBaRT20_trans_aveTPM10.gtf	exon	120975953	120976053	.	+	.	gene_id "A5:chr2H:120975856-120975953:120975837-120975953:+"; transcript_id "A5:chr2H:120975856-120975953:120975837-120975953:+:alternative2";
chr2H	PanBaRT20_trans_aveTPM10.gtf	exon	184810860	184810979	.	+	.	gene_id "A5:chr2H:184810979-184811326:184810960-184811326:+"; transcript_id "A5:chr2H:184810979-184811326:184810960-184811326:+:alternative1";
chr2H	PanBaRT20_trans_aveTPM10.gtf	exon	184811326	184811426	.	+	.	gene_id "A5:chr2H:184810979-184811326:184810960-184811326:+"; transcript_id "A5:chr2H:184810979-184811326:184810960-184811326:+:alternative1";
chr2H	PanBaRT20_trans_aveTPM10.gtf	exon	184810860	184810960	.	+	.	gene_id "A5:chr2H:184810979-184811326:184810960-184811326:+"; transcript_id "A5:chr2H:184810979-184811326:184810960-184811326:+:alternative2";
chr2H	PanBaRT20_trans_aveTPM10.gtf	exon	184811326	184811426	.	+	.	gene_id "A5:chr2H:184810979-184811326:184810960-184811326:+"; transcript_id "A5:chr2H:184810979-184811326:184810960-184811326:+:alternative2";
chr2H	PanBaRT20_trans_aveTPM10.gtf	exon	233096286	233096396	.	+	.	gene_id "A5:chr2H:233096396-233096484:233096386-233096484:+"; transcript_id "A5:chr2H:233096396-233096484:233096386-233096484:+:alternative1";
chr2H	PanBaRT20_trans_aveTPM10.gtf	exon	233096484	233096584	.	+	.	gene_id "A5:chr2H:233096396-233096484:233096386-233096484:+"; transcript_id "A5:chr2H:233096396-233096484:233096386-233096484:+:alternative1";
chr2H	PanBaRT20_trans_aveTPM10.gtf	exon	233096286	233096386	.	+	.	gene_id "A5:chr2H:233096396-233096484:233096386-233096484:+"; transcript_id "A5:chr2H:233096396-233096484:233096386-233096484:+:alternative2";
chr2H	PanBaRT20_trans_aveTPM10.gtf	exon	233096484	233096584	.	+	.	gene_id "A5:chr2H:233096396-233096484:233096386-233096484:+"; transcript_id "A5:chr2H:233096396-233096484:233096386-233096484:+:alternative2";
chr2H	PanBaRT20_trans_aveTPM10.gtf	exon	309522294	309522402	.	+	.	gene_id "A5:chr2H:309522402-309522495:309522394-309522495:+"; transcript_id "A5:chr2H:309522402-309522495:309522394-309522495:+:alternative1";
chr2H	PanBaRT20_trans_aveTPM10.gtf	exon	309522495	309522595	.	+	.	gene_id "A5:chr2H:309522402-309522495:309522394-309522495:+"; transcript_id "A5:chr2H:309522402-309522495:309522394-309522495:+:alternative1";
chr2H	PanBaRT20_trans_aveTPM10.gtf	exon	309522294	309522394	.	+	.	gene_id "A5:chr2H:309522402-309522495:309522394-309522495:+"; transcript_id "A5:chr2H:309522402-309522495:309522394-309522495:+:alternative2";
chr2H	PanBaRT20_trans_aveTPM10.gtf	exon	309522495	309522595	.	+	.	gene_id "A5:chr2H:309522402-309522495:309522394-309522495:+"; transcript_id "A5:chr2H:309522402-309522495:309522394-309522495:+:alternative2";
chr2H	PanBaRT20_trans_aveTPM10.gtf	exon	405896616	405896721	.	+	.	gene_id "A5:chr2H:405896721-405896813:405896716-405896813:+"; transcript_id "A5:chr2H:405896721-405896813:405896716-405896813:+:alternative1";
chr2H	PanBaRT20_trans_aveTPM10.gtf	exon	405896813	405896913	.	+	.	gene_id "A5:chr2H:405896721-405896813:405896716-405896813:+"; transcript_id "A5:chr2H:405896721-405896813:405896716-405896813:+:alternative1";
chr2H	PanBaRT20_trans_aveTPM10.gtf	exon	405896616	405896716	.	+	.	gene_id "A5:chr2H:405896721-405896813:405896716-405896813:+"; transcript_id "A5:chr2H:405896721-405896813:405896716-405896813:+:alternative2";
chr2H	PanBaRT20_trans_aveTPM10.gtf	exon	405896813	405896913	.	+	.	gene_id "A5:chr2H:405896721-405896813:405896716-405896813:+"; transcript_id "A5:chr2H:405896721-405896813:405896716-405896813:+:alternative2";
chr2H	PanBaRT20_trans_aveTPM10.gtf	exon	467362043	467362147	.	+	.	gene_id "A5:chr2H:467362147-467362231:467362143-467362231:+"; transcript_id "A5:chr2H:467362147-467362231:467362143-467362231:+:alternative1";
chr2H	PanBaRT20_trans_aveTPM10.gtf	exon	467362231	467362331	.	+	.	gene_id "A5:chr2H:467362147-467362231:467362143-467362231:+"; transcript_id "A5:chr2H:467362147-467362231:467362143-467362231:+:alternative1";
chr2H	PanBaRT20_trans_aveTPM10.gtf	exon	467362043	467362143	.	+	.	gene_id "A5:chr2H:467362147-467362231:467362143-467362231:+"; transcript_id "A5:chr2H:467362147-467362231:467362143-467362231:+:alternative2";
chr2H	PanBaRT20_trans_aveTPM10.gtf	exon	467362231	467362331	.	+	.	gene_id "A5:chr2H:467362147-467362231:467362143-467362231:+"; transcript_id "A5:chr2H:467362147-467362231:467362143-467362231:+:alternative2";
chr2H	PanBaRT20_trans_aveTPM10.gtf	exon	552767348	552767550	.	+	.	gene_id "A5:chr2H:552767550-552768181:552767448-552768181:+"; transcript_id "A5:chr2H:552767550-552768181:552767448-552768181:+:alternative1";
chr2H	PanBaRT20_trans_aveTPM10.gtf	exon	552768181	552768281	.	+	.	gene_id "A5:chr2H:552767550-552768181:552767448-552768181:+"; transcript_id "A5:chr2H:552767550-552768181:552767448-552768181:+:alternative1";
chr2H	PanBaRT20_trans_aveTPM10.gtf	exon	552767348	552767448	.	+	.	gene_id "A5:chr2H:552767550-552768181:552767448-552768181:+"; transcript_id "A5:chr2H:552767550-552768181:552767448-552768181:+:alternative2";
chr2H	PanBaRT20_trans_aveTPM10.gtf	exon	552768181	552768281	.	+	.	gene_id "A5:chr2H:552767550-552768181:552767448-552768181:+"; transcript_id "A5:chr2H:552767550-552768181:552767448-552768181:+:alternative2";
chr2H	PanBaRT20_trans_aveTPM10.gtf	exon	577016458	577016581	.	+	.	gene_id "A5:chr2H:577016581-577017369:577016558-577017369:+"; transcript_id "A5:chr2H:577016581-577017369:577016558-577017369:+:alternative1";
chr2H	PanBaRT20_trans_aveTPM10.gtf	exon	577017369	577017469	.	+	.	gene_id "A5:chr2H:577016581-577017369:577016558-577017369:+"; transcript_id "A5:chr2H:577016581-577017369:577016558-577017369:+:alternative1";
chr2H	PanBaRT20_trans_aveTPM10.gtf	exon	577016458	577016558	.	+	.	gene_id "A5:chr2H:577016581-577017369:577016558-577017369:+"; transcript_id "A5:chr2H:577016581-577017369:577016558-577017369:+:alternative2";
chr2H	PanBaRT20_trans_aveTPM10.gtf	exon	577017369	577017469	.	+	.	gene_id "A5:chr2H:577016581-577017369:577016558-577017369:+"; transcript_id "A5:chr2H:577016581-577017369:577016558-577017369:+:alternative2";
chr2H	PanBaRT20_trans_aveTPM10.gtf	exon	681826161	681826265	.	+	.	gene_id "A5:chr2H:681826265-681826716:681826261-681826716:+"; transcript_id "A5:chr2H:681826265-681826716:681826261-681826716:+:alternative1";
chr2H	PanBaRT20_trans_aveTPM10.gtf	exon	681826716	681826816	.	+	.	gene_id "A5:chr2H:681826265-681826716:681826261-681826716:+"; transcript_id "A5:chr2H:681826265-681826716:681826261-681826716:+:alternative1";
chr2H	PanBaRT20_trans_aveTPM10.gtf	exon	681826161	681826261	.	+	.	gene_id "A5:chr2H:681826265-681826716:681826261-681826716:+"; transcript_id "A5:chr2H:681826265-681826716:681826261-681826716:+:alternative2";
chr2H	PanBaRT20_trans_aveTPM10.gtf	exon	681826716	681826816	.	+	.	gene_id "A5:chr2H:681826265-681826716:681826261-681826716:+"; transcript_id "A5:chr2H:681826265-681826716:681826261-681826716:+:alternative2";
chr2H	PanBaRT20_trans_aveTPM10.gtf	exon	683472245	683472479	.	+	.	gene_id "A5:chr2H:683472479-683474560:683472345-683474560:+"; transcript_id "A5:chr2H:683472479-683474560:683472345-683474560:+:alternative1";
chr2H	PanBaRT20_trans_aveTPM10.gtf	exon	683474560	683474660	.	+	.	gene_id "A5:chr2H:683472479-683474560:683472345-683474560:+"; transcript_id "A5:chr2H:683472479-683474560:683472345-683474560:+:alternative1";
chr2H	PanBaRT20_trans_aveTPM10.gtf	exon	683472245	683472345	.	+	.	gene_id "A5:chr2H:683472479-683474560:683472345-683474560:+"; transcript_id "A5:chr2H:683472479-683474560:683472345-683474560:+:alternative2";
chr2H	PanBaRT20_trans_aveTPM10.gtf	exon	683474560	683474660	.	+	.	gene_id "A5:chr2H:683472479-683474560:683472345-683474560:+"; transcript_id "A5:chr2H:683472479-683474560:683472345-683474560:+:alternative2";
chr2H	PanBaRT20_trans_aveTPM10.gtf	exon	701178893	701179289	.	+	.	gene_id "A5:chr2H:701179289-701180392:701178993-701180392:+"; transcript_id "A5:chr2H:701179289-701180392:701178993-701180392:+:alternative1";
chr2H	PanBaRT20_trans_aveTPM10.gtf	exon	701180392	701180492	.	+	.	gene_id "A5:chr2H:701179289-701180392:701178993-701180392:+"; transcript_id "A5:chr2H:701179289-701180392:701178993-701180392:+:alternative1";
chr2H	PanBaRT20_trans_aveTPM10.gtf	exon	701178893	701178993	.	+	.	gene_id "A5:chr2H:701179289-701180392:701178993-701180392:+"; transcript_id "A5:chr2H:701179289-701180392:701178993-701180392:+:alternative2";
chr2H	PanBaRT20_trans_aveTPM10.gtf	exon	701180392	701180492	.	+	.	gene_id "A5:chr2H:701179289-701180392:701178993-701180392:+"; transcript_id "A5:chr2H:701179289-701180392:701178993-701180392:+:alternative2";
chr3H	PanBaRT20_trans_aveTPM10.gtf	exon	10463930	10464030	.	-	.	gene_id "A5:chr3H:10464030-10464149:10464030-10464153:-"; transcript_id "A5:chr3H:10464030-10464149:10464030-10464153:-:alternative1";
chr3H	PanBaRT20_trans_aveTPM10.gtf	exon	10464149	10464253	.	-	.	gene_id "A5:chr3H:10464030-10464149:10464030-10464153:-"; transcript_id "A5:chr3H:10464030-10464149:10464030-10464153:-:alternative1";
chr3H	PanBaRT20_trans_aveTPM10.gtf	exon	10463930	10464030	.	-	.	gene_id "A5:chr3H:10464030-10464149:10464030-10464153:-"; transcript_id "A5:chr3H:10464030-10464149:10464030-10464153:-:alternative2";
chr3H	PanBaRT20_trans_aveTPM10.gtf	exon	10464153	10464253	.	-	.	gene_id "A5:chr3H:10464030-10464149:10464030-10464153:-"; transcript_id "A5:chr3H:10464030-10464149:10464030-10464153:-:alternative2";
chr3H	PanBaRT20_trans_aveTPM10.gtf	exon	28651035	28651135	.	-	.	gene_id "A5:chr3H:28651135-28651693:28651135-28651704:-"; transcript_id "A5:chr3H:28651135-28651693:28651135-28651704:-:alternative1";
chr3H	PanBaRT20_trans_aveTPM10.gtf	exon	28651693	28651804	.	-	.	gene_id "A5:chr3H:28651135-28651693:28651135-28651704:-"; transcript_id "A5:chr3H:28651135-28651693:28651135-28651704:-:alternative1";
chr3H	PanBaRT20_trans_aveTPM10.gtf	exon	28651035	28651135	.	-	.	gene_id "A5:chr3H:28651135-28651693:28651135-28651704:-"; transcript_id "A5:chr3H:28651135-28651693:28651135-28651704:-:alternative2";
chr3H	PanBaRT20_trans_aveTPM10.gtf	exon	28651704	28651804	.	-	.	gene_id "A5:chr3H:28651135-28651693:28651135-28651704:-"; transcript_id "A5:chr3H:28651135-28651693:28651135-28651704:-:alternative2";
chr3H	PanBaRT20_trans_aveTPM10.gtf	exon	34170351	34170451	.	-	.	gene_id "A5:chr3H:34170451-34170522:34170451-34170653:-"; transcript_id "A5:chr3H:34170451-34170522:34170451-34170653:-:alternative1";
chr3H	PanBaRT20_trans_aveTPM10.gtf	exon	34170522	34170753	.	-	.	gene_id "A5:chr3H:34170451-34170522:34170451-34170653:-"; transcript_id "A5:chr3H:34170451-34170522:34170451-34170653:-:alternative1";
chr3H	PanBaRT20_trans_aveTPM10.gtf	exon	34170351	34170451	.	-	.	gene_id "A5:chr3H:34170451-34170522:34170451-34170653:-"; transcript_id "A5:chr3H:34170451-34170522:34170451-34170653:-:alternative2";
chr3H	PanBaRT20_trans_aveTPM10.gtf	exon	34170653	34170753	.	-	.	gene_id "A5:chr3H:34170451-34170522:34170451-34170653:-"; transcript_id "A5:chr3H:34170451-34170522:34170451-34170653:-:alternative2";
chr3H	PanBaRT20_trans_aveTPM10.gtf	exon	56799756	56799856	.	-	.	gene_id "A5:chr3H:56799856-56799937:56799856-56799952:-"; transcript_id "A5:chr3H:56799856-56799937:56799856-56799952:-:alternative1";
chr3H	PanBaRT20_trans_aveTPM10.gtf	exon	56799937	56800052	.	-	.	gene_id "A5:chr3H:56799856-56799937:56799856-56799952:-"; transcript_id "A5:chr3H:56799856-56799937:56799856-56799952:-:alternative1";
chr3H	PanBaRT20_trans_aveTPM10.gtf	exon	56799756	56799856	.	-	.	gene_id "A5:chr3H:56799856-56799937:56799856-56799952:-"; transcript_id "A5:chr3H:56799856-56799937:56799856-56799952:-:alternative2";
chr3H	PanBaRT20_trans_aveTPM10.gtf	exon	56799952	56800052	.	-	.	gene_id "A5:chr3H:56799856-56799937:56799856-56799952:-"; transcript_id "A5:chr3H:56799856-56799937:56799856-56799952:-:alternative2";
chr3H	PanBaRT20_trans_aveTPM10.gtf	exon	191831833	191831933	.	-	.	gene_id "A5:chr3H:191831933-191832024:191831933-191832027:-"; transcript_id "A5:chr3H:191831933-191832024:191831933-191832027:-:alternative1";
chr3H	PanBaRT20_trans_aveTPM10.gtf	exon	191832024	191832127	.	-	.	gene_id "A5:chr3H:191831933-191832024:191831933-191832027:-"; transcript_id "A5:chr3H:191831933-191832024:191831933-191832027:-:alternative1";
chr3H	PanBaRT20_trans_aveTPM10.gtf	exon	191831833	191831933	.	-	.	gene_id "A5:chr3H:191831933-191832024:191831933-191832027:-"; transcript_id "A5:chr3H:191831933-191832024:191831933-191832027:-:alternative2";
chr3H	PanBaRT20_trans_aveTPM10.gtf	exon	191832027	191832127	.	-	.	gene_id "A5:chr3H:191831933-191832024:191831933-191832027:-"; transcript_id "A5:chr3H:191831933-191832024:191831933-191832027:-:alternative2";
chr3H	PanBaRT20_trans_aveTPM10.gtf	exon	267614298	267614398	.	-	.	gene_id "A5:chr3H:267614398-267614504:267614398-267614514:-"; transcript_id "A5:chr3H:267614398-267614504:267614398-267614514:-:alternative1";
chr3H	PanBaRT20_trans_aveTPM10.gtf	exon	267614504	267614614	.	-	.	gene_id "A5:chr3H:267614398-267614504:267614398-267614514:-"; transcript_id "A5:chr3H:267614398-267614504:267614398-267614514:-:alternative1";
chr3H	PanBaRT20_trans_aveTPM10.gtf	exon	267614298	267614398	.	-	.	gene_id "A5:chr3H:267614398-267614504:267614398-267614514:-"; transcript_id "A5:chr3H:267614398-267614504:267614398-267614514:-:alternative2";
chr3H	PanBaRT20_trans_aveTPM10.gtf	exon	267614514	267614614	.	-	.	gene_id "A5:chr3H:267614398-267614504:267614398-267614514:-"; transcript_id "A5:chr3H:267614398-267614504:267614398-267614514:-:alternative2";
chr3H	PanBaRT20_trans_aveTPM10.gtf	exon	330438400	330438500	.	-	.	gene_id "A5:chr3H:330438500-330440503:330438500-330440513:-"; transcript_id "A5:chr3H:330438500-330440503:330438500-330440513:-:alternative1";
chr3H	PanBaRT20_trans_aveTPM10.gtf	exon	330440503	330440613	.	-	.	gene_id "A5:chr3H:330438500-330440503:330438500-330440513:-"; transcript_id "A5:chr3H:330438500-330440503:330438500-330440513:-:alternative1";
chr3H	PanBaRT20_trans_aveTPM10.gtf	exon	330438400	330438500	.	-	.	gene_id "A5:chr3H:330438500-330440503:330438500-330440513:-"; transcript_id "A5:chr3H:330438500-330440503:330438500-330440513:-:alternative2";
chr3H	PanBaRT20_trans_aveTPM10.gtf	exon	330440513	330440613	.	-	.	gene_id "A5:chr3H:330438500-330440503:330438500-330440513:-"; transcript_id "A5:chr3H:330438500-330440503:330438500-330440513:-:alternative2";
chr3H	PanBaRT20_trans_aveTPM10.gtf	exon	455826957	455827057	.	-	.	gene_id "A5:chr3H:455827057-455828044:455827057-455828346:-"; transcript_id "A5:chr3H:455827057-455828044:455827057-455828346:-:alternative1";
chr3H	PanBaRT20_trans_aveTPM10.gtf	exon	455828044	455828446	.	-	.	gene_id "A5:chr3H:455827057-455828044:455827057-455828346:-"; transcript_id "A5:chr3H:455827057-455828044:455827057-455828346:-:alternative1";
chr3H	PanBaRT20_trans_aveTPM10.gtf	exon	455826957	455827057	.	-	.	gene_id "A5:chr3H:455827057-455828044:455827057-455828346:-"; transcript_id "A5:chr3H:455827057-455828044:455827057-455828346:-:alternative2";
chr3H	PanBaRT20_trans_aveTPM10.gtf	exon	455828346	455828446	.	-	.	gene_id "A5:chr3H:455827057-455828044:455827057-455828346:-"; transcript_id "A5:chr3H:455827057-455828044:455827057-455828346:-:alternative2";
chr3H	PanBaRT20_trans_aveTPM10.gtf	exon	528152186	528152286	.	-	.	gene_id "A5:chr3H:528152286-528152943:528152286-528153026:-"; transcript_id "A5:chr3H:528152286-528152943:528152286-528153026:-:alternative1";
chr3H	PanBaRT20_trans_aveTPM10.gtf	exon	528152943	528153126	.	-	.	gene_id "A5:chr3H:528152286-528152943:528152286-528153026:-"; transcript_id "A5:chr3H:528152286-528152943:528152286-528153026:-:alternative1";
chr3H	PanBaRT20_trans_aveTPM10.gtf	exon	528152186	528152286	.	-	.	gene_id "A5:chr3H:528152286-528152943:528152286-528153026:-"; transcript_id "A5:chr3H:528152286-528152943:528152286-528153026:-:alternative2";
chr3H	PanBaRT20_trans_aveTPM10.gtf	exon	528153026	528153126	.	-	.	gene_id "A5:chr3H:528152286-528152943:528152286-528153026:-"; transcript_id "A5:chr3H:528152286-528152943:528152286-528153026:-:alternative2";
chr3H	PanBaRT20_trans_aveTPM10.gtf	exon	585662615	585662715	.	-	.	gene_id "A5:chr3H:585662715-585664625:585662715-585664627:-"; transcript_id "A5:chr3H:585662715-585664625:585662715-585664627:-:alternative1";
chr3H	PanBaRT20_trans_aveTPM10.gtf	exon	585664625	585664727	.	-	.	gene_id "A5:chr3H:585662715-585664625:585662715-585664627:-"; transcript_id "A5:chr3H:585662715-585664625:585662715-585664627:-:alternative1";
chr3H	PanBaRT20_trans_aveTPM10.gtf	exon	585662615	585662715	.	-	.	gene_id "A5:chr3H:585662715-585664625:585662715-585664627:-"; transcript_id "A5:chr3H:585662715-585664625:585662715-585664627:-:alternative2";
chr3H	PanBaRT20_trans_aveTPM10.gtf	exon	585664627	585664727	.	-	.	gene_id "A5:chr3H:585662715-585664625:585662715-585664627:-"; transcript_id "A5:chr3H:585662715-585664625:585662715-585664627:-:alternative2";
chr3H	PanBaRT20_trans_aveTPM10.gtf	exon	588366645	588366745	.	-	.	gene_id "A5:chr3H:588366745-588368040:588366745-588368776:-"; transcript_id "A5:chr3H:588366745-588368040:588366745-588368776:-:alternative1";
chr3H	PanBaRT20_trans_aveTPM10.gtf	exon	588368040	588368876	.	-	.	gene_id "A5:chr3H:588366745-588368040:588366745-588368776:-"; transcript_id "A5:chr3H:588366745-588368040:588366745-588368776:-:alternative1";
chr3H	PanBaRT20_trans_aveTPM10.gtf	exon	588366645	588366745	.	-	.	gene_id "A5:chr3H:588366745-588368040:588366745-588368776:-"; transcript_id "A5:chr3H:588366745-588368040:588366745-588368776:-:alternative2";
chr3H	PanBaRT20_trans_aveTPM10.gtf	exon	588368776	588368876	.	-	.	gene_id "A5:chr3H:588366745-588368040:588366745-588368776:-"; transcript_id "A5:chr3H:588366745-588368040:588366745-588368776:-:alternative2";
chr3H	PanBaRT20_trans_aveTPM10.gtf	exon	595600026	595600126	.	-	.	gene_id "A5:chr3H:595600126-595601263:595600126-595601278:-"; transcript_id "A5:chr3H:595600126-595601263:595600126-595601278:-:alternative1";
chr3H	PanBaRT20_trans_aveTPM10.gtf	exon	595601263	595601378	.	-	.	gene_id "A5:chr3H:595600126-595601263:595600126-595601278:-"; transcript_id "A5:chr3H:595600126-595601263:595600126-595601278:-:alternative1";
chr3H	PanBaRT20_trans_aveTPM10.gtf	exon	595600026	595600126	.	-	.	gene_id "A5:chr3H:595600126-595601263:595600126-595601278:-"; transcript_id "A5:chr3H:595600126-595601263:595600126-595601278:-:alternative2";
chr3H	PanBaRT20_trans_aveTPM10.gtf	exon	595601278	595601378	.	-	.	gene_id "A5:chr3H:595600126-595601263:595600126-595601278:-"; transcript_id "A5:chr3H:595600126-595601263:595600126-595601278:-:alternative2";
chr3H	PanBaRT20_trans_aveTPM10.gtf	exon	629343246	629343346	.	-	.	gene_id "A5:chr3H:629343346-629344239:629343346-629344466:-"; transcript_id "A5:chr3H:629343346-629344239:629343346-629344466:-:alternative1";
chr3H	PanBaRT20_trans_aveTPM10.gtf	exon	629344239	629344566	.	-	.	gene_id "A5:chr3H:629343346-629344239:629343346-629344466:-"; transcript_id "A5:chr3H:629343346-629344239:629343346-629344466:-:alternative1";
chr3H	PanBaRT20_trans_aveTPM10.gtf	exon	629343246	629343346	.	-	.	gene_id "A5:chr3H:629343346-629344239:629343346-629344466:-"; transcript_id "A5:chr3H:629343346-629344239:629343346-629344466:-:alternative2";
chr3H	PanBaRT20_trans_aveTPM10.gtf	exon	629344466	629344566	.	-	.	gene_id "A5:chr3H:629343346-629344239:629343346-629344466:-"; transcript_id "A5:chr3H:629343346-629344239:629343346-629344466:-:alternative2";
chr3H	PanBaRT20_trans_aveTPM10.gtf	exon	653539950	653540050	.	-	.	gene_id "A5:chr3H:653540050-653540564:653540050-653540575:-"; transcript_id "A5:chr3H:653540050-653540564:653540050-653540575:-:alternative1";
chr3H	PanBaRT20_trans_aveTPM10.gtf	exon	653540564	653540675	.	-	.	gene_id "A5:chr3H:653540050-653540564:653540050-653540575:-"; transcript_id "A5:chr3H:653540050-653540564:653540050-653540575:-:alternative1";
chr3H	PanBaRT20_trans_aveTPM10.gtf	exon	653539950	653540050	.	-	.	gene_id "A5:chr3H:653540050-653540564:653540050-653540575:-"; transcript_id "A5:chr3H:653540050-653540564:653540050-653540575:-:alternative2";
chr3H	PanBaRT20_trans_aveTPM10.gtf	exon	653540575	653540675	.	-	.	gene_id "A5:chr3H:653540050-653540564:653540050-653540575:-"; transcript_id "A5:chr3H:653540050-653540564:653540050-653540575:-:alternative2";
chr3H	PanBaRT20_trans_aveTPM10.gtf	exon	674890580	674890680	.	-	.	gene_id "A5:chr3H:674890680-674890786:674890680-674890822:-"; transcript_id "A5:chr3H:674890680-674890786:674890680-674890822:-:alternative1";
chr3H	PanBaRT20_trans_aveTPM10.gtf	exon	674890786	674890922	.	-	.	gene_id "A5:chr3H:674890680-674890786:674890680-674890822:-"; transcript_id "A5:chr3H:674890680-674890786:674890680-674890822:-:alternative1";
chr3H	PanBaRT20_trans_aveTPM10.gtf	exon	674890580	674890680	.	-	.	gene_id "A5:chr3H:674890680-674890786:674890680-674890822:-"; transcript_id "A5:chr3H:674890680-674890786:674890680-674890822:-:alternative2";
chr3H	PanBaRT20_trans_aveTPM10.gtf	exon	674890822	674890922	.	-	.	gene_id "A5:chr3H:674890680-674890786:674890680-674890822:-"; transcript_id "A5:chr3H:674890680-674890786:674890680-674890822:-:alternative2";
chr3H	PanBaRT20_trans_aveTPM10.gtf	exon	678585937	678586037	.	-	.	gene_id "A5:chr3H:678586037-678586170:678586037-678586243:-"; transcript_id "A5:chr3H:678586037-678586170:678586037-678586243:-:alternative1";
chr3H	PanBaRT20_trans_aveTPM10.gtf	exon	678586170	678586343	.	-	.	gene_id "A5:chr3H:678586037-678586170:678586037-678586243:-"; transcript_id "A5:chr3H:678586037-678586170:678586037-678586243:-:alternative1";
chr3H	PanBaRT20_trans_aveTPM10.gtf	exon	678585937	678586037	.	-	.	gene_id "A5:chr3H:678586037-678586170:678586037-678586243:-"; transcript_id "A5:chr3H:678586037-678586170:678586037-678586243:-:alternative2";
chr3H	PanBaRT20_trans_aveTPM10.gtf	exon	678586243	678586343	.	-	.	gene_id "A5:chr3H:678586037-678586170:678586037-678586243:-"; transcript_id "A5:chr3H:678586037-678586170:678586037-678586243:-:alternative2";
chr3H	PanBaRT20_trans_aveTPM10.gtf	exon	87420124	87420234	.	+	.	gene_id "A5:chr3H:87420234-87420311:87420224-87420311:+"; transcript_id "A5:chr3H:87420234-87420311:87420224-87420311:+:alternative1";
chr3H	PanBaRT20_trans_aveTPM10.gtf	exon	87420311	87420411	.	+	.	gene_id "A5:chr3H:87420234-87420311:87420224-87420311:+"; transcript_id "A5:chr3H:87420234-87420311:87420224-87420311:+:alternative1";
chr3H	PanBaRT20_trans_aveTPM10.gtf	exon	87420124	87420224	.	+	.	gene_id "A5:chr3H:87420234-87420311:87420224-87420311:+"; transcript_id "A5:chr3H:87420234-87420311:87420224-87420311:+:alternative2";
chr3H	PanBaRT20_trans_aveTPM10.gtf	exon	87420311	87420411	.	+	.	gene_id "A5:chr3H:87420234-87420311:87420224-87420311:+"; transcript_id "A5:chr3H:87420234-87420311:87420224-87420311:+:alternative2";
chr3H	PanBaRT20_trans_aveTPM10.gtf	exon	109359922	109360170	.	+	.	gene_id "A5:chr3H:109360170-109360249:109360022-109360249:+"; transcript_id "A5:chr3H:109360170-109360249:109360022-109360249:+:alternative1";
chr3H	PanBaRT20_trans_aveTPM10.gtf	exon	109360249	109360349	.	+	.	gene_id "A5:chr3H:109360170-109360249:109360022-109360249:+"; transcript_id "A5:chr3H:109360170-109360249:109360022-109360249:+:alternative1";
chr3H	PanBaRT20_trans_aveTPM10.gtf	exon	109359922	109360022	.	+	.	gene_id "A5:chr3H:109360170-109360249:109360022-109360249:+"; transcript_id "A5:chr3H:109360170-109360249:109360022-109360249:+:alternative2";
chr3H	PanBaRT20_trans_aveTPM10.gtf	exon	109360249	109360349	.	+	.	gene_id "A5:chr3H:109360170-109360249:109360022-109360249:+"; transcript_id "A5:chr3H:109360170-109360249:109360022-109360249:+:alternative2";
chr3H	PanBaRT20_trans_aveTPM10.gtf	exon	529189190	529189292	.	+	.	gene_id "A5:chr3H:529189292-529189384:529189290-529189384:+"; transcript_id "A5:chr3H:529189292-529189384:529189290-529189384:+:alternative1";
chr3H	PanBaRT20_trans_aveTPM10.gtf	exon	529189384	529189484	.	+	.	gene_id "A5:chr3H:529189292-529189384:529189290-529189384:+"; transcript_id "A5:chr3H:529189292-529189384:529189290-529189384:+:alternative1";
chr3H	PanBaRT20_trans_aveTPM10.gtf	exon	529189190	529189290	.	+	.	gene_id "A5:chr3H:529189292-529189384:529189290-529189384:+"; transcript_id "A5:chr3H:529189292-529189384:529189290-529189384:+:alternative2";
chr3H	PanBaRT20_trans_aveTPM10.gtf	exon	529189384	529189484	.	+	.	gene_id "A5:chr3H:529189292-529189384:529189290-529189384:+"; transcript_id "A5:chr3H:529189292-529189384:529189290-529189384:+:alternative2";
chr3H	PanBaRT20_trans_aveTPM10.gtf	exon	543955710	543958081	.	+	.	gene_id "A5:chr3H:543958081-543958925:543955810-543958925:+"; transcript_id "A5:chr3H:543958081-543958925:543955810-543958925:+:alternative1";
chr3H	PanBaRT20_trans_aveTPM10.gtf	exon	543958925	543959025	.	+	.	gene_id "A5:chr3H:543958081-543958925:543955810-543958925:+"; transcript_id "A5:chr3H:543958081-543958925:543955810-543958925:+:alternative1";
chr3H	PanBaRT20_trans_aveTPM10.gtf	exon	543955710	543955810	.	+	.	gene_id "A5:chr3H:543958081-543958925:543955810-543958925:+"; transcript_id "A5:chr3H:543958081-543958925:543955810-543958925:+:alternative2";
chr3H	PanBaRT20_trans_aveTPM10.gtf	exon	543958925	543959025	.	+	.	gene_id "A5:chr3H:543958081-543958925:543955810-543958925:+"; transcript_id "A5:chr3H:543958081-543958925:543955810-543958925:+:alternative2";
chr3H	PanBaRT20_trans_aveTPM10.gtf	exon	565855664	565855785	.	+	.	gene_id "A5:chr3H:565855785-565855854:565855764-565855854:+"; transcript_id "A5:chr3H:565855785-565855854:565855764-565855854:+:alternative1";
chr3H	PanBaRT20_trans_aveTPM10.gtf	exon	565855854	565855954	.	+	.	gene_id "A5:chr3H:565855785-565855854:565855764-565855854:+"; transcript_id "A5:chr3H:565855785-565855854:565855764-565855854:+:alternative1";
chr3H	PanBaRT20_trans_aveTPM10.gtf	exon	565855664	565855764	.	+	.	gene_id "A5:chr3H:565855785-565855854:565855764-565855854:+"; transcript_id "A5:chr3H:565855785-565855854:565855764-565855854:+:alternative2";
chr3H	PanBaRT20_trans_aveTPM10.gtf	exon	565855854	565855954	.	+	.	gene_id "A5:chr3H:565855785-565855854:565855764-565855854:+"; transcript_id "A5:chr3H:565855785-565855854:565855764-565855854:+:alternative2";
chr3H	PanBaRT20_trans_aveTPM10.gtf	exon	577906219	577906338	.	+	.	gene_id "A5:chr3H:577906338-577906421:577906319-577906421:+"; transcript_id "A5:chr3H:577906338-577906421:577906319-577906421:+:alternative1";
chr3H	PanBaRT20_trans_aveTPM10.gtf	exon	577906421	577906521	.	+	.	gene_id "A5:chr3H:577906338-577906421:577906319-577906421:+"; transcript_id "A5:chr3H:577906338-577906421:577906319-577906421:+:alternative1";
chr3H	PanBaRT20_trans_aveTPM10.gtf	exon	577906219	577906319	.	+	.	gene_id "A5:chr3H:577906338-577906421:577906319-577906421:+"; transcript_id "A5:chr3H:577906338-577906421:577906319-577906421:+:alternative2";
chr3H	PanBaRT20_trans_aveTPM10.gtf	exon	577906421	577906521	.	+	.	gene_id "A5:chr3H:577906338-577906421:577906319-577906421:+"; transcript_id "A5:chr3H:577906338-577906421:577906319-577906421:+:alternative2";
chr3H	PanBaRT20_trans_aveTPM10.gtf	exon	617857129	617857234	.	+	.	gene_id "A5:chr3H:617857234-617857433:617857229-617857433:+"; transcript_id "A5:chr3H:617857234-617857433:617857229-617857433:+:alternative1";
chr3H	PanBaRT20_trans_aveTPM10.gtf	exon	617857433	617857533	.	+	.	gene_id "A5:chr3H:617857234-617857433:617857229-617857433:+"; transcript_id "A5:chr3H:617857234-617857433:617857229-617857433:+:alternative1";
chr3H	PanBaRT20_trans_aveTPM10.gtf	exon	617857129	617857229	.	+	.	gene_id "A5:chr3H:617857234-617857433:617857229-617857433:+"; transcript_id "A5:chr3H:617857234-617857433:617857229-617857433:+:alternative2";
chr3H	PanBaRT20_trans_aveTPM10.gtf	exon	617857433	617857533	.	+	.	gene_id "A5:chr3H:617857234-617857433:617857229-617857433:+"; transcript_id "A5:chr3H:617857234-617857433:617857229-617857433:+:alternative2";
chr3H	PanBaRT20_trans_aveTPM10.gtf	exon	669137335	669137447	.	+	.	gene_id "A5:chr3H:669137447-669137578:669137435-669137578:+"; transcript_id "A5:chr3H:669137447-669137578:669137435-669137578:+:alternative1";
chr3H	PanBaRT20_trans_aveTPM10.gtf	exon	669137578	669137678	.	+	.	gene_id "A5:chr3H:669137447-669137578:669137435-669137578:+"; transcript_id "A5:chr3H:669137447-669137578:669137435-669137578:+:alternative1";
chr3H	PanBaRT20_trans_aveTPM10.gtf	exon	669137335	669137435	.	+	.	gene_id "A5:chr3H:669137447-669137578:669137435-669137578:+"; transcript_id "A5:chr3H:669137447-669137578:669137435-669137578:+:alternative2";
chr3H	PanBaRT20_trans_aveTPM10.gtf	exon	669137578	669137678	.	+	.	gene_id "A5:chr3H:669137447-669137578:669137435-669137578:+"; transcript_id "A5:chr3H:669137447-669137578:669137435-669137578:+:alternative2";
chr4H	PanBaRT20_trans_aveTPM10.gtf	exon	165486197	165486297	.	-	.	gene_id "A5:chr4H:165486297-165486413:165486297-165486431:-"; transcript_id "A5:chr4H:165486297-165486413:165486297-165486431:-:alternative1";
chr4H	PanBaRT20_trans_aveTPM10.gtf	exon	165486413	165486531	.	-	.	gene_id "A5:chr4H:165486297-165486413:165486297-165486431:-"; transcript_id "A5:chr4H:165486297-165486413:165486297-165486431:-:alternative1";
chr4H	PanBaRT20_trans_aveTPM10.gtf	exon	165486197	165486297	.	-	.	gene_id "A5:chr4H:165486297-165486413:165486297-165486431:-"; transcript_id "A5:chr4H:165486297-165486413:165486297-165486431:-:alternative2";
chr4H	PanBaRT20_trans_aveTPM10.gtf	exon	165486431	165486531	.	-	.	gene_id "A5:chr4H:165486297-165486413:165486297-165486431:-"; transcript_id "A5:chr4H:165486297-165486413:165486297-165486431:-:alternative2";
chr4H	PanBaRT20_trans_aveTPM10.gtf	exon	353698340	353698440	.	-	.	gene_id "A5:chr4H:353698440-353699009:353698440-353700191:-"; transcript_id "A5:chr4H:353698440-353699009:353698440-353700191:-:alternative1";
chr4H	PanBaRT20_trans_aveTPM10.gtf	exon	353699009	353700291	.	-	.	gene_id "A5:chr4H:353698440-353699009:353698440-353700191:-"; transcript_id "A5:chr4H:353698440-353699009:353698440-353700191:-:alternative1";
chr4H	PanBaRT20_trans_aveTPM10.gtf	exon	353698340	353698440	.	-	.	gene_id "A5:chr4H:353698440-353699009:353698440-353700191:-"; transcript_id "A5:chr4H:353698440-353699009:353698440-353700191:-:alternative2";
chr4H	PanBaRT20_trans_aveTPM10.gtf	exon	353700191	353700291	.	-	.	gene_id "A5:chr4H:353698440-353699009:353698440-353700191:-"; transcript_id "A5:chr4H:353698440-353699009:353698440-353700191:-:alternative2";
chr4H	PanBaRT20_trans_aveTPM10.gtf	exon	533637105	533637205	.	-	.	gene_id "A5:chr4H:533637205-533637303:533637205-533638324:-"; transcript_id "A5:chr4H:533637205-533637303:533637205-533638324:-:alternative1";
chr4H	PanBaRT20_trans_aveTPM10.gtf	exon	533637303	533638424	.	-	.	gene_id "A5:chr4H:533637205-533637303:533637205-533638324:-"; transcript_id "A5:chr4H:533637205-533637303:533637205-533638324:-:alternative1";
chr4H	PanBaRT20_trans_aveTPM10.gtf	exon	533637105	533637205	.	-	.	gene_id "A5:chr4H:533637205-533637303:533637205-533638324:-"; transcript_id "A5:chr4H:533637205-533637303:533637205-533638324:-:alternative2";
chr4H	PanBaRT20_trans_aveTPM10.gtf	exon	533638324	533638424	.	-	.	gene_id "A5:chr4H:533637205-533637303:533637205-533638324:-"; transcript_id "A5:chr4H:533637205-533637303:533637205-533638324:-:alternative2";
chr4H	PanBaRT20_trans_aveTPM10.gtf	exon	611970753	611970853	.	-	.	gene_id "A5:chr4H:611970853-611971345:611970853-611971348:-"; transcript_id "A5:chr4H:611970853-611971345:611970853-611971348:-:alternative1";
chr4H	PanBaRT20_trans_aveTPM10.gtf	exon	611971345	611971448	.	-	.	gene_id "A5:chr4H:611970853-611971345:611970853-611971348:-"; transcript_id "A5:chr4H:611970853-611971345:611970853-611971348:-:alternative1";
chr4H	PanBaRT20_trans_aveTPM10.gtf	exon	611970753	611970853	.	-	.	gene_id "A5:chr4H:611970853-611971345:611970853-611971348:-"; transcript_id "A5:chr4H:611970853-611971345:611970853-611971348:-:alternative2";
chr4H	PanBaRT20_trans_aveTPM10.gtf	exon	611971348	611971448	.	-	.	gene_id "A5:chr4H:611970853-611971345:611970853-611971348:-"; transcript_id "A5:chr4H:611970853-611971345:611970853-611971348:-:alternative2";
chr4H	PanBaRT20_trans_aveTPM10.gtf	exon	611971559	611971659	.	-	.	gene_id "A5:chr4H:611971659-611971741:611971659-611971764:-"; transcript_id "A5:chr4H:611971659-611971741:611971659-611971764:-:alternative1";
chr4H	PanBaRT20_trans_aveTPM10.gtf	exon	611971741	611971864	.	-	.	gene_id "A5:chr4H:611971659-611971741:611971659-611971764:-"; transcript_id "A5:chr4H:611971659-611971741:611971659-611971764:-:alternative1";
chr4H	PanBaRT20_trans_aveTPM10.gtf	exon	611971559	611971659	.	-	.	gene_id "A5:chr4H:611971659-611971741:611971659-611971764:-"; transcript_id "A5:chr4H:611971659-611971741:611971659-611971764:-:alternative2";
chr4H	PanBaRT20_trans_aveTPM10.gtf	exon	611971764	611971864	.	-	.	gene_id "A5:chr4H:611971659-611971741:611971659-611971764:-"; transcript_id "A5:chr4H:611971659-611971741:611971659-611971764:-:alternative2";
chr4H	PanBaRT20_trans_aveTPM10.gtf	exon	5316216	5316320	.	+	.	gene_id "A5:chr4H:5316320-5316435:5316316-5316435:+"; transcript_id "A5:chr4H:5316320-5316435:5316316-5316435:+:alternative1";
chr4H	PanBaRT20_trans_aveTPM10.gtf	exon	5316435	5316535	.	+	.	gene_id "A5:chr4H:5316320-5316435:5316316-5316435:+"; transcript_id "A5:chr4H:5316320-5316435:5316316-5316435:+:alternative1";
chr4H	PanBaRT20_trans_aveTPM10.gtf	exon	5316216	5316316	.	+	.	gene_id "A5:chr4H:5316320-5316435:5316316-5316435:+"; transcript_id "A5:chr4H:5316320-5316435:5316316-5316435:+:alternative2";
chr4H	PanBaRT20_trans_aveTPM10.gtf	exon	5316435	5316535	.	+	.	gene_id "A5:chr4H:5316320-5316435:5316316-5316435:+"; transcript_id "A5:chr4H:5316320-5316435:5316316-5316435:+:alternative2";
chr4H	PanBaRT20_trans_aveTPM10.gtf	exon	31688633	31688747	.	+	.	gene_id "A5:chr4H:31688747-31688835:31688733-31688835:+"; transcript_id "A5:chr4H:31688747-31688835:31688733-31688835:+:alternative1";
chr4H	PanBaRT20_trans_aveTPM10.gtf	exon	31688835	31688935	.	+	.	gene_id "A5:chr4H:31688747-31688835:31688733-31688835:+"; transcript_id "A5:chr4H:31688747-31688835:31688733-31688835:+:alternative1";
chr4H	PanBaRT20_trans_aveTPM10.gtf	exon	31688633	31688733	.	+	.	gene_id "A5:chr4H:31688747-31688835:31688733-31688835:+"; transcript_id "A5:chr4H:31688747-31688835:31688733-31688835:+:alternative2";
chr4H	PanBaRT20_trans_aveTPM10.gtf	exon	31688835	31688935	.	+	.	gene_id "A5:chr4H:31688747-31688835:31688733-31688835:+"; transcript_id "A5:chr4H:31688747-31688835:31688733-31688835:+:alternative2";
chr4H	PanBaRT20_trans_aveTPM10.gtf	exon	40571651	40571789	.	+	.	gene_id "A5:chr4H:40571789-40574500:40571751-40574500:+"; transcript_id "A5:chr4H:40571789-40574500:40571751-40574500:+:alternative1";
chr4H	PanBaRT20_trans_aveTPM10.gtf	exon	40574500	40574600	.	+	.	gene_id "A5:chr4H:40571789-40574500:40571751-40574500:+"; transcript_id "A5:chr4H:40571789-40574500:40571751-40574500:+:alternative1";
chr4H	PanBaRT20_trans_aveTPM10.gtf	exon	40571651	40571751	.	+	.	gene_id "A5:chr4H:40571789-40574500:40571751-40574500:+"; transcript_id "A5:chr4H:40571789-40574500:40571751-40574500:+:alternative2";
chr4H	PanBaRT20_trans_aveTPM10.gtf	exon	40574500	40574600	.	+	.	gene_id "A5:chr4H:40571789-40574500:40571751-40574500:+"; transcript_id "A5:chr4H:40571789-40574500:40571751-40574500:+:alternative2";
chr4H	PanBaRT20_trans_aveTPM10.gtf	exon	167086815	167086965	.	+	.	gene_id "A5:chr4H:167086965-167087141:167086915-167087141:+"; transcript_id "A5:chr4H:167086965-167087141:167086915-167087141:+:alternative1";
chr4H	PanBaRT20_trans_aveTPM10.gtf	exon	167087141	167087241	.	+	.	gene_id "A5:chr4H:167086965-167087141:167086915-167087141:+"; transcript_id "A5:chr4H:167086965-167087141:167086915-167087141:+:alternative1";
chr4H	PanBaRT20_trans_aveTPM10.gtf	exon	167086815	167086915	.	+	.	gene_id "A5:chr4H:167086965-167087141:167086915-167087141:+"; transcript_id "A5:chr4H:167086965-167087141:167086915-167087141:+:alternative2";
chr4H	PanBaRT20_trans_aveTPM10.gtf	exon	167087141	167087241	.	+	.	gene_id "A5:chr4H:167086965-167087141:167086915-167087141:+"; transcript_id "A5:chr4H:167086965-167087141:167086915-167087141:+:alternative2";
chr4H	PanBaRT20_trans_aveTPM10.gtf	exon	184824498	184826028	.	+	.	gene_id "A5:chr4H:184826028-184826496:184824598-184826496:+"; transcript_id "A5:chr4H:184826028-184826496:184824598-184826496:+:alternative1";
chr4H	PanBaRT20_trans_aveTPM10.gtf	exon	184826496	184826596	.	+	.	gene_id "A5:chr4H:184826028-184826496:184824598-184826496:+"; transcript_id "A5:chr4H:184826028-184826496:184824598-184826496:+:alternative1";
chr4H	PanBaRT20_trans_aveTPM10.gtf	exon	184824498	184824598	.	+	.	gene_id "A5:chr4H:184826028-184826496:184824598-184826496:+"; transcript_id "A5:chr4H:184826028-184826496:184824598-184826496:+:alternative2";
chr4H	PanBaRT20_trans_aveTPM10.gtf	exon	184826496	184826596	.	+	.	gene_id "A5:chr4H:184826028-184826496:184824598-184826496:+"; transcript_id "A5:chr4H:184826028-184826496:184824598-184826496:+:alternative2";
chr4H	PanBaRT20_trans_aveTPM10.gtf	exon	253313955	253314170	.	+	.	gene_id "A5:chr4H:253314170-253314332:253314055-253314332:+"; transcript_id "A5:chr4H:253314170-253314332:253314055-253314332:+:alternative1";
chr4H	PanBaRT20_trans_aveTPM10.gtf	exon	253314332	253314432	.	+	.	gene_id "A5:chr4H:253314170-253314332:253314055-253314332:+"; transcript_id "A5:chr4H:253314170-253314332:253314055-253314332:+:alternative1";
chr4H	PanBaRT20_trans_aveTPM10.gtf	exon	253313955	253314055	.	+	.	gene_id "A5:chr4H:253314170-253314332:253314055-253314332:+"; transcript_id "A5:chr4H:253314170-253314332:253314055-253314332:+:alternative2";
chr4H	PanBaRT20_trans_aveTPM10.gtf	exon	253314332	253314432	.	+	.	gene_id "A5:chr4H:253314170-253314332:253314055-253314332:+"; transcript_id "A5:chr4H:253314170-253314332:253314055-253314332:+:alternative2";
chr4H	PanBaRT20_trans_aveTPM10.gtf	exon	335188476	335188640	.	+	.	gene_id "A5:chr4H:335188640-335189537:335188576-335189537:+"; transcript_id "A5:chr4H:335188640-335189537:335188576-335189537:+:alternative1";
chr4H	PanBaRT20_trans_aveTPM10.gtf	exon	335189537	335189637	.	+	.	gene_id "A5:chr4H:335188640-335189537:335188576-335189537:+"; transcript_id "A5:chr4H:335188640-335189537:335188576-335189537:+:alternative1";
chr4H	PanBaRT20_trans_aveTPM10.gtf	exon	335188476	335188576	.	+	.	gene_id "A5:chr4H:335188640-335189537:335188576-335189537:+"; transcript_id "A5:chr4H:335188640-335189537:335188576-335189537:+:alternative2";
chr4H	PanBaRT20_trans_aveTPM10.gtf	exon	335189537	335189637	.	+	.	gene_id "A5:chr4H:335188640-335189537:335188576-335189537:+"; transcript_id "A5:chr4H:335188640-335189537:335188576-335189537:+:alternative2";
chr4H	PanBaRT20_trans_aveTPM10.gtf	exon	403909559	403909664	.	+	.	gene_id "A5:chr4H:403909664-403909757:403909659-403909757:+"; transcript_id "A5:chr4H:403909664-403909757:403909659-403909757:+:alternative1";
chr4H	PanBaRT20_trans_aveTPM10.gtf	exon	403909757	403909857	.	+	.	gene_id "A5:chr4H:403909664-403909757:403909659-403909757:+"; transcript_id "A5:chr4H:403909664-403909757:403909659-403909757:+:alternative1";
chr4H	PanBaRT20_trans_aveTPM10.gtf	exon	403909559	403909659	.	+	.	gene_id "A5:chr4H:403909664-403909757:403909659-403909757:+"; transcript_id "A5:chr4H:403909664-403909757:403909659-403909757:+:alternative2";
chr4H	PanBaRT20_trans_aveTPM10.gtf	exon	403909757	403909857	.	+	.	gene_id "A5:chr4H:403909664-403909757:403909659-403909757:+"; transcript_id "A5:chr4H:403909664-403909757:403909659-403909757:+:alternative2";
chr4H	PanBaRT20_trans_aveTPM10.gtf	exon	465767980	465768104	.	+	.	gene_id "A5:chr4H:465768104-465768229:465768080-465768229:+"; transcript_id "A5:chr4H:465768104-465768229:465768080-465768229:+:alternative1";
chr4H	PanBaRT20_trans_aveTPM10.gtf	exon	465768229	465768329	.	+	.	gene_id "A5:chr4H:465768104-465768229:465768080-465768229:+"; transcript_id "A5:chr4H:465768104-465768229:465768080-465768229:+:alternative1";
chr4H	PanBaRT20_trans_aveTPM10.gtf	exon	465767980	465768080	.	+	.	gene_id "A5:chr4H:465768104-465768229:465768080-465768229:+"; transcript_id "A5:chr4H:465768104-465768229:465768080-465768229:+:alternative2";
chr4H	PanBaRT20_trans_aveTPM10.gtf	exon	465768229	465768329	.	+	.	gene_id "A5:chr4H:465768104-465768229:465768080-465768229:+"; transcript_id "A5:chr4H:465768104-465768229:465768080-465768229:+:alternative2";
chr4H	PanBaRT20_trans_aveTPM10.gtf	exon	465767980	465768141	.	+	.	gene_id "A5:chr4H:465768141-465768229:465768080-465768229:+"; transcript_id "A5:chr4H:465768141-465768229:465768080-465768229:+:alternative1";
chr4H	PanBaRT20_trans_aveTPM10.gtf	exon	465768229	465768329	.	+	.	gene_id "A5:chr4H:465768141-465768229:465768080-465768229:+"; transcript_id "A5:chr4H:465768141-465768229:465768080-465768229:+:alternative1";
chr4H	PanBaRT20_trans_aveTPM10.gtf	exon	465767980	465768080	.	+	.	gene_id "A5:chr4H:465768141-465768229:465768080-465768229:+"; transcript_id "A5:chr4H:465768141-465768229:465768080-465768229:+:alternative2";
chr4H	PanBaRT20_trans_aveTPM10.gtf	exon	465768229	465768329	.	+	.	gene_id "A5:chr4H:465768141-465768229:465768080-465768229:+"; transcript_id "A5:chr4H:465768141-465768229:465768080-465768229:+:alternative2";
chr4H	PanBaRT20_trans_aveTPM10.gtf	exon	465768004	465768141	.	+	.	gene_id "A5:chr4H:465768141-465768229:465768104-465768229:+"; transcript_id "A5:chr4H:465768141-465768229:465768104-465768229:+:alternative1";
chr4H	PanBaRT20_trans_aveTPM10.gtf	exon	465768229	465768329	.	+	.	gene_id "A5:chr4H:465768141-465768229:465768104-465768229:+"; transcript_id "A5:chr4H:465768141-465768229:465768104-465768229:+:alternative1";
chr4H	PanBaRT20_trans_aveTPM10.gtf	exon	465768004	465768104	.	+	.	gene_id "A5:chr4H:465768141-465768229:465768104-465768229:+"; transcript_id "A5:chr4H:465768141-465768229:465768104-465768229:+:alternative2";
chr4H	PanBaRT20_trans_aveTPM10.gtf	exon	465768229	465768329	.	+	.	gene_id "A5:chr4H:465768141-465768229:465768104-465768229:+"; transcript_id "A5:chr4H:465768141-465768229:465768104-465768229:+:alternative2";
chr4H	PanBaRT20_trans_aveTPM10.gtf	exon	481747421	481747547	.	+	.	gene_id "A5:chr4H:481747547-481747631:481747521-481747631:+"; transcript_id "A5:chr4H:481747547-481747631:481747521-481747631:+:alternative1";
chr4H	PanBaRT20_trans_aveTPM10.gtf	exon	481747631	481747731	.	+	.	gene_id "A5:chr4H:481747547-481747631:481747521-481747631:+"; transcript_id "A5:chr4H:481747547-481747631:481747521-481747631:+:alternative1";
chr4H	PanBaRT20_trans_aveTPM10.gtf	exon	481747421	481747521	.	+	.	gene_id "A5:chr4H:481747547-481747631:481747521-481747631:+"; transcript_id "A5:chr4H:481747547-481747631:481747521-481747631:+:alternative2";
chr4H	PanBaRT20_trans_aveTPM10.gtf	exon	481747631	481747731	.	+	.	gene_id "A5:chr4H:481747547-481747631:481747521-481747631:+"; transcript_id "A5:chr4H:481747547-481747631:481747521-481747631:+:alternative2";
chr4H	PanBaRT20_trans_aveTPM10.gtf	exon	543148949	543149054	.	+	.	gene_id "A5:chr4H:543149054-543149105:543149049-543149105:+"; transcript_id "A5:chr4H:543149054-543149105:543149049-543149105:+:alternative1";
chr4H	PanBaRT20_trans_aveTPM10.gtf	exon	543149105	543149205	.	+	.	gene_id "A5:chr4H:543149054-543149105:543149049-543149105:+"; transcript_id "A5:chr4H:543149054-543149105:543149049-543149105:+:alternative1";
chr4H	PanBaRT20_trans_aveTPM10.gtf	exon	543148949	543149049	.	+	.	gene_id "A5:chr4H:543149054-543149105:543149049-543149105:+"; transcript_id "A5:chr4H:543149054-543149105:543149049-543149105:+:alternative2";
chr4H	PanBaRT20_trans_aveTPM10.gtf	exon	543149105	543149205	.	+	.	gene_id "A5:chr4H:543149054-543149105:543149049-543149105:+"; transcript_id "A5:chr4H:543149054-543149105:543149049-543149105:+:alternative2";
chr4H	PanBaRT20_trans_aveTPM10.gtf	exon	557305377	557305480	.	+	.	gene_id "A5:chr4H:557305480-557305605:557305477-557305605:+"; transcript_id "A5:chr4H:557305480-557305605:557305477-557305605:+:alternative1";
chr4H	PanBaRT20_trans_aveTPM10.gtf	exon	557305605	557305705	.	+	.	gene_id "A5:chr4H:557305480-557305605:557305477-557305605:+"; transcript_id "A5:chr4H:557305480-557305605:557305477-557305605:+:alternative1";
chr4H	PanBaRT20_trans_aveTPM10.gtf	exon	557305377	557305477	.	+	.	gene_id "A5:chr4H:557305480-557305605:557305477-557305605:+"; transcript_id "A5:chr4H:557305480-557305605:557305477-557305605:+:alternative2";
chr4H	PanBaRT20_trans_aveTPM10.gtf	exon	557305605	557305705	.	+	.	gene_id "A5:chr4H:557305480-557305605:557305477-557305605:+"; transcript_id "A5:chr4H:557305480-557305605:557305477-557305605:+:alternative2";
chr4H	PanBaRT20_trans_aveTPM10.gtf	exon	598849067	598849348	.	+	.	gene_id "A5:chr4H:598849348-598849750:598849167-598849750:+"; transcript_id "A5:chr4H:598849348-598849750:598849167-598849750:+:alternative1";
chr4H	PanBaRT20_trans_aveTPM10.gtf	exon	598849750	598849850	.	+	.	gene_id "A5:chr4H:598849348-598849750:598849167-598849750:+"; transcript_id "A5:chr4H:598849348-598849750:598849167-598849750:+:alternative1";
chr4H	PanBaRT20_trans_aveTPM10.gtf	exon	598849067	598849167	.	+	.	gene_id "A5:chr4H:598849348-598849750:598849167-598849750:+"; transcript_id "A5:chr4H:598849348-598849750:598849167-598849750:+:alternative2";
chr4H	PanBaRT20_trans_aveTPM10.gtf	exon	598849750	598849850	.	+	.	gene_id "A5:chr4H:598849348-598849750:598849167-598849750:+"; transcript_id "A5:chr4H:598849348-598849750:598849167-598849750:+:alternative2";
chr4H	PanBaRT20_trans_aveTPM10.gtf	exon	616157299	616157614	.	+	.	gene_id "A5:chr4H:616157614-616157728:616157399-616157728:+"; transcript_id "A5:chr4H:616157614-616157728:616157399-616157728:+:alternative1";
chr4H	PanBaRT20_trans_aveTPM10.gtf	exon	616157728	616157828	.	+	.	gene_id "A5:chr4H:616157614-616157728:616157399-616157728:+"; transcript_id "A5:chr4H:616157614-616157728:616157399-616157728:+:alternative1";
chr4H	PanBaRT20_trans_aveTPM10.gtf	exon	616157299	616157399	.	+	.	gene_id "A5:chr4H:616157614-616157728:616157399-616157728:+"; transcript_id "A5:chr4H:616157614-616157728:616157399-616157728:+:alternative2";
chr4H	PanBaRT20_trans_aveTPM10.gtf	exon	616157728	616157828	.	+	.	gene_id "A5:chr4H:616157614-616157728:616157399-616157728:+"; transcript_id "A5:chr4H:616157614-616157728:616157399-616157728:+:alternative2";
chr4H	PanBaRT20_trans_aveTPM10.gtf	exon	628566826	628567038	.	+	.	gene_id "A5:chr4H:628567038-628567144:628566926-628567144:+"; transcript_id "A5:chr4H:628567038-628567144:628566926-628567144:+:alternative1";
chr4H	PanBaRT20_trans_aveTPM10.gtf	exon	628567144	628567244	.	+	.	gene_id "A5:chr4H:628567038-628567144:628566926-628567144:+"; transcript_id "A5:chr4H:628567038-628567144:628566926-628567144:+:alternative1";
chr4H	PanBaRT20_trans_aveTPM10.gtf	exon	628566826	628566926	.	+	.	gene_id "A5:chr4H:628567038-628567144:628566926-628567144:+"; transcript_id "A5:chr4H:628567038-628567144:628566926-628567144:+:alternative2";
chr4H	PanBaRT20_trans_aveTPM10.gtf	exon	628567144	628567244	.	+	.	gene_id "A5:chr4H:628567038-628567144:628566926-628567144:+"; transcript_id "A5:chr4H:628567038-628567144:628566926-628567144:+:alternative2";
chr4H	PanBaRT20_trans_aveTPM10.gtf	exon	637455792	637455908	.	+	.	gene_id "A5:chr4H:637455908-637455953:637455892-637455953:+"; transcript_id "A5:chr4H:637455908-637455953:637455892-637455953:+:alternative1";
chr4H	PanBaRT20_trans_aveTPM10.gtf	exon	637455953	637456053	.	+	.	gene_id "A5:chr4H:637455908-637455953:637455892-637455953:+"; transcript_id "A5:chr4H:637455908-637455953:637455892-637455953:+:alternative1";
chr4H	PanBaRT20_trans_aveTPM10.gtf	exon	637455792	637455892	.	+	.	gene_id "A5:chr4H:637455908-637455953:637455892-637455953:+"; transcript_id "A5:chr4H:637455908-637455953:637455892-637455953:+:alternative2";
chr4H	PanBaRT20_trans_aveTPM10.gtf	exon	637455953	637456053	.	+	.	gene_id "A5:chr4H:637455908-637455953:637455892-637455953:+"; transcript_id "A5:chr4H:637455908-637455953:637455892-637455953:+:alternative2";
chr4H	PanBaRT20_trans_aveTPM10.gtf	exon	648834705	648834809	.	+	.	gene_id "A5:chr4H:648834809-648834984:648834805-648834984:+"; transcript_id "A5:chr4H:648834809-648834984:648834805-648834984:+:alternative1";
chr4H	PanBaRT20_trans_aveTPM10.gtf	exon	648834984	648835084	.	+	.	gene_id "A5:chr4H:648834809-648834984:648834805-648834984:+"; transcript_id "A5:chr4H:648834809-648834984:648834805-648834984:+:alternative1";
chr4H	PanBaRT20_trans_aveTPM10.gtf	exon	648834705	648834805	.	+	.	gene_id "A5:chr4H:648834809-648834984:648834805-648834984:+"; transcript_id "A5:chr4H:648834809-648834984:648834805-648834984:+:alternative2";
chr4H	PanBaRT20_trans_aveTPM10.gtf	exon	648834984	648835084	.	+	.	gene_id "A5:chr4H:648834809-648834984:648834805-648834984:+"; transcript_id "A5:chr4H:648834809-648834984:648834805-648834984:+:alternative2";
chr5H	PanBaRT20_trans_aveTPM10.gtf	exon	2818692	2818792	.	-	.	gene_id "A5:chr5H:2818792-2818876:2818792-2818893:-"; transcript_id "A5:chr5H:2818792-2818876:2818792-2818893:-:alternative1";
chr5H	PanBaRT20_trans_aveTPM10.gtf	exon	2818876	2818993	.	-	.	gene_id "A5:chr5H:2818792-2818876:2818792-2818893:-"; transcript_id "A5:chr5H:2818792-2818876:2818792-2818893:-:alternative1";
chr5H	PanBaRT20_trans_aveTPM10.gtf	exon	2818692	2818792	.	-	.	gene_id "A5:chr5H:2818792-2818876:2818792-2818893:-"; transcript_id "A5:chr5H:2818792-2818876:2818792-2818893:-:alternative2";
chr5H	PanBaRT20_trans_aveTPM10.gtf	exon	2818893	2818993	.	-	.	gene_id "A5:chr5H:2818792-2818876:2818792-2818893:-"; transcript_id "A5:chr5H:2818792-2818876:2818792-2818893:-:alternative2";
chr5H	PanBaRT20_trans_aveTPM10.gtf	exon	10865282	10865382	.	-	.	gene_id "A5:chr5H:10865382-10865653:10865382-10865657:-"; transcript_id "A5:chr5H:10865382-10865653:10865382-10865657:-:alternative1";
chr5H	PanBaRT20_trans_aveTPM10.gtf	exon	10865653	10865757	.	-	.	gene_id "A5:chr5H:10865382-10865653:10865382-10865657:-"; transcript_id "A5:chr5H:10865382-10865653:10865382-10865657:-:alternative1";
chr5H	PanBaRT20_trans_aveTPM10.gtf	exon	10865282	10865382	.	-	.	gene_id "A5:chr5H:10865382-10865653:10865382-10865657:-"; transcript_id "A5:chr5H:10865382-10865653:10865382-10865657:-:alternative2";
chr5H	PanBaRT20_trans_aveTPM10.gtf	exon	10865657	10865757	.	-	.	gene_id "A5:chr5H:10865382-10865653:10865382-10865657:-"; transcript_id "A5:chr5H:10865382-10865653:10865382-10865657:-:alternative2";
chr5H	PanBaRT20_trans_aveTPM10.gtf	exon	37717306	37717406	.	-	.	gene_id "A5:chr5H:37717406-37717481:37717406-37717544:-"; transcript_id "A5:chr5H:37717406-37717481:37717406-37717544:-:alternative1";
chr5H	PanBaRT20_trans_aveTPM10.gtf	exon	37717481	37717644	.	-	.	gene_id "A5:chr5H:37717406-37717481:37717406-37717544:-"; transcript_id "A5:chr5H:37717406-37717481:37717406-37717544:-:alternative1";
chr5H	PanBaRT20_trans_aveTPM10.gtf	exon	37717306	37717406	.	-	.	gene_id "A5:chr5H:37717406-37717481:37717406-37717544:-"; transcript_id "A5:chr5H:37717406-37717481:37717406-37717544:-:alternative2";
chr5H	PanBaRT20_trans_aveTPM10.gtf	exon	37717544	37717644	.	-	.	gene_id "A5:chr5H:37717406-37717481:37717406-37717544:-"; transcript_id "A5:chr5H:37717406-37717481:37717406-37717544:-:alternative2";
chr5H	PanBaRT20_trans_aveTPM10.gtf	exon	41892835	41892935	.	-	.	gene_id "A5:chr5H:41892935-41893501:41892935-41893504:-"; transcript_id "A5:chr5H:41892935-41893501:41892935-41893504:-:alternative1";
chr5H	PanBaRT20_trans_aveTPM10.gtf	exon	41893501	41893604	.	-	.	gene_id "A5:chr5H:41892935-41893501:41892935-41893504:-"; transcript_id "A5:chr5H:41892935-41893501:41892935-41893504:-:alternative1";
chr5H	PanBaRT20_trans_aveTPM10.gtf	exon	41892835	41892935	.	-	.	gene_id "A5:chr5H:41892935-41893501:41892935-41893504:-"; transcript_id "A5:chr5H:41892935-41893501:41892935-41893504:-:alternative2";
chr5H	PanBaRT20_trans_aveTPM10.gtf	exon	41893504	41893604	.	-	.	gene_id "A5:chr5H:41892935-41893501:41892935-41893504:-"; transcript_id "A5:chr5H:41892935-41893501:41892935-41893504:-:alternative2";
chr5H	PanBaRT20_trans_aveTPM10.gtf	exon	207397811	207397911	.	-	.	gene_id "A5:chr5H:207397911-207399080:207397911-207399825:-"; transcript_id "A5:chr5H:207397911-207399080:207397911-207399825:-:alternative1";
chr5H	PanBaRT20_trans_aveTPM10.gtf	exon	207399080	207399925	.	-	.	gene_id "A5:chr5H:207397911-207399080:207397911-207399825:-"; transcript_id "A5:chr5H:207397911-207399080:207397911-207399825:-:alternative1";
chr5H	PanBaRT20_trans_aveTPM10.gtf	exon	207397811	207397911	.	-	.	gene_id "A5:chr5H:207397911-207399080:207397911-207399825:-"; transcript_id "A5:chr5H:207397911-207399080:207397911-207399825:-:alternative2";
chr5H	PanBaRT20_trans_aveTPM10.gtf	exon	207399825	207399925	.	-	.	gene_id "A5:chr5H:207397911-207399080:207397911-207399825:-"; transcript_id "A5:chr5H:207397911-207399080:207397911-207399825:-:alternative2";
chr5H	PanBaRT20_trans_aveTPM10.gtf	exon	330431425	330431525	.	-	.	gene_id "A5:chr5H:330431525-330432828:330431525-330432832:-"; transcript_id "A5:chr5H:330431525-330432828:330431525-330432832:-:alternative1";
chr5H	PanBaRT20_trans_aveTPM10.gtf	exon	330432828	330432932	.	-	.	gene_id "A5:chr5H:330431525-330432828:330431525-330432832:-"; transcript_id "A5:chr5H:330431525-330432828:330431525-330432832:-:alternative1";
chr5H	PanBaRT20_trans_aveTPM10.gtf	exon	330431425	330431525	.	-	.	gene_id "A5:chr5H:330431525-330432828:330431525-330432832:-"; transcript_id "A5:chr5H:330431525-330432828:330431525-330432832:-:alternative2";
chr5H	PanBaRT20_trans_aveTPM10.gtf	exon	330432832	330432932	.	-	.	gene_id "A5:chr5H:330431525-330432828:330431525-330432832:-"; transcript_id "A5:chr5H:330431525-330432828:330431525-330432832:-:alternative2";
chr5H	PanBaRT20_trans_aveTPM10.gtf	exon	399388654	399388754	.	-	.	gene_id "A5:chr5H:399388754-399388827:399388754-399388839:-"; transcript_id "A5:chr5H:399388754-399388827:399388754-399388839:-:alternative1";
chr5H	PanBaRT20_trans_aveTPM10.gtf	exon	399388827	399388939	.	-	.	gene_id "A5:chr5H:399388754-399388827:399388754-399388839:-"; transcript_id "A5:chr5H:399388754-399388827:399388754-399388839:-:alternative1";
chr5H	PanBaRT20_trans_aveTPM10.gtf	exon	399388654	399388754	.	-	.	gene_id "A5:chr5H:399388754-399388827:399388754-399388839:-"; transcript_id "A5:chr5H:399388754-399388827:399388754-399388839:-:alternative2";
chr5H	PanBaRT20_trans_aveTPM10.gtf	exon	399388839	399388939	.	-	.	gene_id "A5:chr5H:399388754-399388827:399388754-399388839:-"; transcript_id "A5:chr5H:399388754-399388827:399388754-399388839:-:alternative2";
chr5H	PanBaRT20_trans_aveTPM10.gtf	exon	589375898	589375998	.	-	.	gene_id "A5:chr5H:589375998-589376617:589375998-589376789:-"; transcript_id "A5:chr5H:589375998-589376617:589375998-589376789:-:alternative1";
chr5H	PanBaRT20_trans_aveTPM10.gtf	exon	589376617	589376889	.	-	.	gene_id "A5:chr5H:589375998-589376617:589375998-589376789:-"; transcript_id "A5:chr5H:589375998-589376617:589375998-589376789:-:alternative1";
chr5H	PanBaRT20_trans_aveTPM10.gtf	exon	589375898	589375998	.	-	.	gene_id "A5:chr5H:589375998-589376617:589375998-589376789:-"; transcript_id "A5:chr5H:589375998-589376617:589375998-589376789:-:alternative2";
chr5H	PanBaRT20_trans_aveTPM10.gtf	exon	589376789	589376889	.	-	.	gene_id "A5:chr5H:589375998-589376617:589375998-589376789:-"; transcript_id "A5:chr5H:589375998-589376617:589375998-589376789:-:alternative2";
chr5H	PanBaRT20_trans_aveTPM10.gtf	exon	590455176	590455276	.	-	.	gene_id "A5:chr5H:590455276-590455385:590455276-590456082:-"; transcript_id "A5:chr5H:590455276-590455385:590455276-590456082:-:alternative1";
chr5H	PanBaRT20_trans_aveTPM10.gtf	exon	590455385	590456182	.	-	.	gene_id "A5:chr5H:590455276-590455385:590455276-590456082:-"; transcript_id "A5:chr5H:590455276-590455385:590455276-590456082:-:alternative1";
chr5H	PanBaRT20_trans_aveTPM10.gtf	exon	590455176	590455276	.	-	.	gene_id "A5:chr5H:590455276-590455385:590455276-590456082:-"; transcript_id "A5:chr5H:590455276-590455385:590455276-590456082:-:alternative2";
chr5H	PanBaRT20_trans_aveTPM10.gtf	exon	590456082	590456182	.	-	.	gene_id "A5:chr5H:590455276-590455385:590455276-590456082:-"; transcript_id "A5:chr5H:590455276-590455385:590455276-590456082:-:alternative2";
chr5H	PanBaRT20_trans_aveTPM10.gtf	exon	626975942	626976042	.	-	.	gene_id "A5:chr5H:626976042-626976122:626976042-626976125:-"; transcript_id "A5:chr5H:626976042-626976122:626976042-626976125:-:alternative1";
chr5H	PanBaRT20_trans_aveTPM10.gtf	exon	626976122	626976225	.	-	.	gene_id "A5:chr5H:626976042-626976122:626976042-626976125:-"; transcript_id "A5:chr5H:626976042-626976122:626976042-626976125:-:alternative1";
chr5H	PanBaRT20_trans_aveTPM10.gtf	exon	626975942	626976042	.	-	.	gene_id "A5:chr5H:626976042-626976122:626976042-626976125:-"; transcript_id "A5:chr5H:626976042-626976122:626976042-626976125:-:alternative2";
chr5H	PanBaRT20_trans_aveTPM10.gtf	exon	626976125	626976225	.	-	.	gene_id "A5:chr5H:626976042-626976122:626976042-626976125:-"; transcript_id "A5:chr5H:626976042-626976122:626976042-626976125:-:alternative2";
chr5H	PanBaRT20_trans_aveTPM10.gtf	exon	630157963	630158063	.	-	.	gene_id "A5:chr5H:630158063-630158156:630158063-630158162:-"; transcript_id "A5:chr5H:630158063-630158156:630158063-630158162:-:alternative1";
chr5H	PanBaRT20_trans_aveTPM10.gtf	exon	630158156	630158262	.	-	.	gene_id "A5:chr5H:630158063-630158156:630158063-630158162:-"; transcript_id "A5:chr5H:630158063-630158156:630158063-630158162:-:alternative1";
chr5H	PanBaRT20_trans_aveTPM10.gtf	exon	630157963	630158063	.	-	.	gene_id "A5:chr5H:630158063-630158156:630158063-630158162:-"; transcript_id "A5:chr5H:630158063-630158156:630158063-630158162:-:alternative2";
chr5H	PanBaRT20_trans_aveTPM10.gtf	exon	630158162	630158262	.	-	.	gene_id "A5:chr5H:630158063-630158156:630158063-630158162:-"; transcript_id "A5:chr5H:630158063-630158156:630158063-630158162:-:alternative2";
chr5H	PanBaRT20_trans_aveTPM10.gtf	exon	28230943	28231097	.	+	.	gene_id "A5:chr5H:28231097-28231148:28231043-28231148:+"; transcript_id "A5:chr5H:28231097-28231148:28231043-28231148:+:alternative1";
chr5H	PanBaRT20_trans_aveTPM10.gtf	exon	28231148	28231248	.	+	.	gene_id "A5:chr5H:28231097-28231148:28231043-28231148:+"; transcript_id "A5:chr5H:28231097-28231148:28231043-28231148:+:alternative1";
chr5H	PanBaRT20_trans_aveTPM10.gtf	exon	28230943	28231043	.	+	.	gene_id "A5:chr5H:28231097-28231148:28231043-28231148:+"; transcript_id "A5:chr5H:28231097-28231148:28231043-28231148:+:alternative2";
chr5H	PanBaRT20_trans_aveTPM10.gtf	exon	28231148	28231248	.	+	.	gene_id "A5:chr5H:28231097-28231148:28231043-28231148:+"; transcript_id "A5:chr5H:28231097-28231148:28231043-28231148:+:alternative2";
chr5H	PanBaRT20_trans_aveTPM10.gtf	exon	156789481	156789885	.	+	.	gene_id "A5:chr5H:156789885-156790014:156789581-156790014:+"; transcript_id "A5:chr5H:156789885-156790014:156789581-156790014:+:alternative1";
chr5H	PanBaRT20_trans_aveTPM10.gtf	exon	156790014	156790114	.	+	.	gene_id "A5:chr5H:156789885-156790014:156789581-156790014:+"; transcript_id "A5:chr5H:156789885-156790014:156789581-156790014:+:alternative1";
chr5H	PanBaRT20_trans_aveTPM10.gtf	exon	156789481	156789581	.	+	.	gene_id "A5:chr5H:156789885-156790014:156789581-156790014:+"; transcript_id "A5:chr5H:156789885-156790014:156789581-156790014:+:alternative2";
chr5H	PanBaRT20_trans_aveTPM10.gtf	exon	156790014	156790114	.	+	.	gene_id "A5:chr5H:156789885-156790014:156789581-156790014:+"; transcript_id "A5:chr5H:156789885-156790014:156789581-156790014:+:alternative2";
chr5H	PanBaRT20_trans_aveTPM10.gtf	exon	329376887	329376990	.	+	.	gene_id "A5:chr5H:329376990-329377085:329376987-329377085:+"; transcript_id "A5:chr5H:329376990-329377085:329376987-329377085:+:alternative1";
chr5H	PanBaRT20_trans_aveTPM10.gtf	exon	329377085	329377185	.	+	.	gene_id "A5:chr5H:329376990-329377085:329376987-329377085:+"; transcript_id "A5:chr5H:329376990-329377085:329376987-329377085:+:alternative1";
chr5H	PanBaRT20_trans_aveTPM10.gtf	exon	329376887	329376987	.	+	.	gene_id "A5:chr5H:329376990-329377085:329376987-329377085:+"; transcript_id "A5:chr5H:329376990-329377085:329376987-329377085:+:alternative2";
chr5H	PanBaRT20_trans_aveTPM10.gtf	exon	329377085	329377185	.	+	.	gene_id "A5:chr5H:329376990-329377085:329376987-329377085:+"; transcript_id "A5:chr5H:329376990-329377085:329376987-329377085:+:alternative2";
chr5H	PanBaRT20_trans_aveTPM10.gtf	exon	356124522	356125208	.	+	.	gene_id "A5:chr5H:356125208-356125939:356124622-356125939:+"; transcript_id "A5:chr5H:356125208-356125939:356124622-356125939:+:alternative1";
chr5H	PanBaRT20_trans_aveTPM10.gtf	exon	356125939	356126039	.	+	.	gene_id "A5:chr5H:356125208-356125939:356124622-356125939:+"; transcript_id "A5:chr5H:356125208-356125939:356124622-356125939:+:alternative1";
chr5H	PanBaRT20_trans_aveTPM10.gtf	exon	356124522	356124622	.	+	.	gene_id "A5:chr5H:356125208-356125939:356124622-356125939:+"; transcript_id "A5:chr5H:356125208-356125939:356124622-356125939:+:alternative2";
chr5H	PanBaRT20_trans_aveTPM10.gtf	exon	356125939	356126039	.	+	.	gene_id "A5:chr5H:356125208-356125939:356124622-356125939:+"; transcript_id "A5:chr5H:356125208-356125939:356124622-356125939:+:alternative2";
chr5H	PanBaRT20_trans_aveTPM10.gtf	exon	486169518	486169635	.	+	.	gene_id "A5:chr5H:486169635-486169743:486169618-486169743:+"; transcript_id "A5:chr5H:486169635-486169743:486169618-486169743:+:alternative1";
chr5H	PanBaRT20_trans_aveTPM10.gtf	exon	486169743	486169843	.	+	.	gene_id "A5:chr5H:486169635-486169743:486169618-486169743:+"; transcript_id "A5:chr5H:486169635-486169743:486169618-486169743:+:alternative1";
chr5H	PanBaRT20_trans_aveTPM10.gtf	exon	486169518	486169618	.	+	.	gene_id "A5:chr5H:486169635-486169743:486169618-486169743:+"; transcript_id "A5:chr5H:486169635-486169743:486169618-486169743:+:alternative2";
chr5H	PanBaRT20_trans_aveTPM10.gtf	exon	486169743	486169843	.	+	.	gene_id "A5:chr5H:486169635-486169743:486169618-486169743:+"; transcript_id "A5:chr5H:486169635-486169743:486169618-486169743:+:alternative2";
chr5H	PanBaRT20_trans_aveTPM10.gtf	exon	520252566	520252668	.	+	.	gene_id "A5:chr5H:520252668-520252788:520252666-520252788:+"; transcript_id "A5:chr5H:520252668-520252788:520252666-520252788:+:alternative1";
chr5H	PanBaRT20_trans_aveTPM10.gtf	exon	520252788	520252888	.	+	.	gene_id "A5:chr5H:520252668-520252788:520252666-520252788:+"; transcript_id "A5:chr5H:520252668-520252788:520252666-520252788:+:alternative1";
chr5H	PanBaRT20_trans_aveTPM10.gtf	exon	520252566	520252666	.	+	.	gene_id "A5:chr5H:520252668-520252788:520252666-520252788:+"; transcript_id "A5:chr5H:520252668-520252788:520252666-520252788:+:alternative2";
chr5H	PanBaRT20_trans_aveTPM10.gtf	exon	520252788	520252888	.	+	.	gene_id "A5:chr5H:520252668-520252788:520252666-520252788:+"; transcript_id "A5:chr5H:520252668-520252788:520252666-520252788:+:alternative2";
chr5H	PanBaRT20_trans_aveTPM10.gtf	exon	524329497	524329615	.	+	.	gene_id "A5:chr5H:524329615-524329710:524329597-524329710:+"; transcript_id "A5:chr5H:524329615-524329710:524329597-524329710:+:alternative1";
chr5H	PanBaRT20_trans_aveTPM10.gtf	exon	524329710	524329810	.	+	.	gene_id "A5:chr5H:524329615-524329710:524329597-524329710:+"; transcript_id "A5:chr5H:524329615-524329710:524329597-524329710:+:alternative1";
chr5H	PanBaRT20_trans_aveTPM10.gtf	exon	524329497	524329597	.	+	.	gene_id "A5:chr5H:524329615-524329710:524329597-524329710:+"; transcript_id "A5:chr5H:524329615-524329710:524329597-524329710:+:alternative2";
chr5H	PanBaRT20_trans_aveTPM10.gtf	exon	524329710	524329810	.	+	.	gene_id "A5:chr5H:524329615-524329710:524329597-524329710:+"; transcript_id "A5:chr5H:524329615-524329710:524329597-524329710:+:alternative2";
chr5H	PanBaRT20_trans_aveTPM10.gtf	exon	535749837	535749957	.	+	.	gene_id "A5:chr5H:535749957-535750078:535749937-535750078:+"; transcript_id "A5:chr5H:535749957-535750078:535749937-535750078:+:alternative1";
chr5H	PanBaRT20_trans_aveTPM10.gtf	exon	535750078	535750178	.	+	.	gene_id "A5:chr5H:535749957-535750078:535749937-535750078:+"; transcript_id "A5:chr5H:535749957-535750078:535749937-535750078:+:alternative1";
chr5H	PanBaRT20_trans_aveTPM10.gtf	exon	535749837	535749937	.	+	.	gene_id "A5:chr5H:535749957-535750078:535749937-535750078:+"; transcript_id "A5:chr5H:535749957-535750078:535749937-535750078:+:alternative2";
chr5H	PanBaRT20_trans_aveTPM10.gtf	exon	535750078	535750178	.	+	.	gene_id "A5:chr5H:535749957-535750078:535749937-535750078:+"; transcript_id "A5:chr5H:535749957-535750078:535749937-535750078:+:alternative2";
chr5H	PanBaRT20_trans_aveTPM10.gtf	exon	557058917	557059059	.	+	.	gene_id "A5:chr5H:557059059-557059153:557059017-557059153:+"; transcript_id "A5:chr5H:557059059-557059153:557059017-557059153:+:alternative1";
chr5H	PanBaRT20_trans_aveTPM10.gtf	exon	557059153	557059253	.	+	.	gene_id "A5:chr5H:557059059-557059153:557059017-557059153:+"; transcript_id "A5:chr5H:557059059-557059153:557059017-557059153:+:alternative1";
chr5H	PanBaRT20_trans_aveTPM10.gtf	exon	557058917	557059017	.	+	.	gene_id "A5:chr5H:557059059-557059153:557059017-557059153:+"; transcript_id "A5:chr5H:557059059-557059153:557059017-557059153:+:alternative2";
chr5H	PanBaRT20_trans_aveTPM10.gtf	exon	557059153	557059253	.	+	.	gene_id "A5:chr5H:557059059-557059153:557059017-557059153:+"; transcript_id "A5:chr5H:557059059-557059153:557059017-557059153:+:alternative2";
chr5H	PanBaRT20_trans_aveTPM10.gtf	exon	567775006	567775111	.	+	.	gene_id "A5:chr5H:567775111-567775206:567775106-567775206:+"; transcript_id "A5:chr5H:567775111-567775206:567775106-567775206:+:alternative1";
chr5H	PanBaRT20_trans_aveTPM10.gtf	exon	567775206	567775306	.	+	.	gene_id "A5:chr5H:567775111-567775206:567775106-567775206:+"; transcript_id "A5:chr5H:567775111-567775206:567775106-567775206:+:alternative1";
chr5H	PanBaRT20_trans_aveTPM10.gtf	exon	567775006	567775106	.	+	.	gene_id "A5:chr5H:567775111-567775206:567775106-567775206:+"; transcript_id "A5:chr5H:567775111-567775206:567775106-567775206:+:alternative2";
chr5H	PanBaRT20_trans_aveTPM10.gtf	exon	567775206	567775306	.	+	.	gene_id "A5:chr5H:567775111-567775206:567775106-567775206:+"; transcript_id "A5:chr5H:567775111-567775206:567775106-567775206:+:alternative2";
chr5H	PanBaRT20_trans_aveTPM10.gtf	exon	575162148	575162450	.	+	.	gene_id "A5:chr5H:575162450-575164007:575162248-575164007:+"; transcript_id "A5:chr5H:575162450-575164007:575162248-575164007:+:alternative1";
chr5H	PanBaRT20_trans_aveTPM10.gtf	exon	575164007	575164107	.	+	.	gene_id "A5:chr5H:575162450-575164007:575162248-575164007:+"; transcript_id "A5:chr5H:575162450-575164007:575162248-575164007:+:alternative1";
chr5H	PanBaRT20_trans_aveTPM10.gtf	exon	575162148	575162248	.	+	.	gene_id "A5:chr5H:575162450-575164007:575162248-575164007:+"; transcript_id "A5:chr5H:575162450-575164007:575162248-575164007:+:alternative2";
chr5H	PanBaRT20_trans_aveTPM10.gtf	exon	575164007	575164107	.	+	.	gene_id "A5:chr5H:575162450-575164007:575162248-575164007:+"; transcript_id "A5:chr5H:575162450-575164007:575162248-575164007:+:alternative2";
chr5H	PanBaRT20_trans_aveTPM10.gtf	exon	639437842	639437980	.	+	.	gene_id "A5:chr5H:639437980-639439201:639437942-639439201:+"; transcript_id "A5:chr5H:639437980-639439201:639437942-639439201:+:alternative1";
chr5H	PanBaRT20_trans_aveTPM10.gtf	exon	639439201	639439301	.	+	.	gene_id "A5:chr5H:639437980-639439201:639437942-639439201:+"; transcript_id "A5:chr5H:639437980-639439201:639437942-639439201:+:alternative1";
chr5H	PanBaRT20_trans_aveTPM10.gtf	exon	639437842	639437942	.	+	.	gene_id "A5:chr5H:639437980-639439201:639437942-639439201:+"; transcript_id "A5:chr5H:639437980-639439201:639437942-639439201:+:alternative2";
chr5H	PanBaRT20_trans_aveTPM10.gtf	exon	639439201	639439301	.	+	.	gene_id "A5:chr5H:639437980-639439201:639437942-639439201:+"; transcript_id "A5:chr5H:639437980-639439201:639437942-639439201:+:alternative2";
chr6H	PanBaRT20_trans_aveTPM10.gtf	exon	194387681	194387781	.	-	.	gene_id "A5:chr6H:194387781-194388388:194387781-194388436:-"; transcript_id "A5:chr6H:194387781-194388388:194387781-194388436:-:alternative1";
chr6H	PanBaRT20_trans_aveTPM10.gtf	exon	194388388	194388536	.	-	.	gene_id "A5:chr6H:194387781-194388388:194387781-194388436:-"; transcript_id "A5:chr6H:194387781-194388388:194387781-194388436:-:alternative1";
chr6H	PanBaRT20_trans_aveTPM10.gtf	exon	194387681	194387781	.	-	.	gene_id "A5:chr6H:194387781-194388388:194387781-194388436:-"; transcript_id "A5:chr6H:194387781-194388388:194387781-194388436:-:alternative2";
chr6H	PanBaRT20_trans_aveTPM10.gtf	exon	194388436	194388536	.	-	.	gene_id "A5:chr6H:194387781-194388388:194387781-194388436:-"; transcript_id "A5:chr6H:194387781-194388388:194387781-194388436:-:alternative2";
chr6H	PanBaRT20_trans_aveTPM10.gtf	exon	242826691	242826791	.	-	.	gene_id "A5:chr6H:242826791-242826849:242826791-242826945:-"; transcript_id "A5:chr6H:242826791-242826849:242826791-242826945:-:alternative1";
chr6H	PanBaRT20_trans_aveTPM10.gtf	exon	242826849	242827045	.	-	.	gene_id "A5:chr6H:242826791-242826849:242826791-242826945:-"; transcript_id "A5:chr6H:242826791-242826849:242826791-242826945:-:alternative1";
chr6H	PanBaRT20_trans_aveTPM10.gtf	exon	242826691	242826791	.	-	.	gene_id "A5:chr6H:242826791-242826849:242826791-242826945:-"; transcript_id "A5:chr6H:242826791-242826849:242826791-242826945:-:alternative2";
chr6H	PanBaRT20_trans_aveTPM10.gtf	exon	242826945	242827045	.	-	.	gene_id "A5:chr6H:242826791-242826849:242826791-242826945:-"; transcript_id "A5:chr6H:242826791-242826849:242826791-242826945:-:alternative2";
chr6H	PanBaRT20_trans_aveTPM10.gtf	exon	269269509	269269609	.	-	.	gene_id "A5:chr6H:269269609-269269696:269269609-269269779:-"; transcript_id "A5:chr6H:269269609-269269696:269269609-269269779:-:alternative1";
chr6H	PanBaRT20_trans_aveTPM10.gtf	exon	269269696	269269879	.	-	.	gene_id "A5:chr6H:269269609-269269696:269269609-269269779:-"; transcript_id "A5:chr6H:269269609-269269696:269269609-269269779:-:alternative1";
chr6H	PanBaRT20_trans_aveTPM10.gtf	exon	269269509	269269609	.	-	.	gene_id "A5:chr6H:269269609-269269696:269269609-269269779:-"; transcript_id "A5:chr6H:269269609-269269696:269269609-269269779:-:alternative2";
chr6H	PanBaRT20_trans_aveTPM10.gtf	exon	269269779	269269879	.	-	.	gene_id "A5:chr6H:269269609-269269696:269269609-269269779:-"; transcript_id "A5:chr6H:269269609-269269696:269269609-269269779:-:alternative2";
chr6H	PanBaRT20_trans_aveTPM10.gtf	exon	442494738	442494838	.	-	.	gene_id "A5:chr6H:442494838-442494977:442494838-442494998:-"; transcript_id "A5:chr6H:442494838-442494977:442494838-442494998:-:alternative1";
chr6H	PanBaRT20_trans_aveTPM10.gtf	exon	442494977	442495098	.	-	.	gene_id "A5:chr6H:442494838-442494977:442494838-442494998:-"; transcript_id "A5:chr6H:442494838-442494977:442494838-442494998:-:alternative1";
chr6H	PanBaRT20_trans_aveTPM10.gtf	exon	442494738	442494838	.	-	.	gene_id "A5:chr6H:442494838-442494977:442494838-442494998:-"; transcript_id "A5:chr6H:442494838-442494977:442494838-442494998:-:alternative2";
chr6H	PanBaRT20_trans_aveTPM10.gtf	exon	442494998	442495098	.	-	.	gene_id "A5:chr6H:442494838-442494977:442494838-442494998:-"; transcript_id "A5:chr6H:442494838-442494977:442494838-442494998:-:alternative2";
chr6H	PanBaRT20_trans_aveTPM10.gtf	exon	518831400	518831500	.	-	.	gene_id "A5:chr6H:518831500-518832029:518831500-518832033:-"; transcript_id "A5:chr6H:518831500-518832029:518831500-518832033:-:alternative1";
chr6H	PanBaRT20_trans_aveTPM10.gtf	exon	518832029	518832133	.	-	.	gene_id "A5:chr6H:518831500-518832029:518831500-518832033:-"; transcript_id "A5:chr6H:518831500-518832029:518831500-518832033:-:alternative1";
chr6H	PanBaRT20_trans_aveTPM10.gtf	exon	518831400	518831500	.	-	.	gene_id "A5:chr6H:518831500-518832029:518831500-518832033:-"; transcript_id "A5:chr6H:518831500-518832029:518831500-518832033:-:alternative2";
chr6H	PanBaRT20_trans_aveTPM10.gtf	exon	518832033	518832133	.	-	.	gene_id "A5:chr6H:518831500-518832029:518831500-518832033:-"; transcript_id "A5:chr6H:518831500-518832029:518831500-518832033:-:alternative2";
chr6H	PanBaRT20_trans_aveTPM10.gtf	exon	518833524	518833624	.	-	.	gene_id "A5:chr6H:518833624-518834960:518833624-518834973:-"; transcript_id "A5:chr6H:518833624-518834960:518833624-518834973:-:alternative1";
chr6H	PanBaRT20_trans_aveTPM10.gtf	exon	518834960	518835073	.	-	.	gene_id "A5:chr6H:518833624-518834960:518833624-518834973:-"; transcript_id "A5:chr6H:518833624-518834960:518833624-518834973:-:alternative1";
chr6H	PanBaRT20_trans_aveTPM10.gtf	exon	518833524	518833624	.	-	.	gene_id "A5:chr6H:518833624-518834960:518833624-518834973:-"; transcript_id "A5:chr6H:518833624-518834960:518833624-518834973:-:alternative2";
chr6H	PanBaRT20_trans_aveTPM10.gtf	exon	518834973	518835073	.	-	.	gene_id "A5:chr6H:518833624-518834960:518833624-518834973:-"; transcript_id "A5:chr6H:518833624-518834960:518833624-518834973:-:alternative2";
chr6H	PanBaRT20_trans_aveTPM10.gtf	exon	535734368	535734468	.	-	.	gene_id "A5:chr6H:535734468-535734628:535734468-535734630:-"; transcript_id "A5:chr6H:535734468-535734628:535734468-535734630:-:alternative1";
chr6H	PanBaRT20_trans_aveTPM10.gtf	exon	535734628	535734730	.	-	.	gene_id "A5:chr6H:535734468-535734628:535734468-535734630:-"; transcript_id "A5:chr6H:535734468-535734628:535734468-535734630:-:alternative1";
chr6H	PanBaRT20_trans_aveTPM10.gtf	exon	535734368	535734468	.	-	.	gene_id "A5:chr6H:535734468-535734628:535734468-535734630:-"; transcript_id "A5:chr6H:535734468-535734628:535734468-535734630:-:alternative2";
chr6H	PanBaRT20_trans_aveTPM10.gtf	exon	535734630	535734730	.	-	.	gene_id "A5:chr6H:535734468-535734628:535734468-535734630:-"; transcript_id "A5:chr6H:535734468-535734628:535734468-535734630:-:alternative2";
chr6H	PanBaRT20_trans_aveTPM10.gtf	exon	535736122	535736222	.	-	.	gene_id "A5:chr6H:535736222-535736290:535736222-535736336:-"; transcript_id "A5:chr6H:535736222-535736290:535736222-535736336:-:alternative1";
chr6H	PanBaRT20_trans_aveTPM10.gtf	exon	535736290	535736436	.	-	.	gene_id "A5:chr6H:535736222-535736290:535736222-535736336:-"; transcript_id "A5:chr6H:535736222-535736290:535736222-535736336:-:alternative1";
chr6H	PanBaRT20_trans_aveTPM10.gtf	exon	535736122	535736222	.	-	.	gene_id "A5:chr6H:535736222-535736290:535736222-535736336:-"; transcript_id "A5:chr6H:535736222-535736290:535736222-535736336:-:alternative2";
chr6H	PanBaRT20_trans_aveTPM10.gtf	exon	535736336	535736436	.	-	.	gene_id "A5:chr6H:535736222-535736290:535736222-535736336:-"; transcript_id "A5:chr6H:535736222-535736290:535736222-535736336:-:alternative2";
chr6H	PanBaRT20_trans_aveTPM10.gtf	exon	567984806	567984906	.	-	.	gene_id "A5:chr6H:567984906-567985883:567984906-567985913:-"; transcript_id "A5:chr6H:567984906-567985883:567984906-567985913:-:alternative1";
chr6H	PanBaRT20_trans_aveTPM10.gtf	exon	567985883	567986013	.	-	.	gene_id "A5:chr6H:567984906-567985883:567984906-567985913:-"; transcript_id "A5:chr6H:567984906-567985883:567984906-567985913:-:alternative1";
chr6H	PanBaRT20_trans_aveTPM10.gtf	exon	567984806	567984906	.	-	.	gene_id "A5:chr6H:567984906-567985883:567984906-567985913:-"; transcript_id "A5:chr6H:567984906-567985883:567984906-567985913:-:alternative2";
chr6H	PanBaRT20_trans_aveTPM10.gtf	exon	567985913	567986013	.	-	.	gene_id "A5:chr6H:567984906-567985883:567984906-567985913:-"; transcript_id "A5:chr6H:567984906-567985883:567984906-567985913:-:alternative2";
chr6H	PanBaRT20_trans_aveTPM10.gtf	exon	594283610	594283710	.	-	.	gene_id "A5:chr6H:594283710-594283797:594283710-594283834:-"; transcript_id "A5:chr6H:594283710-594283797:594283710-594283834:-:alternative1";
chr6H	PanBaRT20_trans_aveTPM10.gtf	exon	594283797	594283934	.	-	.	gene_id "A5:chr6H:594283710-594283797:594283710-594283834:-"; transcript_id "A5:chr6H:594283710-594283797:594283710-594283834:-:alternative1";
chr6H	PanBaRT20_trans_aveTPM10.gtf	exon	594283610	594283710	.	-	.	gene_id "A5:chr6H:594283710-594283797:594283710-594283834:-"; transcript_id "A5:chr6H:594283710-594283797:594283710-594283834:-:alternative2";
chr6H	PanBaRT20_trans_aveTPM10.gtf	exon	594283834	594283934	.	-	.	gene_id "A5:chr6H:594283710-594283797:594283710-594283834:-"; transcript_id "A5:chr6H:594283710-594283797:594283710-594283834:-:alternative2";
chr6H	PanBaRT20_trans_aveTPM10.gtf	exon	28308376	28308495	.	+	.	gene_id "A5:chr6H:28308495-28308596:28308476-28308596:+"; transcript_id "A5:chr6H:28308495-28308596:28308476-28308596:+:alternative1";
chr6H	PanBaRT20_trans_aveTPM10.gtf	exon	28308596	28308696	.	+	.	gene_id "A5:chr6H:28308495-28308596:28308476-28308596:+"; transcript_id "A5:chr6H:28308495-28308596:28308476-28308596:+:alternative1";
chr6H	PanBaRT20_trans_aveTPM10.gtf	exon	28308376	28308476	.	+	.	gene_id "A5:chr6H:28308495-28308596:28308476-28308596:+"; transcript_id "A5:chr6H:28308495-28308596:28308476-28308596:+:alternative2";
chr6H	PanBaRT20_trans_aveTPM10.gtf	exon	28308596	28308696	.	+	.	gene_id "A5:chr6H:28308495-28308596:28308476-28308596:+"; transcript_id "A5:chr6H:28308495-28308596:28308476-28308596:+:alternative2";
chr6H	PanBaRT20_trans_aveTPM10.gtf	exon	126333709	126334292	.	+	.	gene_id "A5:chr6H:126334292-126334997:126333809-126334997:+"; transcript_id "A5:chr6H:126334292-126334997:126333809-126334997:+:alternative1";
chr6H	PanBaRT20_trans_aveTPM10.gtf	exon	126334997	126335097	.	+	.	gene_id "A5:chr6H:126334292-126334997:126333809-126334997:+"; transcript_id "A5:chr6H:126334292-126334997:126333809-126334997:+:alternative1";
chr6H	PanBaRT20_trans_aveTPM10.gtf	exon	126333709	126333809	.	+	.	gene_id "A5:chr6H:126334292-126334997:126333809-126334997:+"; transcript_id "A5:chr6H:126334292-126334997:126333809-126334997:+:alternative2";
chr6H	PanBaRT20_trans_aveTPM10.gtf	exon	126334997	126335097	.	+	.	gene_id "A5:chr6H:126334292-126334997:126333809-126334997:+"; transcript_id "A5:chr6H:126334292-126334997:126333809-126334997:+:alternative2";
chr6H	PanBaRT20_trans_aveTPM10.gtf	exon	202121182	202121310	.	+	.	gene_id "A5:chr6H:202121310-202121395:202121282-202121395:+"; transcript_id "A5:chr6H:202121310-202121395:202121282-202121395:+:alternative1";
chr6H	PanBaRT20_trans_aveTPM10.gtf	exon	202121395	202121495	.	+	.	gene_id "A5:chr6H:202121310-202121395:202121282-202121395:+"; transcript_id "A5:chr6H:202121310-202121395:202121282-202121395:+:alternative1";
chr6H	PanBaRT20_trans_aveTPM10.gtf	exon	202121182	202121282	.	+	.	gene_id "A5:chr6H:202121310-202121395:202121282-202121395:+"; transcript_id "A5:chr6H:202121310-202121395:202121282-202121395:+:alternative2";
chr6H	PanBaRT20_trans_aveTPM10.gtf	exon	202121395	202121495	.	+	.	gene_id "A5:chr6H:202121310-202121395:202121282-202121395:+"; transcript_id "A5:chr6H:202121310-202121395:202121282-202121395:+:alternative2";
chr6H	PanBaRT20_trans_aveTPM10.gtf	exon	222968259	222968362	.	+	.	gene_id "A5:chr6H:222968362-222968538:222968359-222968538:+"; transcript_id "A5:chr6H:222968362-222968538:222968359-222968538:+:alternative1";
chr6H	PanBaRT20_trans_aveTPM10.gtf	exon	222968538	222968638	.	+	.	gene_id "A5:chr6H:222968362-222968538:222968359-222968538:+"; transcript_id "A5:chr6H:222968362-222968538:222968359-222968538:+:alternative1";
chr6H	PanBaRT20_trans_aveTPM10.gtf	exon	222968259	222968359	.	+	.	gene_id "A5:chr6H:222968362-222968538:222968359-222968538:+"; transcript_id "A5:chr6H:222968362-222968538:222968359-222968538:+:alternative2";
chr6H	PanBaRT20_trans_aveTPM10.gtf	exon	222968538	222968638	.	+	.	gene_id "A5:chr6H:222968362-222968538:222968359-222968538:+"; transcript_id "A5:chr6H:222968362-222968538:222968359-222968538:+:alternative2";
chr6H	PanBaRT20_trans_aveTPM10.gtf	exon	391731256	391731367	.	+	.	gene_id "A5:chr6H:391731367-391731458:391731356-391731458:+"; transcript_id "A5:chr6H:391731367-391731458:391731356-391731458:+:alternative1";
chr6H	PanBaRT20_trans_aveTPM10.gtf	exon	391731458	391731558	.	+	.	gene_id "A5:chr6H:391731367-391731458:391731356-391731458:+"; transcript_id "A5:chr6H:391731367-391731458:391731356-391731458:+:alternative1";
chr6H	PanBaRT20_trans_aveTPM10.gtf	exon	391731256	391731356	.	+	.	gene_id "A5:chr6H:391731367-391731458:391731356-391731458:+"; transcript_id "A5:chr6H:391731367-391731458:391731356-391731458:+:alternative2";
chr6H	PanBaRT20_trans_aveTPM10.gtf	exon	391731458	391731558	.	+	.	gene_id "A5:chr6H:391731367-391731458:391731356-391731458:+"; transcript_id "A5:chr6H:391731367-391731458:391731356-391731458:+:alternative2";
chr6H	PanBaRT20_trans_aveTPM10.gtf	exon	577488060	577488164	.	+	.	gene_id "A5:chr6H:577488164-577488617:577488160-577488617:+"; transcript_id "A5:chr6H:577488164-577488617:577488160-577488617:+:alternative1";
chr6H	PanBaRT20_trans_aveTPM10.gtf	exon	577488617	577488717	.	+	.	gene_id "A5:chr6H:577488164-577488617:577488160-577488617:+"; transcript_id "A5:chr6H:577488164-577488617:577488160-577488617:+:alternative1";
chr6H	PanBaRT20_trans_aveTPM10.gtf	exon	577488060	577488160	.	+	.	gene_id "A5:chr6H:577488164-577488617:577488160-577488617:+"; transcript_id "A5:chr6H:577488164-577488617:577488160-577488617:+:alternative2";
chr6H	PanBaRT20_trans_aveTPM10.gtf	exon	577488617	577488717	.	+	.	gene_id "A5:chr6H:577488164-577488617:577488160-577488617:+"; transcript_id "A5:chr6H:577488164-577488617:577488160-577488617:+:alternative2";
chr7H	PanBaRT20_trans_aveTPM10.gtf	exon	4672911	4673011	.	-	.	gene_id "A5:chr7H:4673011-4673670:4673011-4673710:-"; transcript_id "A5:chr7H:4673011-4673670:4673011-4673710:-:alternative1";
chr7H	PanBaRT20_trans_aveTPM10.gtf	exon	4673670	4673810	.	-	.	gene_id "A5:chr7H:4673011-4673670:4673011-4673710:-"; transcript_id "A5:chr7H:4673011-4673670:4673011-4673710:-:alternative1";
chr7H	PanBaRT20_trans_aveTPM10.gtf	exon	4672911	4673011	.	-	.	gene_id "A5:chr7H:4673011-4673670:4673011-4673710:-"; transcript_id "A5:chr7H:4673011-4673670:4673011-4673710:-:alternative2";
chr7H	PanBaRT20_trans_aveTPM10.gtf	exon	4673710	4673810	.	-	.	gene_id "A5:chr7H:4673011-4673670:4673011-4673710:-"; transcript_id "A5:chr7H:4673011-4673670:4673011-4673710:-:alternative2";
chr7H	PanBaRT20_trans_aveTPM10.gtf	exon	33357541	33357641	.	-	.	gene_id "A5:chr7H:33357641-33357880:33357641-33357930:-"; transcript_id "A5:chr7H:33357641-33357880:33357641-33357930:-:alternative1";
chr7H	PanBaRT20_trans_aveTPM10.gtf	exon	33357880	33358030	.	-	.	gene_id "A5:chr7H:33357641-33357880:33357641-33357930:-"; transcript_id "A5:chr7H:33357641-33357880:33357641-33357930:-:alternative1";
chr7H	PanBaRT20_trans_aveTPM10.gtf	exon	33357541	33357641	.	-	.	gene_id "A5:chr7H:33357641-33357880:33357641-33357930:-"; transcript_id "A5:chr7H:33357641-33357880:33357641-33357930:-:alternative2";
chr7H	PanBaRT20_trans_aveTPM10.gtf	exon	33357930	33358030	.	-	.	gene_id "A5:chr7H:33357641-33357880:33357641-33357930:-"; transcript_id "A5:chr7H:33357641-33357880:33357641-33357930:-:alternative2";
chr7H	PanBaRT20_trans_aveTPM10.gtf	exon	96978735	96978835	.	-	.	gene_id "A5:chr7H:96978835-96979008:96978835-96979027:-"; transcript_id "A5:chr7H:96978835-96979008:96978835-96979027:-:alternative1";
chr7H	PanBaRT20_trans_aveTPM10.gtf	exon	96979008	96979127	.	-	.	gene_id "A5:chr7H:96978835-96979008:96978835-96979027:-"; transcript_id "A5:chr7H:96978835-96979008:96978835-96979027:-:alternative1";
chr7H	PanBaRT20_trans_aveTPM10.gtf	exon	96978735	96978835	.	-	.	gene_id "A5:chr7H:96978835-96979008:96978835-96979027:-"; transcript_id "A5:chr7H:96978835-96979008:96978835-96979027:-:alternative2";
chr7H	PanBaRT20_trans_aveTPM10.gtf	exon	96979027	96979127	.	-	.	gene_id "A5:chr7H:96978835-96979008:96978835-96979027:-"; transcript_id "A5:chr7H:96978835-96979008:96978835-96979027:-:alternative2";
chr7H	PanBaRT20_trans_aveTPM10.gtf	exon	268510620	268510720	.	-	.	gene_id "A5:chr7H:268510720-268511359:268510720-268511371:-"; transcript_id "A5:chr7H:268510720-268511359:268510720-268511371:-:alternative1";
chr7H	PanBaRT20_trans_aveTPM10.gtf	exon	268511359	268511471	.	-	.	gene_id "A5:chr7H:268510720-268511359:268510720-268511371:-"; transcript_id "A5:chr7H:268510720-268511359:268510720-268511371:-:alternative1";
chr7H	PanBaRT20_trans_aveTPM10.gtf	exon	268510620	268510720	.	-	.	gene_id "A5:chr7H:268510720-268511359:268510720-268511371:-"; transcript_id "A5:chr7H:268510720-268511359:268510720-268511371:-:alternative2";
chr7H	PanBaRT20_trans_aveTPM10.gtf	exon	268511371	268511471	.	-	.	gene_id "A5:chr7H:268510720-268511359:268510720-268511371:-"; transcript_id "A5:chr7H:268510720-268511359:268510720-268511371:-:alternative2";
chr7H	PanBaRT20_trans_aveTPM10.gtf	exon	279978156	279978256	.	-	.	gene_id "A5:chr7H:279978256-279979201:279978256-279979374:-"; transcript_id "A5:chr7H:279978256-279979201:279978256-279979374:-:alternative1";
chr7H	PanBaRT20_trans_aveTPM10.gtf	exon	279979201	279979474	.	-	.	gene_id "A5:chr7H:279978256-279979201:279978256-279979374:-"; transcript_id "A5:chr7H:279978256-279979201:279978256-279979374:-:alternative1";
chr7H	PanBaRT20_trans_aveTPM10.gtf	exon	279978156	279978256	.	-	.	gene_id "A5:chr7H:279978256-279979201:279978256-279979374:-"; transcript_id "A5:chr7H:279978256-279979201:279978256-279979374:-:alternative2";
chr7H	PanBaRT20_trans_aveTPM10.gtf	exon	279979374	279979474	.	-	.	gene_id "A5:chr7H:279978256-279979201:279978256-279979374:-"; transcript_id "A5:chr7H:279978256-279979201:279978256-279979374:-:alternative2";
chr7H	PanBaRT20_trans_aveTPM10.gtf	exon	485884710	485884810	.	-	.	gene_id "A5:chr7H:485884810-485885309:485884810-485885659:-"; transcript_id "A5:chr7H:485884810-485885309:485884810-485885659:-:alternative1";
chr7H	PanBaRT20_trans_aveTPM10.gtf	exon	485885309	485885759	.	-	.	gene_id "A5:chr7H:485884810-485885309:485884810-485885659:-"; transcript_id "A5:chr7H:485884810-485885309:485884810-485885659:-:alternative1";
chr7H	PanBaRT20_trans_aveTPM10.gtf	exon	485884710	485884810	.	-	.	gene_id "A5:chr7H:485884810-485885309:485884810-485885659:-"; transcript_id "A5:chr7H:485884810-485885309:485884810-485885659:-:alternative2";
chr7H	PanBaRT20_trans_aveTPM10.gtf	exon	485885659	485885759	.	-	.	gene_id "A5:chr7H:485884810-485885309:485884810-485885659:-"; transcript_id "A5:chr7H:485884810-485885309:485884810-485885659:-:alternative2";
chr7H	PanBaRT20_trans_aveTPM10.gtf	exon	541034277	541034377	.	-	.	gene_id "A5:chr7H:541034377-541035190:541034377-541035205:-"; transcript_id "A5:chr7H:541034377-541035190:541034377-541035205:-:alternative1";
chr7H	PanBaRT20_trans_aveTPM10.gtf	exon	541035190	541035305	.	-	.	gene_id "A5:chr7H:541034377-541035190:541034377-541035205:-"; transcript_id "A5:chr7H:541034377-541035190:541034377-541035205:-:alternative1";
chr7H	PanBaRT20_trans_aveTPM10.gtf	exon	541034277	541034377	.	-	.	gene_id "A5:chr7H:541034377-541035190:541034377-541035205:-"; transcript_id "A5:chr7H:541034377-541035190:541034377-541035205:-:alternative2";
chr7H	PanBaRT20_trans_aveTPM10.gtf	exon	541035205	541035305	.	-	.	gene_id "A5:chr7H:541034377-541035190:541034377-541035205:-"; transcript_id "A5:chr7H:541034377-541035190:541034377-541035205:-:alternative2";
chr7H	PanBaRT20_trans_aveTPM10.gtf	exon	541034277	541034377	.	-	.	gene_id "A5:chr7H:541034377-541035190:541034377-541035265:-"; transcript_id "A5:chr7H:541034377-541035190:541034377-541035265:-:alternative1";
chr7H	PanBaRT20_trans_aveTPM10.gtf	exon	541035190	541035365	.	-	.	gene_id "A5:chr7H:541034377-541035190:541034377-541035265:-"; transcript_id "A5:chr7H:541034377-541035190:541034377-541035265:-:alternative1";
chr7H	PanBaRT20_trans_aveTPM10.gtf	exon	541034277	541034377	.	-	.	gene_id "A5:chr7H:541034377-541035190:541034377-541035265:-"; transcript_id "A5:chr7H:541034377-541035190:541034377-541035265:-:alternative2";
chr7H	PanBaRT20_trans_aveTPM10.gtf	exon	541035265	541035365	.	-	.	gene_id "A5:chr7H:541034377-541035190:541034377-541035265:-"; transcript_id "A5:chr7H:541034377-541035190:541034377-541035265:-:alternative2";
chr7H	PanBaRT20_trans_aveTPM10.gtf	exon	541034277	541034377	.	-	.	gene_id "A5:chr7H:541034377-541035205:541034377-541035265:-"; transcript_id "A5:chr7H:541034377-541035205:541034377-541035265:-:alternative1";
chr7H	PanBaRT20_trans_aveTPM10.gtf	exon	541035205	541035365	.	-	.	gene_id "A5:chr7H:541034377-541035205:541034377-541035265:-"; transcript_id "A5:chr7H:541034377-541035205:541034377-541035265:-:alternative1";
chr7H	PanBaRT20_trans_aveTPM10.gtf	exon	541034277	541034377	.	-	.	gene_id "A5:chr7H:541034377-541035205:541034377-541035265:-"; transcript_id "A5:chr7H:541034377-541035205:541034377-541035265:-:alternative2";
chr7H	PanBaRT20_trans_aveTPM10.gtf	exon	541035265	541035365	.	-	.	gene_id "A5:chr7H:541034377-541035205:541034377-541035265:-"; transcript_id "A5:chr7H:541034377-541035205:541034377-541035265:-:alternative2";
chr7H	PanBaRT20_trans_aveTPM10.gtf	exon	10388343	10388467	.	+	.	gene_id "A5:chr7H:10388467-10389847:10388443-10389847:+"; transcript_id "A5:chr7H:10388467-10389847:10388443-10389847:+:alternative1";
chr7H	PanBaRT20_trans_aveTPM10.gtf	exon	10389847	10389947	.	+	.	gene_id "A5:chr7H:10388467-10389847:10388443-10389847:+"; transcript_id "A5:chr7H:10388467-10389847:10388443-10389847:+:alternative1";
chr7H	PanBaRT20_trans_aveTPM10.gtf	exon	10388343	10388443	.	+	.	gene_id "A5:chr7H:10388467-10389847:10388443-10389847:+"; transcript_id "A5:chr7H:10388467-10389847:10388443-10389847:+:alternative2";
chr7H	PanBaRT20_trans_aveTPM10.gtf	exon	10389847	10389947	.	+	.	gene_id "A5:chr7H:10388467-10389847:10388443-10389847:+"; transcript_id "A5:chr7H:10388467-10389847:10388443-10389847:+:alternative2";
chr7H	PanBaRT20_trans_aveTPM10.gtf	exon	10388367	10388471	.	+	.	gene_id "A5:chr7H:10388471-10389847:10388467-10389847:+"; transcript_id "A5:chr7H:10388471-10389847:10388467-10389847:+:alternative1";
chr7H	PanBaRT20_trans_aveTPM10.gtf	exon	10389847	10389947	.	+	.	gene_id "A5:chr7H:10388471-10389847:10388467-10389847:+"; transcript_id "A5:chr7H:10388471-10389847:10388467-10389847:+:alternative1";
chr7H	PanBaRT20_trans_aveTPM10.gtf	exon	10388367	10388467	.	+	.	gene_id "A5:chr7H:10388471-10389847:10388467-10389847:+"; transcript_id "A5:chr7H:10388471-10389847:10388467-10389847:+:alternative2";
chr7H	PanBaRT20_trans_aveTPM10.gtf	exon	10389847	10389947	.	+	.	gene_id "A5:chr7H:10388471-10389847:10388467-10389847:+"; transcript_id "A5:chr7H:10388471-10389847:10388467-10389847:+:alternative2";
chr7H	PanBaRT20_trans_aveTPM10.gtf	exon	10388343	10388471	.	+	.	gene_id "A5:chr7H:10388471-10389847:10388443-10389847:+"; transcript_id "A5:chr7H:10388471-10389847:10388443-10389847:+:alternative1";
chr7H	PanBaRT20_trans_aveTPM10.gtf	exon	10389847	10389947	.	+	.	gene_id "A5:chr7H:10388471-10389847:10388443-10389847:+"; transcript_id "A5:chr7H:10388471-10389847:10388443-10389847:+:alternative1";
chr7H	PanBaRT20_trans_aveTPM10.gtf	exon	10388343	10388443	.	+	.	gene_id "A5:chr7H:10388471-10389847:10388443-10389847:+"; transcript_id "A5:chr7H:10388471-10389847:10388443-10389847:+:alternative2";
chr7H	PanBaRT20_trans_aveTPM10.gtf	exon	10389847	10389947	.	+	.	gene_id "A5:chr7H:10388471-10389847:10388443-10389847:+"; transcript_id "A5:chr7H:10388471-10389847:10388443-10389847:+:alternative2";
chr7H	PanBaRT20_trans_aveTPM10.gtf	exon	33940275	33941187	.	+	.	gene_id "A5:chr7H:33941187-33941494:33940375-33941494:+"; transcript_id "A5:chr7H:33941187-33941494:33940375-33941494:+:alternative1";
chr7H	PanBaRT20_trans_aveTPM10.gtf	exon	33941494	33941594	.	+	.	gene_id "A5:chr7H:33941187-33941494:33940375-33941494:+"; transcript_id "A5:chr7H:33941187-33941494:33940375-33941494:+:alternative1";
chr7H	PanBaRT20_trans_aveTPM10.gtf	exon	33940275	33940375	.	+	.	gene_id "A5:chr7H:33941187-33941494:33940375-33941494:+"; transcript_id "A5:chr7H:33941187-33941494:33940375-33941494:+:alternative2";
chr7H	PanBaRT20_trans_aveTPM10.gtf	exon	33941494	33941594	.	+	.	gene_id "A5:chr7H:33941187-33941494:33940375-33941494:+"; transcript_id "A5:chr7H:33941187-33941494:33940375-33941494:+:alternative2";
chr7H	PanBaRT20_trans_aveTPM10.gtf	exon	216323314	216323504	.	+	.	gene_id "A5:chr7H:216323504-216323594:216323414-216323594:+"; transcript_id "A5:chr7H:216323504-216323594:216323414-216323594:+:alternative1";
chr7H	PanBaRT20_trans_aveTPM10.gtf	exon	216323594	216323694	.	+	.	gene_id "A5:chr7H:216323504-216323594:216323414-216323594:+"; transcript_id "A5:chr7H:216323504-216323594:216323414-216323594:+:alternative1";
chr7H	PanBaRT20_trans_aveTPM10.gtf	exon	216323314	216323414	.	+	.	gene_id "A5:chr7H:216323504-216323594:216323414-216323594:+"; transcript_id "A5:chr7H:216323504-216323594:216323414-216323594:+:alternative2";
chr7H	PanBaRT20_trans_aveTPM10.gtf	exon	216323594	216323694	.	+	.	gene_id "A5:chr7H:216323504-216323594:216323414-216323594:+"; transcript_id "A5:chr7H:216323504-216323594:216323414-216323594:+:alternative2";
chr7H	PanBaRT20_trans_aveTPM10.gtf	exon	233628507	233628629	.	+	.	gene_id "A5:chr7H:233628629-233628948:233628607-233628948:+"; transcript_id "A5:chr7H:233628629-233628948:233628607-233628948:+:alternative1";
chr7H	PanBaRT20_trans_aveTPM10.gtf	exon	233628948	233629048	.	+	.	gene_id "A5:chr7H:233628629-233628948:233628607-233628948:+"; transcript_id "A5:chr7H:233628629-233628948:233628607-233628948:+:alternative1";
chr7H	PanBaRT20_trans_aveTPM10.gtf	exon	233628507	233628607	.	+	.	gene_id "A5:chr7H:233628629-233628948:233628607-233628948:+"; transcript_id "A5:chr7H:233628629-233628948:233628607-233628948:+:alternative2";
chr7H	PanBaRT20_trans_aveTPM10.gtf	exon	233628948	233629048	.	+	.	gene_id "A5:chr7H:233628629-233628948:233628607-233628948:+"; transcript_id "A5:chr7H:233628629-233628948:233628607-233628948:+:alternative2";
chr7H	PanBaRT20_trans_aveTPM10.gtf	exon	233625621	233625745	.	+	.	gene_id "A5:chr7H:233625745-233626740:233625721-233626740:+"; transcript_id "A5:chr7H:233625745-233626740:233625721-233626740:+:alternative1";
chr7H	PanBaRT20_trans_aveTPM10.gtf	exon	233626740	233626840	.	+	.	gene_id "A5:chr7H:233625745-233626740:233625721-233626740:+"; transcript_id "A5:chr7H:233625745-233626740:233625721-233626740:+:alternative1";
chr7H	PanBaRT20_trans_aveTPM10.gtf	exon	233625621	233625721	.	+	.	gene_id "A5:chr7H:233625745-233626740:233625721-233626740:+"; transcript_id "A5:chr7H:233625745-233626740:233625721-233626740:+:alternative2";
chr7H	PanBaRT20_trans_aveTPM10.gtf	exon	233626740	233626840	.	+	.	gene_id "A5:chr7H:233625745-233626740:233625721-233626740:+"; transcript_id "A5:chr7H:233625745-233626740:233625721-233626740:+:alternative2";
chr7H	PanBaRT20_trans_aveTPM10.gtf	exon	281251900	281252005	.	+	.	gene_id "A5:chr7H:281252005-281252141:281252000-281252141:+"; transcript_id "A5:chr7H:281252005-281252141:281252000-281252141:+:alternative1";
chr7H	PanBaRT20_trans_aveTPM10.gtf	exon	281252141	281252241	.	+	.	gene_id "A5:chr7H:281252005-281252141:281252000-281252141:+"; transcript_id "A5:chr7H:281252005-281252141:281252000-281252141:+:alternative1";
chr7H	PanBaRT20_trans_aveTPM10.gtf	exon	281251900	281252000	.	+	.	gene_id "A5:chr7H:281252005-281252141:281252000-281252141:+"; transcript_id "A5:chr7H:281252005-281252141:281252000-281252141:+:alternative2";
chr7H	PanBaRT20_trans_aveTPM10.gtf	exon	281252141	281252241	.	+	.	gene_id "A5:chr7H:281252005-281252141:281252000-281252141:+"; transcript_id "A5:chr7H:281252005-281252141:281252000-281252141:+:alternative2";
chr7H	PanBaRT20_trans_aveTPM10.gtf	exon	312883850	312883954	.	+	.	gene_id "A5:chr7H:312883954-312891690:312883950-312891690:+"; transcript_id "A5:chr7H:312883954-312891690:312883950-312891690:+:alternative1";
chr7H	PanBaRT20_trans_aveTPM10.gtf	exon	312891690	312891790	.	+	.	gene_id "A5:chr7H:312883954-312891690:312883950-312891690:+"; transcript_id "A5:chr7H:312883954-312891690:312883950-312891690:+:alternative1";
chr7H	PanBaRT20_trans_aveTPM10.gtf	exon	312883850	312883950	.	+	.	gene_id "A5:chr7H:312883954-312891690:312883950-312891690:+"; transcript_id "A5:chr7H:312883954-312891690:312883950-312891690:+:alternative2";
chr7H	PanBaRT20_trans_aveTPM10.gtf	exon	312891690	312891790	.	+	.	gene_id "A5:chr7H:312883954-312891690:312883950-312891690:+"; transcript_id "A5:chr7H:312883954-312891690:312883950-312891690:+:alternative2";
chr7H	PanBaRT20_trans_aveTPM10.gtf	exon	313693198	313693328	.	+	.	gene_id "A5:chr7H:313693328-313693626:313693298-313693626:+"; transcript_id "A5:chr7H:313693328-313693626:313693298-313693626:+:alternative1";
chr7H	PanBaRT20_trans_aveTPM10.gtf	exon	313693626	313693726	.	+	.	gene_id "A5:chr7H:313693328-313693626:313693298-313693626:+"; transcript_id "A5:chr7H:313693328-313693626:313693298-313693626:+:alternative1";
chr7H	PanBaRT20_trans_aveTPM10.gtf	exon	313693198	313693298	.	+	.	gene_id "A5:chr7H:313693328-313693626:313693298-313693626:+"; transcript_id "A5:chr7H:313693328-313693626:313693298-313693626:+:alternative2";
chr7H	PanBaRT20_trans_aveTPM10.gtf	exon	313693626	313693726	.	+	.	gene_id "A5:chr7H:313693328-313693626:313693298-313693626:+"; transcript_id "A5:chr7H:313693328-313693626:313693298-313693626:+:alternative2";
chr7H	PanBaRT20_trans_aveTPM10.gtf	exon	319043594	319043840	.	+	.	gene_id "A5:chr7H:319043840-319044941:319043694-319044941:+"; transcript_id "A5:chr7H:319043840-319044941:319043694-319044941:+:alternative1";
chr7H	PanBaRT20_trans_aveTPM10.gtf	exon	319044941	319045041	.	+	.	gene_id "A5:chr7H:319043840-319044941:319043694-319044941:+"; transcript_id "A5:chr7H:319043840-319044941:319043694-319044941:+:alternative1";
chr7H	PanBaRT20_trans_aveTPM10.gtf	exon	319043594	319043694	.	+	.	gene_id "A5:chr7H:319043840-319044941:319043694-319044941:+"; transcript_id "A5:chr7H:319043840-319044941:319043694-319044941:+:alternative2";
chr7H	PanBaRT20_trans_aveTPM10.gtf	exon	319044941	319045041	.	+	.	gene_id "A5:chr7H:319043840-319044941:319043694-319044941:+"; transcript_id "A5:chr7H:319043840-319044941:319043694-319044941:+:alternative2";
chr7H	PanBaRT20_trans_aveTPM10.gtf	exon	319043740	319043856	.	+	.	gene_id "A5:chr7H:319043856-319044941:319043840-319044941:+"; transcript_id "A5:chr7H:319043856-319044941:319043840-319044941:+:alternative1";
chr7H	PanBaRT20_trans_aveTPM10.gtf	exon	319044941	319045041	.	+	.	gene_id "A5:chr7H:319043856-319044941:319043840-319044941:+"; transcript_id "A5:chr7H:319043856-319044941:319043840-319044941:+:alternative1";
chr7H	PanBaRT20_trans_aveTPM10.gtf	exon	319043740	319043840	.	+	.	gene_id "A5:chr7H:319043856-319044941:319043840-319044941:+"; transcript_id "A5:chr7H:319043856-319044941:319043840-319044941:+:alternative2";
chr7H	PanBaRT20_trans_aveTPM10.gtf	exon	319044941	319045041	.	+	.	gene_id "A5:chr7H:319043856-319044941:319043840-319044941:+"; transcript_id "A5:chr7H:319043856-319044941:319043840-319044941:+:alternative2";
chr7H	PanBaRT20_trans_aveTPM10.gtf	exon	319043594	319043856	.	+	.	gene_id "A5:chr7H:319043856-319044941:319043694-319044941:+"; transcript_id "A5:chr7H:319043856-319044941:319043694-319044941:+:alternative1";
chr7H	PanBaRT20_trans_aveTPM10.gtf	exon	319044941	319045041	.	+	.	gene_id "A5:chr7H:319043856-319044941:319043694-319044941:+"; transcript_id "A5:chr7H:319043856-319044941:319043694-319044941:+:alternative1";
chr7H	PanBaRT20_trans_aveTPM10.gtf	exon	319043594	319043694	.	+	.	gene_id "A5:chr7H:319043856-319044941:319043694-319044941:+"; transcript_id "A5:chr7H:319043856-319044941:319043694-319044941:+:alternative2";
chr7H	PanBaRT20_trans_aveTPM10.gtf	exon	319044941	319045041	.	+	.	gene_id "A5:chr7H:319043856-319044941:319043694-319044941:+"; transcript_id "A5:chr7H:319043856-319044941:319043694-319044941:+:alternative2";
chr7H	PanBaRT20_trans_aveTPM10.gtf	exon	416740341	416740445	.	+	.	gene_id "A5:chr7H:416740445-416740532:416740441-416740532:+"; transcript_id "A5:chr7H:416740445-416740532:416740441-416740532:+:alternative1";
chr7H	PanBaRT20_trans_aveTPM10.gtf	exon	416740532	416740632	.	+	.	gene_id "A5:chr7H:416740445-416740532:416740441-416740532:+"; transcript_id "A5:chr7H:416740445-416740532:416740441-416740532:+:alternative1";
chr7H	PanBaRT20_trans_aveTPM10.gtf	exon	416740341	416740441	.	+	.	gene_id "A5:chr7H:416740445-416740532:416740441-416740532:+"; transcript_id "A5:chr7H:416740445-416740532:416740441-416740532:+:alternative2";
chr7H	PanBaRT20_trans_aveTPM10.gtf	exon	416740532	416740632	.	+	.	gene_id "A5:chr7H:416740445-416740532:416740441-416740532:+"; transcript_id "A5:chr7H:416740445-416740532:416740441-416740532:+:alternative2";
chr7H	PanBaRT20_trans_aveTPM10.gtf	exon	610323732	610324247	.	+	.	gene_id "A5:chr7H:610324247-610325571:610323832-610325571:+"; transcript_id "A5:chr7H:610324247-610325571:610323832-610325571:+:alternative1";
chr7H	PanBaRT20_trans_aveTPM10.gtf	exon	610325571	610325671	.	+	.	gene_id "A5:chr7H:610324247-610325571:610323832-610325571:+"; transcript_id "A5:chr7H:610324247-610325571:610323832-610325571:+:alternative1";
chr7H	PanBaRT20_trans_aveTPM10.gtf	exon	610323732	610323832	.	+	.	gene_id "A5:chr7H:610324247-610325571:610323832-610325571:+"; transcript_id "A5:chr7H:610324247-610325571:610323832-610325571:+:alternative2";
chr7H	PanBaRT20_trans_aveTPM10.gtf	exon	610325571	610325671	.	+	.	gene_id "A5:chr7H:610324247-610325571:610323832-610325571:+"; transcript_id "A5:chr7H:610324247-610325571:610323832-610325571:+:alternative2";
chr7H	PanBaRT20_trans_aveTPM10.gtf	exon	610323882	610324247	.	+	.	gene_id "A5:chr7H:610324247-610325571:610323982-610325571:+"; transcript_id "A5:chr7H:610324247-610325571:610323982-610325571:+:alternative1";
chr7H	PanBaRT20_trans_aveTPM10.gtf	exon	610325571	610325671	.	+	.	gene_id "A5:chr7H:610324247-610325571:610323982-610325571:+"; transcript_id "A5:chr7H:610324247-610325571:610323982-610325571:+:alternative1";
chr7H	PanBaRT20_trans_aveTPM10.gtf	exon	610323882	610323982	.	+	.	gene_id "A5:chr7H:610324247-610325571:610323982-610325571:+"; transcript_id "A5:chr7H:610324247-610325571:610323982-610325571:+:alternative2";
chr7H	PanBaRT20_trans_aveTPM10.gtf	exon	610325571	610325671	.	+	.	gene_id "A5:chr7H:610324247-610325571:610323982-610325571:+"; transcript_id "A5:chr7H:610324247-610325571:610323982-610325571:+:alternative2";
chr7H	PanBaRT20_trans_aveTPM10.gtf	exon	610323732	610323982	.	+	.	gene_id "A5:chr7H:610323982-610325571:610323832-610325571:+"; transcript_id "A5:chr7H:610323982-610325571:610323832-610325571:+:alternative1";
chr7H	PanBaRT20_trans_aveTPM10.gtf	exon	610325571	610325671	.	+	.	gene_id "A5:chr7H:610323982-610325571:610323832-610325571:+"; transcript_id "A5:chr7H:610323982-610325571:610323832-610325571:+:alternative1";
chr7H	PanBaRT20_trans_aveTPM10.gtf	exon	610323732	610323832	.	+	.	gene_id "A5:chr7H:610323982-610325571:610323832-610325571:+"; transcript_id "A5:chr7H:610323982-610325571:610323832-610325571:+:alternative2";
chr7H	PanBaRT20_trans_aveTPM10.gtf	exon	610325571	610325671	.	+	.	gene_id "A5:chr7H:610323982-610325571:610323832-610325571:+"; transcript_id "A5:chr7H:610323982-610325571:610323832-610325571:+:alternative2";
chr7H	PanBaRT20_trans_aveTPM10.gtf	exon	629979193	629979323	.	+	.	gene_id "A5:chr7H:629979323-629983137:629979293-629983137:+"; transcript_id "A5:chr7H:629979323-629983137:629979293-629983137:+:alternative1";
chr7H	PanBaRT20_trans_aveTPM10.gtf	exon	629983137	629983237	.	+	.	gene_id "A5:chr7H:629979323-629983137:629979293-629983137:+"; transcript_id "A5:chr7H:629979323-629983137:629979293-629983137:+:alternative1";
chr7H	PanBaRT20_trans_aveTPM10.gtf	exon	629979193	629979293	.	+	.	gene_id "A5:chr7H:629979323-629983137:629979293-629983137:+"; transcript_id "A5:chr7H:629979323-629983137:629979293-629983137:+:alternative2";
chr7H	PanBaRT20_trans_aveTPM10.gtf	exon	629983137	629983237	.	+	.	gene_id "A5:chr7H:629979323-629983137:629979293-629983137:+"; transcript_id "A5:chr7H:629979323-629983137:629979293-629983137:+:alternative2";
chr7H	PanBaRT20_trans_aveTPM10.gtf	exon	687633918	687634635	.	+	.	gene_id "A5:chr7H:687634635-687636056:687634018-687636056:+"; transcript_id "A5:chr7H:687634635-687636056:687634018-687636056:+:alternative1";
chr7H	PanBaRT20_trans_aveTPM10.gtf	exon	687636056	687636156	.	+	.	gene_id "A5:chr7H:687634635-687636056:687634018-687636056:+"; transcript_id "A5:chr7H:687634635-687636056:687634018-687636056:+:alternative1";
chr7H	PanBaRT20_trans_aveTPM10.gtf	exon	687633918	687634018	.	+	.	gene_id "A5:chr7H:687634635-687636056:687634018-687636056:+"; transcript_id "A5:chr7H:687634635-687636056:687634018-687636056:+:alternative2";
chr7H	PanBaRT20_trans_aveTPM10.gtf	exon	687636056	687636156	.	+	.	gene_id "A5:chr7H:687634635-687636056:687634018-687636056:+"; transcript_id "A5:chr7H:687634635-687636056:687634018-687636056:+:alternative2";
chr1H	PanBaRT20_trans_aveTPM10.gtf	exon	7471332	7471387	.	+	.	gene_id "AF:chr1H:7471332:7471387-7473610:7472266:7472431-7473610:+"; transcript_id "AF:chr1H:7471332:7471387-7473610:7472266:7472431-7473610:+:alternative1";
chr1H	PanBaRT20_trans_aveTPM10.gtf	exon	7473610	7473710	.	+	.	gene_id "AF:chr1H:7471332:7471387-7473610:7472266:7472431-7473610:+"; transcript_id "AF:chr1H:7471332:7471387-7473610:7472266:7472431-7473610:+:alternative1";
chr1H	PanBaRT20_trans_aveTPM10.gtf	exon	7472266	7472431	.	+	.	gene_id "AF:chr1H:7471332:7471387-7473610:7472266:7472431-7473610:+"; transcript_id "AF:chr1H:7471332:7471387-7473610:7472266:7472431-7473610:+:alternative2";
chr1H	PanBaRT20_trans_aveTPM10.gtf	exon	7473610	7473710	.	+	.	gene_id "AF:chr1H:7471332:7471387-7473610:7472266:7472431-7473610:+"; transcript_id "AF:chr1H:7471332:7471387-7473610:7472266:7472431-7473610:+:alternative2";
chr1H	PanBaRT20_trans_aveTPM10.gtf	exon	10852714	10852798	.	+	.	gene_id "AF:chr1H:10852714:10852798-10856007:10855291:10855339-10856007:+"; transcript_id "AF:chr1H:10852714:10852798-10856007:10855291:10855339-10856007:+:alternative1";
chr1H	PanBaRT20_trans_aveTPM10.gtf	exon	10856007	10856107	.	+	.	gene_id "AF:chr1H:10852714:10852798-10856007:10855291:10855339-10856007:+"; transcript_id "AF:chr1H:10852714:10852798-10856007:10855291:10855339-10856007:+:alternative1";
chr1H	PanBaRT20_trans_aveTPM10.gtf	exon	10855291	10855339	.	+	.	gene_id "AF:chr1H:10852714:10852798-10856007:10855291:10855339-10856007:+"; transcript_id "AF:chr1H:10852714:10852798-10856007:10855291:10855339-10856007:+:alternative2";
chr1H	PanBaRT20_trans_aveTPM10.gtf	exon	10856007	10856107	.	+	.	gene_id "AF:chr1H:10852714:10852798-10856007:10855291:10855339-10856007:+"; transcript_id "AF:chr1H:10852714:10852798-10856007:10855291:10855339-10856007:+:alternative2";
chr2H	PanBaRT20_trans_aveTPM10.gtf	exon	476172414	476172514	.	-	.	gene_id "AF:chr2H:476172514-476173180:476173340:476172514-476173361:476173510:-"; transcript_id "AF:chr2H:476172514-476173180:476173340:476172514-476173361:476173510:-:alternative2";
chr2H	PanBaRT20_trans_aveTPM10.gtf	exon	476173180	476173340	.	-	.	gene_id "AF:chr2H:476172514-476173180:476173340:476172514-476173361:476173510:-"; transcript_id "AF:chr2H:476172514-476173180:476173340:476172514-476173361:476173510:-:alternative2";
chr2H	PanBaRT20_trans_aveTPM10.gtf	exon	476172414	476172514	.	-	.	gene_id "AF:chr2H:476172514-476173180:476173340:476172514-476173361:476173510:-"; transcript_id "AF:chr2H:476172514-476173180:476173340:476172514-476173361:476173510:-:alternative1";
chr2H	PanBaRT20_trans_aveTPM10.gtf	exon	476173361	476173510	.	-	.	gene_id "AF:chr2H:476172514-476173180:476173340:476172514-476173361:476173510:-"; transcript_id "AF:chr2H:476172514-476173180:476173340:476172514-476173361:476173510:-:alternative1";
chr2H	PanBaRT20_trans_aveTPM10.gtf	exon	683462859	683463619	.	+	.	gene_id "AF:chr2H:683462859:683463619-683474560:683472076:683472479-683474560:+"; transcript_id "AF:chr2H:683462859:683463619-683474560:683472076:683472479-683474560:+:alternative1";
chr2H	PanBaRT20_trans_aveTPM10.gtf	exon	683474560	683474660	.	+	.	gene_id "AF:chr2H:683462859:683463619-683474560:683472076:683472479-683474560:+"; transcript_id "AF:chr2H:683462859:683463619-683474560:683472076:683472479-683474560:+:alternative1";
chr2H	PanBaRT20_trans_aveTPM10.gtf	exon	683472076	683472479	.	+	.	gene_id "AF:chr2H:683462859:683463619-683474560:683472076:683472479-683474560:+"; transcript_id "AF:chr2H:683462859:683463619-683474560:683472076:683472479-683474560:+:alternative2";
chr2H	PanBaRT20_trans_aveTPM10.gtf	exon	683474560	683474660	.	+	.	gene_id "AF:chr2H:683462859:683463619-683474560:683472076:683472479-683474560:+"; transcript_id "AF:chr2H:683462859:683463619-683474560:683472076:683472479-683474560:+:alternative2";
chr2H	PanBaRT20_trans_aveTPM10.gtf	exon	683462859	683463619	.	+	.	gene_id "AF:chr2H:683462859:683463619-683474560:683472080:683472345-683474560:+"; transcript_id "AF:chr2H:683462859:683463619-683474560:683472080:683472345-683474560:+:alternative1";
chr2H	PanBaRT20_trans_aveTPM10.gtf	exon	683474560	683474660	.	+	.	gene_id "AF:chr2H:683462859:683463619-683474560:683472080:683472345-683474560:+"; transcript_id "AF:chr2H:683462859:683463619-683474560:683472080:683472345-683474560:+:alternative1";
chr2H	PanBaRT20_trans_aveTPM10.gtf	exon	683472080	683472345	.	+	.	gene_id "AF:chr2H:683462859:683463619-683474560:683472080:683472345-683474560:+"; transcript_id "AF:chr2H:683462859:683463619-683474560:683472080:683472345-683474560:+:alternative2";
chr2H	PanBaRT20_trans_aveTPM10.gtf	exon	683474560	683474660	.	+	.	gene_id "AF:chr2H:683462859:683463619-683474560:683472080:683472345-683474560:+"; transcript_id "AF:chr2H:683462859:683463619-683474560:683472080:683472345-683474560:+:alternative2";
chr3H	PanBaRT20_trans_aveTPM10.gtf	exon	629343246	629343346	.	-	.	gene_id "AF:chr3H:629343346-629344466:629344526:629343346-629344529:629344567:-"; transcript_id "AF:chr3H:629343346-629344466:629344526:629343346-629344529:629344567:-:alternative2";
chr3H	PanBaRT20_trans_aveTPM10.gtf	exon	629344466	629344526	.	-	.	gene_id "AF:chr3H:629343346-629344466:629344526:629343346-629344529:629344567:-"; transcript_id "AF:chr3H:629343346-629344466:629344526:629343346-629344529:629344567:-:alternative2";
chr3H	PanBaRT20_trans_aveTPM10.gtf	exon	629343246	629343346	.	-	.	gene_id "AF:chr3H:629343346-629344466:629344526:629343346-629344529:629344567:-"; transcript_id "AF:chr3H:629343346-629344466:629344526:629343346-629344529:629344567:-:alternative1";
chr3H	PanBaRT20_trans_aveTPM10.gtf	exon	629344529	629344567	.	-	.	gene_id "AF:chr3H:629343346-629344466:629344526:629343346-629344529:629344567:-"; transcript_id "AF:chr3H:629343346-629344466:629344526:629343346-629344529:629344567:-:alternative1";
chr3H	PanBaRT20_trans_aveTPM10.gtf	exon	629343246	629343346	.	-	.	gene_id "AF:chr3H:629343346-629344239:629344526:629343346-629344529:629344567:-"; transcript_id "AF:chr3H:629343346-629344239:629344526:629343346-629344529:629344567:-:alternative2";
chr3H	PanBaRT20_trans_aveTPM10.gtf	exon	629344239	629344526	.	-	.	gene_id "AF:chr3H:629343346-629344239:629344526:629343346-629344529:629344567:-"; transcript_id "AF:chr3H:629343346-629344239:629344526:629343346-629344529:629344567:-:alternative2";
chr3H	PanBaRT20_trans_aveTPM10.gtf	exon	629343246	629343346	.	-	.	gene_id "AF:chr3H:629343346-629344239:629344526:629343346-629344529:629344567:-"; transcript_id "AF:chr3H:629343346-629344239:629344526:629343346-629344529:629344567:-:alternative1";
chr3H	PanBaRT20_trans_aveTPM10.gtf	exon	629344529	629344567	.	-	.	gene_id "AF:chr3H:629343346-629344239:629344526:629343346-629344529:629344567:-"; transcript_id "AF:chr3H:629343346-629344239:629344526:629343346-629344529:629344567:-:alternative1";
chr3H	PanBaRT20_trans_aveTPM10.gtf	exon	23107443	23107718	.	+	.	gene_id "AF:chr3H:23107443:23107718-23111568:23110925:23111249-23111568:+"; transcript_id "AF:chr3H:23107443:23107718-23111568:23110925:23111249-23111568:+:alternative1";
chr3H	PanBaRT20_trans_aveTPM10.gtf	exon	23111568	23111668	.	+	.	gene_id "AF:chr3H:23107443:23107718-23111568:23110925:23111249-23111568:+"; transcript_id "AF:chr3H:23107443:23107718-23111568:23110925:23111249-23111568:+:alternative1";
chr3H	PanBaRT20_trans_aveTPM10.gtf	exon	23110925	23111249	.	+	.	gene_id "AF:chr3H:23107443:23107718-23111568:23110925:23111249-23111568:+"; transcript_id "AF:chr3H:23107443:23107718-23111568:23110925:23111249-23111568:+:alternative2";
chr3H	PanBaRT20_trans_aveTPM10.gtf	exon	23111568	23111668	.	+	.	gene_id "AF:chr3H:23107443:23107718-23111568:23110925:23111249-23111568:+"; transcript_id "AF:chr3H:23107443:23107718-23111568:23110925:23111249-23111568:+:alternative2";
chr3H	PanBaRT20_trans_aveTPM10.gtf	exon	87417608	87417838	.	+	.	gene_id "AF:chr3H:87417608:87417838-87418278:87418146:87418217-87418278:+"; transcript_id "AF:chr3H:87417608:87417838-87418278:87418146:87418217-87418278:+:alternative1";
chr3H	PanBaRT20_trans_aveTPM10.gtf	exon	87418278	87418378	.	+	.	gene_id "AF:chr3H:87417608:87417838-87418278:87418146:87418217-87418278:+"; transcript_id "AF:chr3H:87417608:87417838-87418278:87418146:87418217-87418278:+:alternative1";
chr3H	PanBaRT20_trans_aveTPM10.gtf	exon	87418146	87418217	.	+	.	gene_id "AF:chr3H:87417608:87417838-87418278:87418146:87418217-87418278:+"; transcript_id "AF:chr3H:87417608:87417838-87418278:87418146:87418217-87418278:+:alternative2";
chr3H	PanBaRT20_trans_aveTPM10.gtf	exon	87418278	87418378	.	+	.	gene_id "AF:chr3H:87417608:87417838-87418278:87418146:87418217-87418278:+"; transcript_id "AF:chr3H:87417608:87417838-87418278:87418146:87418217-87418278:+:alternative2";
chr3H	PanBaRT20_trans_aveTPM10.gtf	exon	506906919	506907028	.	+	.	gene_id "AF:chr3H:506906919:506907028-506915539:506914775:506915082-506915539:+"; transcript_id "AF:chr3H:506906919:506907028-506915539:506914775:506915082-506915539:+:alternative1";
chr3H	PanBaRT20_trans_aveTPM10.gtf	exon	506915539	506915639	.	+	.	gene_id "AF:chr3H:506906919:506907028-506915539:506914775:506915082-506915539:+"; transcript_id "AF:chr3H:506906919:506907028-506915539:506914775:506915082-506915539:+:alternative1";
chr3H	PanBaRT20_trans_aveTPM10.gtf	exon	506914775	506915082	.	+	.	gene_id "AF:chr3H:506906919:506907028-506915539:506914775:506915082-506915539:+"; transcript_id "AF:chr3H:506906919:506907028-506915539:506914775:506915082-506915539:+:alternative2";
chr3H	PanBaRT20_trans_aveTPM10.gtf	exon	506915539	506915639	.	+	.	gene_id "AF:chr3H:506906919:506907028-506915539:506914775:506915082-506915539:+"; transcript_id "AF:chr3H:506906919:506907028-506915539:506914775:506915082-506915539:+:alternative2";
chr4H	PanBaRT20_trans_aveTPM10.gtf	exon	638991259	638991359	.	-	.	gene_id "AF:chr4H:638991359-638991496:638991588:638991359-638992337:638992798:-"; transcript_id "AF:chr4H:638991359-638991496:638991588:638991359-638992337:638992798:-:alternative2";
chr4H	PanBaRT20_trans_aveTPM10.gtf	exon	638991496	638991588	.	-	.	gene_id "AF:chr4H:638991359-638991496:638991588:638991359-638992337:638992798:-"; transcript_id "AF:chr4H:638991359-638991496:638991588:638991359-638992337:638992798:-:alternative2";
chr4H	PanBaRT20_trans_aveTPM10.gtf	exon	638991259	638991359	.	-	.	gene_id "AF:chr4H:638991359-638991496:638991588:638991359-638992337:638992798:-"; transcript_id "AF:chr4H:638991359-638991496:638991588:638991359-638992337:638992798:-:alternative1";
chr4H	PanBaRT20_trans_aveTPM10.gtf	exon	638992337	638992798	.	-	.	gene_id "AF:chr4H:638991359-638991496:638991588:638991359-638992337:638992798:-"; transcript_id "AF:chr4H:638991359-638991496:638991588:638991359-638992337:638992798:-:alternative1";
chr4H	PanBaRT20_trans_aveTPM10.gtf	exon	23445534	23446215	.	+	.	gene_id "AF:chr4H:23445534:23446215-23447626:23446919:23446997-23447626:+"; transcript_id "AF:chr4H:23445534:23446215-23447626:23446919:23446997-23447626:+:alternative1";
chr4H	PanBaRT20_trans_aveTPM10.gtf	exon	23447626	23447726	.	+	.	gene_id "AF:chr4H:23445534:23446215-23447626:23446919:23446997-23447626:+"; transcript_id "AF:chr4H:23445534:23446215-23447626:23446919:23446997-23447626:+:alternative1";
chr4H	PanBaRT20_trans_aveTPM10.gtf	exon	23446919	23446997	.	+	.	gene_id "AF:chr4H:23445534:23446215-23447626:23446919:23446997-23447626:+"; transcript_id "AF:chr4H:23445534:23446215-23447626:23446919:23446997-23447626:+:alternative2";
chr4H	PanBaRT20_trans_aveTPM10.gtf	exon	23447626	23447726	.	+	.	gene_id "AF:chr4H:23445534:23446215-23447626:23446919:23446997-23447626:+"; transcript_id "AF:chr4H:23445534:23446215-23447626:23446919:23446997-23447626:+:alternative2";
chr4H	PanBaRT20_trans_aveTPM10.gtf	exon	465611067	465611518	.	+	.	gene_id "AF:chr4H:465611067:465611518-465613175:465612630:465612966-465613175:+"; transcript_id "AF:chr4H:465611067:465611518-465613175:465612630:465612966-465613175:+:alternative1";
chr4H	PanBaRT20_trans_aveTPM10.gtf	exon	465613175	465613275	.	+	.	gene_id "AF:chr4H:465611067:465611518-465613175:465612630:465612966-465613175:+"; transcript_id "AF:chr4H:465611067:465611518-465613175:465612630:465612966-465613175:+:alternative1";
chr4H	PanBaRT20_trans_aveTPM10.gtf	exon	465612630	465612966	.	+	.	gene_id "AF:chr4H:465611067:465611518-465613175:465612630:465612966-465613175:+"; transcript_id "AF:chr4H:465611067:465611518-465613175:465612630:465612966-465613175:+:alternative2";
chr4H	PanBaRT20_trans_aveTPM10.gtf	exon	465613175	465613275	.	+	.	gene_id "AF:chr4H:465611067:465611518-465613175:465612630:465612966-465613175:+"; transcript_id "AF:chr4H:465611067:465611518-465613175:465612630:465612966-465613175:+:alternative2";
chr4H	PanBaRT20_trans_aveTPM10.gtf	exon	465611067	465611518	.	+	.	gene_id "AF:chr4H:465611067:465611518-465613175:465612635:465612966-465613175:+"; transcript_id "AF:chr4H:465611067:465611518-465613175:465612635:465612966-465613175:+:alternative1";
chr4H	PanBaRT20_trans_aveTPM10.gtf	exon	465613175	465613275	.	+	.	gene_id "AF:chr4H:465611067:465611518-465613175:465612635:465612966-465613175:+"; transcript_id "AF:chr4H:465611067:465611518-465613175:465612635:465612966-465613175:+:alternative1";
chr4H	PanBaRT20_trans_aveTPM10.gtf	exon	465612635	465612966	.	+	.	gene_id "AF:chr4H:465611067:465611518-465613175:465612635:465612966-465613175:+"; transcript_id "AF:chr4H:465611067:465611518-465613175:465612635:465612966-465613175:+:alternative2";
chr4H	PanBaRT20_trans_aveTPM10.gtf	exon	465613175	465613275	.	+	.	gene_id "AF:chr4H:465611067:465611518-465613175:465612635:465612966-465613175:+"; transcript_id "AF:chr4H:465611067:465611518-465613175:465612635:465612966-465613175:+:alternative2";
chr5H	PanBaRT20_trans_aveTPM10.gtf	exon	592859023	592859123	.	-	.	gene_id "AF:chr5H:592859123-592860927:592861189:592859123-592862505:592862762:-"; transcript_id "AF:chr5H:592859123-592860927:592861189:592859123-592862505:592862762:-:alternative2";
chr5H	PanBaRT20_trans_aveTPM10.gtf	exon	592860927	592861189	.	-	.	gene_id "AF:chr5H:592859123-592860927:592861189:592859123-592862505:592862762:-"; transcript_id "AF:chr5H:592859123-592860927:592861189:592859123-592862505:592862762:-:alternative2";
chr5H	PanBaRT20_trans_aveTPM10.gtf	exon	592859023	592859123	.	-	.	gene_id "AF:chr5H:592859123-592860927:592861189:592859123-592862505:592862762:-"; transcript_id "AF:chr5H:592859123-592860927:592861189:592859123-592862505:592862762:-:alternative1";
chr5H	PanBaRT20_trans_aveTPM10.gtf	exon	592862505	592862762	.	-	.	gene_id "AF:chr5H:592859123-592860927:592861189:592859123-592862505:592862762:-"; transcript_id "AF:chr5H:592859123-592860927:592861189:592859123-592862505:592862762:-:alternative1";
chr5H	PanBaRT20_trans_aveTPM10.gtf	exon	592859023	592859123	.	-	.	gene_id "AF:chr5H:592859123-592860927:592861189:592859123-592862505:592862759:-"; transcript_id "AF:chr5H:592859123-592860927:592861189:592859123-592862505:592862759:-:alternative2";
chr5H	PanBaRT20_trans_aveTPM10.gtf	exon	592860927	592861189	.	-	.	gene_id "AF:chr5H:592859123-592860927:592861189:592859123-592862505:592862759:-"; transcript_id "AF:chr5H:592859123-592860927:592861189:592859123-592862505:592862759:-:alternative2";
chr5H	PanBaRT20_trans_aveTPM10.gtf	exon	592859023	592859123	.	-	.	gene_id "AF:chr5H:592859123-592860927:592861189:592859123-592862505:592862759:-"; transcript_id "AF:chr5H:592859123-592860927:592861189:592859123-592862505:592862759:-:alternative1";
chr5H	PanBaRT20_trans_aveTPM10.gtf	exon	592862505	592862759	.	-	.	gene_id "AF:chr5H:592859123-592860927:592861189:592859123-592862505:592862759:-"; transcript_id "AF:chr5H:592859123-592860927:592861189:592859123-592862505:592862759:-:alternative1";
chr5H	PanBaRT20_trans_aveTPM10.gtf	exon	575045477	575045608	.	+	.	gene_id "AF:chr5H:575045477:575045608-575047725:575047029:575047167-575047725:+"; transcript_id "AF:chr5H:575045477:575045608-575047725:575047029:575047167-575047725:+:alternative1";
chr5H	PanBaRT20_trans_aveTPM10.gtf	exon	575047725	575047825	.	+	.	gene_id "AF:chr5H:575045477:575045608-575047725:575047029:575047167-575047725:+"; transcript_id "AF:chr5H:575045477:575045608-575047725:575047029:575047167-575047725:+:alternative1";
chr5H	PanBaRT20_trans_aveTPM10.gtf	exon	575047029	575047167	.	+	.	gene_id "AF:chr5H:575045477:575045608-575047725:575047029:575047167-575047725:+"; transcript_id "AF:chr5H:575045477:575045608-575047725:575047029:575047167-575047725:+:alternative2";
chr5H	PanBaRT20_trans_aveTPM10.gtf	exon	575047725	575047825	.	+	.	gene_id "AF:chr5H:575045477:575045608-575047725:575047029:575047167-575047725:+"; transcript_id "AF:chr5H:575045477:575045608-575047725:575047029:575047167-575047725:+:alternative2";
chr6H	PanBaRT20_trans_aveTPM10.gtf	exon	109765161	109765261	.	-	.	gene_id "AF:chr6H:109765261-109766207:109766525:109765261-109775313:109775403:-"; transcript_id "AF:chr6H:109765261-109766207:109766525:109765261-109775313:109775403:-:alternative2";
chr6H	PanBaRT20_trans_aveTPM10.gtf	exon	109766207	109766525	.	-	.	gene_id "AF:chr6H:109765261-109766207:109766525:109765261-109775313:109775403:-"; transcript_id "AF:chr6H:109765261-109766207:109766525:109765261-109775313:109775403:-:alternative2";
chr6H	PanBaRT20_trans_aveTPM10.gtf	exon	109765161	109765261	.	-	.	gene_id "AF:chr6H:109765261-109766207:109766525:109765261-109775313:109775403:-"; transcript_id "AF:chr6H:109765261-109766207:109766525:109765261-109775313:109775403:-:alternative1";
chr6H	PanBaRT20_trans_aveTPM10.gtf	exon	109775313	109775403	.	-	.	gene_id "AF:chr6H:109765261-109766207:109766525:109765261-109775313:109775403:-"; transcript_id "AF:chr6H:109765261-109766207:109766525:109765261-109775313:109775403:-:alternative1";
chr6H	PanBaRT20_trans_aveTPM10.gtf	exon	109765161	109765261	.	-	.	gene_id "AF:chr6H:109765261-109766207:109766442:109765261-109775313:109775403:-"; transcript_id "AF:chr6H:109765261-109766207:109766442:109765261-109775313:109775403:-:alternative2";
chr6H	PanBaRT20_trans_aveTPM10.gtf	exon	109766207	109766442	.	-	.	gene_id "AF:chr6H:109765261-109766207:109766442:109765261-109775313:109775403:-"; transcript_id "AF:chr6H:109765261-109766207:109766442:109765261-109775313:109775403:-:alternative2";
chr6H	PanBaRT20_trans_aveTPM10.gtf	exon	109765161	109765261	.	-	.	gene_id "AF:chr6H:109765261-109766207:109766442:109765261-109775313:109775403:-"; transcript_id "AF:chr6H:109765261-109766207:109766442:109765261-109775313:109775403:-:alternative1";
chr6H	PanBaRT20_trans_aveTPM10.gtf	exon	109775313	109775403	.	-	.	gene_id "AF:chr6H:109765261-109766207:109766442:109765261-109775313:109775403:-"; transcript_id "AF:chr6H:109765261-109766207:109766442:109765261-109775313:109775403:-:alternative1";
chr6H	PanBaRT20_trans_aveTPM10.gtf	exon	129622520	129622620	.	-	.	gene_id "AF:chr6H:129622620-129622827:129622894:129622620-129623591:129623883:-"; transcript_id "AF:chr6H:129622620-129622827:129622894:129622620-129623591:129623883:-:alternative2";
chr6H	PanBaRT20_trans_aveTPM10.gtf	exon	129622827	129622894	.	-	.	gene_id "AF:chr6H:129622620-129622827:129622894:129622620-129623591:129623883:-"; transcript_id "AF:chr6H:129622620-129622827:129622894:129622620-129623591:129623883:-:alternative2";
chr6H	PanBaRT20_trans_aveTPM10.gtf	exon	129622520	129622620	.	-	.	gene_id "AF:chr6H:129622620-129622827:129622894:129622620-129623591:129623883:-"; transcript_id "AF:chr6H:129622620-129622827:129622894:129622620-129623591:129623883:-:alternative1";
chr6H	PanBaRT20_trans_aveTPM10.gtf	exon	129623591	129623883	.	-	.	gene_id "AF:chr6H:129622620-129622827:129622894:129622620-129623591:129623883:-"; transcript_id "AF:chr6H:129622620-129622827:129622894:129622620-129623591:129623883:-:alternative1";
chr6H	PanBaRT20_trans_aveTPM10.gtf	exon	540943652	540944124	.	+	.	gene_id "AF:chr6H:540943652:540944124-540958364:540957303:540957757-540958364:+"; transcript_id "AF:chr6H:540943652:540944124-540958364:540957303:540957757-540958364:+:alternative1";
chr6H	PanBaRT20_trans_aveTPM10.gtf	exon	540958364	540958464	.	+	.	gene_id "AF:chr6H:540943652:540944124-540958364:540957303:540957757-540958364:+"; transcript_id "AF:chr6H:540943652:540944124-540958364:540957303:540957757-540958364:+:alternative1";
chr6H	PanBaRT20_trans_aveTPM10.gtf	exon	540957303	540957757	.	+	.	gene_id "AF:chr6H:540943652:540944124-540958364:540957303:540957757-540958364:+"; transcript_id "AF:chr6H:540943652:540944124-540958364:540957303:540957757-540958364:+:alternative2";
chr6H	PanBaRT20_trans_aveTPM10.gtf	exon	540958364	540958464	.	+	.	gene_id "AF:chr6H:540943652:540944124-540958364:540957303:540957757-540958364:+"; transcript_id "AF:chr6H:540943652:540944124-540958364:540957303:540957757-540958364:+:alternative2";
chr6H	PanBaRT20_trans_aveTPM10.gtf	exon	550081621	550082191	.	+	.	gene_id "AF:chr6H:550081621:550082191-550086017:550082210:550082402-550086017:+"; transcript_id "AF:chr6H:550081621:550082191-550086017:550082210:550082402-550086017:+:alternative1";
chr6H	PanBaRT20_trans_aveTPM10.gtf	exon	550086017	550086117	.	+	.	gene_id "AF:chr6H:550081621:550082191-550086017:550082210:550082402-550086017:+"; transcript_id "AF:chr6H:550081621:550082191-550086017:550082210:550082402-550086017:+:alternative1";
chr6H	PanBaRT20_trans_aveTPM10.gtf	exon	550082210	550082402	.	+	.	gene_id "AF:chr6H:550081621:550082191-550086017:550082210:550082402-550086017:+"; transcript_id "AF:chr6H:550081621:550082191-550086017:550082210:550082402-550086017:+:alternative2";
chr6H	PanBaRT20_trans_aveTPM10.gtf	exon	550086017	550086117	.	+	.	gene_id "AF:chr6H:550081621:550082191-550086017:550082210:550082402-550086017:+"; transcript_id "AF:chr6H:550081621:550082191-550086017:550082210:550082402-550086017:+:alternative2";
chr7H	PanBaRT20_trans_aveTPM10.gtf	exon	62914172	62914272	.	-	.	gene_id "AF:chr7H:62914272-62915535:62915799:62914272-62915829:62915849:-"; transcript_id "AF:chr7H:62914272-62915535:62915799:62914272-62915829:62915849:-:alternative2";
chr7H	PanBaRT20_trans_aveTPM10.gtf	exon	62915535	62915799	.	-	.	gene_id "AF:chr7H:62914272-62915535:62915799:62914272-62915829:62915849:-"; transcript_id "AF:chr7H:62914272-62915535:62915799:62914272-62915829:62915849:-:alternative2";
chr7H	PanBaRT20_trans_aveTPM10.gtf	exon	62914172	62914272	.	-	.	gene_id "AF:chr7H:62914272-62915535:62915799:62914272-62915829:62915849:-"; transcript_id "AF:chr7H:62914272-62915535:62915799:62914272-62915829:62915849:-:alternative1";
chr7H	PanBaRT20_trans_aveTPM10.gtf	exon	62915829	62915849	.	-	.	gene_id "AF:chr7H:62914272-62915535:62915799:62914272-62915829:62915849:-"; transcript_id "AF:chr7H:62914272-62915535:62915799:62914272-62915829:62915849:-:alternative1";
chr7H	PanBaRT20_trans_aveTPM10.gtf	exon	79457376	79457476	.	-	.	gene_id "AF:chr7H:79457476-79458335:79458358:79457476-79459603:79459700:-"; transcript_id "AF:chr7H:79457476-79458335:79458358:79457476-79459603:79459700:-:alternative2";
chr7H	PanBaRT20_trans_aveTPM10.gtf	exon	79458335	79458358	.	-	.	gene_id "AF:chr7H:79457476-79458335:79458358:79457476-79459603:79459700:-"; transcript_id "AF:chr7H:79457476-79458335:79458358:79457476-79459603:79459700:-:alternative2";
chr7H	PanBaRT20_trans_aveTPM10.gtf	exon	79457376	79457476	.	-	.	gene_id "AF:chr7H:79457476-79458335:79458358:79457476-79459603:79459700:-"; transcript_id "AF:chr7H:79457476-79458335:79458358:79457476-79459603:79459700:-:alternative1";
chr7H	PanBaRT20_trans_aveTPM10.gtf	exon	79459603	79459700	.	-	.	gene_id "AF:chr7H:79457476-79458335:79458358:79457476-79459603:79459700:-"; transcript_id "AF:chr7H:79457476-79458335:79458358:79457476-79459603:79459700:-:alternative1";
chr7H	PanBaRT20_trans_aveTPM10.gtf	exon	79457376	79457476	.	-	.	gene_id "AF:chr7H:79457476-79458335:79458392:79457476-79459603:79459700:-"; transcript_id "AF:chr7H:79457476-79458335:79458392:79457476-79459603:79459700:-:alternative2";
chr7H	PanBaRT20_trans_aveTPM10.gtf	exon	79458335	79458392	.	-	.	gene_id "AF:chr7H:79457476-79458335:79458392:79457476-79459603:79459700:-"; transcript_id "AF:chr7H:79457476-79458335:79458392:79457476-79459603:79459700:-:alternative2";
chr7H	PanBaRT20_trans_aveTPM10.gtf	exon	79457376	79457476	.	-	.	gene_id "AF:chr7H:79457476-79458335:79458392:79457476-79459603:79459700:-"; transcript_id "AF:chr7H:79457476-79458335:79458392:79457476-79459603:79459700:-:alternative1";
chr7H	PanBaRT20_trans_aveTPM10.gtf	exon	79459603	79459700	.	-	.	gene_id "AF:chr7H:79457476-79458335:79458392:79457476-79459603:79459700:-"; transcript_id "AF:chr7H:79457476-79458335:79458392:79457476-79459603:79459700:-:alternative1";
chr7H	PanBaRT20_trans_aveTPM10.gtf	exon	368961035	368961135	.	-	.	gene_id "AF:chr7H:368961135-368961392:368961436:368961135-368961441:368961546:-"; transcript_id "AF:chr7H:368961135-368961392:368961436:368961135-368961441:368961546:-:alternative2";
chr7H	PanBaRT20_trans_aveTPM10.gtf	exon	368961392	368961436	.	-	.	gene_id "AF:chr7H:368961135-368961392:368961436:368961135-368961441:368961546:-"; transcript_id "AF:chr7H:368961135-368961392:368961436:368961135-368961441:368961546:-:alternative2";
chr7H	PanBaRT20_trans_aveTPM10.gtf	exon	368961035	368961135	.	-	.	gene_id "AF:chr7H:368961135-368961392:368961436:368961135-368961441:368961546:-"; transcript_id "AF:chr7H:368961135-368961392:368961436:368961135-368961441:368961546:-:alternative1";
chr7H	PanBaRT20_trans_aveTPM10.gtf	exon	368961441	368961546	.	-	.	gene_id "AF:chr7H:368961135-368961392:368961436:368961135-368961441:368961546:-"; transcript_id "AF:chr7H:368961135-368961392:368961436:368961135-368961441:368961546:-:alternative1";
chr7H	PanBaRT20_trans_aveTPM10.gtf	exon	375788725	375788825	.	-	.	gene_id "AF:chr7H:375788825-375789926:375790253:375788825-375791641:375791827:-"; transcript_id "AF:chr7H:375788825-375789926:375790253:375788825-375791641:375791827:-:alternative2";
chr7H	PanBaRT20_trans_aveTPM10.gtf	exon	375789926	375790253	.	-	.	gene_id "AF:chr7H:375788825-375789926:375790253:375788825-375791641:375791827:-"; transcript_id "AF:chr7H:375788825-375789926:375790253:375788825-375791641:375791827:-:alternative2";
chr7H	PanBaRT20_trans_aveTPM10.gtf	exon	375788725	375788825	.	-	.	gene_id "AF:chr7H:375788825-375789926:375790253:375788825-375791641:375791827:-"; transcript_id "AF:chr7H:375788825-375789926:375790253:375788825-375791641:375791827:-:alternative1";
chr7H	PanBaRT20_trans_aveTPM10.gtf	exon	375791641	375791827	.	-	.	gene_id "AF:chr7H:375788825-375789926:375790253:375788825-375791641:375791827:-"; transcript_id "AF:chr7H:375788825-375789926:375790253:375788825-375791641:375791827:-:alternative1";
chr7H	PanBaRT20_trans_aveTPM10.gtf	exon	647397900	647398000	.	-	.	gene_id "AF:chr7H:647398000-647398086:647398625:647398000-647411341:647411710:-"; transcript_id "AF:chr7H:647398000-647398086:647398625:647398000-647411341:647411710:-:alternative2";
chr7H	PanBaRT20_trans_aveTPM10.gtf	exon	647398086	647398625	.	-	.	gene_id "AF:chr7H:647398000-647398086:647398625:647398000-647411341:647411710:-"; transcript_id "AF:chr7H:647398000-647398086:647398625:647398000-647411341:647411710:-:alternative2";
chr7H	PanBaRT20_trans_aveTPM10.gtf	exon	647397900	647398000	.	-	.	gene_id "AF:chr7H:647398000-647398086:647398625:647398000-647411341:647411710:-"; transcript_id "AF:chr7H:647398000-647398086:647398625:647398000-647411341:647411710:-:alternative1";
chr7H	PanBaRT20_trans_aveTPM10.gtf	exon	647411341	647411710	.	-	.	gene_id "AF:chr7H:647398000-647398086:647398625:647398000-647411341:647411710:-"; transcript_id "AF:chr7H:647398000-647398086:647398625:647398000-647411341:647411710:-:alternative1";
chr7H	PanBaRT20_trans_aveTPM10.gtf	exon	83369925	83370282	.	+	.	gene_id "AF:chr7H:83369925:83370282-83384514:83384065:83384432-83384514:+"; transcript_id "AF:chr7H:83369925:83370282-83384514:83384065:83384432-83384514:+:alternative1";
chr7H	PanBaRT20_trans_aveTPM10.gtf	exon	83384514	83384614	.	+	.	gene_id "AF:chr7H:83369925:83370282-83384514:83384065:83384432-83384514:+"; transcript_id "AF:chr7H:83369925:83370282-83384514:83384065:83384432-83384514:+:alternative1";
chr7H	PanBaRT20_trans_aveTPM10.gtf	exon	83384065	83384432	.	+	.	gene_id "AF:chr7H:83369925:83370282-83384514:83384065:83384432-83384514:+"; transcript_id "AF:chr7H:83369925:83370282-83384514:83384065:83384432-83384514:+:alternative2";
chr7H	PanBaRT20_trans_aveTPM10.gtf	exon	83384514	83384614	.	+	.	gene_id "AF:chr7H:83369925:83370282-83384514:83384065:83384432-83384514:+"; transcript_id "AF:chr7H:83369925:83370282-83384514:83384065:83384432-83384514:+:alternative2";
chr7H	PanBaRT20_trans_aveTPM10.gtf	exon	649762536	649762807	.	+	.	gene_id "AF:chr7H:649762536:649762807-649767095:649766361:649766694-649767095:+"; transcript_id "AF:chr7H:649762536:649762807-649767095:649766361:649766694-649767095:+:alternative1";
chr7H	PanBaRT20_trans_aveTPM10.gtf	exon	649767095	649767195	.	+	.	gene_id "AF:chr7H:649762536:649762807-649767095:649766361:649766694-649767095:+"; transcript_id "AF:chr7H:649762536:649762807-649767095:649766361:649766694-649767095:+:alternative1";
chr7H	PanBaRT20_trans_aveTPM10.gtf	exon	649766361	649766694	.	+	.	gene_id "AF:chr7H:649762536:649762807-649767095:649766361:649766694-649767095:+"; transcript_id "AF:chr7H:649762536:649762807-649767095:649766361:649766694-649767095:+:alternative2";
chr7H	PanBaRT20_trans_aveTPM10.gtf	exon	649767095	649767195	.	+	.	gene_id "AF:chr7H:649762536:649762807-649767095:649766361:649766694-649767095:+"; transcript_id "AF:chr7H:649762536:649762807-649767095:649766361:649766694-649767095:+:alternative2";
chr7H	PanBaRT20_trans_aveTPM10.gtf	exon	687633983	687634018	.	+	.	gene_id "AF:chr7H:687633983:687634018-687636056:687634534:687634635-687636056:+"; transcript_id "AF:chr7H:687633983:687634018-687636056:687634534:687634635-687636056:+:alternative1";
chr7H	PanBaRT20_trans_aveTPM10.gtf	exon	687636056	687636156	.	+	.	gene_id "AF:chr7H:687633983:687634018-687636056:687634534:687634635-687636056:+"; transcript_id "AF:chr7H:687633983:687634018-687636056:687634534:687634635-687636056:+:alternative1";
chr7H	PanBaRT20_trans_aveTPM10.gtf	exon	687634534	687634635	.	+	.	gene_id "AF:chr7H:687633983:687634018-687636056:687634534:687634635-687636056:+"; transcript_id "AF:chr7H:687633983:687634018-687636056:687634534:687634635-687636056:+:alternative2";
chr7H	PanBaRT20_trans_aveTPM10.gtf	exon	687636056	687636156	.	+	.	gene_id "AF:chr7H:687633983:687634018-687636056:687634534:687634635-687636056:+"; transcript_id "AF:chr7H:687633983:687634018-687636056:687634534:687634635-687636056:+:alternative2";
chr1H	PanBaRT20_trans_aveTPM10.gtf	exon	10852698	10852798	.	+	.	gene_id "AL:chr1H:10852798-10852937:10854006:10852798-10856007:10856418:+"; transcript_id "AL:chr1H:10852798-10852937:10854006:10852798-10856007:10856418:+:alternative2";
chr1H	PanBaRT20_trans_aveTPM10.gtf	exon	10852937	10854006	.	+	.	gene_id "AL:chr1H:10852798-10852937:10854006:10852798-10856007:10856418:+"; transcript_id "AL:chr1H:10852798-10852937:10854006:10852798-10856007:10856418:+:alternative2";
chr1H	PanBaRT20_trans_aveTPM10.gtf	exon	10852698	10852798	.	+	.	gene_id "AL:chr1H:10852798-10852937:10854006:10852798-10856007:10856418:+"; transcript_id "AL:chr1H:10852798-10852937:10854006:10852798-10856007:10856418:+:alternative1";
chr1H	PanBaRT20_trans_aveTPM10.gtf	exon	10856007	10856418	.	+	.	gene_id "AL:chr1H:10852798-10852937:10854006:10852798-10856007:10856418:+"; transcript_id "AL:chr1H:10852798-10852937:10854006:10852798-10856007:10856418:+:alternative1";
chr1H	PanBaRT20_trans_aveTPM10.gtf	exon	10852698	10852798	.	+	.	gene_id "AL:chr1H:10852798-10852909:10853337:10852798-10856007:10856418:+"; transcript_id "AL:chr1H:10852798-10852909:10853337:10852798-10856007:10856418:+:alternative2";
chr1H	PanBaRT20_trans_aveTPM10.gtf	exon	10852909	10853337	.	+	.	gene_id "AL:chr1H:10852798-10852909:10853337:10852798-10856007:10856418:+"; transcript_id "AL:chr1H:10852798-10852909:10853337:10852798-10856007:10856418:+:alternative2";
chr1H	PanBaRT20_trans_aveTPM10.gtf	exon	10852698	10852798	.	+	.	gene_id "AL:chr1H:10852798-10852909:10853337:10852798-10856007:10856418:+"; transcript_id "AL:chr1H:10852798-10852909:10853337:10852798-10856007:10856418:+:alternative1";
chr1H	PanBaRT20_trans_aveTPM10.gtf	exon	10856007	10856418	.	+	.	gene_id "AL:chr1H:10852798-10852909:10853337:10852798-10856007:10856418:+"; transcript_id "AL:chr1H:10852798-10852909:10853337:10852798-10856007:10856418:+:alternative1";
chr1H	PanBaRT20_trans_aveTPM10.gtf	exon	3246852	3247477	.	-	.	gene_id "AL:chr1H:3246852:3247477-3258862:3258148:3258766-3258862:-"; transcript_id "AL:chr1H:3246852:3247477-3258862:3258148:3258766-3258862:-:alternative1";
chr1H	PanBaRT20_trans_aveTPM10.gtf	exon	3258862	3258962	.	-	.	gene_id "AL:chr1H:3246852:3247477-3258862:3258148:3258766-3258862:-"; transcript_id "AL:chr1H:3246852:3247477-3258862:3258148:3258766-3258862:-:alternative1";
chr1H	PanBaRT20_trans_aveTPM10.gtf	exon	3258148	3258766	.	-	.	gene_id "AL:chr1H:3246852:3247477-3258862:3258148:3258766-3258862:-"; transcript_id "AL:chr1H:3246852:3247477-3258862:3258148:3258766-3258862:-:alternative2";
chr1H	PanBaRT20_trans_aveTPM10.gtf	exon	3258862	3258962	.	-	.	gene_id "AL:chr1H:3246852:3247477-3258862:3258148:3258766-3258862:-"; transcript_id "AL:chr1H:3246852:3247477-3258862:3258148:3258766-3258862:-:alternative2";
chr4H	PanBaRT20_trans_aveTPM10.gtf	exon	653766491	653766591	.	+	.	gene_id "AL:chr4H:653766591-653766723:653767460:653766591-653778108:653778847:+"; transcript_id "AL:chr4H:653766591-653766723:653767460:653766591-653778108:653778847:+:alternative2";
chr4H	PanBaRT20_trans_aveTPM10.gtf	exon	653766723	653767460	.	+	.	gene_id "AL:chr4H:653766591-653766723:653767460:653766591-653778108:653778847:+"; transcript_id "AL:chr4H:653766591-653766723:653767460:653766591-653778108:653778847:+:alternative2";
chr4H	PanBaRT20_trans_aveTPM10.gtf	exon	653766491	653766591	.	+	.	gene_id "AL:chr4H:653766591-653766723:653767460:653766591-653778108:653778847:+"; transcript_id "AL:chr4H:653766591-653766723:653767460:653766591-653778108:653778847:+:alternative1";
chr4H	PanBaRT20_trans_aveTPM10.gtf	exon	653778108	653778847	.	+	.	gene_id "AL:chr4H:653766591-653766723:653767460:653766591-653778108:653778847:+"; transcript_id "AL:chr4H:653766591-653766723:653767460:653766591-653778108:653778847:+:alternative1";
chr6H	PanBaRT20_trans_aveTPM10.gtf	exon	109764356	109765261	.	-	.	gene_id "AL:chr6H:109764356:109765261-109775313:109772192:109773733-109775313:-"; transcript_id "AL:chr6H:109764356:109765261-109775313:109772192:109773733-109775313:-:alternative1";
chr6H	PanBaRT20_trans_aveTPM10.gtf	exon	109775313	109775413	.	-	.	gene_id "AL:chr6H:109764356:109765261-109775313:109772192:109773733-109775313:-"; transcript_id "AL:chr6H:109764356:109765261-109775313:109772192:109773733-109775313:-:alternative1";
chr6H	PanBaRT20_trans_aveTPM10.gtf	exon	109772192	109773733	.	-	.	gene_id "AL:chr6H:109764356:109765261-109775313:109772192:109773733-109775313:-"; transcript_id "AL:chr6H:109764356:109765261-109775313:109772192:109773733-109775313:-:alternative2";
chr6H	PanBaRT20_trans_aveTPM10.gtf	exon	109775313	109775413	.	-	.	gene_id "AL:chr6H:109764356:109765261-109775313:109772192:109773733-109775313:-"; transcript_id "AL:chr6H:109764356:109765261-109775313:109772192:109773733-109775313:-:alternative2";
chr6H	PanBaRT20_trans_aveTPM10.gtf	exon	19614671	19614771	.	+	.	gene_id "AL:chr6H:19614771-19614895:19616048:19614771-19617873:19618248:+"; transcript_id "AL:chr6H:19614771-19614895:19616048:19614771-19617873:19618248:+:alternative2";
chr6H	PanBaRT20_trans_aveTPM10.gtf	exon	19614895	19616048	.	+	.	gene_id "AL:chr6H:19614771-19614895:19616048:19614771-19617873:19618248:+"; transcript_id "AL:chr6H:19614771-19614895:19616048:19614771-19617873:19618248:+:alternative2";
chr6H	PanBaRT20_trans_aveTPM10.gtf	exon	19614671	19614771	.	+	.	gene_id "AL:chr6H:19614771-19614895:19616048:19614771-19617873:19618248:+"; transcript_id "AL:chr6H:19614771-19614895:19616048:19614771-19617873:19618248:+:alternative1";
chr6H	PanBaRT20_trans_aveTPM10.gtf	exon	19617873	19618248	.	+	.	gene_id "AL:chr6H:19614771-19614895:19616048:19614771-19617873:19618248:+"; transcript_id "AL:chr6H:19614771-19614895:19616048:19614771-19617873:19618248:+:alternative1";
chr6H	PanBaRT20_trans_aveTPM10.gtf	exon	19614671	19614771	.	+	.	gene_id "AL:chr6H:19614771-19614895:19616048:19614771-19617873:19618621:+"; transcript_id "AL:chr6H:19614771-19614895:19616048:19614771-19617873:19618621:+:alternative2";
chr6H	PanBaRT20_trans_aveTPM10.gtf	exon	19614895	19616048	.	+	.	gene_id "AL:chr6H:19614771-19614895:19616048:19614771-19617873:19618621:+"; transcript_id "AL:chr6H:19614771-19614895:19616048:19614771-19617873:19618621:+:alternative2";
chr6H	PanBaRT20_trans_aveTPM10.gtf	exon	19614671	19614771	.	+	.	gene_id "AL:chr6H:19614771-19614895:19616048:19614771-19617873:19618621:+"; transcript_id "AL:chr6H:19614771-19614895:19616048:19614771-19617873:19618621:+:alternative1";
chr6H	PanBaRT20_trans_aveTPM10.gtf	exon	19617873	19618621	.	+	.	gene_id "AL:chr6H:19614771-19614895:19616048:19614771-19617873:19618621:+"; transcript_id "AL:chr6H:19614771-19614895:19616048:19614771-19617873:19618621:+:alternative1";
chr7H	PanBaRT20_trans_aveTPM10.gtf	exon	647397884	647398000	.	-	.	gene_id "AL:chr7H:647397884:647398000-647411341:647410657:647411255-647411341:-"; transcript_id "AL:chr7H:647397884:647398000-647411341:647410657:647411255-647411341:-:alternative1";
chr7H	PanBaRT20_trans_aveTPM10.gtf	exon	647411341	647411441	.	-	.	gene_id "AL:chr7H:647397884:647398000-647411341:647410657:647411255-647411341:-"; transcript_id "AL:chr7H:647397884:647398000-647411341:647410657:647411255-647411341:-:alternative1";
chr7H	PanBaRT20_trans_aveTPM10.gtf	exon	647410657	647411255	.	-	.	gene_id "AL:chr7H:647397884:647398000-647411341:647410657:647411255-647411341:-"; transcript_id "AL:chr7H:647397884:647398000-647411341:647410657:647411255-647411341:-:alternative2";
chr7H	PanBaRT20_trans_aveTPM10.gtf	exon	647411341	647411441	.	-	.	gene_id "AL:chr7H:647397884:647398000-647411341:647410657:647411255-647411341:-"; transcript_id "AL:chr7H:647397884:647398000-647411341:647410657:647411255-647411341:-:alternative2";
chr7H	PanBaRT20_trans_aveTPM10.gtf	exon	83370182	83370282	.	+	.	gene_id "AL:chr7H:83370282-83370364:83371037:83370282-83384514:83385117:+"; transcript_id "AL:chr7H:83370282-83370364:83371037:83370282-83384514:83385117:+:alternative2";
chr7H	PanBaRT20_trans_aveTPM10.gtf	exon	83370364	83371037	.	+	.	gene_id "AL:chr7H:83370282-83370364:83371037:83370282-83384514:83385117:+"; transcript_id "AL:chr7H:83370282-83370364:83371037:83370282-83384514:83385117:+:alternative2";
chr7H	PanBaRT20_trans_aveTPM10.gtf	exon	83370182	83370282	.	+	.	gene_id "AL:chr7H:83370282-83370364:83371037:83370282-83384514:83385117:+"; transcript_id "AL:chr7H:83370282-83370364:83371037:83370282-83384514:83385117:+:alternative1";
chr7H	PanBaRT20_trans_aveTPM10.gtf	exon	83384514	83385117	.	+	.	gene_id "AL:chr7H:83370282-83370364:83371037:83370282-83384514:83385117:+"; transcript_id "AL:chr7H:83370282-83370364:83371037:83370282-83384514:83385117:+:alternative1";
chr4H	PanBaRT20_trans_aveTPM10.gtf	exon	287001897	287001997	.	-	.	gene_id "MX:chr4H:287001997-287012787:287013055-287017831:287001997-287014507:287014926-287017831:-"; transcript_id "MX:chr4H:287001997-287012787:287013055-287017831:287001997-287014507:287014926-287017831:-:alternative1";
chr4H	PanBaRT20_trans_aveTPM10.gtf	exon	287012787	287013055	.	-	.	gene_id "MX:chr4H:287001997-287012787:287013055-287017831:287001997-287014507:287014926-287017831:-"; transcript_id "MX:chr4H:287001997-287012787:287013055-287017831:287001997-287014507:287014926-287017831:-:alternative1";
chr4H	PanBaRT20_trans_aveTPM10.gtf	exon	287017831	287017931	.	-	.	gene_id "MX:chr4H:287001997-287012787:287013055-287017831:287001997-287014507:287014926-287017831:-"; transcript_id "MX:chr4H:287001997-287012787:287013055-287017831:287001997-287014507:287014926-287017831:-:alternative1";
chr4H	PanBaRT20_trans_aveTPM10.gtf	exon	287001897	287001997	.	-	.	gene_id "MX:chr4H:287001997-287012787:287013055-287017831:287001997-287014507:287014926-287017831:-"; transcript_id "MX:chr4H:287001997-287012787:287013055-287017831:287001997-287014507:287014926-287017831:-:alternative2";
chr4H	PanBaRT20_trans_aveTPM10.gtf	exon	287014507	287014926	.	-	.	gene_id "MX:chr4H:287001997-287012787:287013055-287017831:287001997-287014507:287014926-287017831:-"; transcript_id "MX:chr4H:287001997-287012787:287013055-287017831:287001997-287014507:287014926-287017831:-:alternative2";
chr4H	PanBaRT20_trans_aveTPM10.gtf	exon	287017831	287017931	.	-	.	gene_id "MX:chr4H:287001997-287012787:287013055-287017831:287001997-287014507:287014926-287017831:-"; transcript_id "MX:chr4H:287001997-287012787:287013055-287017831:287001997-287014507:287014926-287017831:-:alternative2";
chr1H	PanBaRT20_trans_aveTPM10.gtf	exon	2151818	2152151	.	+	.	gene_id "RI:chr1H:2151818:2152151-2152230:2153494:+"; transcript_id "RI:chr1H:2151818:2152151-2152230:2153494:+:alternative2";
chr1H	PanBaRT20_trans_aveTPM10.gtf	exon	2152230	2153494	.	+	.	gene_id "RI:chr1H:2151818:2152151-2152230:2153494:+"; transcript_id "RI:chr1H:2151818:2152151-2152230:2153494:+:alternative2";
chr1H	PanBaRT20_trans_aveTPM10.gtf	exon	2151818	2153494	.	+	.	gene_id "RI:chr1H:2151818:2152151-2152230:2153494:+"; transcript_id "RI:chr1H:2151818:2152151-2152230:2153494:+:alternative1";
chr1H	PanBaRT20_trans_aveTPM10.gtf	exon	13801856	13802289	.	+	.	gene_id "RI:chr1H:13801856:13802289-13802362:13803321:+"; transcript_id "RI:chr1H:13801856:13802289-13802362:13803321:+:alternative2";
chr1H	PanBaRT20_trans_aveTPM10.gtf	exon	13802362	13803321	.	+	.	gene_id "RI:chr1H:13801856:13802289-13802362:13803321:+"; transcript_id "RI:chr1H:13801856:13802289-13802362:13803321:+:alternative2";
chr1H	PanBaRT20_trans_aveTPM10.gtf	exon	13801856	13803321	.	+	.	gene_id "RI:chr1H:13801856:13802289-13802362:13803321:+"; transcript_id "RI:chr1H:13801856:13802289-13802362:13803321:+:alternative1";
chr1H	PanBaRT20_trans_aveTPM10.gtf	exon	15188732	15189638	.	+	.	gene_id "RI:chr1H:15188732:15189638-15189732:15189943:+"; transcript_id "RI:chr1H:15188732:15189638-15189732:15189943:+:alternative2";
chr1H	PanBaRT20_trans_aveTPM10.gtf	exon	15189732	15189943	.	+	.	gene_id "RI:chr1H:15188732:15189638-15189732:15189943:+"; transcript_id "RI:chr1H:15188732:15189638-15189732:15189943:+:alternative2";
chr1H	PanBaRT20_trans_aveTPM10.gtf	exon	15188732	15189943	.	+	.	gene_id "RI:chr1H:15188732:15189638-15189732:15189943:+"; transcript_id "RI:chr1H:15188732:15189638-15189732:15189943:+:alternative1";
chr1H	PanBaRT20_trans_aveTPM10.gtf	exon	16707450	16707733	.	+	.	gene_id "RI:chr1H:16707450:16707733-16707824:16708318:+"; transcript_id "RI:chr1H:16707450:16707733-16707824:16708318:+:alternative2";
chr1H	PanBaRT20_trans_aveTPM10.gtf	exon	16707824	16708318	.	+	.	gene_id "RI:chr1H:16707450:16707733-16707824:16708318:+"; transcript_id "RI:chr1H:16707450:16707733-16707824:16708318:+:alternative2";
chr1H	PanBaRT20_trans_aveTPM10.gtf	exon	16707450	16708318	.	+	.	gene_id "RI:chr1H:16707450:16707733-16707824:16708318:+"; transcript_id "RI:chr1H:16707450:16707733-16707824:16708318:+:alternative1";
chr1H	PanBaRT20_trans_aveTPM10.gtf	exon	16870251	16870541	.	+	.	gene_id "RI:chr1H:16870251:16870541-16870673:16871208:+"; transcript_id "RI:chr1H:16870251:16870541-16870673:16871208:+:alternative2";
chr1H	PanBaRT20_trans_aveTPM10.gtf	exon	16870673	16871208	.	+	.	gene_id "RI:chr1H:16870251:16870541-16870673:16871208:+"; transcript_id "RI:chr1H:16870251:16870541-16870673:16871208:+:alternative2";
chr1H	PanBaRT20_trans_aveTPM10.gtf	exon	16870251	16871208	.	+	.	gene_id "RI:chr1H:16870251:16870541-16870673:16871208:+"; transcript_id "RI:chr1H:16870251:16870541-16870673:16871208:+:alternative1";
chr1H	PanBaRT20_trans_aveTPM10.gtf	exon	17599276	17599376	.	+	.	gene_id "RI:chr1H:17599276:17599376-17599542:17599624:+"; transcript_id "RI:chr1H:17599276:17599376-17599542:17599624:+:alternative2";
chr1H	PanBaRT20_trans_aveTPM10.gtf	exon	17599542	17599624	.	+	.	gene_id "RI:chr1H:17599276:17599376-17599542:17599624:+"; transcript_id "RI:chr1H:17599276:17599376-17599542:17599624:+:alternative2";
chr1H	PanBaRT20_trans_aveTPM10.gtf	exon	17599276	17599624	.	+	.	gene_id "RI:chr1H:17599276:17599376-17599542:17599624:+"; transcript_id "RI:chr1H:17599276:17599376-17599542:17599624:+:alternative1";
chr1H	PanBaRT20_trans_aveTPM10.gtf	exon	41279826	41279960	.	+	.	gene_id "RI:chr1H:41279826:41279960-41280598:41280919:+"; transcript_id "RI:chr1H:41279826:41279960-41280598:41280919:+:alternative2";
chr1H	PanBaRT20_trans_aveTPM10.gtf	exon	41280598	41280919	.	+	.	gene_id "RI:chr1H:41279826:41279960-41280598:41280919:+"; transcript_id "RI:chr1H:41279826:41279960-41280598:41280919:+:alternative2";
chr1H	PanBaRT20_trans_aveTPM10.gtf	exon	41279826	41280919	.	+	.	gene_id "RI:chr1H:41279826:41279960-41280598:41280919:+"; transcript_id "RI:chr1H:41279826:41279960-41280598:41280919:+:alternative1";
chr1H	PanBaRT20_trans_aveTPM10.gtf	exon	122089553	122089637	.	+	.	gene_id "RI:chr1H:122089553:122089637-122090699:122091200:+"; transcript_id "RI:chr1H:122089553:122089637-122090699:122091200:+:alternative2";
chr1H	PanBaRT20_trans_aveTPM10.gtf	exon	122090699	122091200	.	+	.	gene_id "RI:chr1H:122089553:122089637-122090699:122091200:+"; transcript_id "RI:chr1H:122089553:122089637-122090699:122091200:+:alternative2";
chr1H	PanBaRT20_trans_aveTPM10.gtf	exon	122089553	122091200	.	+	.	gene_id "RI:chr1H:122089553:122089637-122090699:122091200:+"; transcript_id "RI:chr1H:122089553:122089637-122090699:122091200:+:alternative1";
chr1H	PanBaRT20_trans_aveTPM10.gtf	exon	146712094	146712119	.	+	.	gene_id "RI:chr1H:146712094:146712119-146712967:146713056:+"; transcript_id "RI:chr1H:146712094:146712119-146712967:146713056:+:alternative2";
chr1H	PanBaRT20_trans_aveTPM10.gtf	exon	146712967	146713056	.	+	.	gene_id "RI:chr1H:146712094:146712119-146712967:146713056:+"; transcript_id "RI:chr1H:146712094:146712119-146712967:146713056:+:alternative2";
chr1H	PanBaRT20_trans_aveTPM10.gtf	exon	146712094	146713056	.	+	.	gene_id "RI:chr1H:146712094:146712119-146712967:146713056:+"; transcript_id "RI:chr1H:146712094:146712119-146712967:146713056:+:alternative1";
chr1H	PanBaRT20_trans_aveTPM10.gtf	exon	147473138	147473230	.	+	.	gene_id "RI:chr1H:147473138:147473230-147473771:147473968:+"; transcript_id "RI:chr1H:147473138:147473230-147473771:147473968:+:alternative2";
chr1H	PanBaRT20_trans_aveTPM10.gtf	exon	147473771	147473968	.	+	.	gene_id "RI:chr1H:147473138:147473230-147473771:147473968:+"; transcript_id "RI:chr1H:147473138:147473230-147473771:147473968:+:alternative2";
chr1H	PanBaRT20_trans_aveTPM10.gtf	exon	147473138	147473968	.	+	.	gene_id "RI:chr1H:147473138:147473230-147473771:147473968:+"; transcript_id "RI:chr1H:147473138:147473230-147473771:147473968:+:alternative1";
chr1H	PanBaRT20_trans_aveTPM10.gtf	exon	263185550	263185629	.	+	.	gene_id "RI:chr1H:263185550:263185629-263185952:263186066:+"; transcript_id "RI:chr1H:263185550:263185629-263185952:263186066:+:alternative2";
chr1H	PanBaRT20_trans_aveTPM10.gtf	exon	263185952	263186066	.	+	.	gene_id "RI:chr1H:263185550:263185629-263185952:263186066:+"; transcript_id "RI:chr1H:263185550:263185629-263185952:263186066:+:alternative2";
chr1H	PanBaRT20_trans_aveTPM10.gtf	exon	263185550	263186066	.	+	.	gene_id "RI:chr1H:263185550:263185629-263185952:263186066:+"; transcript_id "RI:chr1H:263185550:263185629-263185952:263186066:+:alternative1";
chr1H	PanBaRT20_trans_aveTPM10.gtf	exon	264581585	264581714	.	+	.	gene_id "RI:chr1H:264581585:264581714-264581863:264582008:+"; transcript_id "RI:chr1H:264581585:264581714-264581863:264582008:+:alternative2";
chr1H	PanBaRT20_trans_aveTPM10.gtf	exon	264581863	264582008	.	+	.	gene_id "RI:chr1H:264581585:264581714-264581863:264582008:+"; transcript_id "RI:chr1H:264581585:264581714-264581863:264582008:+:alternative2";
chr1H	PanBaRT20_trans_aveTPM10.gtf	exon	264581585	264582008	.	+	.	gene_id "RI:chr1H:264581585:264581714-264581863:264582008:+"; transcript_id "RI:chr1H:264581585:264581714-264581863:264582008:+:alternative1";
chr1H	PanBaRT20_trans_aveTPM10.gtf	exon	294094618	294094753	.	+	.	gene_id "RI:chr1H:294094618:294094753-294094834:294094945:+"; transcript_id "RI:chr1H:294094618:294094753-294094834:294094945:+:alternative2";
chr1H	PanBaRT20_trans_aveTPM10.gtf	exon	294094834	294094945	.	+	.	gene_id "RI:chr1H:294094618:294094753-294094834:294094945:+"; transcript_id "RI:chr1H:294094618:294094753-294094834:294094945:+:alternative2";
chr1H	PanBaRT20_trans_aveTPM10.gtf	exon	294094618	294094945	.	+	.	gene_id "RI:chr1H:294094618:294094753-294094834:294094945:+"; transcript_id "RI:chr1H:294094618:294094753-294094834:294094945:+:alternative1";
chr1H	PanBaRT20_trans_aveTPM10.gtf	exon	294093212	294093370	.	+	.	gene_id "RI:chr1H:294093212:294093370-294093472:294093647:+"; transcript_id "RI:chr1H:294093212:294093370-294093472:294093647:+:alternative2";
chr1H	PanBaRT20_trans_aveTPM10.gtf	exon	294093472	294093647	.	+	.	gene_id "RI:chr1H:294093212:294093370-294093472:294093647:+"; transcript_id "RI:chr1H:294093212:294093370-294093472:294093647:+:alternative2";
chr1H	PanBaRT20_trans_aveTPM10.gtf	exon	294093212	294093647	.	+	.	gene_id "RI:chr1H:294093212:294093370-294093472:294093647:+"; transcript_id "RI:chr1H:294093212:294093370-294093472:294093647:+:alternative1";
chr1H	PanBaRT20_trans_aveTPM10.gtf	exon	370522710	370522937	.	+	.	gene_id "RI:chr1H:370522710:370522937-370523798:370523917:+"; transcript_id "RI:chr1H:370522710:370522937-370523798:370523917:+:alternative2";
chr1H	PanBaRT20_trans_aveTPM10.gtf	exon	370523798	370523917	.	+	.	gene_id "RI:chr1H:370522710:370522937-370523798:370523917:+"; transcript_id "RI:chr1H:370522710:370522937-370523798:370523917:+:alternative2";
chr1H	PanBaRT20_trans_aveTPM10.gtf	exon	370522710	370523917	.	+	.	gene_id "RI:chr1H:370522710:370522937-370523798:370523917:+"; transcript_id "RI:chr1H:370522710:370522937-370523798:370523917:+:alternative1";
chr1H	PanBaRT20_trans_aveTPM10.gtf	exon	377309334	377309419	.	+	.	gene_id "RI:chr1H:377309334:377309419-377309491:377309902:+"; transcript_id "RI:chr1H:377309334:377309419-377309491:377309902:+:alternative2";
chr1H	PanBaRT20_trans_aveTPM10.gtf	exon	377309491	377309902	.	+	.	gene_id "RI:chr1H:377309334:377309419-377309491:377309902:+"; transcript_id "RI:chr1H:377309334:377309419-377309491:377309902:+:alternative2";
chr1H	PanBaRT20_trans_aveTPM10.gtf	exon	377309334	377309902	.	+	.	gene_id "RI:chr1H:377309334:377309419-377309491:377309902:+"; transcript_id "RI:chr1H:377309334:377309419-377309491:377309902:+:alternative1";
chr1H	PanBaRT20_trans_aveTPM10.gtf	exon	377309334	377309419	.	+	.	gene_id "RI:chr1H:377309334:377309419-377309720:377309902:+"; transcript_id "RI:chr1H:377309334:377309419-377309720:377309902:+:alternative2";
chr1H	PanBaRT20_trans_aveTPM10.gtf	exon	377309720	377309902	.	+	.	gene_id "RI:chr1H:377309334:377309419-377309720:377309902:+"; transcript_id "RI:chr1H:377309334:377309419-377309720:377309902:+:alternative2";
chr1H	PanBaRT20_trans_aveTPM10.gtf	exon	377309334	377309902	.	+	.	gene_id "RI:chr1H:377309334:377309419-377309720:377309902:+"; transcript_id "RI:chr1H:377309334:377309419-377309720:377309902:+:alternative1";
chr1H	PanBaRT20_trans_aveTPM10.gtf	exon	377308967	377309208	.	+	.	gene_id "RI:chr1H:377308967:377309208-377309334:377309902:+"; transcript_id "RI:chr1H:377308967:377309208-377309334:377309902:+:alternative2";
chr1H	PanBaRT20_trans_aveTPM10.gtf	exon	377309334	377309902	.	+	.	gene_id "RI:chr1H:377308967:377309208-377309334:377309902:+"; transcript_id "RI:chr1H:377308967:377309208-377309334:377309902:+:alternative2";
chr1H	PanBaRT20_trans_aveTPM10.gtf	exon	377308967	377309902	.	+	.	gene_id "RI:chr1H:377308967:377309208-377309334:377309902:+"; transcript_id "RI:chr1H:377308967:377309208-377309334:377309902:+:alternative1";
chr1H	PanBaRT20_trans_aveTPM10.gtf	exon	377307382	377308670	.	+	.	gene_id "RI:chr1H:377307382:377308670-377308967:377309208:+"; transcript_id "RI:chr1H:377307382:377308670-377308967:377309208:+:alternative2";
chr1H	PanBaRT20_trans_aveTPM10.gtf	exon	377308967	377309208	.	+	.	gene_id "RI:chr1H:377307382:377308670-377308967:377309208:+"; transcript_id "RI:chr1H:377307382:377308670-377308967:377309208:+:alternative2";
chr1H	PanBaRT20_trans_aveTPM10.gtf	exon	377307382	377309208	.	+	.	gene_id "RI:chr1H:377307382:377308670-377308967:377309208:+"; transcript_id "RI:chr1H:377307382:377308670-377308967:377309208:+:alternative1";
chr1H	PanBaRT20_trans_aveTPM10.gtf	exon	426919309	426919392	.	+	.	gene_id "RI:chr1H:426919309:426919392-426919491:426919565:+"; transcript_id "RI:chr1H:426919309:426919392-426919491:426919565:+:alternative2";
chr1H	PanBaRT20_trans_aveTPM10.gtf	exon	426919491	426919565	.	+	.	gene_id "RI:chr1H:426919309:426919392-426919491:426919565:+"; transcript_id "RI:chr1H:426919309:426919392-426919491:426919565:+:alternative2";
chr1H	PanBaRT20_trans_aveTPM10.gtf	exon	426919309	426919565	.	+	.	gene_id "RI:chr1H:426919309:426919392-426919491:426919565:+"; transcript_id "RI:chr1H:426919309:426919392-426919491:426919565:+:alternative1";
chr1H	PanBaRT20_trans_aveTPM10.gtf	exon	449356116	449356162	.	+	.	gene_id "RI:chr1H:449356116:449356162-449356279:449356569:+"; transcript_id "RI:chr1H:449356116:449356162-449356279:449356569:+:alternative2";
chr1H	PanBaRT20_trans_aveTPM10.gtf	exon	449356279	449356569	.	+	.	gene_id "RI:chr1H:449356116:449356162-449356279:449356569:+"; transcript_id "RI:chr1H:449356116:449356162-449356279:449356569:+:alternative2";
chr1H	PanBaRT20_trans_aveTPM10.gtf	exon	449356116	449356569	.	+	.	gene_id "RI:chr1H:449356116:449356162-449356279:449356569:+"; transcript_id "RI:chr1H:449356116:449356162-449356279:449356569:+:alternative1";
chr1H	PanBaRT20_trans_aveTPM10.gtf	exon	455998495	455998757	.	+	.	gene_id "RI:chr1H:455998495:455998757-455999546:455999816:+"; transcript_id "RI:chr1H:455998495:455998757-455999546:455999816:+:alternative2";
chr1H	PanBaRT20_trans_aveTPM10.gtf	exon	455999546	455999816	.	+	.	gene_id "RI:chr1H:455998495:455998757-455999546:455999816:+"; transcript_id "RI:chr1H:455998495:455998757-455999546:455999816:+:alternative2";
chr1H	PanBaRT20_trans_aveTPM10.gtf	exon	455998495	455999816	.	+	.	gene_id "RI:chr1H:455998495:455998757-455999546:455999816:+"; transcript_id "RI:chr1H:455998495:455998757-455999546:455999816:+:alternative1";
chr1H	PanBaRT20_trans_aveTPM10.gtf	exon	465329720	465329809	.	+	.	gene_id "RI:chr1H:465329720:465329809-465330320:465330524:+"; transcript_id "RI:chr1H:465329720:465329809-465330320:465330524:+:alternative2";
chr1H	PanBaRT20_trans_aveTPM10.gtf	exon	465330320	465330524	.	+	.	gene_id "RI:chr1H:465329720:465329809-465330320:465330524:+"; transcript_id "RI:chr1H:465329720:465329809-465330320:465330524:+:alternative2";
chr1H	PanBaRT20_trans_aveTPM10.gtf	exon	465329720	465330524	.	+	.	gene_id "RI:chr1H:465329720:465329809-465330320:465330524:+"; transcript_id "RI:chr1H:465329720:465329809-465330320:465330524:+:alternative1";
chr1H	PanBaRT20_trans_aveTPM10.gtf	exon	470694197	470694355	.	+	.	gene_id "RI:chr1H:470694197:470694355-470694416:470694791:+"; transcript_id "RI:chr1H:470694197:470694355-470694416:470694791:+:alternative2";
chr1H	PanBaRT20_trans_aveTPM10.gtf	exon	470694416	470694791	.	+	.	gene_id "RI:chr1H:470694197:470694355-470694416:470694791:+"; transcript_id "RI:chr1H:470694197:470694355-470694416:470694791:+:alternative2";
chr1H	PanBaRT20_trans_aveTPM10.gtf	exon	470694197	470694791	.	+	.	gene_id "RI:chr1H:470694197:470694355-470694416:470694791:+"; transcript_id "RI:chr1H:470694197:470694355-470694416:470694791:+:alternative1";
chr1H	PanBaRT20_trans_aveTPM10.gtf	exon	497454174	497454402	.	+	.	gene_id "RI:chr1H:497454174:497454402-497454633:497454720:+"; transcript_id "RI:chr1H:497454174:497454402-497454633:497454720:+:alternative2";
chr1H	PanBaRT20_trans_aveTPM10.gtf	exon	497454633	497454720	.	+	.	gene_id "RI:chr1H:497454174:497454402-497454633:497454720:+"; transcript_id "RI:chr1H:497454174:497454402-497454633:497454720:+:alternative2";
chr1H	PanBaRT20_trans_aveTPM10.gtf	exon	497454174	497454720	.	+	.	gene_id "RI:chr1H:497454174:497454402-497454633:497454720:+"; transcript_id "RI:chr1H:497454174:497454402-497454633:497454720:+:alternative1";
chr1H	PanBaRT20_trans_aveTPM10.gtf	exon	528986599	528986942	.	+	.	gene_id "RI:chr1H:528986599:528986942-528986982:528987059:+"; transcript_id "RI:chr1H:528986599:528986942-528986982:528987059:+:alternative2";
chr1H	PanBaRT20_trans_aveTPM10.gtf	exon	528986982	528987059	.	+	.	gene_id "RI:chr1H:528986599:528986942-528986982:528987059:+"; transcript_id "RI:chr1H:528986599:528986942-528986982:528987059:+:alternative2";
chr1H	PanBaRT20_trans_aveTPM10.gtf	exon	528986599	528987059	.	+	.	gene_id "RI:chr1H:528986599:528986942-528986982:528987059:+"; transcript_id "RI:chr1H:528986599:528986942-528986982:528987059:+:alternative1";
chr1H	PanBaRT20_trans_aveTPM10.gtf	exon	549330991	549331155	.	+	.	gene_id "RI:chr1H:549330991:549331155-549331676:549332164:+"; transcript_id "RI:chr1H:549330991:549331155-549331676:549332164:+:alternative2";
chr1H	PanBaRT20_trans_aveTPM10.gtf	exon	549331676	549332164	.	+	.	gene_id "RI:chr1H:549330991:549331155-549331676:549332164:+"; transcript_id "RI:chr1H:549330991:549331155-549331676:549332164:+:alternative2";
chr1H	PanBaRT20_trans_aveTPM10.gtf	exon	549330991	549332164	.	+	.	gene_id "RI:chr1H:549330991:549331155-549331676:549332164:+"; transcript_id "RI:chr1H:549330991:549331155-549331676:549332164:+:alternative1";
chr1H	PanBaRT20_trans_aveTPM10.gtf	exon	107709784	107709870	.	-	.	gene_id "RI:chr1H:107709784:107709870-107710037:107710416:-"; transcript_id "RI:chr1H:107709784:107709870-107710037:107710416:-:alternative2";
chr1H	PanBaRT20_trans_aveTPM10.gtf	exon	107710037	107710416	.	-	.	gene_id "RI:chr1H:107709784:107709870-107710037:107710416:-"; transcript_id "RI:chr1H:107709784:107709870-107710037:107710416:-:alternative2";
chr1H	PanBaRT20_trans_aveTPM10.gtf	exon	107709784	107710416	.	-	.	gene_id "RI:chr1H:107709784:107709870-107710037:107710416:-"; transcript_id "RI:chr1H:107709784:107709870-107710037:107710416:-:alternative1";
chr1H	PanBaRT20_trans_aveTPM10.gtf	exon	107710037	107710416	.	-	.	gene_id "RI:chr1H:107710037:107710416-107710519:107711062:-"; transcript_id "RI:chr1H:107710037:107710416-107710519:107711062:-:alternative2";
chr1H	PanBaRT20_trans_aveTPM10.gtf	exon	107710519	107711062	.	-	.	gene_id "RI:chr1H:107710037:107710416-107710519:107711062:-"; transcript_id "RI:chr1H:107710037:107710416-107710519:107711062:-:alternative2";
chr1H	PanBaRT20_trans_aveTPM10.gtf	exon	107710037	107711062	.	-	.	gene_id "RI:chr1H:107710037:107710416-107710519:107711062:-"; transcript_id "RI:chr1H:107710037:107710416-107710519:107711062:-:alternative1";
chr1H	PanBaRT20_trans_aveTPM10.gtf	exon	115734617	115734690	.	-	.	gene_id "RI:chr1H:115734617:115734690-115734794:115734917:-"; transcript_id "RI:chr1H:115734617:115734690-115734794:115734917:-:alternative2";
chr1H	PanBaRT20_trans_aveTPM10.gtf	exon	115734794	115734917	.	-	.	gene_id "RI:chr1H:115734617:115734690-115734794:115734917:-"; transcript_id "RI:chr1H:115734617:115734690-115734794:115734917:-:alternative2";
chr1H	PanBaRT20_trans_aveTPM10.gtf	exon	115734617	115734917	.	-	.	gene_id "RI:chr1H:115734617:115734690-115734794:115734917:-"; transcript_id "RI:chr1H:115734617:115734690-115734794:115734917:-:alternative1";
chr1H	PanBaRT20_trans_aveTPM10.gtf	exon	200359517	200359879	.	-	.	gene_id "RI:chr1H:200359517:200359879-200359959:200360126:-"; transcript_id "RI:chr1H:200359517:200359879-200359959:200360126:-:alternative2";
chr1H	PanBaRT20_trans_aveTPM10.gtf	exon	200359959	200360126	.	-	.	gene_id "RI:chr1H:200359517:200359879-200359959:200360126:-"; transcript_id "RI:chr1H:200359517:200359879-200359959:200360126:-:alternative2";
chr1H	PanBaRT20_trans_aveTPM10.gtf	exon	200359517	200360126	.	-	.	gene_id "RI:chr1H:200359517:200359879-200359959:200360126:-"; transcript_id "RI:chr1H:200359517:200359879-200359959:200360126:-:alternative1";
[truncated: 851 more rows]
