# Supplementary material for: A barley pan-transcriptome reveals layers of genotype-dependent transcriptional complexity
Source: Research Square preprint supplement (doi:10.21203/rs.3.rs-3787876/v1), 2024-01-08
Supplement: Supplementary file 7 [file 99e53e4471eff393d33cc9a9.xlsx]

## Sheet: Sheet1
Supplementary Data 7 genotypes with the 141Mb 7H inversion and non-inversion
Cultivar	7H Inversion
Aapo	non-inversion
Abacus	non-inversion
Abava	non-inversion
Acoustic	non-inversion
Alabama	non-inversion
Alexis	non-inversion
Alliot	non-inversion
Aluminium	inversion
Alva	non-inversion
Anais	non-inversion
Annabell	inversion
Apex	non-inversion
Appaloosa	non-inversion
Armelle	non-inversion
Arvo	non-inversion
Athos	non-inversion
Atlas	inversion
Avalon	non-inversion
Avec	non-inversion
Balder	non-inversion
Balga	non-inversion
Barke	non-inversion
Baronesse	non-inversion
Beatrix	non-inversion
Beka	non-inversion
Berac	non-inversion
Berenice	non-inversion
Berwick	non-inversion
Betzes	non-inversion
Binder	non-inversion
Binder Abed	non-inversion
Birgitta	non-inversion
Blenheim	non-inversion
Bogart	inversion
Bonus	non-inversion
Braemar	non-inversion
Britta	non-inversion
Camargue	non-inversion
Campala	non-inversion
Carlsberg	non-inversion
Cellar	non-inversion
Centurion	non-inversion
Century	inversion
Chad	non-inversion
Chalice	non-inversion
Chariot	non-inversion
Chaser	non-inversion
Chevalier Tystofte 2	non-inversion
Chieftain	non-inversion
Chime	non-inversion
Cilla	non-inversion
Claret	non-inversion
Class	non-inversion
Cocktail	non-inversion
Colada	non-inversion
Concerto	non-inversion
Cooper	non-inversion
Cork	non-inversion
Corniche	inversion
Crusader	inversion
Dandy	non-inversion
Deba Abed	non-inversion
Decanter	non-inversion
Delibes	non-inversion
Delta	non-inversion
Derkado	non-inversion
Diamant	inversion
Digger	non-inversion
Dina	non-inversion
Domen	non-inversion
Doyen	inversion
Drake	non-inversion
Drost	non-inversion
Drum	inversion
Egmont	non-inversion
Emir	non-inversion
Fairytale	non-inversion
Favorit	non-inversion
Forensic	non-inversion
Freja	non-inversion
Georgie	non-inversion
Gitane	non-inversion
Golden Promise	non-inversion
Golf	non-inversion
Gull	non-inversion
Gundel	non-inversion
Hart	non-inversion
Hellas	non-inversion
Helmi	non-inversion
Hemingway	inversion
Heron	non-inversion
Husky AFP2429	inversion
Imidis	non-inversion
Impala	non-inversion
Infinium	inversion
Ingrid	non-inversion
Invictus	inversion
Isabella	inversion
Isaria	non-inversion
Kassima	non-inversion
Klaxon	non-inversion
Koral	non-inversion
Krystal	non-inversion
KWS Orphelia	non-inversion
KWS Vitara	inversion
Kym	non-inversion
Landlord	non-inversion
Lenta	non-inversion
Livet	non-inversion
Lud	non-inversion
Macaw	non-inversion
Maja	non-inversion
Maresi	non-inversion
Maris Mink	non-inversion
Maypole	non-inversion
Meltan	non-inversion
Midas	non-inversion
Momentum	non-inversion
Mona	non-inversion
Natasha	non-inversion
Natasia	non-inversion
Nomad	non-inversion
Nordal	non-inversion
Novello	inversion
Odyssey	inversion
Okos	non-inversion
Olympus	inversion
Optic	non-inversion
Orbit	non-inversion
Otto	non-inversion
Overture	non-inversion
Pallas	non-inversion
Pewter	non-inversion
Pitcher	non-inversion
Poker	non-inversion
Potter	non-inversion
Prague	non-inversion
Prestige	non-inversion
Prisma	non-inversion
Prodigal	non-inversion
Propino	inversion
Publican	inversion
Quench	inversion
Rainbow	non-inversion
Rapid	non-inversion
Reggae	non-inversion
Renaissance	non-inversion
Renata	inversion
RGT Conquest	inversion
RGT Planet	inversion
Rhynchostar	non-inversion
Ria	inversion
Riviera	non-inversion
Romi	non-inversion
Rummy	non-inversion
Salka	non-inversion
Saloon	non-inversion
Salve	non-inversion
Scandium	non-inversion
Scarlett	non-inversion
Sebastian	non-inversion
Senat	non-inversion
Simba	non-inversion
Simon	non-inversion
Skittle	non-inversion
Spartan	non-inversion
Spey	inversion
Spire	non-inversion
Starlight	non-inversion
Static	non-inversion
Steffi	non-inversion
Steina	non-inversion
Stendes	non-inversion
Sultan	non-inversion
Summit	inversion
SW Scania	non-inversion
SY Taberna	inversion
SY Universal	inversion
Tankard	non-inversion
Taphouse	non-inversion
Tartan	non-inversion
Tavern	non-inversion
Tennis	non-inversion
Tocada	non-inversion
Tremois	non-inversion
Trinity	non-inversion
Triumph	non-inversion
Troubadour	non-inversion
Tweed	non-inversion
Tyne	non-inversion
Union	non-inversion
Vada	non-inversion
Valticky	non-inversion
Vankkuri	non-inversion
Villa	non-inversion
Volla	non-inversion
Waggon	non-inversion
Westminster	inversion
Wing	non-inversion
Wisa	non-inversion
Zephyr 2RSB	non-inversion
