# Supplementary material for: A barley pan-transcriptome reveals layers of genotype-dependent transcriptional complexity
Source: Research Square preprint supplement (doi:10.21203/rs.3.rs-3787876/v1), 2024-01-08
Supplement: Supplementary file 8 [file a236280ee10e6ed9fe398c09.xlsx]

## Sheet: Sheet1
Supplementary Data 3: Gene categories of GsRTD
core;single:
core;multiple:
shell;single:
shell;multiple:
cloud;single:
cloud;multiple:
Unmmaped: The unmapped GsRTD genes to the PGSVP pan-genome
Genotype	core;single	core;multiple	shell;single	shell;multiple	cloud;single	cloud;multiple	Unmapped
Akashinriki	13,680 (36.08%)	4,660 (12.29%)	10,488 (27.66%)	3,354 (8.85%)	1,171 (3.09%)	14 (0.04%)	4,547 (11.99%)
B1K-04-12	13,680 (35.45%)	4,964 (12.86%)	9,365 (24.27%)	3,491 (9.05%)	2,075 (5.38%)	31 (0.08%)	4,980 (12.91%)
Barke	13,680 (34.93%)	4,812 (12.29%)	11,520 (29.41%)	3,612 (9.22%)	1,754 (4.48%)	12 (0.03%)	3,778 (9.65%)
GoldenPromise	13,680 (33.71%)	5,687 (14.02%)	11,741 (28.94%)	3,955 (9.75%)	1,801 (4.44%)	60 (0.15%)	3,653 (9%)
Hockett	13,680 (35.38%)	4,734 (12.24%)	11,909 (30.8%)	3,936 (10.18%)	1,194 (3.09%)	20 (0.05%)	3,194 (8.26%)
HOR10350	13,680 (36.58%)	4,618 (12.35%)	10,619 (28.4%)	3,242 (8.67%)	1,191 (3.19%)	10 (0.03%)	4,033 (10.79%)
HOR13821	13,680 (37.5%)	4,561 (12.5%)	10,268 (28.15%)	3,266 (8.95%)	1,115 (3.06%)	12 (0.03%)	3,578 (9.81%)
HOR13942	13,680 (34.53%)	4,948 (12.49%)	11,454 (28.91%)	3,863 (9.75%)	1,651 (4.17%)	10 (0.03%)	4,013 (10.13%)
HOR21599	13,680 (35.98%)	4,620 (12.15%)	10,376 (27.29%)	3,360 (8.84%)	1,655 (4.35%)	29 (0.08%)	4,306 (11.32%)
HOR3081	13,680 (35.87%)	4,499 (11.8%)	11,578 (30.36%)	3,367 (8.83%)	1,441 (3.78%)	24 (0.06%)	3,545 (9.3%)
HOR3365	13,680 (35.8%)	4,671 (12.22%)	10,855 (28.41%)	3,470 (9.08%)	1,407 (3.68%)	26 (0.07%)	4,102 (10.74%)
HOR7552	13,680 (36.01%)	4,859 (12.79%)	10,550 (27.77%)	3,421 (9.01%)	1,320 (3.47%)	22 (0.06%)	4,136 (10.89%)
HOR8148	13,680 (34.92%)	5,594 (14.28%)	10,827 (27.64%)	4,158 (10.61%)	1,489 (3.8%)	56 (0.14%)	3,373 (8.61%)
HOR9043	13,680 (33.51%)	4,840 (11.86%)	12,074 (29.57%)	3,720 (9.11%)	2,090 (5.12%)	33 (0.08%)	4,389 (10.75%)
Igri	13,680 (34.22%)	4,632 (11.59%)	12,438 (31.12%)	3,796 (9.5%)	1,659 (4.15%)	21 (0.05%)	3,748 (9.38%)
Morex	13,680 (35.7%)	4,889 (12.76%)	13,622 (35.55%)	4,162 (10.86%)	1,849 (4.82%)	88 (0.23%)	32 (0.08%)
OUN333	13,680 (36.9%)	4,606 (12.43%)	10,498 (28.32%)	3,207 (8.65%)	1,258 (3.39%)	18 (0.05%)	3,802 (10.26%)
RGTPlanet	13,680 (34.92%)	4,707 (12.01%)	11,938 (30.47%)	3,783 (9.66%)	1,358 (3.47%)	23 (0.06%)	3,688 (9.41%)
ZDM01467	13,680 (38.55%)	4,448 (12.54%)	9,262 (26.1%)	2,970 (8.37%)	1,041 (2.93%)	31 (0.09%)	4,051 (11.42%)
ZDM02064	13,680 (37.56%)	4,609 (12.65%)	9,499 (26.08%)	3,219 (8.84%)	1,200 (3.29%)	29 (0.08%)	4,188 (11.5%)
Average	13,680.00 (35.705%)	4,797.90 (12.506%)	11,044.05 (28.761%)	3,567.60 (9.289%)	1,485.95 (3.8575%)	28.45 (0.0745%)	3,756.80 (9.81%)
