# Supplementary material for: A barley pan-transcriptome reveals layers of genotype-dependent transcriptional complexity
Source: Research Square preprint supplement (doi:10.21203/rs.3.rs-3787876/v1), 2024-01-08
Supplement: Supplementary file 9 [file a3e69de654424ae045ef1554.xlsx]

## Sheet: Sheet1
Supplementary Data 2 Ordering of genotypes incorporated into the linear pan-genome
1	Morex
2	B1K-04-12
3	GoldenPromise
4	HOR8148
5	RGTPlanet
6	HOR21599
7	HOR13821
8	OUN333
9	HOR3365
10	HOR9043
11	HOR10350
12	HOR13942
13	Akashinriki
14	HOR7552
15	ZDM01467
16	HOR3081
17	Barke
18	Igri
19	Hockett
20	ZDM02064
