# Supplementary material for: A barley pan-transcriptome reveals layers of genotype-dependent transcriptional complexity
Source: Research Square preprint supplement (doi:10.21203/rs.3.rs-3787876/v1), 2024-01-08
Supplement: Supplementary file 10 [file a632c7a8d79660e100984326.xlsx]

## Sheet: Sheet1
Supplementary Data 10 Barley cv. Morex Expression Atlas Metadata
	Developmental tissue
	Control for treatment
	Treatment
Treatment samples
study_accession	Study Keyword	run_accession	sample_accession	tax_id	sample_description	sample_title	cultivar	tissue_type	dev_stage	bio_replicate	expt_conditions	paper title	reference
PRJEB29972	4°C cold treatment	ERR2930823	SAMEA5131712	112509	1 week old plants control first leaf	Morex_P_1	Morex	seedling leaf	1 week	1	control	The contribution of cis- and trans-acting variants to gene regulation in wild and domesticated barley under cold stress and control conditions	https://doi.org/10.1093/jxb/eraa036
PRJEB29972	4°C cold treatment	ERR2930872	SAMEA5131713	112509	1 week old plants control first leaf	Morex_P_2	Morex	seedling leaf	1 week	2	control
PRJEB29972	4°C cold treatment	ERR2930805	SAMEA5131714	112509	1 week old plants control first leaf	Morex_P_3	Morex	seedling leaf	1 week	3	control
PRJEB29972	4°C cold treatment	ERR2930787	SAMEA5131715	112509	1 week old plants control first leaf no DNAse	Morex121_noDNase	Morex	seedling leaf	1 week	1	control
PRJEB29972	4°C cold treatment	ERR2930818	SAMEA5131716	112509	1 week old plants control first leaf no DNAse	Morex38_noDNase	Morex	seedling leaf	1 week	1	control
PRJEB29972	4°C cold treatment	ERR2930870	SAMEA5131717	112509	1 week old plants control first leaf no DNAse	Morex68_noDNase	Morex	seedling leaf	1 week	1	control
PRJEB29972	4°C cold treatment	ERR2930795	SAMEA5131658	112509	1 week old plants - 4oC cold treated for 3 hrs	Cold_Morex_P_1	Morex	seedling leaf	1 week	1	cold treated
PRJEB29972	4°C cold treatment	ERR2930844	SAMEA5131659	112509	1 week old plants - 4oC cold treated for 3 hrs	Cold_Morex_P_2	Morex	seedling leaf	1 week	2	cold treated
PRJEB29972	4°C cold treatment	ERR2930757	SAMEA5131660	112509	1 week old plants - 4oC cold treated for 3 hrs	Cold_Morex_P_3	Morex	seedling leaf	1 week	3	cold treated
PRJEB29972	4°C cold treatment	ERR2930857	SAMEA5131661	112509	1 week old plants - 4oC cold treated for 3 hrs	Cold_Morex_P_4	Morex	seedling leaf	1 week	4	cold treated
PRJEB52944	brushing	ERR9744298	SAMEA14416142	4513	2 week old, second leaf 0min control	HvT1R1	Morex	seedling leaf	3 week	1	control
PRJEB52944	brushing	ERR9744299	SAMEA14416143	4513	2 week old, second leaf 0min control	HvT1R2	Morex	seedling leaf	3 week	2	control
PRJEB52944	brushing	ERR9744300	SAMEA14416144	4513	2 week old, second leaf 0min control	HvT1R3	Morex	seedling leaf	3 week	3	control
PRJEB52944	brushing	ERR9744301	SAMEA14416145	4513	2 week old, second leaf 25min after brushing	HvT2R1	Morex	seedling leaf	3 week	1	25 min after brushing	The dynamics of touch-responsive gene expression in cereals	https://doi.org/10.1111/tpj.16269
PRJEB52944	brushing	ERR9744302	SAMEA14416146	4513	2 week old, second leaf 25min after brushing	HvT2R2	Morex	seedling leaf	3 week	2	25 min after brushing
PRJEB52944	brushing	ERR9744303	SAMEA14416147	4513	2 week old, second leaf 25min after brushing	HvT2R3	Morex	seedling leaf	3 week	3	25 min after brushing
PRJEB52944	brushing	ERR9744304	SAMEA14416148	4513	2 week old, second leaf 1hr after brushing	HvT3R1	Morex	seedling leaf	3 week	1	1 hr after brushing
PRJEB52944	brushing	ERR9744305	SAMEA14416149	4513	2 week old, second leaf 1hr after brushing	HvT3R2	Morex	seedling leaf	3 week	2	1 hr after brushing
PRJEB52944	brushing	ERR9744306	SAMEA14416150	4513	2 week old, second leaf 1hr after brushing	HvT3R3	Morex	seedling leaf	3 week	3	1 hr after brushing
PRJEB52944	brushing	ERR9744307	SAMEA14416151	4513	2 week old, second leaf 2hr after brushing	HvT4R1	Morex	seedling leaf	3 week	1	2hr after brushing
PRJEB52944	brushing	ERR9744308	SAMEA14416152	4513	2 week old, second leaf 2hr after brushing	HvT4R2	Morex	seedling leaf	3 week	2	2hr after brushing
PRJEB52944	brushing	ERR9744309	SAMEA14416153	4513	2 week old, second leaf 2hr after brushing	HvT4R3	Morex	seedling leaf	3 week	3	2hr after brushing
PRJNA315041	Disease, Cochliobolus	SRR3290257; SRR3290258	SAMN04549453	112509	2 week old plants mock 12hrs post innoculation	R1_MOCK_WT_12.1_files; R1_MOCK_WT_12.2_files	Morex	seedling leaf	2 weeks	1	Mock Control 12h	RNA-seq reveals few differences in resistant and susceptible responses of barley to infection by the spot blotch pathogen Bipolaris sorokiniana	https://doi.org/10.1101/384529
PRJNA315041	Disease, Cochliobolus	SRR3290283; SRR3290284	SAMN04549453	112509	2 week old plants mock 12hrs post innoculation	R2_MOCK_WT_12.1_files; R2_MOCK_WT_12.2_files	Morex	seedling leaf	2 weeks	2	Mock Control 12h
PRJNA315041	Disease, Cochliobolus	SRR3290313; SRR3290314; SRR3290315	SAMN04549453	112509	2 week old plants mock 12hrs post innoculation	R3_MOCK_WT_12.1_files; R3_MOCK_WT_12.2_files; R3_MOCK_WT_12.3_files	Morex	seedling leaf	2 weeks	3	Mock Control 12h
PRJNA315041	Disease, Cochliobolus	SRR3290259; SRR3290260	SAMN04549454	112509	2 week old plants mock 24hrs post innoculation	R1_MOCK_WT_24.1_files; R1_MOCK_WT_24.2_files	Morex	seedling leaf	2 weeks	1	Mock Control 24h
PRJNA315041	Disease, Cochliobolus	SRR3290285; SRR3290286	SAMN04549454	112509	2 week old plants mock 24hrs post innoculation	R2_MOCK_WT_24.1_files; R2_MOCK_WT_24.2_files	Morex	seedling leaf	2 weeks	2	Mock Control 24h
PRJNA315041	Disease, Cochliobolus	SRR3290316; SRR3290317; SRR3290318	SAMN04549454	112509	2 week old plants mock 24hrs post innoculation	R3_MOCK_WT_24.1_files; R3_MOCK_WT_24.2_files; R3_MOCK_WT_24.3_files	Morex	seedling leaf	2 weeks	3	Mock Control 24h
PRJNA315041	Disease, Cochliobolus	SRR3290261; SRR3290262	SAMN04549455	112509	2 week old plants mock 36hrs post innoculation	R1_MOCK_WT_36.1_files R1_MOCK_WT_36.2_files	Morex	seedling leaf	2 weeks	1	Mock Control 36h
PRJNA315041	Disease, Cochliobolus	SRR3290287; SRR3290288; SRR3290289	SAMN04549455	112509	2 week old plants mock 36hrs post innoculation	R2_MOCK_WT_36.1_files; R2_MOCK_WT_36.2_files; R2_MOCK_WT_36.3_files	Morex	seedling leaf	2 weeks	2	Mock Control 36h
PRJNA315041	Disease, Cochliobolus	SRR3290319; SRR3290320; SRR3290321	SAMN04549455	112509	2 week old plants mock 36hrs post innoculation	R3_MOCK_WT_36.1_files; R3_MOCK_WT_36.2_files; R3_MOCK_WT_36.3_files	Morex	seedling leaf	2 weeks	3	Mock Control 36h
PRJNA315041	Disease, Cochliobolus	SRR3290245; SRR3290246	SAMN04549447	112509	2 week old plants innoculated 12hrs post innoculation	R1_INOC_WT_12.1_files; R1_INOC_WT_12.2_files	Morex	seedling leaf	2 weeks	1	C. sativus 12hpi
PRJNA315041	Disease, Cochliobolus	SRR3290269; SRR3290270	SAMN04549447	112509	2 week old plants innoculated 12hrs post innoculation	R2_INOC_WT_12.1_files; R2_INOC_WT_12.2_files	Morex	seedling leaf	2 weeks	2	C. sativus 12hpi
PRJNA315041	Disease, Cochliobolus	SRR3290297; SRR3290298; SRR3290299	SAMN04549447	112509	2 week old plants innoculated 12hrs post innoculation	R3_INOC_WT_12.1_files; R3_INOC_WT_12.2_files; R3_INOC_WT_12.3_files	Morex	seedling leaf	2 weeks	3	C. sativus 12hpi
PRJNA315041	Disease, Cochliobolus	SRR3290247; SRR3290248	SAMN04549448	112509	2 week old plants innoculated 24 hrs post innoculation	R1_INOC_WT_24.1_files; R1_INOC_WT_24.2_files	Morex	seedling leaf	2 weeks	1	C. sativus 24hpi
PRJNA315041	Disease, Cochliobolus	SRR3290271; SRR3290272	SAMN04549448	112509	2 week old plants innoculated 24 hrs post innoculation	R2_INOC_WT_24.1_files; R2_INOC_WT_24.2_files	Morex	seedling leaf	2 weeks	2	C. sativus 24hpi
PRJNA315041	Disease, Cochliobolus	SRR3290300; SRR3290301; SRR3290302	SAMN04549448	112509	2 week old plants innoculated 24 hrs post innoculation	R3_INOC_WT_24.1_files; R3_INOC_WT_24.2_files; R3_INOC_WT_24.3_files	Morex	seedling leaf	2 weeks	3	C. sativus 24hpi
PRJNA315041	Disease, Cochliobolus	SRR3290249; SRR3290250	SAMN04549449	112509	2 week old plants innoculated 36 hrs post innoculation	R1_INOC_WT_36.1_files; R1_INOC_WT_36.2_files	Morex	seedling leaf	2 weeks	1	C. sativus 36hpi
PRJNA315041	Disease, Cochliobolus	SRR3290273; SRR3290274; SRR3290275	SAMN04549449	112509	2 week old plants innoculated 36 hrs post innoculation	R2_INOC_WT_36.1_files; R2_INOC_WT_36.2_files; R2_INOC_WT_36.3_files	Morex	seedling leaf	2 weeks	2	C. sativus 36hpi
PRJNA315041	Disease, Cochliobolus	SRR3290303; SRR3290304; SRR3290305	SAMN04549449	112509	2 week old plants innoculated 36 hrs post innoculation	R3_INOC_WT_36.1_files; R3_INOC_WT_36.2_files; R3_INOC_WT_36.3_files	Morex	seedling leaf	2 weeks	3	C. sativus 36hpi
PRJNA326683	Spider mite	SRR3714108	SAMN05290739	4513	5th leaf tissue, 30 day old plants, control uninfested, 2hrs	Leaf non-infested rep1	Morex	5th leaf, uninfested	30 days old	1	non-infested	Generalist and Specialist Mite Herbivores Induce Similar Defense Responses in Maize and Barley but Differ in Susceptibility to Benzoxazinoids	https://doi.org/10.3389/fpls.2018.01222
PRJNA326683	Spider mite	SRR3714109	SAMN05290740	4513	5th leaf tissue, 30 day old plants, control uninfested, 2hrs	Leaf non-infested rep2	Morex	5th leaf, uninfested	30 days	2	non-infested
PRJNA326683	Spider mite	SRR3714110	SAMN05290741	4513	5th leaf tissue, 30 day old plants, control uninfested, 2hrs	Leaf non-infested rep3	Morex	5th leaf, uninfested	30 days	3	non-infested
PRJNA326683	Spider mite	SRR3714111	SAMN05290742	4513	5th leaf tissue, 30 day old plants, control uninfested, 2hrs	Leaf non-infested rep4	Morex	5th leaf, uninfested	30 days	4	non-infested
PRJNA326683	Spider mite	SRR3714128	SAMN05290759	4513	5th leaf tissue, 30 day old plants, O. pratensis infested 2hrs	Leaf BGM-infested 2hr rep1	Morex	5th leaf, mite infested	30 days	1	infested Banks grass mite 2hr
PRJNA326683	Spider mite	SRR3714129	SAMN05290760	4513	5th leaf tissue, 30 day old plants, O. pratensis infested 2hrs	Leaf BGM-infested 2hr rep2	Morex	5th leaf, mite infested	30 days	2	infested Banks grass mite 2hr
PRJNA326683	Spider mite	SRR3714130	SAMN05290761	4513	5th leaf tissue, 30 day old plants, O. pratensis infested 2hrs	Leaf BGM-infested 2hr rep3	Morex	5th leaf, mite infested	30 days	3	infested Banks grass mite 2hr
PRJNA326683	Spider mite	SRR3714131	SAMN05290762	4513	5th leaf tissue, 30 day old plants, O. pratensis infested 2hrs	Leaf BGM-infested 2hr rep4	Morex	5th leaf, mite infested	30 days	4	infested Banks grass mite 2hr
PRJNA326683	Spider mite	SRR3714132	SAMN05290763	4513	5th leaf tissue, 30 day old plants, O. pratensis infested 24hrs	Leaf BGM-infested 24hr rep1	Morex	5th leaf, mite infested	30 days	1	infested Banks grass mite 24hr
PRJNA326683	Spider mite	SRR3714133	SAMN05290764	4513	5th leaf tissue, 30 day old plants, O. pratensis infested 24hrs	Leaf BGM-infested 24hr rep2	Morex	5th leaf, mite infested	30 days	2	infested Banks grass mite 24hr
PRJNA326683	Spider mite	SRR3714134	SAMN05290765	4513	5th leaf tissue, 30 day old plants, O. pratensis infested 24hrs	Leaf BGM-infested 24hr rep3	Morex	5th leaf, mite infested	30 days	3	infested Banks grass mite 24hr
PRJNA326683	Spider mite	SRR3714135	SAMN05290766	4513	5th leaf tissue, 30 day old plants, O. pratensis infested 24hrs	Leaf BGM-infested 24hr rep4	Morex	5th leaf, mite infested	30 days	4	infested Banks grass mite 24hr
PRJNA326683	Spider mite	SRR3714120	SAMN05290751	4513	5th leaf tissue, 30 day old plants, T. urticae infested, 2hrs	Leaf TSSM-infested 2hr rep1	Morex	5th leaf, mite infested	30 days	1	infested two-spotted spider mite 2hr
PRJNA326683	Spider mite	SRR3714121	SAMN05290752	4513	5th leaf tissue, 30 day old plants, T. urticae infested, 2hrs	Leaf TSSM-infested 2hr rep2	Morex	5th leaf, mite infested	30 days	2	infested two-spotted spider mite 2hr
PRJNA326683	Spider mite	SRR3714122	SAMN05290753	4513	5th leaf tissue, 30 day old plants, T. urticae infested, 2hrs	Leaf TSSM-infested 2hr rep3	Morex	5th leaf, mite infested	30 days	3	infested two-spotted spider mite 2hr
PRJNA326683	Spider mite	SRR3714123	SAMN05290754	4513	5th leaf tissue, 30 day old plants, T. urticae infested, 2hrs	Leaf TSSM-infested 2hr rep4	Morex	5th leaf, mite infested	30 days	4	infested two-spotted spider mite 2hr
PRJNA326683	Spider mite	SRR3714124	SAMN05290755	4513	5th leaf tissue, 30 day old plants, T. urticae infested, 24hrs	Leaf TSSM-infested 24hr rep1	Morex	5th leaf, mite infested	30 days	1	infested two-spotted spider mite 24 hr
PRJNA326683	Spider mite	SRR3714125	SAMN05290756	4513	5th leaf tissue, 30 day old plants, T. urticae infested, 24hrs	Leaf TSSM-infested 24hr rep2	Morex	5th leaf, mite infested	30 days	2	infested two-spotted spider mite 24 hr
PRJNA326683	Spider mite	SRR3714126	SAMN05290757	4513	5th leaf tissue, 30 day old plants, T. urticae infested, 24hrs	Leaf TSSM-infested 24hr rep3	Morex	5th leaf, mite infested	30 days	3	infested two-spotted spider mite 24 hr
PRJNA326683	Spider mite	SRR3714127	SAMN05290758	4513	5th leaf tissue, 30 day old plants, T. urticae infested, 24hrs	Leaf TSSM-infested 24hr rep4	Morex	5th leaf, mite infested	30 days	4	infested two-spotted spider mite 24 hr
PRJNA326683	Spider mite	SRR3714112	SAMN05290743	4513	5th leaf tissue, 30 day old plants, wounded (sandpaper) 2hrs	Leaf wounded 2hr rep1	Morex	5th leaf, wounded	30 days	1	wounded 2hr
PRJNA326683	Spider mite	SRR3714113	SAMN05290744	4513	5th leaf tissue, 30 day old plants, wounded (sandpaper) 2hrs	Leaf wounded 2hr rep2	Morex	5th leaf, wounded	30 days	2	wounded 2hr
PRJNA326683	Spider mite	SRR3714114	SAMN05290745	4513	5th leaf tissue, 30 day old plants, wounded (sandpaper) 2hrs	Leaf wounded 2hr rep3	Morex	5th leaf, wounded	30 days	3	wounded 2hr
PRJNA326683	Spider mite	SRR3714115	SAMN05290746	4513	5th leaf tissue, 30 day old plants, wounded (sandpaper) 2hrs	Leaf wounded 2hr rep4	Morex	5th leaf, wounded	30 days	4	wounded 2hr
PRJNA326683	Spider mite	SRR3714116	SAMN05290747	4513	5th leaf tissue, 30 day old plants, wounded (sandpaper) 24hrs	Leaf wounded 24hr rep1	Morex	5th leaf, wounded	30 days	1	wounded 24 hr
PRJNA326683	Spider mite	SRR3714117	SAMN05290748	4513	5th leaf tissue, 30 day old plants, wounded (sandpaper) 24hrs	Leaf wounded 24hr rep2	Morex	5th leaf, wounded	30 days	2	wounded 24 hr
PRJNA326683	Spider mite	SRR3714118	SAMN05290749	4513	5th leaf tissue, 30 day old plants, wounded (sandpaper) 24hrs	Leaf wounded 24hr rep3	Morex	5th leaf, wounded	30 days	3	wounded 24 hr
PRJNA326683	Spider mite	SRR3714119	SAMN05290750	4513	5th leaf tissue, 30 day old plants, wounded (sandpaper) 24hrs	Leaf wounded 24hr rep4	Morex	5th leaf, wounded	30 days	4	wounded 24 hr
PRJNA382490	Heavy metal, cadmium	SRR5452107	SAMN06718709	4513	7 day old roots, Cadmium control	cadmium treatment control sample root 01	Morex	roots	7 days	1	cadmium treatment control	Transcriptome of barley under three different heavy metal stress reaction	https://doi.org/10.1016/j.gdata.2017.05.016
PRJNA382490	Heavy metal, cadmium	SRR5452105	SAMN06718711	4513	7 day old roots, Cadmium control	cadmium treatment control sample root 02	Morex	roots	7 days	2	cadmium treatment control
PRJNA382490	Heavy metal, cadmium	SRR5452103	SAMN06718713	4513	7 day old roots, Cadmium control	cadmium treatment control sample root 03	Morex	roots	7 days	3	cadmium treatment control
PRJNA382490	Heavy metal, cadmium	SRR5452101	SAMN06718715	4513	7 day old roots Cadmium treatment	cadmium treatment treated sample root 01	Morex	roots	7 days	1	cadmium treatment treated
PRJNA382490	Heavy metal, cadmium	SRR5452099	SAMN06718717	4513	7 day old roots Cadmium treatment	cadmium treatment treated sample root 02	Morex	roots	7 days	2	cadmium treatment treated
PRJNA382490	Heavy metal, cadmium	SRR5452097	SAMN06718719	4513	7 day old roots Cadmium treatment	cadmium treatment treated sample root 03	Morex	roots	7 days	3	cadmium treatment treated
PRJNA382490	Heavy metal, copper	SRR5452131	SAMN06718685	4513	7 day old roots, Copper control	copper treatment control sample root 01	Morex	roots	7 days	1	copper treatment control
PRJNA382490	Heavy metal, copper	SRR5452129	SAMN06718687	4513	7 day old roots, Copper control	copper treatment control sample root 02	Morex	roots	7 days	2	copper treatment control
PRJNA382490	Heavy metal, copper	SRR5452127	SAMN06718689	4513	7 day old roots, Copper control	copper treatment control sample root 03	Morex	roots	7 days	3	copper treatment control
PRJNA382490	Heavy metal, copper	SRR5452125	SAMN06718691	4513	7 day old roots Copper treatment	copper treatment treated sample root 01	Morex	roots	7 days	1	copper treatment treated
PRJNA382490	Heavy metal, copper	SRR5452123	SAMN06718693	4513	7 day old roots Copper treatment	copper treatment treated sample root 02	Morex	roots	7 days	2	copper treatment treated
PRJNA382490	Heavy metal, copper	SRR5452121	SAMN06718695	4513	7 day old roots Copper treatment	copper treatment treated sample root 03	Morex	roots	7 days	3	copper treatment treated
PRJNA382490	Heavy metal, zinc	SRR5452119	SAMN06718697	4513	7 day old roots, Zinc control	zinc treatment control sample root 01	Morex	roots	7 days	1	zinc treatment control
PRJNA382490	Heavy metal, zinc	SRR5452117	SAMN06718699	4513	7 day old roots, Zinc control	zinc treatment control sample root 02	Morex	roots	7 days	2	zinc treatment control
PRJNA382490	Heavy metal, zinc	SRR5452115	SAMN06718701	4513	7 day old roots, Zinc control	zinc treatment control sample root 03	Morex	roots	7 days	3	zinc treatment control
PRJNA382490	Heavy metal, zinc	SRR5452113	SAMN06718703	4513	7 day old roots Zinc treatment	zinc treatment treated sample root 01	Morex	roots	7 days	1	zinc treatment treated
PRJNA382490	Heavy metal, zinc	SRR5452111	SAMN06718705	4513	7 day old roots Zinc treatment	zinc treatment treated sample root 02	Morex	roots	7 days	2	zinc treatment treated
PRJNA382490	Heavy metal, zinc	SRR5452109	SAMN06718707	4513	7 day old roots Zinc treatment	zinc treatment treated sample root 03	Morex	roots	7 days	3	zinc treatment treated
PRJNA382490	Heavy metal, cadmium	SRR5452108	SAMN06718708	4513	7 day old Shoots, Cadmium control	cadmium treatment control sample shoot 01	Morex	shoots	7 days	1	cadmium treatment control
PRJNA382490	Heavy metal, cadmium	SRR5452106	SAMN06718710	4513	7 day old Shoots, Cadmium control	cadmium treatment control sample shoot 02	Morex	shoots	7 days	2	cadmium treatment control
PRJNA382490	Heavy metal, cadmium	SRR5452104	SAMN06718712	4513	7 day old Shoots, Cadmium control	cadmium treatment control sample shoot 03	Morex	shoots	7 days	3	cadmium treatment control
PRJNA382490	Heavy metal, cadmium	SRR5452102	SAMN06718714	4513	7 day old shoots Cadmium treatment	cadmium treatment treated sample shoot 01	Morex	shoots	7 days	1	cadmium treatment treated
PRJNA382490	Heavy metal, cadmium	SRR5452100	SAMN06718716	4513	7 day old shoots Cadmium treatment	cadmium treatment treated sample shoot 02	Morex	shoots	7 days	2	cadmium treatment treated
PRJNA382490	Heavy metal, cadmium	SRR5452098	SAMN06718718	4513	7 day old shoots Cadmium treatment	cadmium treatment treated sample shoot 03	Morex	shoots	7 days	3	cadmium treatment treated
PRJNA382490	Heavy metal, copper	SRR5452132	SAMN06718684	4513	7 day old shoots, Copper control	copper treatment control sample shoot 01	Morex	shoots	7 days	1	copper treatment control
PRJNA382490	Heavy metal, copper	SRR5452130	SAMN06718686	4513	7 day old shoots, Copper control	copper treatment control sample shoot 02	Morex	shoots	7 days	2	copper treatment control
PRJNA382490	Heavy metal, copper	SRR5452128	SAMN06718688	4513	7 day old shoots, Copper control	copper treatment control sample shoot 03	Morex	shoots	7 days	3	copper treatment control
PRJNA382490	Heavy metal, copper	SRR5452126	SAMN06718690	4513	7 day old shoots, Copper treatment	copper treatment treated sample shoot 01	Morex	shoots	7 days	1	copper treatment treated
PRJNA382490	Heavy metal, copper	SRR5452124	SAMN06718692	4513	7 day old shoots, Copper treatment	copper treatment treated sample shoot 02	Morex	shoots	7 days	2	copper treatment treated
PRJNA382490	Heavy metal, copper	SRR5452122	SAMN06718694	4513	7 day old shoots, Copper treatment	copper treatment treated sample shoot 03	Morex	shoots	7 days	3	copper treatment treated
PRJNA382490	Heavy metal, zinc	SRR5452120	SAMN06718696	4513	7 day old shoots, Zinc control	zinc treatment control sample shoot 01	Morex	shoots	7 days	1	zinc treatment control
PRJNA382490	Heavy metal, zinc	SRR5452118	SAMN06718698	4513	7 day old shoots, Zinc control	zinc treatment control sample shoot 02	Morex	shoots	7 days	2	zinc treatment control
PRJNA382490	Heavy metal, zinc	SRR5452116	SAMN06718700	4513	7 day old shoots, Zinc control	zinc treatment control sample shoot 03	Morex	shoots	7 days	3	zinc treatment control
PRJNA382490	Heavy metal, zinc	SRR5452114	SAMN06718702	4513	7 day old shoots, Zinc treatment	zinc treatment treated sample shoot 01	Morex	shoots	7 days	1	zinc treatment treated
PRJNA382490	Heavy metal, zinc	SRR5452112	SAMN06718704	4513	7 day old shoots, Zinc treatment	zinc treatment treated sample shoot 02	Morex	shoots	7 days	2	zinc treatment treated
PRJNA382490	Heavy metal, zinc	SRR5452110	SAMN06718706	4513	7 day old shoots, Zinc treatment	zinc treatment treated sample shoot 03	Morex	shoots	7 days	3	zinc treatment treated
PRJNA639318	Salt stress	SRR12044052	SAMN15232838	112509	32 day old seedlings control roots	CK-Morex-R1	Morex	roots	32 days	1	NaCl treatment control	The genome and gene editing system of sea barleygrass provide a novel platform for cereal domestication and stress tolerance studies	https://doi.org/10.1016/j.xplc.2022.100333
PRJNA639318	Salt stress	SRR12044051	SAMN15232839	112509	32 day old seedlings control roots	CK-Morex-R2	Morex	roots	32 days	2	NaCl treatment control
PRJNA639318	Salt stress	SRR12044050	SAMN15232840	112509	32 day old seedlings control roots	CK-Morex-R3	Morex	roots	32 days	3	NaCl treatment control
PRJNA639318	Salt stress	SRR12044042	SAMN15232847	112509	32 day old seedlings 150mM Nacl roots	S150-Morex-R1	Morex	roots	32 days	1	150mM NaCl treatment
PRJNA639318	Salt stress	SRR12044041	SAMN15232848	112509	32 day old seedlings 150mM Nacl roots	S150-Morex-R2	Morex	roots	32 days	2	150mM NaCl treatment
PRJNA639318	Salt stress	SRR12044040	SAMN15232849	112509	32 day old seedlings 150mM Nacl roots	S150-Morex-R3	Morex	roots	32 days	3	150mM NaCl treatment
PRJNA639318	Salt stress	SRR12044032	SAMN15232856	112509	32 day old seedlings 300mM Nacl roots	S300-Morex-R1	Morex	roots	32 days	1	300mM NaCl treatment
PRJNA639318	Salt stress	SRR12044031	SAMN15232857	112509	32 day old seedlings 300mM Nacl roots	S300-Morex-R2	Morex	roots	32 days	2	300mM NaCl treatment
PRJNA639318	Salt stress	SRR12044030	SAMN15232858	112509	32 day old seedlings 300mM Nacl roots	S300-Morex-R3	Morex	roots	32 days	3	300mM NaCl treatment
PRJNA639318	Salt stress	SRR12044072	SAMN15232811	112509	32 day old seedlings control shoots	CK-Morex-S1	Morex	shoots	32 days	1	NaCl treatment control
PRJNA639318	Salt stress	SRR12044071	SAMN15232812	112509	32 day old seedlings control shoots	CK-Morex-S2	Morex	shoots	32 days	2	NaCl treatment control
PRJNA639318	Salt stress	SRR12044060	SAMN15232813	112509	32 day old seedlings control shoots	CK-Morex-S3	Morex	shoots	32 days	3	NaCl treatment control
PRJNA639318	Salt stress	SRR12044019	SAMN15232820	112509	32 day old seedlings 150mM Nacl shoots	S150-Morex-S1	Morex	shoots	32 days	1	150mM NaCl treatment
PRJNA639318	Salt stress	SRR12044070	SAMN15232821	112509	32 day old seedlings 150mM Nacl shoots	S150-Morex-S2	Morex	shoots	32 days	2	150mM NaCl treatment
PRJNA639318	Salt stress	SRR12044069	SAMN15232822	112509	32 day old seedlings 150mM Nacl shoots	S150-Morex-S3	Morex	shoots	32 days	3	150mM NaCl treatment
PRJNA639318	Salt stress	SRR12044062	SAMN15232829	112509	32 day old seedlings 300mM Nacl shoots	S300-Morex-S1	Morex	shoots	32 days	1	300mM NaCl treatment
PRJNA639318	Salt stress	SRR12044061	SAMN15232830	112509	32 day old seedlings 300mM Nacl shoots	S300-Morex-S2	Morex	shoots	32 days	2	300mM NaCl treatment
PRJNA639318	Salt stress	SRR12044059	SAMN15232831	112509	32 day old seedlings 300mM Nacl shoots	S300-Morex-S3	Morex	shoots	32 days	3	300mM NaCl treatment
PRJNA661163	ABA treatment	SRR12638964	SAMN16047333	4513	2-3 leaf stage EtOH control 1 hr roots	Control_1h_1	Morex	roots	2-3 leaf stage	1	control 1h	Genome-wide identification of sucrose nonfermenting-1-related protein kinase (SnRK) genes in barley and RNA-seq analyses of their expression in response to ABA treatment	https://doi.org/10.1186/s12864-021-07601-6
PRJNA661163	ABA treatment	SRR12638963	SAMN16047334	4513	2-3 leaf stage EtOH control 1 hr roots	Control_1h_2	Morex	roots	2-3 leaf stage	2	control 1h
PRJNA661163	ABA treatment	SRR12638952	SAMN16047335	4513	2-3 leaf stage EtOH control 1 hr roots	Control_1h_3	Morex	roots	2-3 leaf stage	3	control 1h
PRJNA661163	ABA treatment	SRR12638947	SAMN16047336	4513	2-3 leaf stage EtOH control 3 hr roots	Control_3h_1	Morex	roots	2-3 leaf stage	1	control 3h
PRJNA661163	ABA treatment	SRR12638946	SAMN16047337	4513	2-3 leaf stage EtOH control 3 hr roots	Control_3h_2	Morex	roots	2-3 leaf stage	2	control 3h
PRJNA661163	ABA treatment	SRR12638945	SAMN16047338	4513	2-3 leaf stage EtOH control 3 hr roots	Control_3h_3	Morex	roots	2-3 leaf stage	3	control 3h
PRJNA661163	ABA treatment	SRR12638944	SAMN16047339	4513	2-3 leaf stage EtOH control 6 hr roots	Control_6h_1	Morex	roots	2-3 leaf stage	1	control 6h
PRJNA661163	ABA treatment	SRR12638943	SAMN16047340	4513	2-3 leaf stage EtOH control 6 hr roots	Control_6h_2	Morex	roots	2-3 leaf stage	2	control 6h
PRJNA661163	ABA treatment	SRR12638942	SAMN16047341	4513	2-3 leaf stage EtOH control 6 hr roots	Control_6h_3	Morex	roots	2-3 leaf stage	3	control 6h
PRJNA661163	ABA treatment	SRR12638941	SAMN16047342	4513	2-3 leaf stage EtOH control 24 hr roots	Control_24h_1	Morex	roots	2-3 leaf stage	1	control 24h
PRJNA661163	ABA treatment	SRR12638962	SAMN16047343	4513	2-3 leaf stage EtOH control 24 hr roots	Control_24h_2	Morex	roots	2-3 leaf stage	2	control 24h
PRJNA661163	ABA treatment	SRR12638961	SAMN16047344	4513	2-3 leaf stage EtOH control 24 hr roots	Control_24h_3	Morex	roots	2-3 leaf stage	3	control 24h
PRJNA661163	ABA treatment	SRR12638960	SAMN16047345	4513	2-3 leaf stage EtOH + ABA 1 hr roots	ABA_1h_1	Morex	roots	2-3 leaf stage	1	ABA 1h
PRJNA661163	ABA treatment	SRR12638959	SAMN16047346	4513	2-3 leaf stage EtOH + ABA 1 hr roots	ABA_1h_2	Morex	roots	2-3 leaf stage	2	ABA 1h
PRJNA661163	ABA treatment	SRR12638958	SAMN16047347	4513	2-3 leaf stage EtOH + ABA 1 hr roots	ABA_1h_3	Morex	roots	2-3 leaf stage	3	ABA 1h
PRJNA661163	ABA treatment	SRR12638957	SAMN16047348	4513	2-3 leaf stage EtOH + ABA 3 hr roots	ABA_3h_1	Morex	roots	2-3 leaf stage	1	ABA 3h
PRJNA661163	ABA treatment	SRR12638956	SAMN16047349	4513	2-3 leaf stage EtOH + ABA 3 hr roots	ABA_3h_2	Morex	roots	2-3 leaf stage	2	ABA 3h
PRJNA661163	ABA treatment	SRR12638955	SAMN16047350	4513	2-3 leaf stage EtOH + ABA 3 hr roots	ABA_3h_3	Morex	roots	2-3 leaf stage	3	ABA 3h
PRJNA661163	ABA treatment	SRR12638954	SAMN16047351	4513	2-3 leaf stage EtOH + ABA 6 hr roots	ABA_6h_1	Morex	roots	2-3 leaf stage	1	ABA 6h
PRJNA661163	ABA treatment	SRR12638953	SAMN16047352	4513	2-3 leaf stage EtOH + ABA 6 hr roots	ABA_6h_2	Morex	roots	2-3 leaf stage	2	ABA 6h
PRJNA661163	ABA treatment	SRR12638951	SAMN16047353	4513	2-3 leaf stage EtOH + ABA 6 hr roots	ABA_6h_3	Morex	roots	2-3 leaf stage	3	ABA 6h
PRJNA661163	ABA treatment	SRR12638950	SAMN16047354	4513	2-3 leaf stage EtOH + ABA 24 hr roots	ABA_24h_1	Morex	roots	2-3 leaf stage	1	ABA 24h
PRJNA661163	ABA treatment	SRR12638949	SAMN16047355	4513	2-3 leaf stage EtOH + ABA 24 hr roots	ABA_24h_2	Morex	roots	2-3 leaf stage	2	ABA 24h
PRJNA661163	ABA treatment	SRR12638948	SAMN16047356	4513	2-3 leaf stage EtOH + ABA 24 hr roots	ABA_24h_3	Morex	roots	2-3 leaf stage	3	ABA 24h
Developmental Tissue samples
study_accession	Study Keyword	run_accession	sample_accession	tax_id	sample_description	sample_title	cultivar	tissue_type	dev_stage	bio_replicate	expt_conditions
PRJEB14349	16 developmental stages	ERR1457163	SAMEA4034914	4513	Developing grain, bracts removed (5 DPA), replicate 2, batch 2	CAR5_2_B2	Morex	caryopsis	5 DPA	1		A chromosome conformation capture ordered sequence of the barley genome.	https://doi.org/10.1038/nature22043
PRJEB14349	16 developmental stages	ERR1457188	SAMEA4034939	4513	Developing grain, bracts removed (5 DPA), replicate 2, batch 1	CAR5_2_B1	Morex	caryopsis	5 DPA	1
PRJEB14349	16 developmental stages	ERR1457164	SAMEA4034915	4513	Developing grain, bracts removed (5 DPA), replicate 3, batch 2	CAR5_3_B2	Morex	caryopsis	5 DPA	2
PRJEB14349	16 developmental stages	ERR1457189	SAMEA4034940	4513	Developing grain, bracts removed (5 DPA), replicate 3, batch 1	CAR5_3_B1	Morex	caryopsis	5 DPA	2
PRJEB14349	16 developmental stages	ERR1457165	SAMEA4034916	4513	Developing grain, bracts removed (5 DPA), replicate 4, batch 2	CAR5_4_B2	Morex	caryopsis	5 DPA	3
PRJEB14349	16 developmental stages	ERR1457190	SAMEA4034941	4513	Developing grain, bracts removed (5 DPA), replicate 4, batch 1	CAR5_4_B1	Morex	caryopsis	5 DPA	3
PRJEB14349	16 developmental stages	ERR1457172	SAMEA4034923	4513	Developing grain, bracts removed (15 DPA), replicate 1, batch 2	CAR15_1_B2	Morex	caryopsis	15 DPA	1
PRJEB14349	16 developmental stages	ERR1457197	SAMEA4034948	4513	Developing grain, bracts removed (15 DPA), replicate 1, batch 1	CAR15_1_B1	Morex	caryopsis	15 DPA	1
PRJEB14349	16 developmental stages	ERR1457173	SAMEA4034924	4513	Developing grain, bracts removed (15 DPA), replicate 2, batch 2	CAR15_2_B2	Morex	caryopsis	15 DPA	2
PRJEB14349	16 developmental stages	ERR1457198	SAMEA4034949	4513	Developing grain, bracts removed (15 DPA), replicate 2, batch 1	CAR15_2_B1	Morex	caryopsis	15 DPA	2
PRJEB14349	16 developmental stages	ERR1457174	SAMEA4034925	4513	Developing grain, bracts removed (15 DPA), replicate 4, batch 2	CAR15_4_B2	Morex	caryopsis	15 DPA	3
PRJEB14349	16 developmental stages	ERR1457199	SAMEA4034950	4513	Developing grain, bracts removed (15 DPA), replicate 4, batch 1	CAR15_4_B1	Morex	caryopsis	15 DPA	3
PRJEB14349	16 developmental stages	ERR1457184	SAMEA4034935	4513	Young developing inflorescences (5mm), replicate A, batch 2	INF1_a_B2	Morex	developing inflorescence	5 mm	1
PRJEB14349	16 developmental stages	ERR1457209	SAMEA4034960	4513	Young developing inflorescences (5mm), replicate A, batch 1	INF1_a_B1	Morex	developing inflorescence	5 mm	1
PRJEB14349	16 developmental stages	ERR1457185	SAMEA4034936	4513	Young developing inflorescences (5mm), replicate B, batch 2	INF1_b_B2	Morex	developing inflorescence	5 mm	2
PRJEB14349	16 developmental stages	ERR1457210	SAMEA4034961	4513	Young developing inflorescences (5mm), replicate B, batch 1	INF1_b_B1	Morex	developing inflorescence	5 mm	2
PRJEB14349	16 developmental stages	ERR1457186	SAMEA4034937	4513	Young developing inflorescences (5mm), replicate c, batch 2	INF1_c_B2	Morex	developing inflorescence	5 mm	3
PRJEB14349	16 developmental stages	ERR1457211	SAMEA4034962	4513	Young developing inflorescences (5mm), replicate c, batch 1	INF1_c_B1	Morex	developing inflorescence	5 mm	3
PRJEB14349	16 developmental stages	ERR1457178	SAMEA4034929	4513	Developing inflorescences (1-1.5 cm), replicate F, batch 2	INF2_f_B2	Morex	developing inflorescence	10-15 mm	1
PRJEB14349	16 developmental stages	ERR1457203	SAMEA4034954	4513	Developing inflorescences (1-1.5 cm), replicate F, batch 1	INF2_f_B1	Morex	developing inflorescence	10-15 mm	1
PRJEB14349	16 developmental stages	ERR1457179	SAMEA4034930	4513	Developing inflorescences (1-1.5 cm), replicate G, batch 2	INF2_g_B2	Morex	developing inflorescence	10-15 mm	2
PRJEB14349	16 developmental stages	ERR1457204	SAMEA4034955	4513	Developing inflorescences (1-1.5 cm), replicate G, batch 1	INF2_g_B1	Morex	developing inflorescence	10-15 mm	2
PRJEB14349	16 developmental stages	ERR1457180	SAMEA4034931	4513	Developing inflorescences (1-1.5 cm), replicate H, batch 2	INF2_h_B2	Morex	developing inflorescence	10-15 mm	3
PRJEB14349	16 developmental stages	ERR1457205	SAMEA4034956	4513	Developing inflorescences (1-1.5 cm), replicate H, batch 1	INF2_h_B1	Morex	developing inflorescence	10-15 mm	3
PRJEB14349	16 developmental stages	ERR1457166	SAMEA4034917	4513	4-day embryos dissected from germinating grains, replicate A, batch 2	EMB_a_B2	Morex	embryo	4 DPG	1
PRJEB14349	16 developmental stages	ERR1457191	SAMEA4034942	4513	4-day embryos dissected from germinating grains, replicate A, batch 1	EMB_a_B1	Morex	embryo	4 DPG	1
PRJEB14349	16 developmental stages	ERR1457167	SAMEA4034918	4513	4-day embryos dissected from germinating grains, replicate B, batch 2	EMB_b_B2	Morex	embryo	4 DPG	2
PRJEB14349	16 developmental stages	ERR1457192	SAMEA4034943	4513	4-day embryos dissected from germinating grains, replicate B, batch 1	EMB_b_B1	Morex	embryo	4 DPG	2
PRJEB14349	16 developmental stages	ERR1457168	SAMEA4034919	4513	4-day embryos dissected from germinating grains, replicate C, batch 2	EMB_c_B2	Morex	embryo	4 DPG	3
PRJEB14349	16 developmental stages	ERR1457193	SAMEA4034944	4513	4-day embryos dissected from germinating grains, replicate C, batch 1	EMB_c_B1	Morex	embryo	4 DPG	3
PRJEB14349	16 developmental stages	ERR1457224	SAMEA4034975	4513	Epidermis (4 weeks ), replicate1, batch1	EPI_1_B1	Morex	epidermis	4 weeks	1
PRJEB14349	16 developmental stages	ERR1457248	SAMEA4034999	4513	Epidermis (4 weeks ), replicate1, batch2	EPI_1_B2	Morex	epidermis	4 weeks	1
PRJEB14349	16 developmental stages	ERR1457225	SAMEA4034976	4513	Epidermis (4 weeks ), replicate2, batch1	EPI_2_B1	Morex	epidermis	4 weeks	2
PRJEB14349	16 developmental stages	ERR1457249	SAMEA4035000	4513	Epidermis (4 weeks ), replicate2, batch2	EPI_2_B2	Morex	epidermis	4 weeks	2
PRJEB14349	16 developmental stages	ERR1457226	SAMEA4034977	4513	Epidermis (4 weeks ), replicate3, batch1	EPI_3_B1	Morex	epidermis	4 weeks	3
PRJEB14349	16 developmental stages	ERR1457250	SAMEA4035001	4513	Epidermis (4 weeks ), replicate3, batch2	EPI_3_B2	Morex	epidermis	4 weeks	3
PRJEB14349	16 developmental stages	ERR1457212	SAMEA4034963	4513	Etiolated (10 day old seedling), replicate1, batch1	ETI_1_B1	Morex	etiolated leaf	10 day old seedling	1
PRJEB14349	16 developmental stages	ERR1457236	SAMEA4034987	4513	Etiolated (10 day old seedling), replicate1, batch2	ETI_1_B2	Morex	etiolated leaf	10 day old seedling	1
PRJEB14349	16 developmental stages	ERR1457213	SAMEA4034964	4513	Etiolated (10 day old seedling), replicate2, batch1	ETI_2_B1	Morex	etiolated leaf	10 day old seedling	2
PRJEB14349	16 developmental stages	ERR1457237	SAMEA4034988	4513	Etiolated (10 day old seedling), replicate2, batch2	ETI_2_B2	Morex	etiolated leaf	10 day old seedling	2
PRJEB14349	16 developmental stages	ERR1457214	SAMEA4034965	4513	Etiolated (10 day old seedling), replicate3, batch1	ETI_3_B1	Morex	etiolated leaf	10 day old seedling	3
PRJEB14349	16 developmental stages	ERR1457238	SAMEA4034989	4513	Etiolated (10 day old seedling), replicate3, batch2	ETI_3_B2	Morex	etiolated leaf	10 day old seedling	3
PRJEB14349	16 developmental stages	ERR1457181	SAMEA4034932	4513	Developing tillers at six leaf stage, 3rd internode, replicate A, batch 2	NOD_a_B2	Morex	internode	42 DO	1
PRJEB14349	16 developmental stages	ERR1457206	SAMEA4034957	4513	Developing tillers at six leaf stage, 3rd internode, replicate A, batch 1	NOD_a_B1	Morex	internode	42 DO	1
PRJEB14349	16 developmental stages	ERR1457182	SAMEA4034933	4513	Developing tillers at six leaf stage, 3rd internode, replicate B, batch 2	NOD_b_B2	Morex	internode	42 DO	2
PRJEB14349	16 developmental stages	ERR1457207	SAMEA4034958	4513	Developing tillers at six leaf stage, 3rd internode, replicate B, batch 1	NOD_b_B1	Morex	internode	42 DO	2
PRJEB14349	16 developmental stages	ERR1457183	SAMEA4034934	4513	Developing tillers at six leaf stage, 3rd internode, replicate C, batch 2	NOD_c_B2	Morex	internode	42 DO	3
PRJEB14349	16 developmental stages	ERR1457208	SAMEA4034959	4513	Developing tillers at six leaf stage, 3rd internode, replicate C, batch 1	NOD_c_B1	Morex	internode	42 DO	3
PRJEB14349	16 developmental stages	ERR1457187	SAMEA4034938	4513	Developing tillers at six leaf stage, 3rd internode, replicate B, batch 2	extraNOD_b_B2	Morex	internode	42 DO	2
PRJEB14349	16 developmental stages	ERR1457175	SAMEA4034926	4513	Shoots from the seedlings (10 cm shoot stage), replicate A, batch 2	LEA_a_B2	Morex	leaf	10 cm shoot	1
PRJEB14349	16 developmental stages	ERR1457200	SAMEA4034951	4513	Shoots from the seedlings (10 cm shoot stage), replicate A, batch 1	LEA_a_B1	Morex	leaf	10 cm shoot	1
PRJEB14349	16 developmental stages	ERR1457176	SAMEA4034927	4513	Shoots from the seedlings (10 cm shoot stage), replicate B, batch 2	LEA_b_B2	Morex	leaf	10 cm shoot	2
PRJEB14349	16 developmental stages	ERR1457201	SAMEA4034952	4513	Shoots from the seedlings (10 cm shoot stage), replicate B, batch 1	LEA_b_B1	Morex	leaf	10 cm shoot	2
PRJEB14349	16 developmental stages	ERR1457177	SAMEA4034928	4513	Shoots from the seedlings (10 cm shoot stage), replicate C, batch 2	LEA_c_B2	Morex	leaf	10 cm shoot	3
PRJEB14349	16 developmental stages	ERR1457202	SAMEA4034953	4513	Shoots from the seedlings (10 cm shoot stage), replicate C, batch 1	LEA_c_B1	Morex	leaf	10 cm shoot	3
PRJEB14349	16 developmental stages	ERR1457215	SAMEA4034966	4513	Lemma (6 weeks after planting), replicate1, batch1	LEM_1_B1	Morex	lemma	6 weeks PA	1
PRJEB14349	16 developmental stages	ERR1457239	SAMEA4034990	4513	Lemma (6 weeks PA), replicate1, batch2	LEM_1_B2	Morex	lemma	6 weeks PA	1
PRJEB14349	16 developmental stages	ERR1457216	SAMEA4034967	4513	Lemma (6 weeks PA), replicate2, batch1	LEM_2_B1	Morex	lemma	6 weeks PA	2
PRJEB14349	16 developmental stages	ERR1457240	SAMEA4034991	4513	Lemma (6 weeks PA), replicate2, batch2	LEM_2_B2	Morex	lemma	6 weeks PA	2
PRJEB14349	16 developmental stages	ERR1457217	SAMEA4034968	4513	Lemma (6 weeks PA), replicate3, batch1	LEM_3_B1	Morex	lemma	6 weeks PA	3
PRJEB14349	16 developmental stages	ERR1457241	SAMEA4034992	4513	Lemma (6 weeks PA), replicate3, batch2	LEM_3_B2	Morex	lemma	6 weeks PA	3
PRJEB14349	16 developmental stages	ERR1457218	SAMEA4034969	4513	Lodicule (6 weeks after planting), replicate1, batch1	LOD_1_B1	Morex	lodicule	6 weeks PA	1
PRJEB14349	16 developmental stages	ERR1457242	SAMEA4034993	4513	Lodicule (6 weeks PA), replicate1, batch2	LOD_1_B2	Morex	lodicule	6 weeks PA	1
PRJEB14349	16 developmental stages	ERR1457219	SAMEA4034970	4513	Lodicule (6 weeks PA), replicate2, batch1	LOD_2_B1	Morex	lodicule	6 weeks PA	2
PRJEB14349	16 developmental stages	ERR1457243	SAMEA4034994	4513	Lodicule (6 weeks PA), replicate2, batch2	LOD_2_B2	Morex	lodicule	6 weeks PA	2
PRJEB14349	16 developmental stages	ERR1457220	SAMEA4034971	4513	Lodicule (6 weeks PA), replicate3, batch1	LOD_3_B1	Morex	lodicule	6 weeks PA	3
PRJEB14349	16 developmental stages	ERR1457244	SAMEA4034995	4513	Lodicule (6 weeks PA), replicate3, batch2	LOD_3_B2	Morex	lodicule	6 weeks PA	3
PRJEB14349	16 developmental stages	ERR1457221	SAMEA4034972	4513	Palea (6 weeks after planting), replicate1, batch1	PAL_1_B1	Morex	palea	6 weeks PA	1
PRJEB14349	16 developmental stages	ERR1457245	SAMEA4034996	4513	Palea (6 weeks PA), replicate1, batch2	PAL_1_B2	Morex	palea	6 weeks PA	1
PRJEB14349	16 developmental stages	ERR1457222	SAMEA4034973	4513	Palea (6 weeks PA), replicate2, batch1	PAL_2_B1	Morex	palea	6 weeks PA	2
PRJEB14349	16 developmental stages	ERR1457246	SAMEA4034997	4513	Palea (6 weeks PA), replicate2, batch2	PAL_2_B2	Morex	palea	6 weeks PA	2
PRJEB14349	16 developmental stages	ERR1457223	SAMEA4034974	4513	Palea (6 weeks PA), replicate3, batch1	PAL_3_B1	Morex	palea	6 weeks PA	3
PRJEB14349	16 developmental stages	ERR1457247	SAMEA4034998	4513	Palea (6 weeks PA), replicate3, batch2	PAL_3_B2	Morex	palea	6 weeks PA	3
PRJEB14349	16 developmental stages	ERR1457227	SAMEA4034978	4513	Rachis (5 weeks after planting), replicate1, batch1	RAC_1_B1	Morex	rachis	5 weeks PA	1
PRJEB14349	16 developmental stages	ERR1457251	SAMEA4035002	4513	Rachis (5 weeks PA), replicate1, batch2	RAC_1_B2	Morex	rachis	5 weeks PA	1
PRJEB14349	16 developmental stages	ERR1457228	SAMEA4034979	4513	Rachis (5 weeks PA), replicate2, batch1	RAC_2_B1	Morex	rachis	5 weeks PA	2
PRJEB14349	16 developmental stages	ERR1457252	SAMEA4035003	4513	Rachis (5 weeks PA), replicate2, batch2	RAC_2_B2	Morex	rachis	5 weeks PA	2
PRJEB14349	16 developmental stages	ERR1457229	SAMEA4034980	4513	Rachis (5 weeks PA), replicate3, batch1	RAC_3_B1	Morex	rachis	5 weeks PA	3
PRJEB14349	16 developmental stages	ERR1457253	SAMEA4035004	4513	Rachis (5 weeks PA), replicate3, batch2	RAC_3_B2	Morex	rachis	5 weeks PA	3
PRJEB14349	16 developmental stages	ERR1457230	SAMEA4034981	4513	Root (4 weeks ), replicate1, batch1	ROO2_1_B1	Morex	root	4 week seedling	1
PRJEB14349	16 developmental stages	ERR1457254	SAMEA4035005	4513	Root (4 weeks ), replicate1, batch2	ROO2_1_B2	Morex	root	4 week seedling	1
PRJEB14349	16 developmental stages	ERR1457231	SAMEA4034982	4513	Root (4 weeks ), replicate2, batch1	ROO2_2_B1	Morex	root	4 week seedling	2
PRJEB14349	16 developmental stages	ERR1457255	SAMEA4035006	4513	Root (4 weeks ), replicate2, batch2	ROO2_2_B2	Morex	root	4 week seedling	2
PRJEB14349	16 developmental stages	ERR1457232	SAMEA4034983	4513	Root (4 weeks ), replicate3, batch1	ROO2_3_B1	Morex	root	4 week seedling	3
PRJEB14349	16 developmental stages	ERR1457256	SAMEA4035007	4513	Root (4 weeks ), replicate3, batch2	ROO2_3_B2	Morex	root	4 week seedling	3
PRJEB14349	16 developmental stages	ERR1457169	SAMEA4034920	4513	Roots from the seedlings (10 cm shoot stage), replicate A, batch 2	ROO_a_B2	Morex	root	10 cm shoot	1
PRJEB14349	16 developmental stages	ERR1457194	SAMEA4034945	4513	Roots from the seedlings (10 cm shoot stage), replicate A, batch 1	ROO_a_B1	Morex	root	10 cm shoot	1
PRJEB14349	16 developmental stages	ERR1457170	SAMEA4034921	4513	Roots from the seedlings (10 cm shoot stage), replicate B, batch 2	ROO_b_B2	Morex	root	10 cm shoot	2
PRJEB14349	16 developmental stages	ERR1457195	SAMEA4034946	4513	Roots from the seedlings (10 cm shoot stage), replicate B, batch 1	ROO_b_B1	Morex	root	10 cm shoot	2
PRJEB14349	16 developmental stages	ERR1457171	SAMEA4034922	4513	Roots from the seedlings (10 cm shoot stage), replicate C, batch 2	ROO_c_B2	Morex	root	10 cm shoot	3
PRJEB14349	16 developmental stages	ERR1457196	SAMEA4034947	4513	Roots from the seedlings (10 cm shoot stage), replicate C, batch 1	ROO_c_B1	Morex	root	10 cm shoot	3
PRJEB14349	16 developmental stages	ERR1457233	SAMEA4034984	4513	Senescing leaf (2months), replicate1, batch1	SEN_1_B1	Morex	senescing leaf	2 months	1
PRJEB14349	16 developmental stages	ERR1457257	SAMEA4035008	4513	Senescing leaf (2months), replicate1, batch2	SEN_1_B2	Morex	senescing leaf	2 months	1
PRJEB14349	16 developmental stages	ERR1457234	SAMEA4034985	4513	Senescing leaf (2months), replicate2, batch1	SEN_2_B1	Morex	senescing leaf	2 months	2
PRJEB14349	16 developmental stages	ERR1457258	SAMEA4035009	4513	Senescing leaf (2months), replicate2, batch2	SEN_2_B2	Morex	senescing leaf	2 months	2
PRJEB14349	16 developmental stages	ERR1457235	SAMEA4034986	4513	Senescing leaf (2months), replicate3, batch1	SEN_3_B1	Morex	senescing leaf	2 months	3
PRJEB14349	16 developmental stages	ERR1457259	SAMEA4035010	4513	Senescing leaf (2months), replicate3, batch2	SEN_3_B2	Morex	senescing leaf	2 months	3
PRJNA910827	pollen	SRR22672690	SAMN32145656	4513	mature pollen	HvuPol_RepA	Morex	mature pollen	flowering	1		RNA-seq of Triticeae pollen and stigma samples	unpublished - no publication attached
PRJNA910827	pollen	SRR22672689	SAMN32145656	4513	mature pollen	HvuPol_RepB	Morex	mature pollen	flowering	2
PRJNA910827	pollen	SRR22672688	SAMN32145656	4513	mature pollen	HvuPol_RepC	Morex	mature pollen	flowering	3
PRJNA910827	stigma	SRR22672687	SAMN32145657	4513	mature stigma	HvuStig_RepA	Morex	mature stigma	flowering	1
PRJNA910827	stigma	SRR22672686	SAMN32145657	4513	mature stigma	HvuStig_RepB	Morex	mature stigma	flowering	2
PRJNA910827	stigma	SRR22672685	SAMN32145657	4513	mature stigma	HvuStig_RepC	Morex	mature stigma	flowering	3
PRJNA975859	Grain Development	SRR24724057	SAMN35345539	4513	embryo 8 DAP	83686_EMB_08_REP1	Morex	seed embryo	caryopsis	1		The transcriptome landscape of developing barley seeds reveals H3K27me3 dynamics in endosperm tissues	https://doi.org/10.1101/2023.07.26.550659
PRJNA975859	Grain Development	SRR24724056	SAMN35345538	4513	embryo 8 DAP	83687_EMB_08_REP2	Morex	seed embryo	caryopsis	2
PRJNA975859	Grain Development	SRR24724055	SAMN35345537	4513	embryo 8 DAP	88539_EMB_08_REP3	Morex	seed embryo	caryopsis	3
PRJNA975859	Grain Development	SRR24724054	SAMN35345536	4513	embryo 16 DAP	83690_EMB_16_REP1	Morex	seed embryo	caryopsis	1
PRJNA975859	Grain Development	SRR24724053	SAMN35345535	4513	embryo 16 DAP	83691_EMB_16_REP2	Morex	seed embryo	caryopsis	2
PRJNA975859	Grain Development	SRR24724052	SAMN35345534	4513	embryo 16 DAP	88542_EMB_16_REP3	Morex	seed embryo	caryopsis	3
PRJNA975859	Grain Development	SRR24724051	SAMN35345533	4513	embryo 24DAP	83682_EMB_24_REP1	Morex	seed embryo	caryopsis	1
PRJNA975859	Grain Development	SRR24724050	SAMN35345532	4513	embryo 24DAP	83683_EMB_24_REP2	Morex	seed embryo	caryopsis	2
PRJNA975859	Grain Development	SRR24724049	SAMN35345531	4513	embryo 24DAP	97733_EMB_24_REP3	Morex	seed embryo	caryopsis	3
PRJNA975859	Grain Development	SRR24724048	SAMN35345530	4513	embryo 32 DAP	104713_EMB_32_REP1	Morex	seed embryo	caryopsis	1
PRJNA975859	Grain Development	SRR24724047	SAMN35345529	4513	embryo 32 DAP	104714_EMB_32_REP2	Morex	seed embryo	caryopsis	2
PRJNA975859	Grain Development	SRR24724046	SAMN35345528	4513	embryo 32 DAP	104715_EMB_32_REP3	Morex	seed embryo	caryopsis	3
PRJNA975859	Grain Development	SRR24724077	SAMN35345554	4513	endosperm 4 DAP	102865_END_04_REP1	Morex	seed endosperm	caryopsis	1
PRJNA975859	Grain Development	SRR24724076	SAMN35345553	4513	endosperm 4 DAP	102866_END_04_REP2	Morex	seed endosperm	caryopsis	2
PRJNA975859	Grain Development	SRR24724070	SAMN35345552	4513	endosperm 4 DAP	102867_END_04_REP3	Morex	seed endosperm	caryopsis	3
PRJNA975859	Grain Development	SRR24724069	SAMN35345551	4513	endosperm 8 DAP	83688_END_08_REP1	Morex	seed endosperm	caryopsis	1
PRJNA975859	Grain Development	SRR24724068	SAMN35345550	4513	endosperm 8 DAP	83689_END_08_REP2	Morex	seed endosperm	caryopsis	2
PRJNA975859	Grain Development	SRR24724067	SAMN35345549	4513	endosperm 8 DAP	88540_END_08_REP3	Morex	seed endosperm	caryopsis	3
PRJNA975859	Grain Development	SRR24724066	SAMN35345548	4513	endosperm 16 DAP	83680_END_16_REP1	Morex	seed endosperm	caryopsis	1
PRJNA975859	Grain Development	SRR24724065	SAMN35345547	4513	endosperm 16 DAP	83681_END_16_REP2	Morex	seed endosperm	caryopsis	2
PRJNA975859	Grain Development	SRR24724064	SAMN35345546	4513	endosperm 16 DAP	89204_END_16_REP3	Morex	seed endosperm	caryopsis	3
PRJNA975859	Grain Development	SRR24724063	SAMN35345545	4513	endosperm 24 DAP	83684_END_24_REP1	Morex	seed endosperm	caryopsis	1
PRJNA975859	Grain Development	SRR24724062	SAMN35345544	4513	endosperm 24 DAP	83685_END_24_REP2	Morex	seed endosperm	caryopsis	2
PRJNA975859	Grain Development	SRR24724061	SAMN35345543	4513	endosperm 24 DAP	88543_END_24_REP3	Morex	seed endosperm	caryopsis	3
PRJNA975859	Grain Development	SRR24724060	SAMN35345542	4513	endosperm 32 DAP	104710_END_32_REP1	Morex	seed endosperm	caryopsis	1
PRJNA975859	Grain Development	SRR24724059	SAMN35345541	4513	endosperm 32 DAP	104711_END_32_REP2	Morex	seed endosperm	caryopsis	2
PRJNA975859	Grain Development	SRR24724058	SAMN35345540	4513	endosperm 32 DAP	104712_END_32_REP3	Morex	seed endosperm	caryopsis	3
PRJNA975859	Grain Development	SRR24724045	SAMN35345527	4513	seed maternal tissues 4 DAP	89199_SMT_04_REP1	Morex	seed maternal tissue	caryopsis	1
PRJNA975859	Grain Development	SRR24724044	SAMN35345526	4513	seed maternal tissues 4 DAP	89200_SMT_04_REP2	Morex	seed maternal tissue	caryopsis	2
PRJNA975859	Grain Development	SRR24724043	SAMN35345525	4513	seed maternal tissues 4 DAP	89201_SMT_04_REP3	Morex	seed maternal tissue	caryopsis	3
PRJNA975859	Grain Development	SRR24724042	SAMN35345524	4513	seed maternal tissues 8 DAP	89202_SMT_08_REP1	Morex	seed maternal tissue	caryopsis	1
PRJNA975859	Grain Development	SRR24724041	SAMN35345523	4513	seed maternal tissues 8 DAP	89203_SMT_08_REP2	Morex	seed maternal tissue	caryopsis	2
PRJNA975859	Grain Development	SRR24724040	SAMN35345522	4513	seed maternal tissues 8 DAP	88541_SMT_08_REP3	Morex	seed maternal tissue	caryopsis	3
PRJNA975859	Grain Development	SRR24724039	SAMN35345521	4513	seed maternal tissues 16 DAP	97740_SMT_16_REP1	Morex	seed maternal tissue	caryopsis	1
PRJNA975859	Grain Development	SRR24724075	SAMN35345520	4513	seed maternal tissues 16 DAP	97741_SMT_16_REP2	Morex	seed maternal tissue	caryopsis	2
PRJNA975859	Grain Development	SRR24724074	SAMN35345519	4513	seed maternal tissues 16 DAP	97742_SMT_16_REP3	Morex	seed maternal tissue	caryopsis	3
PRJNA975859	Grain Development	SRR24724073	SAMN35345518	4513	seed maternal tissues 24 DAP	97743_SMT_24_REP1	Morex	seed maternal tissue	caryopsis	1
PRJNA975859	Grain Development	SRR24724072	SAMN35345517	4513	seed maternal tissues 24 DAP	97744_SMT_24_REP2	Morex	seed maternal tissue	caryopsis	2
PRJNA975859	Grain Development	SRR24724071	SAMN35345516	4513	seed maternal tissues 24 DAP	97745_SMT_24_REP3	Morex	seed maternal tissue	caryopsis	3
PRJNA589222	Root	SRR10436255	SAMN13269169	112509	root elongation zone		Morex	root elongation zone	3 days	1		ENHANCED GRAVITROPISM 2 encodes a STERILE ALPHA MOTIF–containing protein that controls root growth angle in barley and wheat	https://doi.org/10.1073/pnas.2101526118
PRJNA589222	Root	SRR10436259	SAMN13269166	112509	root elongation zone		Morex	root elongation zone	3 days	2
PRJNA589222	Root	SRR10436262	SAMN13269163	112509	root elongation zone		Morex	root elongation zone	3 days	3
PRJNA589222	Root	SRR10436265	SAMN13269160	112509	root elongation zone		Morex	root elongation zone	3 days	4
PRJNA589222	Root	SRR10436257	SAMN13269168	112509	root meristem		Morex	root meristem	3 days	1
PRJNA589222	Root	SRR10436260	SAMN13269165	112509	root meristem		Morex	root meristem	3 days	2
PRJNA589222	Root	SRR10436263	SAMN13269162	112509	root meristem		Morex	root meristem	3 days	3
PRJNA589222	Root	SRR10436266	SAMN13269159	112509	root meristem		Morex	root meristem	3 days	4
PRJNA589222	Root	SRR10436245	SAMN13269158	112509	root cap		Morex	root cap	3 days	1
PRJNA589222	Root	SRR10436258	SAMN13269167	112509	root cap		Morex	root cap	3 days	2
PRJNA589222	Root	SRR10436261	SAMN13269164	112509	root cap		Morex	root cap	3 days	3
PRJNA589222	Root	SRR10436264	SAMN13269161	112509	root cap		Morex	root cap	3 days	4
PRJEB64639	Pan Transcriptome	ERR11786522	SAMEA114228364	4513	germinating grain 4-8 days (minus seed)	Morex embryo replicate 1	Morex	germinating grain	4-8 days germination	1		TBC	This paper
PRJEB64639	Pan Transcriptome	ERR11786523	SAMEA114228386	4513	germinating grain 4-8 days (minus seed)	Morex embryo replicate 2	Morex	germinating grain	4-8 days germination	2
PRJEB64639	Pan Transcriptome	ERR11786524	SAMEA114228408	4513	germinating grain 4-8 days (minus seed)	Morex embryo replicate 3	Morex	germinating grain	4-8 days germination	3
PRJEB64639	Pan Transcriptome	ERR11786531	SAMEA114228430	4513	14 day seedling shoot	Morex seedling epicotyl replicate 1	Morex	epicotyl	14 days epicotyl	1
PRJEB64639	Pan Transcriptome	ERR11786532	SAMEA114228452	4513	14 day seedling shoot	Morex seedling epicotyl replicate 2	Morex	epicotyl	14 days epicotyl	2
PRJEB64639	Pan Transcriptome	ERR11786533	SAMEA114228474	4513	14 day seedling shoot	Morex seedling epicotyl replicate 3	Morex	epicotyl	14 days epicotyl	3
PRJEB64639	Pan Transcriptome	ERR11786528	SAMEA114228496	4513	14 day seedling root	Morex root replicate 1	Morex	root	14 days shoot	1
PRJEB64639	Pan Transcriptome	ERR11786529	SAMEA114228517	4513	14 day seedling root	Morex root replicate 2	Morex	root	14 days shoot	2
PRJEB64639	Pan Transcriptome	ERR11786530	SAMEA114228539	4513	14 day seedling root	Morex root replicate 3	Morex	root	14 days shoot	3
PRJEB64639	Pan Transcriptome	ERR11786525	SAMEA114228561	4513	1-1.5 cm Inflorescence	Morex inflorescence replicate 1	Morex	inflorescence	1-1.5 cm Inflorescence	1
PRJEB64639	Pan Transcriptome	ERR11786526	SAMEA114228583	4513	1-1.5 cm Inflorescence	Morex inflorescence replicate 2	Morex	inflorescence	1-1.5 cm Inflorescence	2
PRJEB64639	Pan Transcriptome	ERR11786527	SAMEA114228604	4513	1-1.5 cm Inflorescence	Morex inflorescence replicate 3	Morex	inflorescence	1-1.5 cm Inflorescence	3
PRJEB64639	Pan Transcriptome	ERR11786519	SAMEA114228626	4513	Developing Caryopsis 15-20 DPA	Morex caryopsis replicate 1	Morex	caryopsis	Caryopsis 15-20 DPA	1
PRJEB64639	Pan Transcriptome	ERR11786520	SAMEA114228648	4513	Developing Caryopsis 15-20 DPA	Morex caryopsis replicate 2	Morex	caryopsis	Caryopsis 15-20 DPA	2
PRJEB64639	Pan Transcriptome	ERR11786521	SAMEA114228669	4513	Developing Caryopsis 15-20 DPA	Morex caryopsis replicate 3	Morex	caryopsis	Caryopsis 15-20 DPA	3
	Developmental tissue
	Control for treatment
	Treatment
