# Supplementary material for: A barley pan-transcriptome reveals layers of genotype-dependent transcriptional complexity
Source: Research Square preprint supplement (doi:10.21203/rs.3.rs-3787876/v1), 2024-01-08
Supplement: Supplementary file 11 [file f310e15f2e73e75196f4015e.xlsx]

## Sheet: Sheet1
Supplementary Data 9 Detailed example of a split pattern in Golden Promise
Table shows an example of a large split cluster for which Golden Promise orthologs associate to community C2 while orthologs of the remaining other 19 genotypes group to community C4. The entire cluster comprised 57 PanBaRT2.0 orthogroups. This table lists only those 33 orthogroups with either a mercator annotation or genes for which their rice ortholog had a published functional description. A l…
PanBaRT20	Symbol Os	Description (Mercator)	Rice ortholog description
chr5H44943		Oxidoreductases EC 1.14
chr7H79007		transferase transferring one-carbon group EC 2.1
chr3H33882		RlmN-type rRNA methyltransferase
chr4H34982	OsICE1, OsbHLH002	bHLH-type transcription factor	Regulates trehalose-phosphate phosphatase OsTPP1
chr2H12388	OsHMA7		Zn-Fe transporter
chr6H64086		Glycosyltransferase EC 2.4
chr4H39327		uroporphyrinogen III decarboxylase
chr4H37410		organellar peptide chain release factor PrfA
chr1H06101	YGL1, OsCHLG	chlorophyll synthase	yellow-green leaf1 mutant
chr3H26612	OsClpP3		virescent yellow leaf (vyl) mutant: plastidic caseinolytic protease
chr1H06571		plastidial ribosome biogenesis factor CRASS
chr5H55556		plastid-encoded RNA polymerase TAC13 component
chr7H78879		plastidial iron permease PIC1
chr7H70234	OsGLP1		Germin-like 1, hyperaccumulation H2O2
chr3H28542		NDH complex assembly factor CCR41
chr7H69741		pectin methylesterase
chr3H23434	OsHCF222		HIGH CHLOROPHYLL FLUORESCENCE 222: ROS homeostasis, thylakoid membrane
chr3H27411		Plastidial mRNA chaperone RLSB/BSF
chr4H42806		ribosome-associated chaperone NAC-α
chr6H60766	Cga1	GATA transcription factor	CYTOKININ-RESPONSIVE GATA TRANSCRIPTION FACTOR1: chloroplast biogenesis and starch biosynthesis
chr5H46400	TCD11	Plastid ribosomal protein S6	chloroplast development at low temperature
chr1H09365		MYB-RELATED transcription factor
chr4H42917		NDH complex assembly factor CCR1
chr7H76950		NDH complex assembly factor CCR42
chr6H58059	OsLIL3	photosystem II	Light harvesting protein 3
chr2H13745		Organellar peptide chain release factor PrfB
chr5H53480		NDH complex assembly factor NDF5
chr6H59614	SPL42	uroporphyrinogen III formation	SPOTTED LEAF42: porphobilinogen deaminase
chr1H03960		RuBisCo assembly factor RAF1
chr5H46662		plastidial acyl carrier protein ptACP
chr7H73446		regulatory factor GluTRBP, tetrapyrrol synthesis
chr1H01124		photosystem II assembly factor TerC
chr6H59327		oxidoreductases EC 1.14
